# Supplementary material for: Genome Sequence Analysis of the Fungal Pathogen Fusarium graminearum Using Oxford Nanopore Technology
Source: J Fungi (Basel). 2021 Aug 27;7(9):699. doi: 10.3390/jof7090699 (PMC8465144; doi:10.3390/jof7090699)
Supplement: Supplementary file 1 [file jof-07-00699-s001.zip › Supplemental Tables_revised.xlsx]

## Sheet: Table S1
Table S1. F. graminearum genomes listed in the NCBI database
#Organism Name	Organism Groups	Strain	BioSample	BioProject	Origin	Assembly	Level	Size (Mb)	GC content (%)	WGS	Scaffolds	CDS	Release Date	GenBank FTP
Fusarium graminearum	Eukaryota;Fungi;Ascomycetes	PH-1; NRRL 31084	SAMN02953593	PRJNA13839	USA	GCA_000240135.3	Chromosome	36.458	48.3278	AACM02	31	13313	2003-05-09T00:00:00Z	ftp://ftp.ncbi.nlm.nih.gov/genomes/all/GCA/000/240/135/GCA_000240135.3_ASM24013v3
Fusarium graminearum	Eukaryota;Fungi;Ascomycetes	PH-1	SAMEA3283145	PRJEB5475	USA	GCA_900044135.1	Chromosome	38.0479	48.1531		6	14143	2014-10-22T00:00:00Z	ftp://ftp.ncbi.nlm.nih.gov/genomes/all/GCA/900/044/135/GCA_900044135.1_GZPH1RResV1
Fusarium graminearum	Eukaryota;Fungi;Ascomycetes	CS3005	SAMN02585717	PRJNA235346	Australia	GCA_000599445.1	Chromosome	36.6676	48.0236	JATU01	199	13355	2014-03-20T00:00:00Z	ftp://ftp.ncbi.nlm.nih.gov/genomes/all/GCA/000/599/445/GCA_000599445.1_CS3005v1
Fusarium graminearum	Eukaryota;Fungi;Ascomycetes	N4_2	SAMN16774509	PRJNA677929	Europe	GCA_018346015.1	Scaffold	36.7755	48	JADPOI01	9	0	2021-05-12T00:00:00Z	ftp://ftp.ncbi.nlm.nih.gov/genomes/all/GCA/018/346/015/GCA_018346015.1_ASM1834601v1
Fusarium graminearum	Eukaryota;Fungi;Ascomycetes	14C1	SAMN16774479	PRJNA677929	Europe	GCA_018346495.1	Scaffold	36.0937	48.3	JADPPG01	14	0	2021-05-12T00:00:00Z	ftp://ftp.ncbi.nlm.nih.gov/genomes/all/GCA/018/346/495/GCA_018346495.1_ASM1834649v1
Fusarium graminearum	Eukaryota;Fungi;Ascomycetes	343	SAMN16774527	PRJNA677929	Europe	GCA_018345745.1	Scaffold	36.0737	48.4	JADPNV01	17	0	2021-05-12T00:00:00Z	ftp://ftp.ncbi.nlm.nih.gov/genomes/all/GCA/018/345/745/GCA_018345745.1_ASM1834574v1
Fusarium graminearum	Eukaryota;Fungi;Ascomycetes	58918	SAMN16774541	PRJNA677929	Europe	GCA_018345515.1	Scaffold	36.6338	48.1	JADPNJ01	17	0	2021-05-12T00:00:00Z	ftp://ftp.ncbi.nlm.nih.gov/genomes/all/GCA/018/345/515/GCA_018345515.1_ASM1834551v1
Fusarium graminearum	Eukaryota;Fungi;Ascomycetes	S17-12	SAMN16774528	PRJNA677929	Europe	GCA_018219515.1	Scaffold	36.795	48.1	JADPWQ01	38	0	2021-04-30T00:00:00Z	ftp://ftp.ncbi.nlm.nih.gov/genomes/all/GCA/018/219/515/GCA_018219515.1_ASM1821951v1
Fusarium graminearum	Eukaryota;Fungi;Ascomycetes	Fg820	SAMN16774477	PRJNA677929	Europe	GCA_018346565.1	Scaffold	36.3903	48.3	JADPPI01	20	0	2021-05-12T00:00:00Z	ftp://ftp.ncbi.nlm.nih.gov/genomes/all/GCA/018/346/565/GCA_018346565.1_ASM1834656v1
Fusarium graminearum	Eukaryota;Fungi;Ascomycetes	237	SAMN16774491	PRJNA677929	Europe	GCA_018346265.1	Scaffold	36.0022	48.3	JADPOU01	20	0	2021-05-12T00:00:00Z	ftp://ftp.ncbi.nlm.nih.gov/genomes/all/GCA/018/346/265/GCA_018346265.1_ASM1834626v1
Fusarium graminearum	Eukaryota;Fungi;Ascomycetes	FG_08	SAMN16774495	PRJNA677929	Europe	GCA_018346165.1	Scaffold	36.1711	48.2	JADPOQ01	14	0	2021-05-12T00:00:00Z	ftp://ftp.ncbi.nlm.nih.gov/genomes/all/GCA/018/346/165/GCA_018346165.1_ASM1834616v1
Fusarium graminearum	Eukaryota;Fungi;Ascomycetes	N6_2	SAMN16774508	PRJNA677929	Europe	GCA_018346045.1	Scaffold	36.0532	48.2	JADPOJ01	22	0	2021-05-12T00:00:00Z	ftp://ftp.ncbi.nlm.nih.gov/genomes/all/GCA/018/346/045/GCA_018346045.1_ASM1834604v1
Fusarium graminearum	Eukaryota;Fungi;Ascomycetes	N6_1	SAMN16774501	PRJNA677929	Europe	GCA_018219745.1	Scaffold	36.5944	48	JADPWZ01	16	0	2021-04-30T00:00:00Z	ftp://ftp.ncbi.nlm.nih.gov/genomes/all/GCA/018/219/745/GCA_018219745.1_ASM1821974v1
Fusarium graminearum	Eukaryota;Fungi;Ascomycetes	70725	SAMN16774549	PRJNA677929	Europe	GCA_018345395.1	Scaffold	36.3486	48.2	JADPND01	17	0	2021-05-12T00:00:00Z	ftp://ftp.ncbi.nlm.nih.gov/genomes/all/GCA/018/345/395/GCA_018345395.1_ASM1834539v1
Fusarium graminearum	Eukaryota;Fungi;Ascomycetes	Fr10a3	SAMN16774471	PRJNA677929	Europe	GCA_018346705.1	Scaffold	36.424	48.3	JADPPO01	32	0	2021-05-12T00:00:00Z	ftp://ftp.ncbi.nlm.nih.gov/genomes/all/GCA/018/346/705/GCA_018346705.1_ASM1834670v1
Fusarium graminearum	Eukaryota;Fungi;Ascomycetes	S18-55	SAMN16774531	PRJNA677929	Europe	GCA_018345735.1	Scaffold	36.6689	48.1	JADPNS01	24	0	2021-05-12T00:00:00Z	ftp://ftp.ncbi.nlm.nih.gov/genomes/all/GCA/018/345/735/GCA_018345735.1_ASM1834573v1
Fusarium graminearum	Eukaryota;Fungi;Ascomycetes	N5_3	SAMN16774511	PRJNA677929	Europe	GCA_018346005.1	Scaffold	36.3056	48.3	JADPOG01	27	0	2021-05-12T00:00:00Z	ftp://ftp.ncbi.nlm.nih.gov/genomes/all/GCA/018/346/005/GCA_018346005.1_ASM1834600v1
Fusarium graminearum	Eukaryota;Fungi;Ascomycetes	L14b	SAMN16774473	PRJNA677929	Europe	GCA_018346585.1	Scaffold	36.3434	48.2	JADPPM01	18	0	2021-05-12T00:00:00Z	ftp://ftp.ncbi.nlm.nih.gov/genomes/all/GCA/018/346/585/GCA_018346585.1_ASM1834658v1
Fusarium graminearum	Eukaryota;Fungi;Ascomycetes	Fr1b2	SAMN16774472	PRJNA677929	Europe	GCA_018346715.1	Scaffold	36.2365	48.2	JADPPN01	18	0	2021-05-12T00:00:00Z	ftp://ftp.ncbi.nlm.nih.gov/genomes/all/GCA/018/346/715/GCA_018346715.1_ASM1834671v1
Fusarium graminearum	Eukaryota;Fungi;Ascomycetes	CS9907	SAMN16774497	PRJNA677929	Europe	GCA_018346155.1	Scaffold	36.0793	48.3	JADPOO01	27	0	2021-05-12T00:00:00Z	ftp://ftp.ncbi.nlm.nih.gov/genomes/all/GCA/018/346/155/GCA_018346155.1_ASM1834615v1
Fusarium graminearum	Eukaryota;Fungi;Ascomycetes	16-462-z	SAMN16774517	PRJNA677929	Europe	GCA_018345975.1	Scaffold	36.7113	48.3	JADPOC01	37	0	2021-05-12T00:00:00Z	ftp://ftp.ncbi.nlm.nih.gov/genomes/all/GCA/018/345/975/GCA_018345975.1_ASM1834597v1
Fusarium graminearum	Eukaryota;Fungi;Ascomycetes	S8A	SAMN16774475	PRJNA677929	Europe	GCA_018346625.1	Scaffold	36.2435	48.3	JADPPK01	22	0	2021-05-12T00:00:00Z	ftp://ftp.ncbi.nlm.nih.gov/genomes/all/GCA/018/346/625/GCA_018346625.1_ASM1834662v1
Fusarium graminearum	Eukaryota;Fungi;Ascomycetes	St-6	SAMN16774539	PRJNA677929	Europe	GCA_018345585.1	Scaffold	36.1882	48.4	JADPNL01	24	0	2021-05-12T00:00:00Z	ftp://ftp.ncbi.nlm.nih.gov/genomes/all/GCA/018/345/585/GCA_018345585.1_ASM1834558v1
Fusarium graminearum	Eukaryota;Fungi;Ascomycetes	HZ26A	SAMN16774483	PRJNA677929	Europe	GCA_018346455.1	Scaffold	36.3006	48.3	JADPPC01	26	0	2021-05-12T00:00:00Z	ftp://ftp.ncbi.nlm.nih.gov/genomes/all/GCA/018/346/455/GCA_018346455.1_ASM1834645v1
Fusarium graminearum	Eukaryota;Fungi;Ascomycetes	F1B	SAMN16774469	PRJNA677929	Europe	GCA_018346685.1	Scaffold	36.9594	48.3	JADPPQ01	33	0	2021-05-12T00:00:00Z	ftp://ftp.ncbi.nlm.nih.gov/genomes/all/GCA/018/346/685/GCA_018346685.1_ASM1834668v1
Fusarium graminearum	Eukaryota;Fungi;Ascomycetes	RH14A	SAMN16774484	PRJNA677929	Europe	GCA_018346425.1	Scaffold	36.278	48.3	JADPPB01	24	0	2021-05-12T00:00:00Z	ftp://ftp.ncbi.nlm.nih.gov/genomes/all/GCA/018/346/425/GCA_018346425.1_ASM1834642v1
Fusarium graminearum	Eukaryota;Fungi;Ascomycetes	ITA_1606	SAMN16774535	PRJNA677929	Europe	GCA_018345645.1	Scaffold	36.2645	48.3	JADPNO01	32	0	2021-05-12T00:00:00Z	ftp://ftp.ncbi.nlm.nih.gov/genomes/all/GCA/018/345/645/GCA_018345645.1_ASM1834564v1
Fusarium graminearum	Eukaryota;Fungi;Ascomycetes	4431	SAMN16774513	PRJNA677929	Europe	GCA_018345945.1	Scaffold	36.6575	48	JADPOF01	8	0	2021-05-12T00:00:00Z	ftp://ftp.ncbi.nlm.nih.gov/genomes/all/GCA/018/345/945/GCA_018345945.1_ASM1834594v1
Fusarium graminearum	Eukaryota;Fungi;Ascomycetes	3132	SAMN16774518	PRJNA677929	Europe	GCA_018345885.1	Scaffold	36.3904	48.1	JADPOB01	16	0	2021-05-12T00:00:00Z	ftp://ftp.ncbi.nlm.nih.gov/genomes/all/GCA/018/345/885/GCA_018345885.1_ASM1834588v1
Fusarium graminearum	Eukaryota;Fungi;Ascomycetes	16-92-z	SAMN16774519	PRJNA677929	Europe	GCA_018345845.1	Scaffold	36.0809	48.3	JADPOA01	11	0	2021-05-12T00:00:00Z	ftp://ftp.ncbi.nlm.nih.gov/genomes/all/GCA/018/345/845/GCA_018345845.1_ASM1834584v1
Fusarium graminearum	Eukaryota;Fungi;Ascomycetes	S18-4	SAMN16774529	PRJNA677929	Europe	GCA_018345715.1	Scaffold	36.5526	48.1	JADPNU01	22	0	2021-05-12T00:00:00Z	ftp://ftp.ncbi.nlm.nih.gov/genomes/all/GCA/018/345/715/GCA_018345715.1_ASM1834571v1
Fusarium graminearum	Eukaryota;Fungi;Ascomycetes	N2_1	SAMN16774503	PRJNA677929	Europe	GCA_018346095.1	Scaffold	36.1213	48.3	JADPOL01	18	0	2021-05-12T00:00:00Z	ftp://ftp.ncbi.nlm.nih.gov/genomes/all/GCA/018/346/095/GCA_018346095.1_ASM1834609v1
Fusarium graminearum	Eukaryota;Fungi;Ascomycetes	09-21a	SAMN16774488	PRJNA677929	Europe	GCA_018346355.1	Contig	36.1107	48.3	JADPOX01	34	0	2021-05-12T00:00:00Z	ftp://ftp.ncbi.nlm.nih.gov/genomes/all/GCA/018/346/355/GCA_018346355.1_ASM1834635v1
Fusarium graminearum	Eukaryota;Fungi;Ascomycetes	09-03a	SAMN16774485	PRJNA677929	Europe	GCA_018346405.1	Scaffold	36.0593	48.3	JADPPA01	25	0	2021-05-12T00:00:00Z	ftp://ftp.ncbi.nlm.nih.gov/genomes/all/GCA/018/346/405/GCA_018346405.1_ASM1834640v1
Fusarium graminearum	Eukaryota;Fungi;Ascomycetes	S5A	SAMN16774474	PRJNA677929	Europe	GCA_018346635.1	Scaffold	36.046	48.3	JADPPL01	26	0	2021-05-12T00:00:00Z	ftp://ftp.ncbi.nlm.nih.gov/genomes/all/GCA/018/346/635/GCA_018346635.1_ASM1834663v1
Fusarium graminearum	Eukaryota;Fungi;Ascomycetes	AGV0002B	SAMN16774482	PRJNA677929	Europe	GCA_018346505.1	Scaffold	36.2639	48.3	JADPPD01	36	0	2021-05-12T00:00:00Z	ftp://ftp.ncbi.nlm.nih.gov/genomes/all/GCA/018/346/505/GCA_018346505.1_ASM1834650v1
Fusarium graminearum	Eukaryota;Fungi;Ascomycetes	1983-06-30	SAMN16774466	PRJNA677929	Europe	GCA_018346765.1	Scaffold	36.2517	48.3	JADPPS01	16	0	2021-05-12T00:00:00Z	ftp://ftp.ncbi.nlm.nih.gov/genomes/all/GCA/018/346/765/GCA_018346765.1_ASM1834676v1
Fusarium graminearum	Eukaryota;Fungi;Ascomycetes	Kr375-1	SAMN16774543	PRJNA677929	Europe	GCA_018345485.1	Scaffold	36.147	48.1	JADPNI01	26	0	2021-05-12T00:00:00Z	ftp://ftp.ncbi.nlm.nih.gov/genomes/all/GCA/018/345/485/GCA_018345485.1_ASM1834548v1
Fusarium graminearum	Eukaryota;Fungi;Ascomycetes	321	SAMN16774492	PRJNA677929	Europe	GCA_018346245.1	Scaffold	35.9523	48.3	JADPOT01	22	0	2021-05-12T00:00:00Z	ftp://ftp.ncbi.nlm.nih.gov/genomes/all/GCA/018/346/245/GCA_018346245.1_ASM1834624v1
Fusarium graminearum	Eukaryota;Fungi;Ascomycetes	C10a	SAMN16774468	PRJNA677929	Europe	GCA_018346695.1	Scaffold	36.0457	48.3	JADPPR01	26	0	2021-05-12T00:00:00Z	ftp://ftp.ncbi.nlm.nih.gov/genomes/all/GCA/018/346/695/GCA_018346695.1_ASM1834669v1
Fusarium graminearum	Eukaryota;Fungi;Ascomycetes	S18-66	SAMN16774532	PRJNA677929	Europe	GCA_018345675.1	Scaffold	36.2695	48.4	JADPNR01	30	0	2021-05-12T00:00:00Z	ftp://ftp.ncbi.nlm.nih.gov/genomes/all/GCA/018/345/675/GCA_018345675.1_ASM1834567v1
Fusarium graminearum	Eukaryota;Fungi;Ascomycetes	710	SAMN16774480	PRJNA677929	Europe	GCA_018346485.1	Scaffold	36.4694	48.3	JADPPF01	40	0	2021-05-12T00:00:00Z	ftp://ftp.ncbi.nlm.nih.gov/genomes/all/GCA/018/346/485/GCA_018346485.1_ASM1834648v1
Fusarium graminearum	Eukaryota;Fungi;Ascomycetes	114-2	SAMN16774465	PRJNA677929	Europe	GCA_018346805.1	Scaffold	36.6604	48	JADPPT01	17	0	2021-05-12T00:00:00Z	ftp://ftp.ncbi.nlm.nih.gov/genomes/all/GCA/018/346/805/GCA_018346805.1_ASM1834680v1
Fusarium graminearum	Eukaryota;Fungi;Ascomycetes	609	SAMN16774526	PRJNA677929	Europe	GCA_018219565.1	Scaffold	35.8929	48.4	JADPWR01	23	0	2021-04-30T00:00:00Z	ftp://ftp.ncbi.nlm.nih.gov/genomes/all/GCA/018/219/565/GCA_018219565.1_ASM1821956v1
Fusarium graminearum	Eukaryota;Fungi;Ascomycetes	CBS 104.09	SAMN16774554	PRJNA677929	Europe	GCA_018345295.1	Scaffold	36.4882	48.1	JADPMY01	20	0	2021-05-12T00:00:00Z	ftp://ftp.ncbi.nlm.nih.gov/genomes/all/GCA/018/345/295/GCA_018345295.1_ASM1834529v1
Fusarium graminearum	Eukaryota;Fungi;Ascomycetes	790	SAMN16774481	PRJNA677929	Europe	GCA_018346445.1	Scaffold	36.1192	48.3	JADPPE01	16	0	2021-05-12T00:00:00Z	ftp://ftp.ncbi.nlm.nih.gov/genomes/all/GCA/018/346/445/GCA_018346445.1_ASM1834644v1
Fusarium graminearum	Eukaryota;Fungi;Ascomycetes	336-3B	SAMN16774540	PRJNA677929	Europe	GCA_018345545.1	Scaffold	36.1111	48.3	JADPNK01	19	0	2021-05-12T00:00:00Z	ftp://ftp.ncbi.nlm.nih.gov/genomes/all/GCA/018/345/545/GCA_018345545.1_ASM1834554v1
Fusarium graminearum	Eukaryota;Fungi;Ascomycetes	CBS 110263	SAMN16774550	PRJNA677929	Europe	GCA_018345365.1	Scaffold	36.7731	48	JADPNC01	34	0	2021-05-12T00:00:00Z	ftp://ftp.ncbi.nlm.nih.gov/genomes/all/GCA/018/345/365/GCA_018345365.1_ASM1834536v1
Fusarium graminearum	Eukaryota;Fungi;Ascomycetes	FG_3211	SAMN16774494	PRJNA677929	Europe	GCA_018346255.1	Scaffold	36.0593	48.3	JADPOR01	23	0	2021-05-12T00:00:00Z	ftp://ftp.ncbi.nlm.nih.gov/genomes/all/GCA/018/346/255/GCA_018346255.1_ASM1834625v1
Fusarium graminearum	Eukaryota;Fungi;Ascomycetes	S18-49	SAMN16774530	PRJNA677929	Europe	GCA_018345725.1	Scaffold	36.4475	48.1	JADPNT01	20	0	2021-05-12T00:00:00Z	ftp://ftp.ncbi.nlm.nih.gov/genomes/all/GCA/018/345/725/GCA_018345725.1_ASM1834572v1
Fusarium graminearum	Eukaryota;Fungi;Ascomycetes	CBS 128539	SAMN16774476	PRJNA677929	Europe	GCA_018346575.1	Scaffold	36.7088	48.2	JADPPJ01	35	0	2021-05-12T00:00:00Z	ftp://ftp.ncbi.nlm.nih.gov/genomes/all/GCA/018/346/575/GCA_018346575.1_ASM1834657v1
Fusarium graminearum	Eukaryota;Fungi;Ascomycetes	42826	SAMN16774514	PRJNA677929	Europe	GCA_018345925.1	Scaffold	36.0601	48.3	JADPOE01	28	0	2021-05-12T00:00:00Z	ftp://ftp.ncbi.nlm.nih.gov/genomes/all/GCA/018/345/925/GCA_018345925.1_ASM1834592v1
Fusarium graminearum	Eukaryota;Fungi;Ascomycetes	N10_2	SAMN16774504	PRJNA677929	Europe	GCA_018219705.1	Scaffold	36.1187	48.2	JADPWX01	27	0	2021-04-30T00:00:00Z	ftp://ftp.ncbi.nlm.nih.gov/genomes/all/GCA/018/219/705/GCA_018219705.1_ASM1821970v1
Fusarium graminearum	Eukaryota;Fungi;Ascomycetes	359	SAMN16774515	PRJNA677929	Europe	GCA_018345915.1	Scaffold	35.9556	48.4	JADPOD01	33	0	2021-05-12T00:00:00Z	ftp://ftp.ncbi.nlm.nih.gov/genomes/all/GCA/018/345/915/GCA_018345915.1_ASM1834591v1
Fusarium graminearum	Eukaryota;Fungi;Ascomycetes	CS10007	SAMN16774496	PRJNA677929	Europe	GCA_018346145.1	Scaffold	36.8016	48.6	JADPOP01	22	0	2021-05-12T00:00:00Z	ftp://ftp.ncbi.nlm.nih.gov/genomes/all/GCA/018/346/145/GCA_018346145.1_ASM1834614v1
Fusarium graminearum	Eukaryota;Fungi;Ascomycetes	16-21-z	SAMN16774520	PRJNA677929	Europe	GCA_018345815.1	Scaffold	36.1381	48.4	JADPNZ01	20	0	2021-05-12T00:00:00Z	ftp://ftp.ncbi.nlm.nih.gov/genomes/all/GCA/018/345/815/GCA_018345815.1_ASM1834581v1
Fusarium graminearum	Eukaryota;Fungi;Ascomycetes	N8_2	SAMN16774507	PRJNA677929	Europe	GCA_018346035.1	Scaffold	37.0226	48.2	JADPOK01	44	0	2021-05-12T00:00:00Z	ftp://ftp.ncbi.nlm.nih.gov/genomes/all/GCA/018/346/035/GCA_018346035.1_ASM1834603v1
Fusarium graminearum	Eukaryota;Fungi;Ascomycetes	C10b	SAMN16774470	PRJNA677929	Europe	GCA_018346665.1	Scaffold	36.059	48.3	JADPPP01	24	0	2021-05-12T00:00:00Z	ftp://ftp.ncbi.nlm.nih.gov/genomes/all/GCA/018/346/665/GCA_018346665.1_ASM1834666v1
Fusarium graminearum	Eukaryota;Fungi;Ascomycetes	CBS 134070	SAMN16774462	PRJNA677929	Europe	GCA_018346815.1	Scaffold	36.6235	48	JADPPW01	25	0	2021-05-12T00:00:00Z	ftp://ftp.ncbi.nlm.nih.gov/genomes/all/GCA/018/346/815/GCA_018346815.1_ASM1834681v1
Fusarium graminearum	Eukaryota;Fungi;Ascomycetes	N7_1	SAMN16774506	PRJNA677929	Europe	GCA_018219635.1	Scaffold	36.0881	48.3	JADPWV01	33	0	2021-04-30T00:00:00Z	ftp://ftp.ncbi.nlm.nih.gov/genomes/all/GCA/018/219/635/GCA_018219635.1_ASM1821963v1
Fusarium graminearum	Eukaryota;Fungi;Ascomycetes	09-04a	SAMN16774486	PRJNA677929	Europe	GCA_018346325.1	Scaffold	36.3053	48.2	JADPOZ01	31	0	2021-05-12T00:00:00Z	ftp://ftp.ncbi.nlm.nih.gov/genomes/all/GCA/018/346/325/GCA_018346325.1_ASM1834632v1
Fusarium graminearum	Eukaryota;Fungi;Ascomycetes	09-13a	SAMN16774490	PRJNA677929	Europe	GCA_018346305.1	Scaffold	38.0839	47.9	JADPOV01	35	0	2021-05-12T00:00:00Z	ftp://ftp.ncbi.nlm.nih.gov/genomes/all/GCA/018/346/305/GCA_018346305.1_ASM1834630v1
Fusarium graminearum	Eukaryota;Fungi;Ascomycetes	MDC_Fg1	SAMEA4778736	PRJEB27611	Europe	GCA_900492705.1	Contig	36.8079	48	UIHA01	96	0	2018-09-05T00:00:00Z	ftp://ftp.ncbi.nlm.nih.gov/genomes/all/GCA/900/492/705/GCA_900492705.1_MDC_Fg1
Fusarium graminearum	Eukaryota;Fungi;Ascomycetes	16-521-z	SAMN16774516	PRJNA677929	Europe	GCA_018219645.1	Scaffold	35.8478	48.3	JADPWT01	27	0	2021-04-30T00:00:00Z	ftp://ftp.ncbi.nlm.nih.gov/genomes/all/GCA/018/219/645/GCA_018219645.1_ASM1821964v1
Fusarium graminearum	Eukaryota;Fungi;Ascomycetes	N10_1	SAMN16774505	PRJNA677929	Europe	GCA_018219675.1	Scaffold	36.2495	48.3	JADPWW01	32	0	2021-04-30T00:00:00Z	ftp://ftp.ncbi.nlm.nih.gov/genomes/all/GCA/018/219/675/GCA_018219675.1_ASM1821967v1
Fusarium graminearum	Eukaryota;Fungi;Ascomycetes	16-390-z	SAMN16774521	PRJNA677929	Europe	GCA_018345865.1	Scaffold	36.3474	48.3	JADPNY01	22	0	2021-05-12T00:00:00Z	ftp://ftp.ncbi.nlm.nih.gov/genomes/all/GCA/018/345/865/GCA_018345865.1_ASM1834586v1
Fusarium graminearum	Eukaryota;Fungi;Ascomycetes	CBS 185.32	SAMN16774553	PRJNA677929	Europe	GCA_018345335.1	Scaffold	36.5149	48.2	JADPMZ01	28	0	2021-05-12T00:00:00Z	ftp://ftp.ncbi.nlm.nih.gov/genomes/all/GCA/018/345/335/GCA_018345335.1_ASM1834533v1
Fusarium graminearum	Eukaryota;Fungi;Ascomycetes	630	SAMN16774493	PRJNA677929	Europe	GCA_018346225.1	Scaffold	36.3906	48.3	JADPOS01	41	0	2021-05-12T00:00:00Z	ftp://ftp.ncbi.nlm.nih.gov/genomes/all/GCA/018/346/225/GCA_018346225.1_ASM1834622v1
Fusarium graminearum	Eukaryota;Fungi;Ascomycetes	4501	SAMN16774512	PRJNA677929	Europe	GCA_018219625.1	Scaffold	36.3541	48.1	JADPWU01	33	0	2021-04-30T00:00:00Z	ftp://ftp.ncbi.nlm.nih.gov/genomes/all/GCA/018/219/625/GCA_018219625.1_ASM1821962v1
Fusarium graminearum	Eukaryota;Fungi;Ascomycetes	10F1	SAMN16774478	PRJNA677929	Europe	GCA_018346545.1	Scaffold	36.1592	48.4	JADPPH01	24	0	2021-05-12T00:00:00Z	ftp://ftp.ncbi.nlm.nih.gov/genomes/all/GCA/018/346/545/GCA_018346545.1_ASM1834654v1
Fusarium graminearum	Eukaryota;Fungi;Ascomycetes	N4_1	SAMN16774510	PRJNA677929	Europe	GCA_018345995.1	Scaffold	35.8675	48.2	JADPOH01	32	0	2021-05-12T00:00:00Z	ftp://ftp.ncbi.nlm.nih.gov/genomes/all/GCA/018/345/995/GCA_018345995.1_ASM1834599v1
Fusarium graminearum	Eukaryota;Fungi;Ascomycetes	09-05a	SAMN16774487	PRJNA677929	Europe	GCA_018346365.1	Scaffold	35.4039	48.4	JADPOY01	39	0	2021-05-12T00:00:00Z	ftp://ftp.ncbi.nlm.nih.gov/genomes/all/GCA/018/346/365/GCA_018346365.1_ASM1834636v1
Fusarium graminearum	Eukaryota;Fungi;Ascomycetes	09-53b	SAMN16774489	PRJNA677929	Europe	GCA_018346345.1	Scaffold	36.5721	48.1	JADPOW01	38	0	2021-05-12T00:00:00Z	ftp://ftp.ncbi.nlm.nih.gov/genomes/all/GCA/018/346/345/GCA_018346345.1_ASM1834634v1
Fusarium graminearum	Eukaryota;Fungi;Ascomycetes	178-7	SAMN16774546	PRJNA677929	Europe	GCA_018219525.1	Scaffold	36.0603	48.3	JADPWN01	45	0	2021-04-30T00:00:00Z	ftp://ftp.ncbi.nlm.nih.gov/genomes/all/GCA/018/219/525/GCA_018219525.1_ASM1821952v1
Fusarium graminearum	Eukaryota;Fungi;Ascomycetes	CBS 119799	SAMN16774551	PRJNA677929	Europe	GCA_018345325.1	Scaffold	36.662	48.1	JADPNB01	46	0	2021-05-12T00:00:00Z	ftp://ftp.ncbi.nlm.nih.gov/genomes/all/GCA/018/345/325/GCA_018345325.1_ASM1834532v1
Fusarium graminearum	Eukaryota;Fungi;Ascomycetes	187-2	SAMN16774548	PRJNA677929	Europe	GCA_018345415.1	Scaffold	36.0903	48.3	JADPNE01	48	0	2021-05-12T00:00:00Z	ftp://ftp.ncbi.nlm.nih.gov/genomes/all/GCA/018/345/415/GCA_018345415.1_ASM1834541v1
Fusarium graminearum	Eukaryota;Fungi;Ascomycetes	ITA_202	SAMN16774537	PRJNA677929	Europe	GCA_018345575.1	Scaffold	36.2926	48.3	JADPNM01	30	0	2021-05-12T00:00:00Z	ftp://ftp.ncbi.nlm.nih.gov/genomes/all/GCA/018/345/575/GCA_018345575.1_ASM1834557v1
Fusarium graminearum	Eukaryota;Fungi;Ascomycetes	2t275-1	SAMN16774542	PRJNA677929	Europe	GCA_018219575.1	Scaffold	36.2275	48.3	JADPWO01	47	0	2021-04-30T00:00:00Z	ftp://ftp.ncbi.nlm.nih.gov/genomes/all/GCA/018/219/575/GCA_018219575.1_ASM1821957v1
Fusarium graminearum	Eukaryota;Fungi;Ascomycetes	3-2	SAMN16774544	PRJNA677929	Europe	GCA_018345475.1	Scaffold	36.2768	48.3	JADPNH01	44	0	2021-05-12T00:00:00Z	ftp://ftp.ncbi.nlm.nih.gov/genomes/all/GCA/018/345/475/GCA_018345475.1_ASM1834547v1
Fusarium graminearum	Eukaryota;Fungi;Ascomycetes	ITEM 124	SAMN07455307	PRJNA397367	Europe	GCA_002352725.1	Scaffold	36.8838	48.2	NQOC01	67	11827	2017-09-25T00:00:00Z	ftp://ftp.ncbi.nlm.nih.gov/genomes/all/GCA/002/352/725/GCA_002352725.1_FGRA07
Fusarium graminearum	Eukaryota;Fungi;Ascomycetes	177-5	SAMN16774545	PRJNA677929	Europe	GCA_018345455.1	Scaffold	36.0926	48.3	JADPNG01	54	0	2021-05-12T00:00:00Z	ftp://ftp.ncbi.nlm.nih.gov/genomes/all/GCA/018/345/455/GCA_018345455.1_ASM1834545v1
Fusarium graminearum	Eukaryota;Fungi;Ascomycetes	17-98	SAMN16774547	PRJNA677929	Europe	GCA_018345435.1	Scaffold	36.2138	48.3	JADPNF01	44	0	2021-05-12T00:00:00Z	ftp://ftp.ncbi.nlm.nih.gov/genomes/all/GCA/018/345/435/GCA_018345435.1_ASM1834543v1
Fusarium graminearum	Eukaryota;Fungi;Ascomycetes	W185	SAMN16774525	PRJNA677929	Europe	GCA_018345795.1	Scaffold	36.0188	48.3	JADPNW01	57	0	2021-05-12T00:00:00Z	ftp://ftp.ncbi.nlm.nih.gov/genomes/all/GCA/018/345/795/GCA_018345795.1_ASM1834579v1
Fusarium graminearum	Eukaryota;Fungi;Ascomycetes	ITA_1601	SAMN16774533	PRJNA677929	Europe	GCA_018345655.1	Scaffold	36.558	48.2	JADPNQ01	35	0	2021-05-12T00:00:00Z	ftp://ftp.ncbi.nlm.nih.gov/genomes/all/GCA/018/345/655/GCA_018345655.1_ASM1834565v1
Fusarium graminearum	Eukaryota;Fungi;Ascomycetes	ITA_285	SAMN16774536	PRJNA677929	Europe	GCA_018345615.1	Scaffold	36.0663	48.3	JADPNN01	36	0	2021-05-12T00:00:00Z	ftp://ftp.ncbi.nlm.nih.gov/genomes/all/GCA/018/345/615/GCA_018345615.1_ASM1834561v1
Fusarium graminearum	Eukaryota;Fungi;Ascomycetes	MDC_Fg593	SAMEA8245889	PRJEB27611	Europe	GCA_905359455.1	Scaffold	36.4569	48.3	CAJPII01	203	12716	2021-03-25T00:00:00Z	ftp://ftp.ncbi.nlm.nih.gov/genomes/all/GCA/905/359/455/GCA_905359455.1_MDC_Fg593
Fusarium graminearum	Eukaryota;Fungi;Ascomycetes	TaB10	SAMN14604992	PRJNA625694	Europe	GCA_012959185.1	Scaffold	36.7643	48	JABCRB01	54	0	2020-05-04T00:00:00Z	ftp://ftp.ncbi.nlm.nih.gov/genomes/all/GCA/012/959/185/GCA_012959185.1_ASM1295918v1
Fusarium graminearum	Eukaryota;Fungi;Ascomycetes	GER_4527b	SAMN16774498	PRJNA677929	Europe	GCA_018346185.1	Scaffold	36.163	48.3	JADPON01	91	0	2021-05-12T00:00:00Z	ftp://ftp.ncbi.nlm.nih.gov/genomes/all/GCA/018/346/185/GCA_018346185.1_ASM1834618v1
Fusarium graminearum	Eukaryota;Fungi;Ascomycetes	ITA_1377	SAMN16774538	PRJNA677929	Europe	GCA_018219555.1	Scaffold	36.0088	48.3	JADPWP01	80	0	2021-04-30T00:00:00Z	ftp://ftp.ncbi.nlm.nih.gov/genomes/all/GCA/018/219/555/GCA_018219555.1_ASM1821955v1
Fusarium graminearum	Eukaryota;Fungi;Ascomycetes	23-4	SAMN16774467	PRJNA677929	Europe	GCA_018219715.1	Scaffold	36.2368	48.2	JADPXB01	76	0	2021-04-30T00:00:00Z	ftp://ftp.ncbi.nlm.nih.gov/genomes/all/GCA/018/219/715/GCA_018219715.1_ASM1821971v1
Fusarium graminearum	Eukaryota;Fungi;Ascomycetes	N5_1	SAMN16774502	PRJNA677929	Europe	GCA_018219795.1	Scaffold	36.3888	48.2	JADPWY01	88	0	2021-04-30T00:00:00Z	ftp://ftp.ncbi.nlm.nih.gov/genomes/all/GCA/018/219/795/GCA_018219795.1_ASM1821979v1
Fusarium graminearum	Eukaryota;Fungi;Ascomycetes	FG078	SAMN09387754	PRJNA475366	Europe	GCA_006942295.1	Scaffold	36.7757	48.3	VIGE01	335	0	2019-07-12T00:00:00Z	ftp://ftp.ncbi.nlm.nih.gov/genomes/all/GCA/006/942/295/GCA_006942295.1_Fgr0078
Fusarium graminearum	Eukaryota;Fungi;Ascomycetes	FN009	SAMEA4719586	PRJEB27209	Europe	GCA_900476405.1	Scaffold	36.8382	48.3	UCPH01	715	0	2018-06-18T00:00:00Z	ftp://ftp.ncbi.nlm.nih.gov/genomes/all/GCA/900/476/405/GCA_900476405.1_FN009
Fusarium graminearum	Eukaryota;Fungi;Ascomycetes	MDC_Fg851	SAMEA8245891	PRJEB27611	Europe	GCA_905359475.1	Scaffold	36.7603	48.3	CAJPIG01	278	13299	2021-03-25T00:00:00Z	ftp://ftp.ncbi.nlm.nih.gov/genomes/all/GCA/905/359/475/GCA_905359475.1_MDC_Fg851
Fusarium graminearum	Eukaryota;Fungi;Ascomycetes	MDC_Fg13	SAMEA5583570	PRJEB27611	Europe	GCA_901446245.1	Scaffold	36.7537	48.3	CABDWO01	283	13280	2019-05-13T00:00:00Z	ftp://ftp.ncbi.nlm.nih.gov/genomes/all/GCA/901/446/245/GCA_901446245.1_MDC_Fg13
Fusarium graminearum	Eukaryota;Fungi;Ascomycetes	GER_74b	SAMN16774500	PRJNA677929	Europe	GCA_018346115.1	Scaffold	36.1025	48.3	JADPOM01	89	0	2021-05-12T00:00:00Z	ftp://ftp.ncbi.nlm.nih.gov/genomes/all/GCA/018/346/115/GCA_018346115.1_ASM1834611v1
Fusarium graminearum	Eukaryota;Fungi;Ascomycetes	ITA_593	SAMN16774534	PRJNA677929	Europe	GCA_018345635.1	Scaffold	36.1997	48.6	JADPNP01	89	0	2021-05-12T00:00:00Z	ftp://ftp.ncbi.nlm.nih.gov/genomes/all/GCA/018/345/635/GCA_018345635.1_ASM1834563v1
Fusarium graminearum	Eukaryota;Fungi;Ascomycetes	GER_37	SAMN16774499	PRJNA677929	Europe	GCA_018219765.1	Scaffold	35.9298	48.3	JADPXA01	114	0	2021-04-30T00:00:00Z	ftp://ftp.ncbi.nlm.nih.gov/genomes/all/GCA/018/219/765/GCA_018219765.1_ASM1821976v1
Fusarium graminearum	Eukaryota;Fungi;Ascomycetes	NRRL28336	SAMN03958818	PRJNA291971	USA	GCA_001717905.1	Scaffold	36.6664	48.4	LHUD01	303	0	2016-08-31T00:00:00Z	ftp://ftp.ncbi.nlm.nih.gov/genomes/all/GCA/001/717/905/GCA_001717905.1_ASM171790v1
Fusarium graminearum	Eukaryota;Fungi;Ascomycetes	CBS 138562	SAMN16774523	PRJNA677929	Europe	GCA_018219485.1	Scaffold	35.5789	48.4	JADPXC01	402	0	2021-04-30T00:00:00Z	ftp://ftp.ncbi.nlm.nih.gov/genomes/all/GCA/018/219/485/GCA_018219485.1_ASM1821948v1
Fusarium graminearum	Eukaryota;Fungi;Ascomycetes	CBS 119173	SAMN16774461	PRJNA677929	Europe	GCA_018219475.1	Scaffold	36.2116	48.4	JADPXD01	520	0	2021-04-30T00:00:00Z	ftp://ftp.ncbi.nlm.nih.gov/genomes/all/GCA/018/219/475/GCA_018219475.1_ASM1821947v1
Fusarium graminearum	Eukaryota;Fungi;Ascomycetes	CBS 138561	SAMN16774522	PRJNA677929	Europe	GCA_018345835.1	Scaffold	36.3667	48.2	JADPNX01	621	0	2021-05-12T00:00:00Z	ftp://ftp.ncbi.nlm.nih.gov/genomes/all/GCA/018/345/835/GCA_018345835.1_ASM1834583v1
Fusarium graminearum	Eukaryota;Fungi;Ascomycetes	CBS 138563	SAMN16774524	PRJNA677929	Europe	GCA_018219615.1	Scaffold	35.9976	48.4	JADPWS01	551	0	2021-04-30T00:00:00Z	ftp://ftp.ncbi.nlm.nih.gov/genomes/all/GCA/018/219/615/GCA_018219615.1_ASM1821961v1
Fusarium graminearum	Eukaryota;Fungi;Ascomycetes	DAOM180378	SAMN03958819	PRJNA291971	Canada	GCA_001717915.1	Scaffold	36.3503	48.3	LHUC01	520	0	2016-08-31T00:00:00Z	ftp://ftp.ncbi.nlm.nih.gov/genomes/all/GCA/001/717/915/GCA_001717915.1_ASM171791v1
Fusarium graminearum	Eukaryota;Fungi;Ascomycetes	241165	SAMN03329222	PRJNA274567	Canada	GCA_000966645.1	Scaffold	36.5671	48.3	LAKA01	486	0	2015-03-31T00:00:00Z	ftp://ftp.ncbi.nlm.nih.gov/genomes/all/GCA/000/966/645/GCA_000966645.1_Fus_gra_241165_v1
Fusarium graminearum	Eukaryota;Fungi;Ascomycetes	119-12	SAMN16774464	PRJNA677929	Europe	GCA_018346775.1	Scaffold	36.1967	48.4	JADPPU01	891	0	2021-05-12T00:00:00Z	ftp://ftp.ncbi.nlm.nih.gov/genomes/all/GCA/018/346/775/GCA_018346775.1_ASM1834677v1
Fusarium graminearum	Eukaryota;Fungi;Ascomycetes	233423	SAMN03329223	PRJNA274567	Canada	GCA_000966635.1	Scaffold	36.4903	48.4	LAJZ01	869	0	2015-03-31T00:00:00Z	ftp://ftp.ncbi.nlm.nih.gov/genomes/all/GCA/000/966/635/GCA_000966635.1_Fus_gra_233423_v1
Fusarium graminearum	Eukaryota;Fungi;Ascomycetes	CBS 139514	SAMN16774463	PRJNA677929	Europe	GCA_018346795.1	Scaffold	35.9675	48.4	JADPPV01	1601	0	2021-05-12T00:00:00Z	ftp://ftp.ncbi.nlm.nih.gov/genomes/all/GCA/018/346/795/GCA_018346795.1_ASM1834679v1
Fusarium graminearum	Eukaryota;Fungi;Ascomycetes	CBS 119800	SAMN16774552	PRJNA677929	Europe	GCA_018345315.1	Scaffold	34.567	48.4	JADPNA01	2034	0	2021-05-12T00:00:00Z	ftp://ftp.ncbi.nlm.nih.gov/genomes/all/GCA/018/345/315/GCA_018345315.1_ASM1834531v1
Fusarium graminearum	Eukaryota;Fungi;Ascomycetes	CML3066	SAMEA3879006	PRJEB12819	Brazil	GCA_900073075.1	Chromosome	37.0088	47.9034		5	14187	2020-02-10T00:00:00Z	ftp://ftp.ncbi.nlm.nih.gov/genomes/all/GCA/900/073/075/GCA_900073075.1_CML3066.v2

## Sheet: Table S2
Table S2 Genome survey data produced by k-mer analysis of the FG-12 genome using Jellyfish software
GenomeScope version 1.0		k = 19
Property	Min	Max
Heterozygosity	0.000349589	0.000366634
Genome Haploid Length	40,132,609 bp	40,141,289 bp
Genome Repeat Length	4,080,272 bp	4,081,154 bp
Genome Unique Length	36,052,338 bp	36,060,134 bp
Model Fit	0.985289	0.989802
Read Error Rate	0.00275419	0.00275419

## Sheet: Table S3
Table S3. Summary statistics from protein annotation of the FG-12 genome
Database	Number	Percentage
EggNOG	8992	0.7211
GO	3565	0.2859
COG/KOG	8992	0.7211
KEGG Pathway	2662	0.2135

## Sheet: Table S4
Table S4 Summary statistics from non-coding RNA annotation of the FG-12 genome
Type	Number
tRNA	244
rRNA	70
snRNA	31
Other	9
Sum	354

## Sheet: Table S5
Table S5 Repetitive DNA profiles from the F. graminearum FG-12 genome and the M. oryzae genome.
Type	F. graminearum FG12			M. oryzae
	Copy number	Length/bp	Percentage	Copy number	Length/bp	Percentage
Retroelements	303	343994	0.0079	2091	3201358	0.078
SINEs:	40	4522	0.0004	37	7464	0.0002
LINEs:	-	-	0.0006	396	749627	0.0183
LTR elements:	263	339472	0.0068	1648	2444267	0.0596
Ty1/Copia	0	0	0.0021	304	525405	0.0128
Gypsy/DIRS1	263	339472	0.0047	1344	1918862	0.0468
DNA transposons	-	-	0.0001	528	692615	0.0169
hobo-Activator	-	-	0	-	-	-
Tc1-IS630-Pogo	-	-	0	492	687141	0.0167
PiggyBac	-	-	0	-	-	-
Tourist/Harbinger	-	-	0	3	170	0
Other(Mirage,P-element,Transib)	-	-	-	-	-	-
Unclassified:	1574	184287	0.0064	1282	404992	0.0099
Total interspersed repeats:		528281	0.0144		4298965	0.1048
Small RNA:	85	8303	0.0004	81	9605	0.0002
Satellites:	66	7914	0.0001	13	812	0
Simple repeats:	5690	229406	0.013	11827	443681	0.0108
Low complexity:	611	28533	0.0015	1536	68027	0.0017
Genome length	35897582			41027733
GC level	0.4802			0.5161
Bases masked	800180 (2.23%)			4818977 (11.75%)

## Sheet: Table S6
Table S6 Genes specific to the F. graminearum type strain PH-1
>FGRAMPH1_01T28129
MAAETPKLLWNPDNVKDVAESVGISSLNEEALKCLTQDVEYRVGQVIVEALRFMRASRRTTLTVNDISLALRALDVEPLYGYDSTRPLRYGEASLGPGQPLFYIEDEEVDFEKLINAPLPKVPRDMGFTAHWLAIEGVQPSIPQNPTTSESRSQELLPKGPGANPALSALAGNDNVSMKPSVKHIVSKELILYFDKIQAAVLDDNPDEEVVRLRQAALGSVRDDPGLHQLIPYFITFIMDRVTHHLDDTFTLKQMMELTNALIENKSLFLDPYASPLSAPALTCLMARKLGTEDGTDALKEQYELRQLAASLVGQIARKYSASNTLLRPKLTRTCLKYFLDPTKPPAVLYGAIHGLLEAGGPEAIRVLVLRNLKTFDSGILQPLREKMEGSMDYEMLVQ…
>FGRAMPH1_01T28131	-
MAGLHEPREDSLMQSDDSTCSASTDRTPDVIFLGIDLGTCYSGISYGRFDPQDLAFPRCWIHTATLGGVSGSRVQTRIPVNYYDKHFKGPFLEWFKMSLFRNEDLPDDVLRSSMFAELAILRKRLKVSAVTAMADYLKLLWSDFHGSLDYSISRQLARLSNILSDKVHLIPKFISDVEAASIALVLDLIKEHNGTTQMPRHGDVVVVCDCGSFTTESTTYKICPRKPLQMEEITRGECIHAGGALIDNAFMDILKAKIKKKHPRSIIDNSEEQLREIAYDYWEKDMKCNFSGDRREWTFEVPYGGGYTNTSLAISFNAFELALIFDPIVDKITSQIKGLFDHDSIRGTGWPMHQHVIIAGGFGCSPYVQTRIKQAVYKQTPSAIFRYPPGDQGYGVALY…
>FGRAMPH1_01T28133	+
MSIELPVKTLALRPNSIPSLAMALQSCRSGLLRSRQVVRTLMPCVRTYATDSTPESFKSENPSTSAPVPRWSQTPPAMKAPIQLDFAKNPENKVWSVNNDPKKLDEVYDRLLGQGGSKLLPEEVKWLAVTHKSFDQGRRGFNDRLALLGRMTLIMETTKTIVAKDPMSQPKKDKYNREPFTHPSLMSVDNLSTQGAKDIAGKSNLSALAADVGLIDVVRWKPRKVQKLKQSGVDVVLNGAIMAIIGAITLQHGGVVASQVIRERILPKLQEE*
>FGRAMPH1_01T28135	-
MPRQAPIHHFSYRSLIIPPILLAAATIVALFLHSDVNAALLWSQCHSHARIPGLSRIPAIGTPLCYLISFFRAALDSLRSTAVMAVVLSFLGGLLTVSTVEAARICNAPNVLIAYPTGPWLVFDLVGGAVVWELVIIPAFLHRARSVLNARQRDDGHGEVDQIFTSRHLPDSELMAIPISVAIGYFVPSILMLFKTTPTTVGVWLFFPIYVTIVRQIVRSVIAVIRRVSPTNIHLASNRRSFLFVYLLPIVCSILAHAFFMWSLTQPDDRKEMTRSTIVFIEVDTQFIFWTVLYWMLVEVGWRVPLATIVTSIVVGPGAGTCVGWMYREKLIHHDKEETDENDQPADEETPLLQ*
>FGRAMPH1_01T28137	-
MSIYSLSIKTIKYSIISMPKMSIFKQYSRAIRSWLSASPNGTIRKAALPPFTFLPQQQQVKCDKAKAAADEADQALHDLLKQTPCPKQPPAVSDAYLRAILQQQKLCNKRQEALQLDLERYQRALYEQALNKEPWT*
>FGRAMPH1_01T28139	+
MASHMLRPLASSAVPASASELCASSFFFQKQLKGYRLKDGRLSSRKQWHSTLKASSQRALVADVSKPLALIRHVSTPTPRNYSTVVLPKTTPYENLVVGVPTEIFPNERRVALTPANVAILKKKGFKQVLVERGAGVHADFLDAAYEKAGATLVDSPREVWSNSDIVLKVRGPGLEEVGSMKEGQTIISFLQPSQNKELVEKIAARKATSFAMDMIPRISRAQVFDALSSMANIAGYKAVLEASNVFGRFLTGQVTAAGKIPPCKVLVIGAGVAGLSAIATARRMGAIVRGFDTRPAAREQVQSLGAEFIEVELQEDGSGAGGYAKEMSKEFIEAEMKLFKDQAKEVDIIITTALIPGKPAPKLLKNDILDVMKPGSVIVDLAAEAGGNCEATKKGELA…
>FGRAMPH1_01T28141	-
MSTVGRTLTNLRKVGIKDYFKQMLYIGDTKAGVLIGTDRAGNKYFENNEELPLRTRWVEYAVHDYDAAHIEPGWHAWMSYSVDKPPTQDPLLNAGTRAFEPSRAIPNFTQTKGAFKTYNTAKPKMATWQPVAAPRE*
>FGRAMPH1_01T28143	+
MFARSCVRCTTTLRAARIRPRIPSGRVQTRQYAMPAGGASASNSNGAGALAPFVTELDRLAPSFDIRGEQIRIIQTPAQFYETLKERIRNAKRRIFLSTLYIGKSEKELIETLQESLRKNPDVKLSILTDALRGTREAPNPSSASLLAPLVEEFGANRVEIRMYHTPNLTGLRKKYIPTRINEGWGLQHMKLYGVDDEIIMSGANLSTDYFTNRQDRYHLFSSKEVTDHFWSIHSGVTSFSFLVQPSKEPAGFTLAWPENNSAPSPLEKPESFVKSTTSTLQTLLHPKSKPENDISDTRVYMLGQMSQVMKPDTSTELPIITHILKTLALPAYRDSSWTFTAGYFNPAPSLTKLLLGTASSSNTVITASPEANGFYKSKGVSGLLPDAYTLLARRFVHR…
>FGRAMPH1_01T28145	-
MAGKGIGCLAEAMGALRVSVKPATIPRAFTRSMATQVSSSDASTETTKDTSTTQTILGSWKPIETVPVTIHNFPSLEPTALERWSVDHLYLPLRRDLLHLAVVYEGDNTRQGTASTKTRFDVHGSHRKMRPQKGTGRARMGTKQSPILRGGGKTFGPHPRDFGTHLNRKVYDKAWRTALSYRYRQGDLIVCEDGMDLVLPTDYEMVAGKYLKDGLKEAYLKRYMTGVMSNLGLGRAAGRTLFVTGDRREALFDAMEQIPWDGRALGIEDVDVKDLLETGKVVLERSVLKELIEKHQSDLVSRVVMQGLVKGGPEAGTRVIGA*
>FGRAMPH1_01T28147	+
MRPISRQLRPQCPRIVRPFTSAAIRRTPAAETTAATATEADLDPNTVLPEFEEQLMKSGKMPIGSRRRRLAIRSTGDLPFEHLPYQAFQEARKILSVDREEKLGKIQKEIEKISRLEAKKPEDIKGGQHIKDMRLRGLRKYVEELKILADANDPVVKKRFEDGTGDMNKPIYRHYAEAKWRSYDQRLINQRIHQFSIVPDVLPKLEPTADVQLYFRQLKVPPGQIVDSIVSEKAPRLRVQVFDKGERLISIVVLDSDVPNPDSDTFNKRCHFLAANIPLSPNDTSLPLSRIKAEDQLALPWMPAFSQKGAPYHRLGIYLLEQEPGQKIDVAKLKKLYSNRDGFSLKSFRDKFNTTPFGFNMFRSVWDENTAAVMARSNIPGSDIEFRPTRVHSLKPPVK…
>FGRAMPH1_01T28149	-
MNRSTPNFGHEAQEFQDNYTLNGGQEDAIIDPLLKDCSPNATMNAGHSIDNQLFMNSDMWNPPLNNPVDFYPPAMSGMGHTNLTNSPIQPSDTHSSPETPFNGFAFAASRTSSKSSVPSAKSPDADVKPRRSSRTTKTRPQQLSTETATKPSHQRRASKAITVKTGPGEEEGQDEDEDEELDESAKREKFLKRNRIAASKCRQKKKQQNEALEEHLCRLEIEKELLHKQCNGLVDELSAIKNQLMEHASCNDANINQWLDNEAKKFVQRIASQSKAQIPPHQNTGDCCDMHRRSSSVARSIKSDINFDHMPDSMINSNP*
>FGRAMPH1_01T28151	+
MSEQLSTPRITAAYLDNFVGRVVMLVGEVTQLRGDQATVESDGTVTVLLNRDAHLSNGNYVQVIGKVNPDLSIKVLTSRDLGNSVDFAMYSSVVQATHKYQSIFTGN*
>FGRAMPH1_01T28153	-
MDNFYHPASLGHYSAPVNIPQHRLAPSRSNLSLQATIRHTADQGPVHTSKTWTNSSGDHNILNDTDELDDRANFVQEYNRLAKKNGVRILVIDDFDFRGKGFNSPRKQGWLYRILRSSSNQNGPDTLPPTQGPRHKRSVSDLAHNLVHRRETPKMIDLQSMIRISGKSMFYLPVEHAPSALILPTCLRATAHHIAQHVTTRGIFRIPGSIRVVNMLFDYYCSTEYGQVDVTSTTVRCANLPMHVQASVHDVASTFKRLLSVIPGGILGSLSLFDAFVAIHSQLQGDPEFPRTKHTKVRARLIALAIATVESQFRRELICAVFGLLSLIGRVAEITPREDEEGRPLPTGDLMGYNALGIVFGPLLLGDLLGLYSMKLATPKAGLLVLPLRSPRSRQDRRI…
>FGRAMPH1_01T28155	-
MEGNPEPEPVRGEPPHETEAKAPADINLPSEPLGTQGQLETGETPVEDPAQEQVKSWIESQTETEPQQPPIESSTVDAEGDDTAGELPRVEADAPSTETEVPGMTGTAAESASTTASAPPQGTDATAPPAGVGVVTGPALITPRRRAASASTGPSSSTSAAGHGHVPHFVAPSSYLRRRTSIRSPMAPTEPKPLSPLDRDQLQGLNAIRDFLRVRTSYDVLPLSFRLIVLDNELLIKKAINILTQNSIVSAPLWNSKTSRFAGILTSTDFINVIQYYCQYPDEFHKLDQFRLSSLRDIEKSIGAIPIETVSVHPSKPLYEACRRMLKTRARRIPLVDVDSETNKEMVVSVITQYRILKFIAVNNEHNTVLLKKTVREIGLGTYSGIATAKMNSSVLDVV…
>FGRAMPH1_01T28157	+
MGICSSTCCGGRARDGLYEPVLADSEREAVADLLQYLENRGETDFFSGEPLRALSTLVFSENIDLQRSASLTFAEITERDVREVDRDTLEPILFLLQSPDIEVQRAASAALGNLAVDTENKVLIVQLGGLTPLIRQMMSPNVEVQCNAVGCITNLATHEENKAKIARSGALGPLTRLAKSRDMRVQRNATGALLNMTHSDENRQQLVNAGAIPVLVQLLSSPDVDVQYYCTTALSNIAVDASNRRKLAQSEPKLVQSLVNLMDSTSPKVQCQAALALRNLASDEKYQLDIVRANGLHPLLRLLQSSYLPLILSAVACIRNISIHPMNESPIIETNFLKPLVDLLGSTDNEEIQCHAISTLRNLAASSDRNKALVLDAGAVQKCKQLVLDVPITVQSEMT…
>FGRAMPH1_01T28159	-
MMASFHFARHPVRTTVSFVKAACLVHLGITYGYTVSPAQGPSMLPTFTVDGDWILCDHTRRYGRGVSVGDLVVYRIPIFNNQWGVKRVTGMPGDYVSVGTPGEQGEDLMIQIPEGHCWISGDNLPASRDSRHFGPLPLALISGTTIAKILPWNERQWMKTGLEKVDELD*
>FGRAMPH1_01T28161	-
MAKKRAISIHSRAARRATDIDIDTDKSLKEVQPPPRDAPHRPSVLAAQHSAGISKKAKRGRKDKMSAKARQRHEKGLEMAAAVAERTQNKIEKSKGRSRNIQTRAKNWEEINRAAEEAERAAEEADKARDIADEKAKKDEDDEDMDGADEKTLTAPVTDDSAAISADPIQADEDGDEIL*
>FGRAMPH1_01T28163	+
MSSFPCLQSSRRALYRVFVEREALTRQFIPAQRILPVYHNRRFSVSPLQLKGKVRRGKAGQDDFETEPSDEENKTFDRRYTTKEDFIKSGRDRLPIDFEITDPKIMVLDNGVLDGPLFTRNVMSRIDTSTDSLRMATPYIPADPKNNKPVQYALCKIVNKREEYERQRELQQRRRVSKQTSSKMKEIEMSWAIDENDLKIKTKQLIGFLSKGWKVEVIMGFKKKGQKRRTSEDTAEEAYVKVQNLVKELGTKEYKPREGEVGRTMRFYLEGIDKELNTERQAEAAKEQPATTTEVEQEDSPVQKEA*
>FGRAMPH1_01T28165	+
MLPITTCFVAGLQYLLHPVKLGTIQETINPDALIPVTLLTTDEIFGDIEGVLNLFDSADDVFVPDFGSILVEKTGSNTSHVQDARQVYHLDLIKTLEGFSELPSGPYFLHGPNLHQAWRLYDDEFGAFTFGVIPDDSDKPDEYQPLTSSSLQGDSVTVPVPSRLYYPQPSLRKPLSGVRVSVGDTVSLKGTHTTFSSRAWKSLYKDPSSVTANYAQELLDQGAIIVGKTKTAQFGTGADWVDQQAPWSARGDGYQRMQGSSIGAASALVGYEWLDRSIGVDDGRVVAENGIYSLIRPANISSGDVKTLSKFDGMRFFSRSMKGLLHHAPSHKLDARGDSVAPKVIIPVDLSSPGETQKAAIDKFVSIIEEHLDAKAEYIDVSKIWEENPPVEASNDGMQ…
>FGRAMPH1_01T28167	+
MAEPANTPVPASTPRATSPAPHQSLFSQSGSFLSPKLSMPPSKPRVLHIGDPVKYNPETFLRFSIQCEIVRPSAEERQRPEFIKALEDKRWGDFDAIFRPFWSTGGEMGKWDAELISLLPESVKVFASAGAGFDWADTKLLGERGIIYCNSGLAAAEAVADFAMASIISTFRVLPWCISSAMSGDEEAFSTNHRDATMQSRNLRNQALGLIGFGNIGQQIAARARHGFGMDVHYYDILPKPSSVVAPLRATHHETLESLLAKCDCVVLCTPAGDGTLINATTLPLFKRGSRFVNIARGSLVDEEALIAALRDGTLSNAAIDVHTNEPKIHPGLIELARQGRVLLTCHNAGGTVDTHKGFEELSMRNIMAVLSGGEAITPVNLQFLK*
>FGRAMPH1_01T28169	-
MANTSSDLGARLASVLPKGHKFTTLHISTPPTKTDPLYSPPPNERPERTYCENHFLAVSIDAPKEQGKQVLVLGIEVFIYTTARSTTLFVSKADSTGYLALLDLPKGTPSPIREICATFVGFLVEKRRRKGIQFVVNLFARAQDQYLFPGSVDNEGKHVLDDRGLIKWWCRVLDPLLGPAPKSTDAPWKSANGYIVVPGLETHETRALTPRKADSAWEFTHPLERISHYYREFDWVPPRCLIPHFPDDPKSRFRDELDEEAASSQAMKNQGSWKSVKTLDMFWEMMAYRQECSSGRMTGFIWLVFDDQEPASKLDDSQSTAPPETPKKQRIVQITPTTTPRKLFPSKEKKDSRIKKKKTKKTLKGPIIARAPRIKRAKHNYLLDRPANTAYYSWTPQGR…
>FGRAMPH1_01T28171	-
MEKQPKRERSRVAQREYRKRHASRFNTLKDENQRLRNALKRIEKLAQKRGGKDQELETALAEARETVGDEDTSDGNGQRATSSSSGTSDPITSERASDISELLSSDIHLHTQALGQDTAQKLGLAQPLWTDIDHLARIFEAPSDARRYLGEGLYTFAGSLYWACTRNTVSLWETHKLNMLGKPGPPDMNPMDRLFNHSKHLTDRRFMLSLALARLEYKQKGFIEHPHAGTEMIYRSVLPELRKKMEQELVAKGQGMEWWKTPREVENHLMKYLEPSEVDELQALIEGRGTAAVLTKYKPLMDMMIDEFVCFADGPRWNLIHVAMAVGSWRKDHPRPSEMGIGV*
>FGRAMPH1_01T28173	+
MLSPIHKTTYPAISPLRPELSTKGKNALITGGGSGIGASIAKSFAKSGVTNLALLGRTGKTLLANKAEIEDKHPQTKVWTYIVDISDSDSTRYALEAYAKAVNGKIDILIANTGYMPKAERITVADPDDWWSGFEINTKGNFNLLRAFDPLAAPGARVIHVSSRSTYIEYLEGFSGYRASKLAAYKLFSWYANENPDKVVHQFDPGFIFDTGMTAPFEGLIKEKGLVGDDVELPSDFSVWLASNEANFLSGRFVECAWDVGDLKAAKEDLKASWNKWTIGLLL*
>FGRAMPH1_01T28175	-
MQSLLLSLIITSLTLKMVQTRKKTLVHKAKRRSAKRRETKKLLSRIRVQVPRRQVNWEGAGKFATLHQVLAWSRGLVAEGEEQVSHLCGKPACLIAEHVVIKNATQNNGRKGCGITVPCPHGDSCPLWITTCRHNPPCNMGNPGTLWVKMGFEVFDKPDATWYEQPSAHSPKQQYDSWSKWRKIMQNHKSILQKRLSTDKRDEISSVYPLLTGNSMDVLALTHFARRYTTLKDDDADADVALPACDTVPMVLSVESRQKLWDAFDTILQGHAREYSRGGTSASKNGKVK*
>FGRAMPH1_01T28177	-
MVDERDLVVEASEQPVQVRLPKAYAGGLASEFEDLPEAQVLQMTVELTTGDEQVDDLLKSLRTLDEQSRSASHQNTTYRDKQQVGSLNSTAFKMPTKRQNTARDESDRERQRNMTEFFGVDSAPEQPPSPALTTAINNTRRAQGPGQRHHPHDMEAPGQRIYRQVFGRRTSLAVYPHRREGARLLAARLALEECINTEHICVESKSSNEARKACRDHGPGQH*
>FGRAMPH1_01T28179	+
MERTSKYSMLRKELSMMYYEYGKCSLLKRVWSRYHQCSYSQRSHVLSVDALLLHKVSFTAYNGVNVTPGNHISYLYHNRACFNPLHLVEETAQQNNARKGCTGPLFCPDHGHLIWNPCELNNHHSACIAPRRVGVFCYLSTLDQPV*
>FGRAMPH1_01T28181	+
MVASNARKRRTEKAMGTVKLISLCKDRMSTAFVDMRGLKKLQIDSRHKNK*
>FGRAMPH1_01T28183	-
MAAAGGLDSPGPELSNDHDSINVNPAGSPPGQLPPLNDYTIKKNEVEEKENIINETPSEDETAEEPSNKGSFTIDPEGELTHDQTTVDIVTVPCPGANPLRTWSRDGRMGRFFGALSMRDAEGQTAPDPDRPAPSWVRQGIRREADRARILLYEHPSTTEGMRLSTLVDALLEELEELRKREKQARPIVFVGHSIGGIIAKMVLTKASRDARYEDIYRQCYGIAFFGTPHQGSSYLAMPNLATGIQSLLQLSAPLPCSITDDLRVGNPLLLQLDDDFKSIAHDFRIWTLYETIDSRLSGSTGDVYFTAPLTSIKSAILGMRQETILPLQSDHANIASFGRSNVHTMRLFMKQLSSLIDRADEYSCEDRNWTLDLEQKVNVEIHGFFEDSPGPLDSATIR…
>FGRAMPH1_01T28185	-
MLDSFGVAIFSPEEIKKPKRLEQINPRWGTDNNPKESDPEPARVVSDIQNDGALKTPAAGLSSMLASNPKIKAAQSEWEKKKQPQSQLYIPDTSRVPGMIIPTEYSSYKNPSGKPPQPHRKRDSPASGIAVPAAKRQNSDVDVAQARQDALRRDALRFTEEEVARQMSELGNNMSTIKTNAIPQATHIATPGELLKKYVGKKSVPTPVPTPVQATSTQAQHLPVIGDTTVAITIAEGNRLYTTYHHPDEGPISGRGAVIPPKYKLHHDPQLQYICPVRDCRRLFKGLNGLGGHFSASHNSTTFNDNGDGTLSKVGNYAKNGGPGGTPGIVVSRNPLPPGAPPPVNPGLPVNAPPKNRVSPPEQSSKPIRWQETPVLPPAPLVRSNTSGSDVKSFLHRYL…
>FGRAMPH1_01T28187	-
MRFLTIQRPILAAVAGLARPAFTPVAPLGVQLANSLVQGQRFASVKSQGAYKKKPKRGIPKKLGAKRTGDQFVIPGNILYKQRGTLWWPGENCIMGRDHTIHSMATGYVKYYRDPARHPDRKYIGVVFDKNDTLPYPQHAERKRKLGMTVFPIKEAAAKPEISPSGIPFQVTRIEAGEPDRLLKLRKDYSYREDNWAIGKLARTTGLKTKRFRTRKQWFRHRRWRRERELEGQRKAEQKRAESGGEIKAVKMISKKQAKKAAKKAGKKK*
>FGRAMPH1_01T28189	+
MRYIIAFLSLLTLVNGQFGGFFDQMFNQQGGHERHQAQSQNNPSDANHYKQNYENSVCDKYLCPDTLACVHFPHHCPCAWDAQQEKVELAEGQRICVSRGGFRPGETARKIELARKGLL*
>FGRAMPH1_01T28191	-
MASAVESPPAHSPPTNPPQRPRGILKNSYRKSPPASPEQEQAASEKELTIANTHINAGHRRSSSGARPTGSRRQSGVNSSSDGLEQSQRLKWDEANLYLTEQERSSTMKITEPKTPYAKHYDPAEDPSDDEDPLADAGARLKDSRPRREDDIPGLSLGEPEEEIPEAGAPSPRSEKSVHVDDESSIGHDAEEDLAGMSPEEREKHRKFEQLRKRHYEMKNVAQLLGHPDDLPEDEDEDESVPPMPKVPQVPNGSS*
>FGRAMPH1_01T28193	-
MSQNPTEETPHVSGQSNTPMSAPAHALTYEQVAKELNANLEDGLTDQEAKGRLETAGRNEFGEQEGVQPLKIFIGQIANALTLVLILAMAASFGIQSWIEGGVVAAVIILNIVVGFLQEFQAAKTMDSLRSLSSPTASAVRNGNNQTIPTAEIVPGDMVELKTGDTIPADLRLVEAVNFETNEALLTGESLPVRKEINKVFDSDTGPGDRLNVAYSSSTVTKGRARGIVFATGIYTEIGQIAVALRGKSSKRRQPKKNAEGKVNAGRHIEAWTLTGSDAVGRFLGVNVGTPLQRKLSKLALVLLGTAIVCAIIVMAANDFKSQKEVIIYAVATGLSMIPASLIVVLTITMAAGTKRMVQRNVIVRNLKSLEALGAVTNICSDKTGTLTQGTMIVKKAWI…
>FGRAMPH1_01T28195	+
MTQKRKRTGAHPPPPIPDMPDTVPRRSSRRLKESTDERTPKIDITKMASNPMKLTNTKKVKAVWDTGEGVEEAMRELSEMEHKLQDAVRTQRLAVESSDLHVKKEIAQEPSIRPKVNAPNNNNTVAARGKLNGKPKAVETAPQDEHDAELATDDMAEAKEENGVNRGANRPPPVNSDTLPLPWKGRLGYACLNTYLRNATPAVFSSRTCRISSIIEHRHPLANPDEPEHATKNRPDKSQPADNERGLKYVQELGLANARDIVKMIRWNAKYGIKFMRLSSEMFPFASHQEYGYKLAPFASEVLAEAGKVAGELNHRLTTHPGQFTQIGSPRKEVVTAAIRDLEYHDEMLSLLKLPEQLNRDAVMILHMGGTYGDKAATLDRFRENYARLSDSVKRRLVL…
>FGRAMPH1_01T28197	+
MEPVGIILLVLFLFIIVMGPIACVRINVRRNAAEMVHNPQPHQMDTARRKLSTVTTSTILPRPNDAPPTDIEAPIPPTEFGECPICIGPLVPEPTYTVTQDPRPVLEQVSTVTSHETTSQAKSQATAGQTEEVNDTNDDVMTINACGHSFHSKCLSSWFLIDRYDCPVCRVPYYKGMPRHQQSLNVSPFW*
>FGRAMPH1_01T28199	+
MNSTFFDGASEKFLQWFKTLSGSTFSDDIKIVDLRDRNAGRGIIALKDIPAETTLFTIPRKGIINTETSELPKKIPDVFDLDKPDEDDVPGLDSWSSLILIMIYEYLQGDSSQWKSYFDVLPSSFDTPMFWSENELDQLQASHMRHKIGKADAEDMFKKTLVPIIRSNPSIFNAENRSDYELVEIAHRMGSTIMAYAFDLENDEEEEEETEEWVEDREGKSMMGMVPMADILNADAEFNAHVNHEEESLTVTSLRPIKAGEEILNYYGPHPNSELLRRYGYVTEKHSRYDVVEIPWDIVESVLTNFGISSKILEQIRGEFEEEEEFEDTFVLERDTGEVNSDGTFAEPAKFEGMPEDLQEQLKSFLKGIKKLQSDTIPDKRKRDEIHQAVLVKTLEALA…
>FGRAMPH1_01T28201	-
MASALFFLDLKGKTLLARNYRGDIPMSAVEKFPVLLSEAEEDSSAVPPCFSHEGINYLYIRHNNLYLLALTKRNTNAAEILLFLHKVVEVFTEYFKALEEESIRDNFVIIYELLDEMMDFGYPQTTESKILQEYITQESHKLEIQARPPIAVTNAVSWRSEGIRYRKNEVFLDVVESLNLLVSANGNVLRSEILGAIKMKCYLSGMPELRLGLNDKVMFETTGRATRGKAIEMEDVKFHQCVRLSRFENDRTISFIPPDGEFELMSYRLNTQVKPLIWVECVVESHSGSRIEYMLKARAQFKRRSTANNVEIVVPVPDDADSPRFRTNIGSVHYAPEQSAIVWKIKQFGGGKEFLMRAELGLPSVRGDDEQGGGMMGGFGGSMGGVGGVGKGAKRPIQV…
>FGRAMPH1_01T28203	+
MRYRNGDVTEAPDFYWLRDTNSGPHGQLLRLDGQGGHVLDQSNMIYTGDEYKTFGVVACNPLLPIMVAEHDPLVSSGHWDLLRIFHPTNRPGLSQVATDNSRMGAGGGPVPYVAGSSPSWMPGLVPRTYRSPRSGAPRSAGLGGELPIILGLMALNAPREPGNTSVHNVFLGHNRIWRHGQWISTDAPRGRECSSLDH*
>FGRAMPH1_01T28205	-
MHLGYSLPRSRHARRSRLSVCDTKRAEIATFTMSEPVSRSKARRPSTMILGSSPQQKAMAQSECHLDKPPTMKHSDPSQVCNGPAMNVPCYKSLYNSD*
>FGRAMPH1_01T28207	+
MERNHMLPSDRETESRHPLGPPPARPSPSLMALSPPAYSNLALPSPRDFPDVPATDPSTFLPPLARVGADNDIKLPSISSLRSEMALEPPRTWGPLPPMPPNHAMPMGLPSIDSPTRMDLDASSNSVISAASPDRLLDARAGSVSLDDPDVRLAAEALGDLRADFISSPPHTNSSLPVSPPSHGLHNGSQPPQPEPLLSLLTTTHPLLASTIEGATSAYGGAKNFSPRFRSGAEYVEGYLTPIANTVGSVGRVTGVEGGVRWFLGAGRRQNSSTSDLETGNSKKRRKVDSEDEAVSNKRFESEGMQQISDEQLDDAFSPSSRTLSRRMSTTSTVDTLPAYDEMRSPAYTETDAQDSPRSTPRPNSAWQSRLIMSTSGLSVAMSDESLRSLKYCLQWLRW…
>FGRAMPH1_01T28209	+
MGYPDTFEGFCVDSPKSWNKFEKQTLTPKTWGDRDIDVEIECCGVCGSDVHTVTGGWGDFEGPLCVGHEVVGKAVRVGDKVSEIKVGDRVGVGAQVSSCLKCKLCNNKNENYCPDMVDTYNCKYPDGSVAHGGFASHIRAHEYFTFKIPDALKSEQVAPLLCAGITTYSPLVRAGVGPGKVVAVLGIGGLGHMGVQWAKALGAEVYAMTHSPSKVEDAKKLGAKEVIVTSEEGWADKYKFTFDFILNCADMTHKFDMNAYMGTLNIGGEFHNVGLPDEPLPQFTAGTFAGNAGKITGSHLGNNQEMNAMLKLAAEKNIVAWVETIDISEKGCAEAIERVKENKVRYRFTLTGFEKVFKKD*
>FGRAMPH1_01T28211	-
MAPKVLVVLTSQSKMNNGNPTGWYLPELAHPYYDLVNAGVEITVASPAGGEAPLDQGSVQMFKEDEESVKFLNEKKQVWEQTTPLKEFLGKSSEFDAIFYPGGHGPMFDLVNDETSIKLIEEFYKAGKPVASVCHGPIVFTQVKIDGKPLLEGREATGFSNSEEDAVGLTSAMPVLLEDEIKRVGGKYVKADDWAEKLAVDGQIITGQNPASAHAVGKAILKAIGA*
>FGRAMPH1_01T28213	-
MKLQLSLLGLVVLAFAKPQDPSDPAPAPPVSSAPAEPPAPVPLPSSQPTPPTSPVPAPPADPAPAPPPADPTAAPTPEGPICECGYTYCAEVLKAMPGMYLYYTVKDNTNIPPSDKPWSDDQLSSAYCKTPNAVCNGQSPASKVDNALFICLCAQPDQKVGDHIELLCGCDTCLNVGPDFRGRCKSPCRAGHGKGGSGGGKGGGKIRGNNRMGFW*
>FGRAMPH1_01T28215	-
MPTGTKLESLISLHHTSQSTTTMASIARSLRFAAPLTRGIAPRAPIARPIRAFSSTKLSLARKYTKDHEWIDLSADKKHGFVGISEYAAEQLGDVVYVELPEAGQWVEQGDAVGAVESVKSASDINAPVRLRVVQVNDNLEEKPSTINKVPEDDSAGGGWIAKVEVDEEGAKQFEKLLDAEAYKTFAGAD*
>FGRAMPH1_01T28217	+
MAETQYPKGVVNVGTRKSPLALAQTQIVVDALKQRFPDHDFPIHSMTTTGDRDQNTALYNFGGKGLWTSQLEERLVNRELDIVVHSLKDMPTVLPEGCVLGCVTSREDPRDTLVIKKELQDKHGWKTLADLPAGSIIGTSSVRRIAQLVRRYPTLKFKDHRGNIQTRLRKLEEDPDLTGIILAAAGLQRMDLGHHITQFLESENGGILYAVGQGALGVECRGDDEKVLGFLKTIENEQTALACEAERALMRALEGGCSVPIGVETKWIDDKLRMKATVVSLRGDEGVDCEIAEAIKTHDEADKFGKKVAETLVEQGAQKILDAINETRQVPETVK*
>FGRAMPH1_01T28219	+
METEIPPHEVPLPIQAQDDTMGGIEESPHPGSSNGFHHQQSTSFDQGLASPQRDDPSSRYTPPVQPAPPLSRPASGLSNPAHQAYNDYRQGAGEPSSNGRNHVVIKVGMVGDAQIGKTSLMVKYVEGSWDEDYIQTLGVNFMEKTISIRNTEITFSIWDLGGQREFVNMLPLVCNDAVAILFMFDLTRKSTLNSIKEWYRQGRGFNKTAIPILVGTKYDHFVNFPPQDQEEISNQARRFAKAMRAALIFSSTSHSINVQKACPKVPPDINP*
>FGRAMPH1_01T28221	-
MLRCLPWRKPVSNDGKELQRGMLVEVVRIHKDGEEVYSKENAPPHKQLYDHPSFPLSERRLITPSKTTNEDSTRNSQTPRKSIRQLRAELIQGFNQVEKLFD*
>FGRAMPH1_01T28223	-
MSNRTYLPFSPFAWPIVRRDGPPEQSMTDKAVTIAIVCGISALFLAPLVWYVTARTVTVRREKAKKTSGDVEQGVY*
>FGRAMPH1_01T28225	-
MPSNYERLSRPSGDTTLAVPEKAASTTLTVNETPRVSTTSTPQTDKLNPFDTDIEAMVTNTRTESNMHKTSSSPLARKTDCQVWPGKDHWKQQAKAAKAKNRCTCMAHLSKRNRWIVKGLIILLVVGIAVGVGFGVSKPLNAPIWGDKDDK*
>FGRAMPH1_01T28227	-
MSGGSRSRDGCFNCRKRKRRCDEEKPICQRCRKIGDDCVFPSSSNVFKFVVVAPSDHYMIPITQNISFLNLSTQELVSIYNSQGGVVQRSLPRVLSPFPHKITGIENALVQYYVEVISTSRVYVDTTRNGFRTSVIPRMFYQHSLLYAVLSMSAAEWSQNGSPDYSGLSMQYKVQALHQLQQALLDSQDSEGNLLTCVLLSSLEIAHGSSMWLHHLQGALALLESFGASIDSDVAEFVLQYFRFRYILMETTQPTHDDTVSQAMASLTRIEASLSNDRNLVDEQIGCSMELVDIINEISSLAYISKDQLYTKGQEIEQRIEEPLQDSADYYLSRSAESFRIAAQIYLRFVCYDTSIAHPSILELHEQLLLCLSSIIVKGQTRRSFPMWPLFLAGCACSS…
>FGRAMPH1_01T28229	-
MATQLLMLDILCLLDIFAVAHCSTCYVVALGFVTVEEKPLLSIPPHSSGKNLALNIGTLLRQILGAHGVVNTGNALLNNGTLIQISSNKVSGGTDNLDTTLVSLVVRLGSLERRQETVVDVDDASRHGLAQCRRENLHVTSQDNKFNAVLLAELKNLSLLLSLGILCHGEMVELNSVALGEGGVLGVVGNNNGNLHAKLASLHAEEKIVETVTNLGDHDEDSGLAGNGTNIVFHLVLGGELVKSFSEVLGRFGLGRTKVNSHKETLRDGIGELLEVENVVLVVGKDTSHGINNAGLVGARQSEDVIVGHVEGLLVC*
>FGRAMPH1_01T28231	+
MANDHILTLSCPDKSGIVYAVTGIFADNKHNILDLQQFSDPVSERFFMRVHFGPTETESTEHLTEAFDKLAAEYKMEYDIRPVARKTRVLIMVSKIGHCLNDLLFRMKTGQLRMEVPVIVSNHPEYAALAESYGIEFHHLPVTKDTKAQQEGQVLELCKKHSIELIVLARYMQVLSPTLCEAMSGRIINIHHSFLPSFKGAKPYHQAYERGVKIIGATAHFVTADLDEGPIIEQRIARVDHAMSPKDLSEEGSNVESQVLAAAVRWYAEKRLFLNGHKTVVFN*
>FGRAMPH1_01T28233	-
MSSTTDLATAAIASNAQDDSGNRGAFIVLEGLDRSGKTTQVKLLEQRFVEEGKKVKVMRFPDRTTPIGQMIDNYLKSNVEMDDHVIHLLFSANRWEAVKQIQSLLASGTTILCDRYYHSGIVYSAAKQNPSLTLPWARAPERGLPRPDLVLFLDLTEEQAQARGGWGGEVYERSGMQKRVRELFWGLSMGGKDIAAQGLGLDEGEGWTQEEEDLVVVDAGGSVEEVNEEVWKKVRARVEQVERGEVGRSVRVVR*
>FGRAMPH1_01T28235	-
MATVTRQPFAPLDGSRLQSLTSIKNRQNAIAPPTASKGKRKADLIDTDDFENVDPSAFAKRSKGSKDLTRDILKPSAFHLKTPSLPTLPALSAPSPIPSRLSPTKSRRTLQVKSPAKTNSGISKSTPVHAPAGRSPTRTTKRSGLGPSRRRTLGRIDPPTLLGAAAPFSLDAALKGTIPGYAAKPAPKEPVLPDMKASWFFEIHEDTPEQEMTNLLQHSTCTLDISSDEESERKRNRDRAEGRDKENVPPPDDVSQTRRSPRADDMMVEKERVALGEMSPADFYAEGCDETSVIIVPADEPESSVVESNVPELSTIPESNLESLESSSLPELEAVATQEDIDSLMAKPTEGTSKAAVLEPIEGTGESFELWESGSAHDEDATS*
>FGRAMPH1_01T28237	-
MVSSSTISFTDPPAFPPQTRPADKRTTFEKTQRHLRDSGETLEVSNLSHLLESVLSVCFLLPSSLVYGGFITDLRGDVRQFYGIDGNDNRDCFAGCCKPCCTLIRVENEIIGREKCRKPSDSSGYTSQPPMSSSSSSSSSASNVGIKSPCSSSESDECLPCIPEDQSEKSPSTRNSRRSSKNRQRSIALDPVAPTDATLVHDHDLDKDPTGPTPHLHDHDLDRDPKGPTPHLHDHDLGQDPKGPTLHLHGNHRLSKDVTTTASYPPSIHQLRTDTKASASPPAILRHDLFDDATTSTIQHSKHDLGFDQVNTYRASPEHQIHQDEIVPGAFPSSSHDLGQDLASDQARSAHPHGLGEDDEVTRRPTNHGLHHLHEGK*
>FGRAMPH1_01T28239	-
MWNATGPDSNRNAPPGVVPDYNHPEDVYWTLNIVLAVICVFFTTTFFLVRVYVKRTISRNIGVEDCLCNYVLYNGFNEYIVARYGAGYHAWEIRKPEYYNWLKWFYASTVVYIPASFFTKATILLLMARVFAVEPRVSKGIRIFIWALLVAYVPIQILRIVNCYPIRTYWDPKVHNAHCLNQRKIFFSDLSLSIVTDLIILLVPIPLTCRLNLSVGKRIKIVLLLGAGGIATALTLFRVVKAVDFLNSDDITVDYTPIAILTNLEITIGFVCACLPSLNMLIEHHIRRRRRQRETQTDRRDRSRASMIKRHFRWMSSTTHASPPPSRPPNRASGGMIDLDVEMAMLTGQPVQLRSERLSSTESIGLRPLGHRLNSGDGRREGWLSQDQDDQDELHDSKF…
>FGRAMPH1_01T28241	-
MGYLYLRRGSRQRVVLLAIGILVSFGLIMHTWPFYSSSTRFKSSFSTLPIERAGNTSELMHHLWEPFLHDINATHFVTREGYQYTIGERNHRWREPLKKKLLILDVDTRLDTGAGTLLNKSPLNPSELTGRSGGMMNHYLYAMIHGYDYQFIRAPNYYKRHGTWVKVPMIKQALGTYETVVFLDTDAVFVYPEIPFEWLMSLWNITDETLVAMSNDPDSPRNRDGKGLVMMNTGFIIARQSTRTLSLFHDWNQCPTETKYEGCKRWMKDWAHEQAAFSNHVRYDYSTDDVRAIPRKDGNGGDGVFIRHNWFHKDSPAKDLRQLLLDILVKRIQAGFHHDLDNFLDASHYTHRFNKLDSM*
>FGRAMPH1_01T28243	+
MVILQSSTRSLRICSFIGLSILILYIFVIFVSYSQGYRPLQLQITDTAKSNYHEEIHTDGPDQNGIINRQTDLQLLLAELWKPLIHPIDDRIFVTDKGERFEVPTSQMRWKKPLGKKVILIDTDTRLNTTEENTILDKRPLHFPTLHGRTGGHLNHYLYAMIHGYDYRLVRAADYPDRHGTWVKPAIAKEALKTHDFVISLDSDAVFTHLNLPIEWLMNLWDIRPEETLVAMAYDLDIKIDYDTRGNLVLNTGFVISQASQRTQEMYERWEDCPRSIPGCEHWNFKWAHEQSAFSHYIRYEFNRTHDVKNIPCSHANGNEFTAEGQCKCQGIFVSHNWKSKQRTPELLSRSVMTSLARRIHGQFQDNIHDLYTDSSDKTYPLEDIGI*
>FGRAMPH1_01T28245	+
MTASTLHHITIELLGSSTNVRELTDNEAKAFESYVSRDKTEGFRVLTLTPTTDKACGPRINGFGTSFHGVNATVDGYVNQETQICGVASLSEIFRRKDFTILPETFGYGEVHKWDISQYRKQVPNLRGIAFSPRVRFENANERDTALTQMHVQDVWDFNDALEDVAEMELPCLIWRVGEEPAEKTTQFVCLLEPDKIFRPHHWRAARRALHGDAIKLEVTFKPSKDVPWSVSWEASHLTFASSDHLRGVDLKRRLPLLLKRPEDNSRSHKFCPFSYPKYEGTGDDLKRRTVVFHCHLNLHSESLRVFAINHLSSPKISPSTMEADPRASSKQAIFNELLIGQGLWSLQKQGVNVELPSFDIFDGIPVDVRDACLKHVFENDKERVRRYFGKLHLGLGLV…
>FGRAMPH1_01T28247	-
MGRHNLQYPKDSINTIKRYKVHGVYDLETVHTIVNTCPILHVSFNSPSQPFPIVLPMIGQLGSFERPSADLGDPLELYLHGYVSSRIMNLAQSSTVDGEEVQGMPVCVAASHVDGLVLTLATFSHNYNYRSAMLFGYATTVKSDEEKLYAMELISNSVVTDRWRHTRQPPLASEMQSTNILKVKIVSASAKISAGSTTDDKSDMENNELVTSTWTGVLPVYQTIGDPIPGPYNTAQVPDHVNNFVADTNDERKQRSLRAAEGERRAS*
>FGRAMPH1_01T28249	+
MVLQDLGRRINAAVTNLTREQNLDEKAFDGMLKEICAALLEADVNVKLVGQLRKSIKTTVNFKELPPAVNKKRLIQKAVFDELVKLVDPHAEPFRPKKGKSNVIMFVGLQGAGKTTTCTKLARHYQSRGFKACLVCADTFRAGAFDQLKQNATKAKIPYYGSLTETDPAEVARAGVDQFKKERFEVIIVDTSGRHRQESALFQEMVDIQEAIKPDETIMVLDASIGQQAESQAKAFKEAADFGAIIITKTDGHAHGGGAISAVAATHTPIVFIGTGEHMLDFEKFAPQQFVQKLLGMGDMAGLMEHVQSLNLNQKDTIKHIQEGIFTVRDLRDQLSNIMKMGPLSKMAGMIPGMSNMMQGMDDEEGGAKLKRMIYICDSMTDKELDSDGKILIDQPTRM…
>FGRAMPH1_01T28251	+
MATRTSLRHLGCVPRHLFTFRRYISTRDMTATDLKKLKVDQSRLMEALHDTCKWGTGLKWGDKPTDTGMSRLALSDSDKQVRDWFVKTTEDLGCKVTTDSMGNIFAVRPGRKEGPPTLAGSHLDTQPSGGRYDGILGVHAGIEMLKVLQEHDVETEYPVGVVNWTNEEGARFPISMMASGVWAESITQERAHSLKEVAGNATVKSELERIGYLGETPASYKSSPIGAHFELHIEQGPILERAQKKIGVVQGVQAYKWFTIDITGRDAHTGSTPFSDRADALLLAARLITHSHRLATKHKALTSTGILNLTPGSTNTIPGHVSFSLDIRSPSNEIVEELEKDLRRDFDLLASGTDVDGLLAGSTPALPLSLTWRTDTISTATKFHPDCIQAVRDSAESVL…
>FGRAMPH1_01T28253	+
MAQDSACTVITLSPHNELPRSQHHQLLFSHVSPSDLQTSSPPPFVSRIFTMSHKTQEPVITKTSDLSLQDAKWITLKKIEYVDQVGKERTWEVATRKTRGKSGVDAVAMGNILLHPSKPASTLLVIQYRPPLDAYTIEWPAGLIDAEETAEEAAVREFKEETGYDCRVLSVSPAQAADPGMTNANMQLAMVEVQLSENEEEPEQRLDDGEHIQREIIPLAELYERLVEYSKRERTVVAAKLFHFAAGMHFAQTQKYY*
>FGRAMPH1_01T28255	+
MSQQTPNILTEPKRPPSSPVSAASRADSSASVLQSCQSVVDNALTALIAVPEEGDNSTRKLIQLGRQWCRDRLNTYPGEQSESATDCWIHTDKTSGPNGTGYIRDNIAYAWRRAWREDWRTVQHSSSCHRQYMPEAVSRALQKRKGPRGSVTIASEIGFHSHTFGMFYPGARPAKLPIKLAHYFAKSSRSPSPEPSWQALTDQTMDADKDSLQDCFSDDDLEDQLTDVPDQPSQLPRRAGLSQPSQLRPVPQTLPFLPLTEWDPDQRYDDQPPSYIHYALEWKMTLLSLLGDVSIVQDIALAPGDFWDHTLRPELERLVEKTRSNEPCKADATTITMSVTDRSERDITKRFDELMID*
>FGRAMPH1_01T28257	+
MQYCVWHGSKVRSETQKQQYQLARDLTLDKGLDLELLYSDQDAQFYIDHGIMEGVARRWVRDVKLFLDQYDEF*
>FGRAMPH1_01T28259	-
MAPNIAESQHLLIRDMILSKSQDGVSPKDDKIAATTGCSTRTVRTIRSNLRRFGTTRAPPNKTGRPKTITPNMFTALSDRLANRPWMRLTDMAAFLRKEFDVDVSRFSLSRALRSAEWRKKVTRNVEKERNADLREEHVYERSEYRSYQLVFIDESGCDRSIGTKHKGWAPRGVTPIQVKRFHRGRRFQILPAYSQDGVIHFRVFEGSTDSEIFENFVEELLPYCGRWPEPRSVLIMDNATFHHSEKIQRLCDEAGVVLKFLPPYSPDLNPIEEYFGELKTYIKQVWDEYEDVIRHNFGLFLEECVRTVGERQMSARGHFRRAGISIEEQPS*
>FGRAMPH1_01T28261	-
MDPLSITASVVGVAVPALQCAQQLRKTIQAILDAPSEIASLGEELLTIEQAITSIQEVSDQQWQSLGESVVSQSKTGMNLCRKSCSKFQAGIKHRTRHGEDGKLSWRDRTAIGLFGQDQIKSTSSQLQNCKGTLTSVVSIANLHSSLQQTSAIEEMMRMVSIKGTEIAKAVSTTERQLDEVSARLEKLQLALLQEVKEDPEERSAKDQVETEKFALQQSLKLLRALNENVQSAAKDMRKGQGQVVNTMSFGNHNEGVQAGISNAPITYSRGKNRDD*
>FGRAMPH1_01T28263	+
MAECVSSMTFGDGNRGVQVGHSNAPIQATFNLPPEPLESTPPPFPSIPYLHDPTFVDRGDILDQIGRQCSEPASRVAIVGLGGVGKSQLAIEFAHRFAATPAEAWVFWVHGSTQARIIEGFKSIADKVKLMGRNRPDADVLQLVFDWLSNERNGKWLLVLDSADDSDVLHSTSGGNDNGPKLMEYLPQSPNGSILITTRNRDLAFRLTGAYEAIHEIGPMTQEEALVLLENRLGTLSDANAAADLVRSLEFVPLAISQAAAYIQMRAPRTSLVQYLTEFRQSESKRAKLLSHDAGDLRRDLRQDGGASNAILTTWQVSFDHVRSRRPSAADLLSLMSFFNRQGIPESLLRPPKDSHNAAQSINPEDITDSESQGSDDEVEHEFDDDIQILRDYYLIVLS…
>FGRAMPH1_01T28265	-
MVAEFGGHDKDATRTGPTLTIESYLEIQAYGTRNKTSKRLIFPRDAFNVSYPKVLQYSQNAHFENHKQSI*
>FGRAMPH1_01T28267	-
MALVGLGRVGKTQIALRFAYRIKEKRPEYSIFWVPVLSAETAERAYGDMAKKLGLQKSSEDEDVKDLVCQHLSSNKAGKWLLIIDNADEEELIFGSAEKPGLEEYLPQNENGIILLTTRSGQVANDFAQADVIYIEQMDQEEAKNLFEKSLVQKHLLRDKVATGELLAYLTFLPLAITQAAAYLNQNRAPIQTYLAPLRNAEKEDMRILETEFRDNTRYKNSQNAVGTTWIVSFHQMQKSNHIAVYILSFISCIEPKAIPQSILPDMKPFELEGAVGALCSYSFLSRREGGDMLDMHSLVHTATQAWLEKLGREKQVLKDAVCHVAARFPTKNDAHYGLRREYLPHAMRLLNRNHGDEAVEVYQLFEKVGDSFDADRRFKEAIRCFEEVCRWKQGCHPK…
>FGRAMPH1_01T28269	-
MASKGPPIDRRSFRVAIICALPLEADAVSLLFDHFWDRERGPYGRAYGDMNHYITGRIGRHDVVMVVLPNMGTNSAAAATASLRSSYTGLNLALLVGICAGVPRIANFDICLGDVVVSKTIIQYDYGRRYSGHFDVKCTVEDSLGRANKDIRSLLAGFETEFIRKWLKDDASKYLKDLQETAKKEQRQANYQYPGTDEDKLYPPTYAHRHRKWCSVCASDPDAFCELASKASCAETGCDSAHLTVRERLEGIISGGDFRPGVFIGRIGSGNTVIKSGEDRDQIAAQHNLIAFEMEGAGAWDEVPCIVVKGIYNYADSHKNKAWQDFAAATAAAVAKAILGQYAAHDGH*
>FGRAMPH1_01T28271	+
MTVSQRNQAQNLPYAKQAQKQPPFHQLLLEKSILPGTTDVSKMSKDDLYSLFPASRRTKEDDLVAPEIFHSFSLANVENDRTLLTTILDWVDKEIDLCRLANIHNFLWIAGRPMPPRPIHQQRLLNREIFITERLDLHLVWTTDRIFLKPLPRFLLDPRFWERFLYCHTVPVLNGEQCSCRGRRERALGFLFSYAALMAHESDFYIAKEAHLIPEEVQWSAWRKAVREILGTSPIYPAIDPRFHYGELRLSRLNKIYFYWKTPLSGYASRWNQYGSFFHDNFALLASSTVYIAVVLTAMQVGLATEALQNNTAFQSASYGFTIFSIVGPLAATGLVMITFCYLFIGNWIATQRYRERRLKWIKNDR*
>FGRAMPH1_01T28273	+
MSTINGSPSVTRGAFFAAGVVAVFVTVYPLAAKVQRRNETSRPDGITIVHDPPSPKFEIVAVHGLGAHPVHTWEGKPSTGSLSKLHLLRDLLREDFPTARISSFAYNSDWLVDAPEKTAQQIGRRLLEKLSQHRGDSQRLPIIFIGHSFGGIVIKEALCAADTSSNILEDTCGIIFLGTPHQGSSLSTPAALLSQLTGFLGSNKTLLLNLRRNHSQLSDLEDRFRPLVQFKPVISFYETKPAYLLGLSIGCIVDRESARGSSIEPVGIDTDHAGLNKFDSPKHPGYRALKDAVKKLRVKSLLEQADDHIREKHYTSERLKIERLSGDPLLMDQCYINLSIVDHIKTNAKARNQSEDSNSTSQLSPFSLFARQKVEMPIAEIQVRLADVFNERKEPDGNI…
>FGRAMPH1_01T28275	+
MAQAGLHVIYDSASSDPPCEAELDIVAVHGLNFKNSNNHARKTWTMNDKLWLKDFLPVALLPKHARVMLFEYNSSPAIGATAIKLSGHANNLLQWLKLKRKTLVAATLDVTYKSMVEAACLLVFFATPHQGGNYANLGNIVAKIVRTGMSKPKNDLLEALKANSDQAMQRFEQARHLPERCLVVNFYEGDPYGKIGLIVDKKSATLNLPGTREKQIAIHADHSTICKFDSPDSLACELVLGTIADEVERALAMSRSATPLVPSYPLSSMTPVKTFVQRPLLRDSIRNQFTKPLEADKQGEVRTVGVWGMGGAGKSQIALSYVQRYRTEYNATFWIQADHTASVDRDFLAIYRLLVDTTQPLSDPKPEDVKREVLGWFARASEKYLVIFDGADSLHQTDE…
>FGRAMPH1_01T28277	+
MSTKSSIVQVFLSKKHFKLDSSLLNKLVDYAEEGRLMRNHDHVPETIRERIFRQDQENLERKQLKRKRGDSLPPINISVSCLGSHGEAQQDPPTGTHVTAAGSRVGFSRRAVDIVIPLPIDRAGIAYCEWLCGRVESDYWEAGFRQAHRITMEACFDLKRMLNRQASVPEVSFRTILSPTSSDTGLDVRAKVSADFIKQLLRHCNRWPEPESVLVMDNATIHCSKEIEEMCERAGVKQVFTAPYTPITNPIEEHFAELKAYAKVRWDEHIDLIHKGLGVSRAPIDTRQLDASLCIRRQDLIPLLPLERSCLPRSDAFWGPSLAS*
>FGRAMPH1_01T28279	-
MSPQRLAEGFARLRDRLSTRDRSRQKRNLAEQPTSSERSDSQVQQQPQSQQVSSASIHSTATTATASQNVPIQTEAIEEDSQPGEKPSSKSDLWDKALTHLSKSEYDRDIVAIVKTFTGNPIGDNATADGRPSSTKDLAKDISERMAQAIQDGQHSREQREWKVTVGHKEYSARGMVDKTVDILNKFVAVGDVAVSFDPVHAALPWAAVRFVLVTLAAGSELRSQIIFGLAKVTSLILQCDTYRRIYLTLDPTLRPAADILDLLETSIVHSYVNSLLFLGFAIHRQGSRSRMVSAPFKLNEVESYIESLQESGDQLSRAADDCEKQCNLQNRTGVKELLRYAKESHQSMQTHSVLLMDIHQKMVFDKLRTAEGAAYDSHANEHEARCHPQTRVDLLAQI…
>FGRAMPH1_01T28281	+
MAPRLSDADHEMMKAMIQNGEPTKQIAQSIPCDPRTVRKAKARYRLFESTKAPPNRVGRYKKVTPYKQDVLLENLAQYLTTDRTQMVTFLHDEFEDDVSLSTISRSLKDARWTRKNCHPVAQQRNPELRDLYLYKLSKYKLYQMIFIDESGADRRVGYRKKGWAPSGVTPIQVGRFNREQRYQILAAYTQDGIELARVYPGSTDATLFKGTLSSSCYMAADDGRSRKPMCAGAGVELLYLPPYSPDFNPIEEYFAELKNFIKKPGPELSELFKKDFQAFLQACVDAVGKRKASAKGHFRHAGLAIDEYMEQVP*
>FGRAMPH1_01T28283	-
MIYEKDRLDGERRAKRKAASLESDRPIKIVDVLPTPPSSNFGTASPSVVDLTYLVIPKPIDRAVDDYTEWLCDQVEDENWKAGFRSAGSITRADCLDLRHVYQDRDIGYYVNQGVKAGIARSFVQDIKIWADSL*
>FGRAMPH1_01T28285	-
MGLRYSDRQNVLASCNQVSRNVFPCVVFVFSLFYPSRLHPPFKRPKVAAMEDDSQPFDPTQWDYDDLDFCTPQLRGTNTCGVSLADPSPSPSSHQRSRLPLLQLDDWDPDDTYDECPPTSVHYSIEWKLQLRKGRLSKLTNDTEQNLVLAPGALWETTLKDKVDRLLRQKTPRGKSYLPEETIVVVSVTDRSERDLTKRFDEFDIDWQMAAEQLCKWSPLFRAGKKLRIDISFICKEEP*
>FGRAMPH1_01T28287	+
MTEVLGVASSVIAVVDLSAKVINWCVQYAKDVSHAKEDKKRLVEELTRLNLASVNACNLLNGPHGSRLKASHVLYLATVDSQSQLKRIEGQLAERGGQGKVSFEALKWPFKSKDVQSLIQDLDRCTKAIYSALEVDQTSILLDIDHKIALDTLPIAEGASFDSHAEEHNPTCLPNTREELLRDIGCWIDDDTSKTIFWLNGMAGTGKSTISRTVAQARSRRGNLGASFFFKRGEMDRGNLNKLMSTLAYQLSLSIPEAAFFVKKALDDNSAIMRKSVKEQFQKLIQEPLSEAAASAKVLSPVVIVIDALDECDQEDDIRLLINILSQAKTSLPHLRVFLTSRPELPIRLGFSQVQGSYQALVLHAIPAQIVEHDIVVFLDAEFEKIRHDFNTTVGDERK…
>FGRAMPH1_01T28289	+
MPSISKFISKIGLGEGRSRRSTQESPSTAPAPALDRHPQGLGVVSEGTNPVVDIVVIHGLDGHREKTWTAKNGVHWLRDLLRVDIPEARILAWGYDANTHAVSGTCCSFLYDHARTLVSDLNRRRKLTDSSERPIIFIAHSLGGIVVKSALIHSDAARQGALPEHRSIKLSTYGILFMGTPHQGGNGVQLGRILTNVASVFVPADDRLLKHLERDSEWLLQQLGQYGPISGEFVTKFAYENYKTPIALGKQIMVVPKASAVVPGQADVEPIAIYANHKNMVKFPSKQDVGYNTILENLQIMVKEAEAVIRARWEAERRAENARGNEMQFSLGFSLSEVNEVNHFVARQEQLVQLQGILTASRDRRIVVIHGLGGMGKTQLAIAFTKQNHESFSAVFWMN…
>FGRAMPH1_01T28291	-
MSSNNVNNAPASPYTGPPPSNAEMMAELQMLRNTVRTLQARVNEPPAAAPPAPSVDNQRDLGEVIKPTTPEPFKGKAAEDQETQNIFADWLNFEALLKDNFGVINEERQAAAEILALKQHGSCTAHSAKFRQLAAKTEWDDEALMEIYYRSMKEEVKDELYKADRPGNLTEKGSNYNPYFPNQHRNNNRGNNRNSQPRQRNYGNNTSYGTQPGPMDLGAAQTPGQQRDLSKCKCYNCNQMGHMARQCPQPKKRGTHDFVIWVVCRTVYTVYIENKLRELAK*
>FGRAMPH1_01T28293	+
MDVWHSYGTLCHNCLIFWSIGKVQHATCTLTLDRGVSPSVQR*

## Sheet: Table S7
Table S7 Annotation of genes specific to the F. graminearum type strain PH-1
# emapper version: emapper-1.0.3-35-g63c274b emapper DB: 2.0
# command: ./emapper.py --cpu 6 -i /data/shared/emapper_jobs/user_data/MM_7faas5qd/query_seqs.fa --output query_seqs.fa --output_dir /data/shared/emapper_jobs/user_data/MM_7faas5qd -m diamond -d none --tax_scope auto --go_evidence non-electronic --target_orthologs all --seed_ortholog_evalue 0.001 --seed_ortholog_score 60 --query-cover 20 --subject-cover 0 --override --temp_dir /data/shared/emappe…
# time: Mon Dec 28 11:07:28 2020
#query_name seed_eggNOG_ortholog seed_ortholog_evalue seed_ortholog_score best_tax_level Preferred_name GOs EC KEGG_ko KEGG_Pathway KEGG_Module KEGG_Reaction KEGG_rclass BRITE KEGG_TC CAZy BiGG_Reaction
Query	Seed ortholog	e-value	score	best tax lvl	Preferred_name	GO terms	EC number	KEGG KO	KEGG pathway	KEGG module	KEGG reaction	KEGG rclass	BRITE	KEGG TC	CAZy	BiGG reaction	annot lvl	matching OGs	Best OG	COG cat	description
FGRAMPH1_01T28129	5518.FGSG_09011P0	1.9e-261	907.9	Nectriaceae	taf6	GO:0000123,GO:0000124,GO:0000228,GO:0000428,GO:0000785,GO:0000790,GO:0001085,GO:0001102,GO:0003674,GO:0003682,GO:0005198,GO:0005488,GO:0005515,GO:0005575,GO:0005622,GO:0005623,GO:0005634,GO:0005654,GO:0005667,GO:0005669,GO:0005694,GO:0005737,GO:0005829,GO:0006139,GO:0006325,GO:0006338,GO:0006351,GO:0006352,GO:0006366,GO:0006367,GO:0006464,GO:0006473,GO:0006475,GO:0006725,GO:0006807,GO:0006996,GO:…		ko:K03131	ko03022,ko05168,map03022,map05168				ko00000,ko00001,ko03021,ko03036				Fungi	1FR0Y@110618,217EJ@147550,38DST@33154,3NV9P@4751,3QQHV@4890,3TFHZ@5125,COG5095@1,KOG2549@2759	NA|NA|NA	K	to transcription initiation factor TFIID complex 60 kDa subunit
FGRAMPH1_01T28131	101028.EKJ72690	5.1e-215	753.8	Hypocreales													Fungi	211CZ@147550,3AG1G@33154,3PANI@4751,3QTNY@4890,3TD84@5125,COG0443@1,KOG0101@2759	NA|NA|NA	O	Belongs to the heat shock protein 70 family
FGRAMPH1_01T28133	101028.EKJ72691	7.4e-136	490.0	Nectriaceae				ko:K17437					br01610,ko00000,ko03011				Fungi	1FTMQ@110618,219G7@147550,29ZRP@1,2RXWY@2759,3A336@33154,3P1ZT@4751,3QUIV@4890,3TG8A@5125	NA|NA|NA	S	to RNase III domain protein
FGRAMPH1_01T28135	5518.FGSG_09008P0	6.7e-198	696.4	Nectriaceae													Fungi	1FRBF@110618,2167G@147550,2CVJX@1,2RS6C@2759,3AFGQ@33154,3PBKZ@4751,3QRWR@4890,3TEE2@5125	NA|NA|NA
FGRAMPH1_01T28139	101028.EKJ72693	0.0	2026.5	Nectriaceae			1.6.1.2	ko:K00323	ko00760,ko01100,map00760,map01100		R00112	RC00001	ko00000,ko00001,ko01000				Fungi	1FN2W@110618,21582@147550,2QQ0A@2759,38CB0@33154,3NYXQ@4751,3QKYV@4890,3TDAT@5125,COG1282@1	NA|NA|NA	C	NAD(P) transhydrogenase, mitochondrial precursor
FGRAMPH1_01T28141	5518.FGSG_09005P0	1.2e-75	288.9	Nectriaceae		GO:0005575,GO:0005622,GO:0005623,GO:0005737,GO:0005739,GO:0005740,GO:0005743,GO:0005746,GO:0005747,GO:0006950,GO:0006979,GO:0008150,GO:0016020,GO:0019866,GO:0030964,GO:0031090,GO:0031966,GO:0031967,GO:0031975,GO:0032991,GO:0043226,GO:0043227,GO:0043229,GO:0043231,GO:0044422,GO:0044424,GO:0044425,GO:0044429,GO:0044444,GO:0044446,GO:0044455,GO:0044464,GO:0045271,GO:0050896,GO:0070469,GO:0098796,GO:…		ko:K11352,ko:K18160	ko00190,ko01100,ko04714,ko04723,ko04932,ko05010,ko05012,ko05016,map00190,map01100,map04714,map04723,map04932,map05010,map05012,map05016	M00146			ko00000,ko00001,ko00002,ko03029	3.D.1.6			Fungi	1FUWW@110618,21A2G@147550,3A5JT@33154,3P3TS@4751,3QVXZ@4890,3TIEA@5125,KOG3382@1,KOG3382@2759	NA|NA|NA	C	Accessory subunit of the mitochondrial membrane respiratory chain NADH dehydrogenase (Complex I), that is believed not to be involved in catalysis. Complex I functions in the transfer of electrons from NADH to the respiratory chain. The immediate electron acceptor for the enzyme is believed to be ubiquinone
FGRAMPH1_01T28143	5518.FGSG_09004P0	2.2e-282	977.6	Nectriaceae	PGS1	GO:0003674,GO:0003824,GO:0005575,GO:0005622,GO:0005623,GO:0005737,GO:0005739,GO:0005740,GO:0006139,GO:0006220,GO:0006221,GO:0006629,GO:0006644,GO:0006650,GO:0006655,GO:0006725,GO:0006753,GO:0006793,GO:0006796,GO:0006807,GO:0006996,GO:0007005,GO:0007006,GO:0008150,GO:0008152,GO:0008444,GO:0008610,GO:0008654,GO:0009058,GO:0009117,GO:0009165,GO:0009987,GO:0016020,GO:0016024,GO:0016043,GO:0016740,GO:…	2.7.8.5	ko:K00995	ko00564,ko01100,map00564,map01100		R01801	RC00002,RC00017,RC02795	ko00000,ko00001,ko01000			iMM904.YCL004W,iND750.YCL004W	Fungi	1FN7Y@110618,213C6@147550,38DGE@33154,3NTXX@4751,3QJYG@4890,3TDMB@5125,COG1502@1,KOG3964@2759	NA|NA|NA	I	to CDP-diacylglycerol-glycerol-3-phosphate 3-phosphatidyltransferase
FGRAMPH1_01T28145	5518.FGSG_09003P0	3.4e-180	637.5	Nectriaceae	yml6	GO:0000313,GO:0000315,GO:0003674,GO:0003676,GO:0003723,GO:0003735,GO:0005198,GO:0005488,GO:0005575,GO:0005622,GO:0005623,GO:0005737,GO:0005739,GO:0005759,GO:0005761,GO:0005762,GO:0005829,GO:0005840,GO:0006412,GO:0006518,GO:0006807,GO:0008150,GO:0008152,GO:0009058,GO:0009059,GO:0009987,GO:0010467,GO:0015934,GO:0019538,GO:0022626,GO:0031974,GO:0032543,GO:0032991,GO:0034641,GO:0034645,GO:0043043,GO:…		ko:K02926	ko03010,map03010	M00178			br01610,ko00000,ko00001,ko00002,ko03011				Fungi	1FU84@110618,216Q8@147550,38BG5@33154,3NXR2@4751,3QRD0@4890,3TFT7@5125,COG0088@1,KOG1624@2759	NA|NA|NA	J	Ribosomal protein L4/L1 family
FGRAMPH1_01T28147	5518.FGSG_09002P0	2.2e-251	874.4	Nectriaceae	MRPL35	GO:0000313,GO:0000315,GO:0003674,GO:0003735,GO:0005198,GO:0005575,GO:0005622,GO:0005623,GO:0005737,GO:0005739,GO:0005759,GO:0005761,GO:0005762,GO:0005840,GO:0006412,GO:0006518,GO:0006807,GO:0008150,GO:0008152,GO:0009058,GO:0009059,GO:0009987,GO:0010467,GO:0015934,GO:0019538,GO:0031974,GO:0032543,GO:0032991,GO:0034641,GO:0034645,GO:0043043,GO:0043170,GO:0043226,GO:0043227,GO:0043228,GO:0043229,GO:…		ko:K17439					br01610,ko00000,ko03011				Fungi	1FQ5B@110618,21541@147550,39SR7@33154,3NXRG@4751,3QJFS@4890,3TEZJ@5125,COG1881@1,KOG3346@2759	NA|NA|NA	S	Phosphatidylethanolamine-binding protein
FGRAMPH1_01T28149	5518.FGSG_09001P0	4.7e-158	563.9	Nectriaceae		GO:0000003,GO:0000976,GO:0000977,GO:0000978,GO:0000981,GO:0000982,GO:0000987,GO:0001012,GO:0001067,GO:0003674,GO:0003676,GO:0003677,GO:0003690,GO:0003700,GO:0005488,GO:0006355,GO:0006357,GO:0007049,GO:0008150,GO:0009889,GO:0009987,GO:0010468,GO:0010556,GO:0010672,GO:0019219,GO:0019222,GO:0022414,GO:0031323,GO:0031326,GO:0043565,GO:0044212,GO:0050789,GO:0050794,GO:0051037,GO:0051171,GO:0051252,GO:…		ko:K04450	ko04010,ko04013,ko04022,ko04151,ko04211,ko04261,ko04624,ko04668,ko04714,ko04728,ko04911,ko04915,ko04918,ko04922,ko04925,ko04926,ko04927,ko04934,ko05030,ko05031,ko05034,ko05161,ko05164,ko05166,ko05169,ko05203,map04010,map04013,map04022,map04151,map04211,map04261,map04624,map04668,map04714,map04728,map04911,map04915,map04918,map04922,map04925,map04926,map04927,map04934,map05030,map05031,map05034,ma…				ko00000,ko00001,ko03000				Fungi	1FZHU@110618,21C91@147550,3A9HT@33154,3P7HQ@4751,3QYS6@4890,3TJEE@5125,KOG1414@1,KOG1414@2759	NA|NA|NA	K	Basic region leucine zipper
FGRAMPH1_01T28151	140110.NechaP45969	1.2e-44	185.7	Nectriaceae		GO:0000228,GO:0000278,GO:0000723,GO:0000781,GO:0000784,GO:0005575,GO:0005622,GO:0005623,GO:0005634,GO:0005657,GO:0005662,GO:0005694,GO:0006139,GO:0006259,GO:0006260,GO:0006261,GO:0006269,GO:0006281,GO:0006310,GO:0006725,GO:0006807,GO:0006950,GO:0006974,GO:0006996,GO:0007049,GO:0008150,GO:0008152,GO:0009058,GO:0009059,GO:0009987,GO:0016043,GO:0016070,GO:0018130,GO:0019438,GO:0022402,GO:0030894,GO:…		ko:K10740	ko03030,ko03420,ko03430,ko03440,ko03460,map03030,map03420,map03430,map03440,map03460	M00288			ko00000,ko00001,ko00002,ko03032,ko03400				Fungi	1FQ81@110618,21BKP@147550,2CZSS@1,2SBIR@2759,3A7BU@33154,3P5DR@4751,3QXRY@4890,3TN2E@5125	NA|NA|NA	S	Replication factor A protein 3
FGRAMPH1_01T28153	5518.FGSG_08999P0	0.0	1483.0	Nectriaceae		GO:0003674,GO:0005096,GO:0005575,GO:0005622,GO:0005623,GO:0005737,GO:0008047,GO:0008150,GO:0030234,GO:0030695,GO:0043085,GO:0043087,GO:0043547,GO:0044093,GO:0044424,GO:0044464,GO:0050790,GO:0051336,GO:0051345,GO:0060589,GO:0065007,GO:0065009,GO:0098772											Fungi	1FSF3@110618,218AZ@147550,2E3ZK@1,2SAYM@2759,39Z8U@33154,3NZ46@4751,3QQG4@4890,3TH3Y@5125	NA|NA|NA	S	RhoGAP domain
FGRAMPH1_01T28155	101028.EKJ72701	1.3e-269	935.3	Nectriaceae	SNF4	GO:0000166,GO:0001302,GO:0001932,GO:0001934,GO:0003674,GO:0005488,GO:0005524,GO:0005575,GO:0005622,GO:0005623,GO:0005634,GO:0005635,GO:0005641,GO:0005737,GO:0005829,GO:0005886,GO:0006109,GO:0006111,GO:0006355,GO:0006357,GO:0006464,GO:0006468,GO:0006793,GO:0006796,GO:0006807,GO:0006996,GO:0007031,GO:0007154,GO:0007165,GO:0007568,GO:0007569,GO:0008047,GO:0008144,GO:0008150,GO:0008152,GO:0009889,GO:…		ko:K07200	ko04068,ko04152,ko04211,ko04213,ko04371,ko04530,ko04710,ko04714,ko04910,ko04920,ko04921,ko04922,ko04931,ko04932,ko05410,map04068,map04152,map04211,map04213,map04371,map04530,map04710,map04714,map04910,map04920,map04921,map04922,map04931,map04932,map05410				ko00000,ko00001				Fungi	1FPJ3@110618,211QA@147550,38BHA@33154,3NXN4@4751,3QPMJ@4890,3TCZX@5125,COG0517@1,KOG1764@2759	NA|NA|NA	C	nuclear protein SNF4
FGRAMPH1_01T28157	101028.EKJ72702	1e-152	547.0	Nectriaceae	VAC8	GO:0000011,GO:0000322,GO:0000323,GO:0000324,GO:0000329,GO:0003674,GO:0005488,GO:0005515,GO:0005575,GO:0005622,GO:0005623,GO:0005634,GO:0005737,GO:0005773,GO:0005774,GO:0005829,GO:0006914,GO:0006996,GO:0007033,GO:0008104,GO:0008150,GO:0008152,GO:0009056,GO:0009607,GO:0009987,GO:0016020,GO:0016043,GO:0016050,GO:0016236,GO:0016237,GO:0022406,GO:0022607,GO:0030447,GO:0030448,GO:0031090,GO:0032258,GO:…		ko:K08332					ko00000,ko03029,ko04131				Fungi	1FP4C@110618,212HQ@147550,3ATTB@33154,3NU9V@4751,3QKFU@4890,3THA4@5125,KOG4224@1,KOG4224@2759	NA|NA|NA	U	Vacuolar protein 8
FGRAMPH1_01T28159	5518.FGSG_13498P0	5.8e-99	366.7	Nectriaceae		GO:0003674,GO:0003824,GO:0004175,GO:0004222,GO:0005575,GO:0005622,GO:0005623,GO:0005737,GO:0005739,GO:0005740,GO:0005743,GO:0006465,GO:0006508,GO:0006518,GO:0006605,GO:0006626,GO:0006627,GO:0006807,GO:0006810,GO:0006839,GO:0006886,GO:0006996,GO:0007005,GO:0008104,GO:0008150,GO:0008152,GO:0008233,GO:0008236,GO:0008237,GO:0009987,GO:0010467,GO:0015031,GO:0015833,GO:0016020,GO:0016043,GO:0016485,GO:…		ko:K09647	ko03060,map03060				ko00000,ko00001,ko01000,ko01002,ko03029				Fungi	1FU0X@110618,21AVR@147550,395CK@33154,3P2HD@4751,3QXHS@4890,3TIDM@5125,COG0681@1,KOG0171@2759	NA|NA|NA	O	Peptidase S24-like
FGRAMPH1_01T28161	5518.FGSG_08995P0	5e-48	197.6	Nectriaceae													Fungi	1FUVD@110618,21BBZ@147550,2CZY4@1,2SC3P@2759,3A866@33154,3P74S@4751,3QX6Y@4890,3TJ6Q@5125	NA|NA|NA	S	Alb1
FGRAMPH1_01T28163	5518.FGSG_08996P0	7.7e-166	589.7	Nectriaceae				ko:K02520					ko00000,ko03012,ko03029				Fungi	1FR2C@110618,21BA0@147550,2QWD8@2759,3A9G3@33154,3P5DX@4751,3QXYV@4890,3TIBI@5125,COG0290@1	NA|NA|NA	J	translation initiation factor IF-3
FGRAMPH1_01T28165	5518.FGSG_08994P0	2.4e-304	1050.8	Nectriaceae													Fungi	1FZMK@110618,211WE@147550,3AER9@33154,3PC4A@4751,3QR82@4890,3TUGG@5125,COG0111@1,KOG0067@2759	NA|NA|NA	K	D-isomer specific 2-hydroxyacid dehydrogenase, NAD binding domain
FGRAMPH1_01T28167	5518.FGSG_08994P0	1.1e-222	778.9	Nectriaceae													Fungi	1FZMK@110618,211WE@147550,3AER9@33154,3PC4A@4751,3QR82@4890,3TUGG@5125,COG0111@1,KOG0067@2759	NA|NA|NA	K	D-isomer specific 2-hydroxyacid dehydrogenase, NAD binding domain
FGRAMPH1_01T28169	5518.FGSG_13497P0	3e-295	1020.4	Nectriaceae	RTT109	GO:0000724,GO:0000725,GO:0003674,GO:0003824,GO:0004402,GO:0005575,GO:0005622,GO:0005623,GO:0005634,GO:0006139,GO:0006259,GO:0006281,GO:0006282,GO:0006302,GO:0006310,GO:0006325,GO:0006342,GO:0006355,GO:0006357,GO:0006464,GO:0006473,GO:0006475,GO:0006725,GO:0006807,GO:0006950,GO:0006974,GO:0006996,GO:0008080,GO:0008150,GO:0008152,GO:0009405,GO:0009889,GO:0009890,GO:0009892,GO:0009987,GO:0010468,GO:…		ko:K11309					ko00000,ko03036				Fungi	1FTF7@110618,217GA@147550,39D19@33154,3NVSN@4751,3QJE6@4890,3TGB2@5125,COG5087@1,KOG4534@2759	NA|NA|NA	S	Histone acetylation protein
FGRAMPH1_01T28171	101028.EKJ72708	2.3e-187	661.4	Nectriaceae													Fungi	1FNWQ@110618,21ARC@147550,2EU3M@1,2SWBD@2759,3APAQ@33154,3PEP8@4751,3R0DS@4890,3TVJT@5125	NA|NA|NA
FGRAMPH1_01T28173	5518.FGSG_08992P0	5.6e-163	580.1	Nectriaceae													Fungi	1FZSB@110618,219NB@147550,3AKAT@33154,3PDN9@4751,3RNJP@4890,3TURN@5125,KOG1210@1,KOG1210@2759	NA|NA|NA	Q	Enoyl-(Acyl carrier protein) reductase
FGRAMPH1_01T28183	5518.FGSG_13493P0	0.0	2497.2	Nectriaceae													Fungi	1FM5Q@110618,21R9I@147550,39KDT@33154,3Q4SC@4751,3RN2D@4890,3TFB3@5125,KOG2029@1,KOG2029@2759	NA|NA|NA	S	Putative serine esterase (DUF676)
FGRAMPH1_01T28185	5518.FGSG_13492P0	0.0	1322.8	Nectriaceae													Fungi	1FW6J@110618,219QF@147550,2CZH9@1,2SACR@2759,3AJRR@33154,3PDBR@4751,3QUAN@4890,3TK4R@5125	NA|NA|NA	S	zinc finger
FGRAMPH1_01T28187	5518.FGSG_08988P0	3.2e-131	474.6	Nectriaceae													Fungi	1FPC0@110618,212HU@147550,3A2ZM@33154,3P3GA@4751,3RKD6@4890,3THC3@5125,COG0211@1,KOG4600@2759	NA|NA|NA	J	Ribosomal L27 protein
FGRAMPH1_01T28189	101028.EKJ72714	8.7e-65	252.7	Nectriaceae	LCL2	GO:0006508,GO:0006511,GO:0006807,GO:0006950,GO:0008150,GO:0008152,GO:0009056,GO:0009057,GO:0009987,GO:0010033,GO:0010243,GO:0010498,GO:0019538,GO:0019941,GO:0030163,GO:0030433,GO:0033554,GO:0034976,GO:0036503,GO:0042221,GO:0043161,GO:0043170,GO:0043632,GO:0044237,GO:0044238,GO:0044248,GO:0044257,GO:0044260,GO:0044265,GO:0044267,GO:0050896,GO:0051603,GO:0051716,GO:0071704,GO:1901564,GO:1901565,GO:…											Fungi	1FUSU@110618,21ASK@147550,2CYFG@1,2S416@2759,3A68K@33154,3P575@4751,3QW2J@4890,3TIVP@5125	NA|NA|NA	O	component of the endoplasmic reticulum- associated degradation (ERAD) pathway
FGRAMPH1_01T28191	5518.FGSG_08986P0	7.6e-135	486.5	Nectriaceae		GO:0000164,GO:0000271,GO:0003674,GO:0004857,GO:0004864,GO:0005575,GO:0005622,GO:0005623,GO:0005634,GO:0005737,GO:0005975,GO:0005976,GO:0005977,GO:0005978,GO:0006073,GO:0006091,GO:0006112,GO:0007059,GO:0008047,GO:0008150,GO:0008152,GO:0008287,GO:0009058,GO:0009059,GO:0009250,GO:0009892,GO:0009987,GO:0010563,GO:0010605,GO:0010921,GO:0010923,GO:0015980,GO:0016051,GO:0019208,GO:0019212,GO:0019220,GO:…		ko:K16833					ko00000,ko01009,ko03036				Fungi	1FPZK@110618,211G7@147550,2C4B9@1,2S2VH@2759,3A1DT@33154,3P2I5@4751,3QUHY@4890,3TV3R@5125	NA|NA|NA	S	Protein phosphatase inhibitor 2 (IPP-2)
FGRAMPH1_01T28193	5518.FGSG_08985P0	0.0	2083.9	Nectriaceae	ENA2	GO:0000322,GO:0000323,GO:0000324,GO:0003674,GO:0003824,GO:0005215,GO:0005388,GO:0005575,GO:0005622,GO:0005623,GO:0005737,GO:0005739,GO:0005773,GO:0005886,GO:0006810,GO:0006811,GO:0006812,GO:0006813,GO:0006814,GO:0006816,GO:0006873,GO:0006874,GO:0006875,GO:0006950,GO:0006970,GO:0006972,GO:0007154,GO:0008150,GO:0008324,GO:0008554,GO:0008556,GO:0009267,GO:0009268,GO:0009605,GO:0009628,GO:0009651,GO:…	3.6.3.7	ko:K01536					ko00000,ko01000				Fungi	1FKZQ@110618,2126B@147550,38FIJ@33154,3NU1M@4751,3QMM2@4890,3TDI5@5125,COG0474@1,KOG0202@2759	NA|NA|NA	P	Belongs to the cation transport ATPase (P-type) (TC 3.A.3) family
FGRAMPH1_01T28195	5518.FGSG_13490P0	0.0	1231.1	Nectriaceae		GO:0000002,GO:0000217,GO:0000404,GO:0003674,GO:0003676,GO:0003677,GO:0003690,GO:0003824,GO:0004518,GO:0004519,GO:0004520,GO:0004536,GO:0005488,GO:0005575,GO:0005622,GO:0005623,GO:0005634,GO:0005737,GO:0005739,GO:0006139,GO:0006259,GO:0006281,GO:0006290,GO:0006298,GO:0006725,GO:0006807,GO:0006950,GO:0006974,GO:0006996,GO:0007005,GO:0008150,GO:0008152,GO:0009314,GO:0009411,GO:0009416,GO:0009628,GO:…		ko:K13281					ko00000,ko01000				Fungi	1FMNA@110618,21R9H@147550,2QTMI@2759,38EU1@33154,3NXY6@4751,3QRQ1@4890,3THIN@5125,COG4294@1	NA|NA|NA	L	UV-endonuclease UvdE
FGRAMPH1_01T28197	5518.FGSG_13491P0	2.3e-104	384.8	Nectriaceae													Fungi	1FUKS@110618,21CK6@147550,2E70B@1,2SDNG@2759,3ACZD@33154,3P8VI@4751,3R0MK@4890,3TS01@5125	NA|NA|NA	O	RING-H2 zinc finger domain
FGRAMPH1_01T28199	5518.FGSG_13489P0	4.9e-257	893.3	Nectriaceae	RMS1	GO:0003674,GO:0003824,GO:0005575,GO:0005622,GO:0005623,GO:0005634,GO:0006417,GO:0006464,GO:0006479,GO:0006807,GO:0006950,GO:0008150,GO:0008152,GO:0008168,GO:0008170,GO:0008213,GO:0008276,GO:0008757,GO:0009889,GO:0009987,GO:0010468,GO:0010556,GO:0010608,GO:0016278,GO:0016279,GO:0016740,GO:0016741,GO:0018022,GO:0018026,GO:0018193,GO:0018205,GO:0019222,GO:0019538,GO:0031323,GO:0031326,GO:0032259,GO:…		ko:K05302					ko00000,ko01000,ko03036				Fungi	1FUBC@110618,212RI@147550,38CA9@33154,3NWQB@4751,3QKJ8@4890,3TH5S@5125,KOG1338@1,KOG1338@2759	NA|NA|NA	S	Rubisco LSMT substrate-binding
FGRAMPH1_01T28201	101028.EKJ72721	1.8e-248	864.8	Nectriaceae	apm1	GO:0003674,GO:0005488,GO:0005515,GO:0005575,GO:0005622,GO:0005623,GO:0005737,GO:0005768,GO:0005794,GO:0005798,GO:0006810,GO:0006886,GO:0006892,GO:0006896,GO:0006996,GO:0007033,GO:0007034,GO:0008104,GO:0008150,GO:0009987,GO:0012505,GO:0012506,GO:0012510,GO:0015031,GO:0015833,GO:0016020,GO:0016043,GO:0016192,GO:0016197,GO:0030117,GO:0030118,GO:0030119,GO:0030120,GO:0030121,GO:0030125,GO:0030130,GO:…		ko:K12393	ko04142,map04142				ko00000,ko00001,ko04131				Fungi	1FTAN@110618,213WE@147550,38BMR@33154,3NVTZ@4751,3QKDS@4890,3TF6X@5125,KOG0937@1,KOG0937@2759	NA|NA|NA	U	Belongs to the adaptor complexes medium subunit family
FGRAMPH1_01T28203	5518.FGSG_08983P0	1.5e-117	428.7	Nectriaceae													Fungi	1FQFS@110618,21C04@147550,2C05B@1,2T6F8@2759,3ADDD@33154,3P8FS@4751,3R0BP@4890,3TMXD@5125	NA|NA|NA
FGRAMPH1_01T28207	101028.EKJ72722	0.0	1087.8	Nectriaceae	OPI1	GO:0000122,GO:0003674,GO:0003712,GO:0003714,GO:0005488,GO:0005543,GO:0005575,GO:0005622,GO:0005623,GO:0005634,GO:0005635,GO:0005654,GO:0005737,GO:0005783,GO:0006355,GO:0006357,GO:0006629,GO:0006644,GO:0006793,GO:0006796,GO:0006950,GO:0006986,GO:0007154,GO:0007165,GO:0008150,GO:0008152,GO:0008289,GO:0008610,GO:0008654,GO:0009058,GO:0009889,GO:0009890,GO:0009891,GO:0009892,GO:0009893,GO:0009987,GO:…		ko:K21642					ko00000,ko03000				Fungi	1FU29@110618,213T4@147550,298ZU@1,2RG16@2759,39T1A@33154,3NYZC@4751,3QQMD@4890,3TEVU@5125	NA|NA|NA	S	Transcription factor Opi1
FGRAMPH1_01T28209	5518.FGSG_08980P0	2.1e-215	754.6	Nectriaceae			1.1.1.2	ko:K00002	ko00010,ko00040,ko00561,ko00930,ko01100,ko01110,ko01120,ko01130,ko01220,map00010,map00040,map00561,map00930,map01100,map01110,map01120,map01130,map01220	M00014	R00746,R01041,R01481,R05231	RC00087,RC00088,RC00099,RC00108	ko00000,ko00001,ko00002,ko01000,ko04147				Fungi	1FWN3@110618,211A9@147550,38EJ7@33154,3NVVI@4751,3QKI8@4890,3THK3@5125,COG1064@1,KOG0023@2759	NA|NA|NA	Q	Alcohol dehydrogenase GroES-like domain
FGRAMPH1_01T28211	5518.FGSG_08979P0	1.5e-126	458.8	Nectriaceae													Fungi	1FYZ0@110618,2165F@147550,2RZ3Y@2759,39ZF9@33154,3P1HD@4751,3QTFH@4890,3TFFH@5125,COG0693@1	NA|NA|NA	S	DJ-1/PfpI family
FGRAMPH1_01T28213	5518.FGSG_08978P0	4.5e-72	277.7	Nectriaceae													Fungi	1FUZC@110618,21ASF@147550,28MJ0@1,2QU2K@2759,38V44@33154,3PWRT@4751,3R0ET@4890,3TIQ6@5125	NA|NA|NA	S	Glioma tumor suppressor candidate region gene 1
FGRAMPH1_01T28215	5518.FGSG_08976P0	9.8e-87	326.2	Nectriaceae	GCV3	GO:0001505,GO:0005575,GO:0005622,GO:0005623,GO:0005737,GO:0005739,GO:0005960,GO:0006082,GO:0006464,GO:0006520,GO:0006544,GO:0006546,GO:0006730,GO:0006807,GO:0008150,GO:0008152,GO:0009056,GO:0009063,GO:0009069,GO:0009071,GO:0009249,GO:0009987,GO:0010467,GO:0016054,GO:0017144,GO:0018065,GO:0018193,GO:0018205,GO:0019464,GO:0019538,GO:0019752,GO:0032991,GO:0036211,GO:0042133,GO:0042135,GO:0042737,GO:…		ko:K02437	ko00260,ko00630,ko01100,ko01110,ko01130,ko01200,map00260,map00630,map01100,map01110,map01130,map01200	M00532	R01221	RC00022,RC02834	ko00000,ko00001,ko00002				Fungi	1FMFY@110618,219UZ@147550,3A5U5@33154,3P4M7@4751,3QWK6@4890,3TIDP@5125,COG0509@1,KOG3373@2759	NA|NA|NA	E	The H protein shuttles the methylamine group of glycine from the P protein to the T protein
FGRAMPH1_01T28217	5518.FGSG_08977P0	3.4e-191	674.1	Nectriaceae	HEM3	GO:0003674,GO:0003824,GO:0004418,GO:0005575,GO:0005622,GO:0005623,GO:0005634,GO:0005737,GO:0006725,GO:0006778,GO:0006779,GO:0006783,GO:0006807,GO:0008150,GO:0008152,GO:0009058,GO:0009405,GO:0009987,GO:0016740,GO:0016765,GO:0018130,GO:0019438,GO:0033013,GO:0033014,GO:0034641,GO:0042168,GO:0042440,GO:0043226,GO:0043227,GO:0043229,GO:0043231,GO:0044237,GO:0044249,GO:0044271,GO:0044419,GO:0044424,GO:…	2.5.1.61	ko:K01749	ko00860,ko01100,ko01110,ko01120,map00860,map01100,map01110,map01120	M00121	R00084	RC02317	ko00000,ko00001,ko00002,ko01000				Fungi	1FSXE@110618,217JP@147550,38D6W@33154,3NU7D@4751,3QR3W@4890,3TH4J@5125,COG0181@1,KOG2892@2759	NA|NA|NA	H	Porphobilinogen deaminase, dipyromethane cofactor binding domain
FGRAMPH1_01T28219	5518.FGSG_08975P0	1.8e-142	511.9	Nectriaceae	TEM1	GO:0000075,GO:0000166,GO:0000226,GO:0000278,GO:0000280,GO:0000910,GO:0001100,GO:0001882,GO:0001883,GO:0003674,GO:0003824,GO:0003924,GO:0005488,GO:0005515,GO:0005525,GO:0005575,GO:0005622,GO:0005623,GO:0005815,GO:0005816,GO:0005856,GO:0006996,GO:0007010,GO:0007017,GO:0007049,GO:0007088,GO:0007093,GO:0007096,GO:0007154,GO:0007165,GO:0007264,GO:0007265,GO:0007346,GO:0008104,GO:0008150,GO:0009987,GO:…		ko:K06682	ko04111,map04111				ko00000,ko00001				Fungi	1FKG3@110618,212YQ@147550,38E17@33154,3NYD0@4751,3QK2D@4890,3TH1P@5125,COG1100@1,KOG1673@2759	NA|NA|NA	U	Ras of Complex, Roc, domain of DAPkinase
FGRAMPH1_01T28221	101028.EKJ72730	6.3e-40	169.9	Nectriaceae													Fungi	1FVSV@110618,21GZ6@147550,29C7A@1,2RJAY@2759,38P0E@33154,3PQVW@4751,3RACQ@4890,3TP9X@5125	NA|NA|NA
FGRAMPH1_01T28225	5518.FGSG_08973P0	1e-70	272.7	Nectriaceae													Fungi	1FV2J@110618,21B9G@147550,2E9VW@1,2SG6B@2759,3A6IP@33154,3P6EW@4751,3QXYH@4890,3TJ32@5125	NA|NA|NA
FGRAMPH1_01T28227	5518.FGSG_08972P0	7.8e-263	912.5	Nectriaceae													Fungi	1FTVQ@110618,21E28@147550,2DYGC@1,2S6US@2759,3A8B0@33154,3P2WT@4751,3QVFD@4890,3TWDE@5125	NA|NA|NA	S	Fungal specific transcription factor domain
FGRAMPH1_01T28231	5518.FGSG_08971P0	4e-161	573.9	Nectriaceae			3.5.1.10	ko:K01433	ko00630,ko00670,map00630,map00670		R00944	RC00026,RC00111	ko00000,ko00001,ko01000				Fungi	1FP3K@110618,212RJ@147550,38GB0@33154,3NZTK@4751,3QRTU@4890,3TE87@5125,COG0299@1,KOG3076@2759	NA|NA|NA	G	Formyltetrahydrofolate deformylase
FGRAMPH1_01T28233	101028.EKJ72735	1.8e-136	491.9	Nectriaceae	CDC8	GO:0003674,GO:0003824,GO:0004550,GO:0004798,GO:0005575,GO:0005622,GO:0005623,GO:0005634,GO:0005737,GO:0006139,GO:0006165,GO:0006220,GO:0006221,GO:0006227,GO:0006233,GO:0006235,GO:0006725,GO:0006753,GO:0006793,GO:0006796,GO:0006807,GO:0008150,GO:0008152,GO:0009041,GO:0009058,GO:0009117,GO:0009123,GO:0009132,GO:0009133,GO:0009138,GO:0009139,GO:0009141,GO:0009142,GO:0009147,GO:0009148,GO:0009165,GO:…	2.7.4.9	ko:K00943	ko00240,ko01100,map00240,map01100	M00053	R02094,R02098	RC00002	ko00000,ko00001,ko00002,ko01000				Fungi	1FKYM@110618,2143K@147550,39U2H@33154,3P2YY@4751,3QUEI@4890,3THKP@5125,COG0125@1,KOG3327@2759	NA|NA|NA	F	Thymidylate kinase
FGRAMPH1_01T28235	5518.FGSG_08969P0	1.9e-206	724.9	Nectriaceae													Fungi	1FSMV@110618,215WI@147550,2E56B@1,2SC0Q@2759,3A10B@33154,3NZNJ@4751,3QNR5@4890,3TI20@5125	NA|NA|NA
FGRAMPH1_01T28237	5518.FGSG_08968P0	2.1e-125	455.7	Nectriaceae													Fungi	1FVM7@110618,21GWQ@147550,2CU4J@1,2RJ80@2759,38NXH@33154,3PQSZ@4751,3RA9P@4890,3TP66@5125	NA|NA|NA
FGRAMPH1_01T28239	5518.FGSG_13487P0	7.5e-247	859.4	Nectriaceae													Fungi	1FTDP@110618,21AIS@147550,2EI7E@1,2SNPN@2759,3AJA0@33154,3PBM3@4751,3QVIX@4890,3TNVF@5125	NA|NA|NA	S	integral membrane protein
FGRAMPH1_01T28241	5518.FGSG_08967P0	1.5e-216	758.4	Nectriaceae													Fungi	1FSGN@110618,217JX@147550,2CZBG@1,2S9ID@2759,3A067@33154,3P2GQ@4751,3QUSZ@4890,3TIMG@5125	NA|NA|NA	S	Nucleotide-diphospho-sugar transferase
FGRAMPH1_01T28243	5518.FGSG_05809P0	2.5e-153	548.5	Nectriaceae													Fungi	1FU3V@110618,21PIS@147550,2CZBG@1,2S9ID@2759,39KEP@33154,3Q4T9@4751,3RN3F@4890,3TTG9@5125	NA|NA|NA	S	Nucleotide-diphospho-sugar transferase
FGRAMPH1_01T28245	5518.FGSG_13485P0	7e-144	517.7	Nectriaceae													Fungi	1FZPC@110618,217VX@147550,3AH1M@33154,3PC8V@4751,3QP9N@4890,3TH67@5125,COG1112@1,KOG1802@2759	NA|NA|NA	L	nuclear-transcribed mRNA catabolic process, nonsense-mediated decay
FGRAMPH1_01T28247	5518.FGSG_08965P0	5.7e-149	533.5	Nectriaceae				ko:K07005					ko00000				Fungi	1FNIH@110618,213EE@147550,2S42E@2759,39Y65@33154,3NX0D@4751,3QNT1@4890,3TCW9@5125,COG3467@1	NA|NA|NA	S	Pyridoxamine 5'-phosphate oxidase
FGRAMPH1_01T28249	5127.CCT70962	5.1e-250	870.2	Nectriaceae	SRP54	GO:0003674,GO:0003676,GO:0003723,GO:0003824,GO:0003924,GO:0005048,GO:0005488,GO:0005575,GO:0005622,GO:0005623,GO:0005737,GO:0005783,GO:0005786,GO:0006605,GO:0006612,GO:0006613,GO:0006614,GO:0006616,GO:0006810,GO:0006886,GO:0008104,GO:0008150,GO:0008312,GO:0012505,GO:0015031,GO:0015833,GO:0016462,GO:0016787,GO:0016817,GO:0016818,GO:0017111,GO:0030942,GO:0032991,GO:0033036,GO:0033218,GO:0033365,GO:…	3.6.5.4	ko:K03106	ko02024,ko03060,ko03070,map02024,map03060,map03070	M00335			ko00000,ko00001,ko00002,ko01000,ko02044	3.A.5.1,3.A.5.2,3.A.5.7,3.A.5.8,3.A.5.9			Fungi	1FQMP@110618,217PE@147550,38BX4@33154,3NU4T@4751,3QMSR@4890,3THKZ@5125,COG0541@1,KOG0780@2759	NA|NA|NA	U	Binds to the signal sequence of presecretory protein when they emerge from the ribosomes and transfers them to TRAM (translocating chain-associating membrane protein)
FGRAMPH1_01T28251	5518.FGSG_13483P0	1.5e-274	951.4	Nectriaceae													Fungi	1FKKU@110618,212D8@147550,2QPR4@2759,38F26@33154,3NWKV@4751,3QJII@4890,3TCQA@5125,COG0624@1	NA|NA|NA	E	Peptidase family M20/M25/M40
FGRAMPH1_01T28253	5518.FGSG_13482P0	2.1e-140	505.0	Nectriaceae			3.6.1.13	ko:K01515	ko00230,map00230		R01054	RC00002	ko00000,ko00001,ko01000				Fungi	1FU50@110618,212IT@147550,39WPU@33154,3NZ8Q@4751,3QR7B@4890,3TSVU@5125,COG0494@1,KOG3041@2759	NA|NA|NA	L	NUDIX domain
FGRAMPH1_01T28255	474922.ELA24881	1.9e-19	103.6	Glomerellales													Fungi	1F476@1028384,21JQK@147550,2D1N8@1,2SIP1@2759,3AAN1@33154,3P7ZX@4751,3R3C2@4890	NA|NA|NA
FGRAMPH1_01T28257	474922.ELA37639	1.4e-20	105.1	Glomerellales													Fungi	1F2I7@1028384,21KQV@147550,29FYU@1,2RP4R@2759,38SUT@33154,3PUJ5@4751,3RDU8@4890	NA|NA|NA
FGRAMPH1_01T28259	5518.FGSG_08962P0	6.1e-193	679.9	Nectriaceae													Fungi	1FZDT@110618,21PIP@147550,2CZ2E@1,2S808@2759,39YK6@33154,3NZSR@4751,3QTM4@4890,3TTG7@5125	NA|NA|NA	S	DDE superfamily endonuclease
FGRAMPH1_01T28261	5518.FGSG_08961P0	9.1e-142	509.6	Sordariomycetes													Fungi	21B6G@147550,2EE10@1,2SJI2@2759,3A31P@33154,3P2VJ@4751,3QVQN@4890	NA|NA|NA	S	Fungal N-terminal domain of STAND proteins
FGRAMPH1_01T28263	5518.FGSG_08960P0	4.1e-305	1053.9	Hypocreales													Fungi	215K1@147550,38CFM@33154,3NYQ3@4751,3QJXH@4890,3TDS7@5125,COG0457@1,KOG1840@2759	NA|NA|NA	Z	Tetratricopeptide repeat
FGRAMPH1_01T28267	5518.FGSG_08959P0	2.5e-217	761.5	Nectriaceae													Fungi	1FZSA@110618,2182D@147550,39WDV@33154,3NZA9@4751,3QM9J@4890,3TURM@5125,COG0457@1,KOG1840@2759	NA|NA|NA	S	NB-ARC domain
FGRAMPH1_01T28269	5518.FGSG_08958P0	5.2e-203	713.4	Nectriaceae													Fungi	1FUET@110618,215BQ@147550,39V92@33154,3NX9U@4751,3QN5U@4890,3TG4G@5125,COG0457@1,KOG1840@2759	NA|NA|NA	S	Phosphorylase superfamily
FGRAMPH1_01T28271	5518.FGSG_13480P0	2e-213	748.0	Hypocreales													Fungi	211GQ@147550,2ECA5@1,2SI6N@2759,39YCM@33154,3P106@4751,3QR4N@4890,3TSZF@5125	NA|NA|NA
FGRAMPH1_01T28273	5518.FGSG_13479P0	1.1e-281	976.9	Eukaryota				ko:K03456,ko:K15424	ko03015,ko04071,ko04111,ko04113,ko04114,ko04151,ko04152,ko04261,ko04350,ko04390,ko04391,ko04530,ko04728,ko04730,ko05142,ko05160,ko05165,map03015,map04071,map04111,map04113,map04114,map04151,map04152,map04261,map04350,map04390,map04391,map04530,map04728,map04730,map05142,map05160,map05165				ko00000,ko00001,ko01009,ko03036,ko03400				Eukaryota	KOG0211@1,KOG0211@2759	NA|NA|NA	S	meiotic spindle elongation
FGRAMPH1_01T28275	5518.FGSG_08956P0	0.0	1375.1	Nectriaceae													Fungi	1FWDX@110618,21J4S@147550,38VDG@33154,3Q0G2@4751,3R7AV@4890,3TPJ4@5125,COG0457@1,KOG1840@2759	NA|NA|NA	Z	Tetratricopeptide repeat
FGRAMPH1_01T28277	5518.FGSG_13478P0	2.2e-187	661.4	Nectriaceae													Fungi	1FZEW@110618,21PTG@147550,2CUTP@1,2RP4Q@2759,38SUR@33154,3PUJ4@4751,3R1RT@4890,3TMY3@5125	NA|NA|NA
FGRAMPH1_01T28279	5518.FGSG_08955P0	0.0	1913.3	Nectriaceae													Fungi	1FZP6@110618,21RU4@147550,3AFR9@33154,3Q3UV@4751,3RKXV@4890,3TUM2@5125,KOG0265@1,KOG0265@2759,KOG0272@1,KOG0272@2759	NA|NA|NA	A	WD domain, G-beta repeat
FGRAMPH1_01T28281	5518.FGSG_08954P0	8.6e-181	639.4	Nectriaceae													Fungi	1FZDT@110618,21PIP@147550,2CZ2E@1,2S808@2759,39YK6@33154,3NZSR@4751,3QTM4@4890,3TTG7@5125	NA|NA|NA	S	DDE superfamily endonuclease
FGRAMPH1_01T28283	5518.FGSG_13477P0	3.7e-72	277.3	Nectriaceae													Fungi	1FYGR@110618,21HWS@147550,2CUTN@1,2RP4P@2759,38SUQ@33154,3PUJ3@4751,3RDU7@4890,3TQMW@5125	NA|NA|NA
FGRAMPH1_01T28285	5518.FGSG_13476P0	4.3e-140	503.8	Hypocreales													Fungi	21CCP@147550,2D1N8@1,2SIP1@2759,3AAN1@33154,3P7ZX@4751,3QUNW@4890,3TJEC@5125	NA|NA|NA
FGRAMPH1_01T28287	5518.FGSG_08952P0	0.0	1167.5	Hypocreales													Fungi	211RN@147550,38B6D@33154,3NZ4C@4751,3QPCR@4890,3TDS1@5125,KOG0266@1,KOG0266@2759	NA|NA|NA	D	Vegetative incompatibility protein het-e-1
FGRAMPH1_01T28289	5518.FGSG_13474P0	1.8e-301	1042.0	Hypocreales													Fungi	215G6@147550,38C2F@33154,3NYVZ@4751,3QJJI@4890,3TIBM@5125,COG0457@1,KOG1840@2759	NA|NA|NA	Z	Tetratricopeptide repeat
FGRAMPH1_01T28291	101028.EKJ72750	1.2e-101	376.3	Hypocreales													Fungi	21KCN@147550,2EXRQ@1,2SZCW@2759,3A5U1@33154,3P5F3@4751,3QXXQ@4890,3TJ4D@5125	NA|NA|NA	S	Retrotransposon gag protein
# 73 queries scanned
# Total time (seconds): 12.1121799946
# Rate: 6.03 q/s

## Sheet: Table S8
Table S8 Putative effectors encoded by the FG-12 genome
>FGMG_012395-RA | FPrate:0.091 | OMEGA:H-79
MKTTGLLTILFSSMATTAIASPNALPMGVEVVERDGKTIVREVPHALLSRGLEPRCRECVGQGGSCTIGD
GSCYAEDPHCTVHGAATSADLAVFARDRLASRRVFKT
>FGMG_012389-RA | FPrate:0.252 | OMEGA:V-157
MTIQDMSFFSTAYLVLGLATLATCTSSCTFQPSSNATLENSPRASPGSPYDPNILSQVPVASVCSCSNAT
EELACARRYIDIIDEQLAFLYARRLGYAAIAGFAKHSQGVELNDPTRNEAVAEGMAQRVLKYGGTKEAGR
VMGGEGCQIYVSLEYEVSQIQETCDPKFQADVKRDCN
>FGMG_012444-RA | FPrate:0.288 | OMEGA:S-208
MFASLPMYLVTLLAATSTVANAAAVSPVFTGLGTRYGDGCTEENCWQDGACSFVGYDLPPGIDGSTCVSD
EIWNKGANCGGCIQVTYKSKTIKVMVTNRTGGDKNHLDMTPATWNKLTNNMKGGGVDGIKWKWIECPLGS
APLQVHMHGGASKYWFAATIENMTHRVKAVQVSSDSGKTWKSCYLKDPNMWMLDGTLPSDSAWVRVTSVN
NKHVIVKNVALKSGVVTKATANF
>FGMG_012441-RA | FPrate:0.323 | OMEGA:T-247
MHAITILTVLAGVLNVEASPLQHAKRVLMGRLDDGAHEIEHKFQPLTDFDTDGCYYTSAIDKDGNTNRGL
SQKDVYFKGLAADCRDPNRLENNNVYSRRRCNNGWCAIMYEYYFEKDQIVWGTIGGGIGNGHTHDWENIV
VFVQGEDVKRVAPSCHGDYEHATNEPRLDGQRAKVVYHKDGGETHCWRMANEADDQVENYTGQWFIGNLV
GWDNWPVVNGRSLRDYLFDAWNGGVGPKFWDNDNKFTDNLRKAAGDGVPGFDPAVDE
>FGMG_012439-RA | FPrate:0.720 | OMEGA:D-298
MKTTSYVSALLGLASAVSAHYTFDKLTLSGQQEGTDNQYIRKHQNGYMPTKFKGIPDGSISPNDKDFTCN
KGSTASPDVFKVKAGDEIGLKQAFGGTGMQHPGPIQVYAAKVDDATKADPSNLDWYKIHQALVCKAGTPE
QLRGPSWCSWDEDSVHFKIPSTLPDGQYLVRGEHIALHGAHGGEAEFYYACAQLEISGNSASSIPGTSVK
IPGVYKQDDPAVNFSLWGSSTAYDVIPGPDVIPGGTIRGTADGASGDVEKVVEGGASSSTPAAESQDQGQ
SQNQNQNQNQQPAQSNNDSGCNSTPYVRRHARDVTARV
>FGMG_012381-RA | FPrate:0.741 | OMEGA:A-256
MKTSFMLTASMASAILAHPFDARSQQCNVAPSAATNAKIQPISQPSAATADACLKSCSSNASCKSFIFGL
PANAKAPTCKLYGVAAAQVPKQGSELYVFDKACSSKAVPNTKPTHDEPRGQVKGKLAARDEMCNTAPTGP
TNGNIQPFATPSVKTADKCQDACTAQNDCQSFVFGLPADASAPVCKLYKVAPANVPSGDDKLNVFAKSCP
AAKVPTTDPTHVEPRGEPLLSRSPTTTPRTAPVEQPPAEQKPNKKAADKPKAKTPTKPNKGNGKHN
>FGMG_012398-RA | FPrate:0.890 | OMEGA:P-221
MYIGFQTLAIALGASSLVAAAPAEASAVELMQNLNRQAINAIESTFAQSTERTAKKCTLANAAVRRDWRA
LSKKEKKAYIKAVLCLREKPSKADPAFAPGARTRYDDFVAVHINQTRSIHGTGNFLTWHRYFTWAYEKTL
QDECGYKGTQPYWNWFETRDFAVDPVFDGSDTSMGGDGEFFKHNGSSGGRGTILLPSGNGGGCIKSGPFA
GAVANLGPLPPAWTGWKQPRHLSSTTPLSPS
>FGMG_001749-RA | FPrate:0.011 | OMEGA:N-203
MKASLALSVLACAILTAATSIHHRRADNYLPAAGIPKAGYNAYGGNYDHPDTNKYQPVGQKQTSSSSGST
TSKNTDKKATTKAAKCISKGKLESIVNKYVSTFSGITDGGALAKAIFNDDVKFYSQSIWWTESSSKINKY
AKNDNYPPVYKNLKELIAGNIEKTNDPSAFIKGPVAYGCNTFTIYWKGDFEVPKEETMVAVYNWGAHITW
AKDDVCCDCPVVFDPQCKCTK
>FGMG_004707-RA | FPrate:0.012 | OMEGA:H-417
MHFKNVLVGLVALAVSVKAIPDVDTDFSLEARDDAAPIEARDESEFLAERNYYPPPSCKDNEYYNSKWKK
CVCKDGYEEKYGKCVKKTPTCKENQYYNWNWKKCVCKDGYEEKYGKCVKKTPTCKDNEVYNWHSKKCECK
DGYEAKYGKCVPKCKWGQYYDQHAGKCVCPKGTSEKYGKCVKNCPEGQYYNKHSDKCECPSGTSWKYGKC
IKNCPKGQTYNQWSHKCECNKGTEWKYGKCVPKCYNGQYYDNHAGKCVCPKGETFAYGKCIKTCPKGQTY
NQWSHKCECNKGTEWKYGKCVPKCEHPQFYDNHAGKCVCPKGTELKYGKCAPVCPEGKYFDKDSHKCVCN
KGTSEVYGKCVKDCPKGQYYDRWSKTCKCPKDLSWNGHQCAYDCGHEAEYKYGACVCKKENQVFDKHSKK
CSCKQGWYYDQHKGACKKGGY
>FGMG_007283-RA | FPrate:0.012 | OMEGA:V-238
MIPSTVLFLGLAAVANAVPFMTERDLNSTIWTPEHVLQQDEVILYGEGRMEVVHVSVYEKLLESEGVNPE
TPAIDHDWIKAGAKAKGTGKTPRDLETRQSCGSTTSYVTDRSERFVDWDVQMSPVVIGRGRNGIDVTVAS
SYSISNGVTVSAGLDLTAIKDRLGASFGVNYSRTWTTQASVLVRGTVSEGETGVVITRPWTNRRYGRAFR
GCVGSMQQTGTWMADSHEEGSYEGVRWVAGAITMCIKRQSGIPLSRCNGGGNFR
>FGMG_007115-RA | FPrate:0.014 | OMEGA:G-174
MKLQLSLLGLVVLAFAKPQDPSDPAPAPPVSSAPAPVPLPSSQSTPPTSPVPAPPADPAPAPPPADPTAA
PTPEGPICECGYTYCAAVLKAMPDKPWSDDQLSSAYCKTPNAVCNGQSPASKVDNALFICLCAQPDQKVG
DHIELLCGCDTCLNVGPDFRGRCKSPCRAGHGKGGSGGGKGGGKIRGNNRMGFW
>FGMG_005229-RA | FPrate:0.015 | OMEGA:F-332
MKSISILSVAFAALVSNVSAAGVTGTPEGFAAEATGGGNAEEPTPSPPTSWSLCSGTASEQGCAPWGTGA
GCQQAINKDGWCNNYQADAPKVDVTYDKAGLNPIVVNSDKSIVGIGANGVIKGKGLYIKGAKNIIIQNIH
ITELNPQYVWGGDAIQVDGSDLVWIDHVTTSNIGRQHIVLGTSATNRVSITNNYINGESKWSATCDGHQY
WSMYFTGSSDMVTLKNNYIFKTSGRAPKVAGNTVLHAVNNYWQGNSGHAFETSDQAKILAEGNLFQDVKA
AIEEGSTGAFFASPDASANAACSNGVGHVCEVNKYDNSGSLSGTDSSFFSTFGGKGASAKPASSITGLAT
SAGFGHI
>FGMG_002497-RA | FPrate:0.018 | OMEGA:A-405
MHLSVLLGLGAAAVTSASRNIIYYDQWHTKDLPSKDITSGVTHVMMSFANSSLFTTQPGGKYEPFQPLEK
VRSLFDHDIKVCLAVGGWGDNAGFDEGVKTDRSRERFARNVASTLDRLGFDCVDIDWEYPGGNGQDYKQV
PNSKKTYEIKAFPKLLKEIKKFIGEKELSIAVPGLERDMIAYLPTEAPLINKYVDFVNVMTYDLMNRRDH
YTTHHVSIAGAARAIDKYISLGFPPSKLVLGIPFYAKYFMTKKGYTCTEPIGCPTELLENPEDGSDTGKS
GSMTFEAANFVAAPTNLTTSTDATCGAGTFFKCPAGSCCAASGWCGSTPAHCGTGCQSAFGKCDGVDINN
SFHKALKDGRTDTVNGGQWYWDSETRIFWTWDTAELIAQKIAFMAQTRGVKSVMAWALALDSNDWSHLKA
MQQGFKDVNA
>FGMG_004449-RA | FPrate:0.018 | OMEGA:H-142
MQFLSLVLMATSALAIPAKLPSKAPAPTCMEKGTKVSEWKLTDFVYNVQKSTNTATVEFDLHNAALDYTA
NCYGKSVSKKALFDGKTDYTCKVPNGADSATFKYNHKKGVISIFQHWACVQEGGWFEAIGNRTSTETKSN
CHFTTKSETCTKASFTVPVLEMRAVL
>FGMG_005117-RA | FPrate:0.018 | OMEGA:N-74
MQFTTSFIVAAFLGTAFAMPQAAPVDCPETSAIPTCGAPCITSAAAAAGCTDIACQCASSEVIQASALGC
VVGNCGIPVALSVQAAAAAVCTACA
>FGMG_005768-RA | FPrate:0.018 | OMEGA:D-311
MIFHTLAATVVAVALAGNVRASPCKPASRSTAIHLETSSIETTTIESLPTTIQFLSSATTVLSIETFTSE
AAISSVTLTSETSITFDEPTTVVPSTIEQTTLDAATTVNDLSSETAAATDTLTTVEVSVTTTAYTTTEKS
AIETVTSSSAPHCTFTGEYTNYVQNPSFDNKVNGNWVTTSPWVFLQTPWLAPNSGRDGSNAIAIKYPDGV
WSSSILQSLEGVVAGRDYVVRYYWSLQGHPLQSDECRIGASAGPDGQSSHFVYTDGEEPVQQGQFHMQEF
RITAEQDNQRLSIGFFCKTGYKGDEVRVNIDDVAVYDYYKGCDSPAEAVTKYTR
>FGMG_006835-RA | FPrate:0.018 | OMEGA:D-299
MVAIKSVFLLLALGLEALAASSPSATCTSKYGTVSIASNKIPRATTSVQTKVTVIRKVTRRVTVIVVPKA
KTTTQKVTVKSTVTATANPNVKVATSTVTDEQTTVLTRKFTTTLVATSFTTTTKVSTSTISAAPSFHPIK
EFGGYVAKKAKRDAVGDLRMAIAKSQYVQRVDCTKRIPYTSIKTTTTVVQGPRKTVAAKTSTKVVTTTQT
ETSTEYPDDVTSTVTETVFPTVTNFVSVTDTSSSTETVTVETIIPAAEPVYAACGANNMMVTANGGHPVP
YVDMTIGFGVASVGAAQGDAYKCCTSCMQTPSLFSVFPG
>FGMG_007032-RA | FPrate:0.018 | OMEGA:G-263
MHFYALIPAFITAVSAHGVVISVEGANGVSMPGLSIADGTPRDCSSNGCGSQADTAIIRDRELGTSEASA
LGRTQGNGPVDASVMIANFLGTSGSNNVPTNNGSDSGVGVEDDLSGLNRGGRNNNRKQRRQLGNLLGGLF
GGGRGGGNGEKADKPNESSVAATAGEGATSDRQINQDGAGPMRADIDATSGGTDPDAFKSAEVTNDVPGV
GFGGLSLATNTDFPLTVKMPQGMTCEGTVGGANNVCIVRVRNSAAAGPFGGSGAFTQSASARKRAIAFRL
KKRMQIVRN
>FGMG_000014-RA | FPrate:0.021 | OMEGA:K-205
MVNLGFLYALAVAVTALAAPSSVSNSLASSLDARAPKACTNPANLLQNPSFESSKISPWIYHAYYPKVTT
QKIVTGGYKSNHALQITGIAKLQNDQAYSQMKQNFTTCKVGRYQLSWSMYLAKNAAQGIDYRAPGMTVWV
TCPGGAAQVAYFTFRPNVLESYVSNPRKSSKQKVDQWVNTVVDLGTLQAGNCTLDVNWNVNGPVKGDPVS
TLTLKLDNFAIKALS
>FGMG_003813-RA | FPrate:0.021 | OMEGA:D-264
MISHNFLTGTVVLLAACLANASPCRPSSIVSSSTVVASASETATSTASIDVSHTTTGPTKSESTTETGTT
VNVETTSSASSVETTTTVIADITTTTNPITTAETTTEATTTTAAATTTSEEPEALQSIYLYARSNSDPSL
ASLGGTGFSVISDTGNSEIKYIAFTDDVSSTLFFTLSESTGKVKIGNGDRAGNLLGYYPSNDYSLPLAAE
ATLIEDSGLSPIDCDIVAGNGSGFQKLQCQFGNKGNADFWTCGSNFVLVSPGVDFTNRCPRATTSYKLDY
IEVAYV
>FGMG_007538-RA | FPrate:0.021 | OMEGA:F-381
MHSFNIILSSSLFALTQAHSVILGAQGLDSSPNSVGFQVDPEIARNCITINPCQQDATIIRDAEITANIV
NQCGRTEISGNIDVGENTENAIAAKQVTQVEAGGELTVTIHQVNADGAGPYVCDLDESSNTNTNIQNLTV
TNNIPGTNGLSQAKTQAFNITVKMPDDLNCFGASTGNICTVRCRNNALAGPFGGCFAVQQADTDKKTNTP
QNIKTTQTLNGINAQILQNQKDFEDSVAANENATSDEAAQNKAAVDALLGATVVTSAFATETPTVDLGRP
PVATPDPNEGKDGQAGDNNGGNNGGNNGGNNGGNNGGNNGGNGGNNGGNNGGNGGNGGQGNNGQGGQGNN
QGGNGGNGGNRGGNRGGNGGNPFGGNGGNPFAGGNGQKAKRGFSIRRMSKRTVF
>FGMG_000843-RA | FPrate:0.026 | OMEGA:W-207
MIAFTLLLSFLVALVAAKPTTCAKGAHVIVARGSLEPQGPGAMGELAEKVLKLVPGSDIESLVYPALYNE
YLESQPVGVRTLTSVIQAYVKNCPKTQLVLMGYSQGAHVIMDTICGASSTGFPATLPQPSFVTDKISSVI
LLGDPSLTEGQTFHVGTSVGSGMFPRNLPAGCDSIAKKTVSVCDKGDPFCEAGGKDLSVHLGYIPVWGDY
VVKESVRLAKAFIKKAKAC
>FGMG_002157-RA | FPrate:0.026 | OMEGA:C-152
MVSSRLFTGFIALASFHAANAGACRPRSSTAIVSGTDITLTTAKTSFQTSIETETSSVTAQETTTLETTF
SFTSVETSVETSFVTEDDLTTTLESTQDLDFTTDITSFITLPAETTTSELPATTSGFVPADLFPCESAQS
CSAVEFCDQTRCGCVDGFCKLIDIDIDVPIRRRRLH
>FGMG_002297-RA | FPrate:0.026 | OMEGA:R-469
MHCVGVGFWALCALANAEIPSSCCSELQRISQLNGAVYMPGTIEYEERLDTYYSANAASHSSCMVMPRTT
EDVSAIMKVITDNQCPFGMSSGKHSAYQNSNAVEDGITVDFGYMNQTWYDTKTRIASIQPGSNWGHVYEA
LEPYGVTAVGGRASPVGVGGFITGGGYSFHANVRGFGCNQVVNFEVVLSDGRIVNANKTHNPDLWKSLKG
GSGNLGFVTRIDQRVVESNQLWAGFIYFEASRRDVVFEKYINFVENNDKDPASQLTASMQWDGEQYHLLS
VVSNSDAVESPSSFSDLFRVPSISNTTAKGKIADLVPQFTGPTPLGLYANWMTGTTSNDIRIMKFVYEKF
EECVDRMRAAVPSSKFNVLVQFQPMTPSMVKQGQESGGDILGLENIIAEGPWLMWLIAVTADTKETQDMI
DPIRQEFKAAVDAYATELGIREDWVYLNYATGDQDPISHYGSDSIAVIRKASEKYDPNGVFQHLRRSGFK
ISK
>FGMG_004126-RA | FPrate:0.026 | OMEGA:S-255
MRSPVVLRLALSLFAAGSAVAGPCKPTSVTTTSEGIPVASTDTSSVVSATSSTVDFSATSVGTESSTETY
VSSSLETSSFATTETSATTTFITELSTIESTTMEPTTTEGTTTVPATTESMPTPTFTIFATGESVIEGDA
LHTFDTDGYVATFDPNAVFGETSVRPYSIDSQGRLVNDQGYFLCATYVATNKELNAPAVVGTCTSNGPKK
AFLDCTLSSDLALRCGIPGQSCVSNPVGEHICEVSGTWSTLSTGSVIVGHALKIGLVDIPVTPVAHELIG
LRASIV
>FGMG_007027-RA | FPrate:0.026 | OMEGA:T-70
MVNPLYVLSALCVVAGVQACKRTCSATGDSAGTCSYNCTHVCSSISANEARNTFLAALQSSGNSCSAVGT
SAIQCTKTANFGSCYNHYWSCGRGC
>FGMG_012039-RA | FPrate:0.026 | OMEGA:D-379
MVASKLFLAAIAFGPVAAGPCRPSPSKALSSTTDFSSSSLVSLSDSSFSSEPTYDASTSKELGPETTTNT
AAETSLISITVTLESTTTIPTDSQGTVADATSDTKTETTAEGTSTMETTPTNDIASTALETTTEGSGSAS
TATVTTGTATTEPTTTIAESTVESESSSVQATAASEATTEPTEAITTTTEATTATTEATTTTAEPTTTTE
AITTTAAETTTTEATTTTTSMEPISTTINLLVQGGAMANGAPLYSNGQDALVLNSQSSASWLTSYSTAPL
SYDPITQHLLLGNKRLCLMYNTIAIASFAVCQGPPTGQYFELTCDDPSAGSLRCNVPAKQYISKDNIFVD
TGGIWNQFYLLEVNRQFSPGVYRIIIGKDNLSSTDDIKYQAFERITVGTRKV
>FGMG_001870-RA | FPrate:0.036 | OMEGA:Y-211
MLDLKTLLLLPIFLGVAVAGPAVPVQALAVRQGNKLPNCDDKSQTYNGRYADNSGTYVTSDKITHPYKFP
LIRKCWWDYYVVEAAPELTPWQKATGNIYCTNSERCVATKMSGKSVCQERSESVSASVGVAIEGFSLGVD
FTVTKSESRCVTADDSTACSWNDGQCHTIWTQQQILRQKGYRRQRCDWGNGDETQCMGDWEQTTPSDLIN
YGCGSKCTDTNDCGHTDGTPCP
>FGMG_002533-RA | FPrate:0.036 | OMEGA:N-66
MRATTVMTALFAVAVNAAALPADSEAADVHVDVDAHVGTISTALEKRGNCDHGYFDCVTSQQIFCNFLGI
CGSGIPAIACTQQCIQRINEDCRRWCN
>FGMG_003712-RA | FPrate:0.043 | OMEGA:N-176
MKFTTPLVVLQSVACAAFTLPDNLPNGVYRAHVNTEGLEVSEGVTVDYKTTVTPRKTTNLLKSRQTKDEG
GWDRDQPDMWCGCGLSMNHGNCDTAVDMLKAQFDRSDGGVGEVTQAWYSIYGDVVAFCCAQGTFPLFSSQ
YADYLARITDRCGWYVPGTFSPSSIGLSAVDCGYMNYSPGLDFCGNAEIGRHMGDKGRC
>FGMG_003897-RA | FPrate:0.043 | OMEGA:S-181
MLRNTLVLAALAINAAAGPCRPSTSSIELLSTTIGLTEASYETSLTEETSSASVTETADVVPTTTIAIAS
SEATTTAEAIPTSDSESTTTSVDGCVASLTAAGGEPRQTDRIADCQDFNVVTVSSYAVTQTVYKRGNVII
IPTNAIRRRAEGDAATTILPTGIPAYATYCNGPAAYYEACSAFGVTAFTTTIPEPTSTEIIITN
>FGMG_004514-RA | FPrate:0.043 | OMEGA:W-76
MCGYVLFLNLCGCFGELLFDTACPLIYQEINRINNAEAWTADTINELPFEVPDYCVPGWHNTWIISSHEV
CSPQWWSNCPSVTVPGYPQFCHAGNGGI
>FGMG_012071-RA | FPrate:0.043 | OMEGA:D-227
MVKIASLVALAAPLVAAAPNPQNSPQIVGGTSASAGEFPFIVSITNNGGPWCGGTLLNANTVMTASHCVQ
GRSASAFAIRVGSNSRTSGGVTSRVSSIRMHPSFSGSTLNNDVALLKLSTSIPAGGSIAYGRLATSGSDP
AAGSSLTVAGWGDTSEGGGVSPVNLLKVTVPVVSRATCRSQYGTSAITDNMFCAGVTGGGKDACQGDSGG
PIVDSSKTVVGIVSWGDGCARPNAAGVYARVGTLRSWIDSNA
>FGMG_002378-RA | FPrate:0.050 | OMEGA:S-84
MKFSIVATVLLAQGIAAMPWSSVKEAGQRARKSRKFILNTFRLHHHTMVSGDSGHGLTSKPLKKMTTTYP
VCWDMCQSKSIPCSGDWESKKRDDVDDTCWTCCLKGTTDL
>FGMG_003700-RA | FPrate:0.050 | OMEGA:Y-77
MTISFTKVLLLLTSAVALTTANPIPDEAHNTTSADMGILAKPDFFCNDNELSKKCRGPPYNFRCTNDNHI
NYDEPYYQCRDKTRCSCHYPCNNIKIC
>FGMG_006881-RA | FPrate:0.050 | OMEGA:C-124
MPSTKTIAVAVAALAASGVSANKCNPSACTTYDLKTESEIEAEELNCNKRGAFKDTDSYSLPSWSMYDCA
KSCYDYEQFTCQQFSFTPGEEAGIQGFCTLYPDNEIPGNIRGPLAYYDKKCFKCSPPPSRGGRGGAKIRG
RIRRS
>FGMG_009701-RA | FPrate:0.050 | OMEGA:A-478
MRFSTVSFLLLAGCSTGIPHEIRGGHEVNGASGGHLEKPLSRAERRSTDLQVDGSRALTVRSDAYEGPID
GTEEEDIDLEELEEIEMGKGLKGRAIDPETDPDSAHLVPRAKGEKVSLDQLTNSRYKKPHAEIALIHAYN
KYRKPLPNQELKKIAVQEEAFVKNKLGMKGSAAAAPPAYYDSQYVVPVQIGSPQQTTYLNFDTGSSDLWV
FSTDTYQPDQAGHILYKPDKSKKCKRLNGQTWSIKYGDGTGASGIVYLDTVRVGKTLVNQMAVQSATEVS
DGIASDTFAHGILGLAMSSLNTVRPDPQKTYFDRVQDALEVPIFTANLKKGSAGNYNFGYLDQSEYYGSV
GFATVKKDSPWWQITVEGFRVAQGAPWHKYKYSAIVDTGTTLLLLPDYLVKFYYKKVKGAYIDDEYGVWV
FPCTAKLPSFYFGFGNYRGKVPGHYINYGRLTSTVCYGGIQTSEGIGFAILGDILLKAQFVIFDLKKNRV
GFANKNTVKA
>FGMG_009951-RA | FPrate:0.050 | OMEGA:V-137
MLSSNVVRALALFIAAANANPCRPTTTAPGITSEVTSTATVIESTTDISSTIVESSTETETTDVPTTTVV
IIGEPTTTTAIIEEPTSTTAAAEEPTTTTVVIEGTTTTEAAITTTTAAGDDVNLCSSSDECAYLQPVRCL
DGLLNICICQNNRCIGAA
>FGMG_011488-RA | FPrate:0.050 | OMEGA:L-88
PTCHNPLLPVCLFILTLTNTGTYQGRHFDTSWFCEENLFPNSLISTKSILRIEKIFRLGVLDHPKSKIGS
RISECELDQNLYGCLQLLGRFRIRRDKDVIAPCWVCTI
>FGMG_000247-RA | FPrate:0.060 | OMEGA:G-110
MHFSSILPIVAVITGLTSANPTPDEPVLETRTDGGIELIELDLGKGKSYTGVGRPGKCYNLPWNIKSFHA
YSDDTKSVISCFDCRVYTKSNCGGSYVTLGGQQKAFMEKGERNRSTRAGSASVRRSGRVAGK
>FGMG_002230-RA | FPrate:0.060 | OMEGA:W-46
MRCPLSLSGLLVLVSFSPNSLVHASLPEMVIPLLGSNPCTWGPSFWCASEENMKRCGVTQEECEKYTNDVY
>FGMG_004902-RA | FPrate:0.060 | OMEGA:K-330
MVAIKTLWTAVLLAGVALVESKACKKPFIRREWRSLSLSERDRYIKAQKCLMNKPSQSSPSDIPGARNRW
DDFLGTHIINADDVHFVGVFYPYHRLLMHAYEQELQACGWKGGVPYWDWTLDAAGPDNDTSVFYDSPIFD
NKHGFGGNGAWVPGKFSNPEPGLPVNPPWDVPDRSGGGCIKKGPFAGLKSNLGPGNGTAYNPNCIRRDFA
PLSFRDMSGPDAIEDGMRQKDFGFFDRVTESTFHSGGHWGVGGLYGTMTDKWQSPADPLFWVHHANVDRA
WWSWQIRDLKKREKDVSGPLVNFDYANQAAGNVTLNHPIAIFETRQLKAKVKDVMHIRKGLLCYDYEDTY
>FGMG_005534-RA | FPrate:0.060 | OMEGA:A-377
MLSLKSLSASLVGVLSLSASAAAAASNSELVASTYFAGFHANRGFPVSAMPWDKYTDAKYSFAETTEDGG
LDLSKSQPEELSCFVNAAKKNGVKALVSIGGWTGARYFSTNFGNEKNRTAFVKTCVDFVKEHSLDGLDFD
WEYPNRQGLGCNTINENDTANFLEFLKELRKDPVGKDLFLTAAGSLLPWNDKAGAPSKDLGGFADVLDYI
MIMNYDLYGAWANVAGPNAALYRSCDDRNTMGSGDEAIVLGMPNYGHGFKVNATSAYNKNHKLNLYPVQN
STDRFQGSSWDNDPLIDACGNPNPPGGTYPFWSLIKEAKFLDASGNPAPGIAYTWDKCSKTPFLYDEEKQ
IYVSYDNARSFAEKGKFVKAKGLGGFATYEAGGDYNNILIDAVRAAVGLS
>FGMG_011826-RA | FPrate:0.060 | OMEGA:V-67
MKVATIALFLLGTVAAAPSDKGTDKPTGMNTTAVVNKASCSIACNFWYSKCYYRPWAYTCDDRGNFVRRG
WNPDCDEHCWCQCDAKA
>FGMG_012099-RA | FPrate:0.060 | OMEGA:D-265
MKLTAVFRNIAFLAVSADAFNPRAAPTTPKKQKDLWVPEVGAKWEIILSQVFKFPKGGATKLDPSVTVYD
LDLFENSKNTFSALQKAGKHVICYFSAGSWEDWRDDKDEFPAKDLGKTMDGWPDEKWVNIRSTAVRAIMA
KRIKVAADKGCDAIDPDNMDGYQNDNGLGLTEADTISYVKFLSQEAAKYNMVMGMKNGGDVTEQVLPYVA
FSINEQCIQYKECGLYAPYIEADKPVFNIEYPKGAPKVKASDKKRICSTTGAAADSDNFSKIIKKMNLDS
WSMYC
>FGMG_002475-RA | FPrate:0.074 | OMEGA:S-376
MFSTSILLPALLCLTQTVSSHPACRPEMNNKAAAMAKAVYILTNDETNGVLALPVGNDGTLSKGKVAKTG
GAGSIAVDADGNPATPDALVAQSALTVAGNMVFAVNAGSNTLSMLTVSRSDPTKLEMVGKPVDLPGEFPN
TVAASAKSRVVCVGMTGAKAGVSCASFSNKGLGAMDELRPFDIKQTTPPKGPTNTVSQVLFSDDDSMLFA
MVKGDPAVNNTGFMASFNVEKVNGAMAVSMNEARSSPEGTAVLFGSQVIPGTSKVFATDASFGAAILDVD
AKTCEATTVATGAVEGQAATCWVAISPVTKTAFVTDVGRNRVVEMSLEDASVVSELDLTCNGDPGLIDLA
AAGNFIYALSPGNGTTEAAVTVLDVSGGSGSAKMVQHFELKGMAGKTAMGMKVMM
>FGMG_003721-RA | FPrate:0.074 | OMEGA:N-345
MHLATFLAVGLLPALPYARSIPSRRGVDCSFHTSPDSGATCATFADAWGMSEDDLKALNTGIKCPNIDTG
ATYCVIGSVNDDPDEPSPTAVGPKSTAAASTKVMSVIKTTPTAVSPTVPQKPSTTEQPSGNGIKTPDAIQ
EGMVTNCNKFHEVKDTTTCQGILNYNKISLADFVKWNPAVGKDCSKLWKGTSACVGVIGSTPSPTGATKP
SPTKATPGNGIKTPEAIQEGMVSNCNKFHEVKDTTTCQGIVEYNKITLADFIKWNPAVGKDCSKLWKGTS
ACVGVIGSKPQPTATAPSNGIKTPSPIQAGMVKNCVTFHYISSTTTCQALLKYRKITMEQLFKWNPAVKK
DCSGLWKDTHACVAVK
>FGMG_004823-RA | FPrate:0.074 | OMEGA:D-406
MPRLAQVLLAAGVTLLGLTSAQCNLTPKASIATADGVEQKLLRTGLQRPRHLVVDTEGNLLIAESGNKGV
RRVVLDGGKDLDVCIDSDKALISDANLNHGIALTADGKTILVSSPSEVYAYDYDASKGSVGSRRTVITGM
DGSATHSTRTLTIPLAGNPNLLLVAGGSDGNLDTATVDKNVVRSQVRVFKIDELLSAEAPLEYGKASLFG
WGLRNSVGWAEDPSTGNIWSVENSVDNLYRGDVDIHNNNPGEEFNFHGLPNDTSSAQYGANYGYPGCFAI
YDTSNVKEYPGGAEVGKQMAATPQGEKDLGFTDEECQEKQAPRITFGSHLAPLDVKFRDGSAAYISFHGS
WNRNPGDGYRVSKVDFANGKPVSSSKDPKAEVPLMWNTDNTKCPSGCFRPAGLAFDKAGRLFMTSDSTGE
LYVLTGV
>FGMG_005022-RA | FPrate:0.074 | OMEGA:K-360
MRVFFPIVALAGLGLAADMNVWDLDDSCQTAERKGAFDKAYSDAEVLAVKAQGDLETLKGARPDFVSNMR
TNWDRIARAVTNMFGFVPNKGGHDPNEEHYSNVRYVYDRMVKTLHNDEMIPANGYGGLKPLLLCDESKFV
WVGRDDKDPYDPAGRLLRESRPKEMAGQTAGAWVYKKRYLVNAVKQASTGLCRPGVFAITLTRNDFIIFC
PPSFKDEVAQTKSAVDAKDGVQKDDALDTYSATSLSRVMVHELAHWFGGDKTGGPENRNVPDQQAVGKEG
ALVYQKPDGKRTTDASVPGVKKYVTYNFLWVSNLARSHEGPNAGNCGPSKATFTAESYALFALMSYMDDW
DWANDGKAKKFTDEMIPYERLPNGKKARLG
>FGMG_006975-RA | FPrate:0.074 | OMEGA:V-89
MQFNIASLCLLAFSLPATIAQRTEENAVTIKTFPNQIGCGWGVSGHTDSFPDGECIHLPRDFMDVKRITE
TCRIFIYRANDCSRLEKQVHQGDNCIDIRDYQSIKAFCH
>FGMG_007290-RA | FPrate:0.074 | OMEGA:D-127
MHISAISLLALAAGAVALPTSEKSESLEKRCEWHDGHGPISCDYFSIVFGAEGRERSEFIMKGNNFEMRG
FPRCDPWRGHIFQNFESPLPFVLQVAPGNTCETRFPEAWWDDLHIRYASTFVNAPTDTRCGPVENGWGRR
CIIAQRP
>FGMG_011943-RA | FPrate:0.074 | OMEGA:G-87
MLAKVFSVVLFLSVATAKLHNNCACHNGDSYNYRMTMNACTVYDDADYKWGGVKYDTPSGRCTQENAEAQ
IAGDQWEDACKEVAAKGFPCADGKGTCFANPKEVRGRC
>FGMG_002296-RA | FPrate:0.091 | OMEGA:S-189
MKAVTSLVLHCAAVTVAAAALPDGSQVLADPLEGYEIVPMQWKGVIKEGEAPVSLNGTIESVISQIKELN
PEFELVEEDTAESSGLEARNPSNIICNVGGTGYVDVKAAQREQRYLRSLGTSVCGVDGGPGKCARVSCSY
GDAIWLCNDNSHYIQPRCSYLADYVDRIIASCQSKTSSPPCTVRPCAPSWTAWFVRGQQFDTDRYNVIVG
RSNC
>FGMG_002322-RA | FPrate:0.091 | OMEGA:S-321
MTPVALVLGIFSFSAFAQAGNTPGLPFVINTWGGDFTAATDAAFNSLQKSKTSAIDAVEAGGLTCERNQC
DGSVGFGGSPDENCETTLDAMIMDGDSMNTGAVAALRRVKDAISVARHVLEYTSHSLLAGDQATQFAIEN
GFKTTNLTTKASAKKCKEWKASKCQPNYRLNVSPNPEHFCGPYRPLAKNKQTQQKTQSSHDTLSLVAITK
DGSLAAGTTTNGASHKIPGRVGDGPIVGSGSYADSSIGGCGATGDGDIMLRFLPCYQALDSLSRGLSPKE
AAEDAVLRMVRKYSDLKSGIVVVDRYGNHGAAASGWDFTYSYRGGKMKKTKVVKVKPVQEV
>FGMG_002505-RA | FPrate:0.091 | OMEGA:E-309
MVAFKPALLLLLTLSNEALRVTSDILCTSKLGTASIASNKNSRATITIKNQVTVIKRIIRKANVIVVPQP
RTTTITETAKNTVTTDAAPEVEVATSVVTSTQTQRVTAYTTTTSTSTSYSATTKWSTKTVAAPIGFKYLK
SSDSQWVPKKLRVRKNQEVSPIIPPESLHVQRVDCTKRVPSTTIKTVTTTIPGPRKTLAPRTKTKVTTTT
EIVTHTNYPPKVTETILETVSPITVVRDTVTRQAPSVSTEIITVETILPAPDIYEACGADAFISSANGGR
GIIMTPNMGYLEEEIAGGATSGAYNCCVECMKRPRCFSSRTSSDSTCLH
>FGMG_004889-RA | FPrate:0.091 | OMEGA:N-474
MQLQSILALGIVTTARLAVAGPCDIYNSGGTPCIAAHSTTRSLYSNYNGGLYQIKRASDSSTTDIKPLAK
GGVADASAQDTFCSGTTCLITIIYDQSGRSNHLTQAPPGGFNGPEANGYDNLASADGAPVTLNGKKAYGV
FISPGTGYRNNHVSGSATGDQPEGMYAVLDGTHYNGGCCFDYGNAEISSKDTGNGHMEAIYFGDNTVWGS
GSGKGPWIMADLENGLFSGKNPKNNAADPSINDRFISAVVKGKPGTWSIRGGNAASGGLSTFYNGAYPDG
GYNPMKKEGAIILGIGGDNSVGAQGTFYEGVMTSGYPSDATENAVQADIVAAKYATTSMTSGTALSVGSS
VSLKVTTSGYTDRYLAHTNSDVNTQVVSASSTATLRKQASWTVRTGLANSGCVSFESVDTPGSFLRHFSF
ILVVNKNDGTKAFNEDATFCPQKGLNNQGSSIRSWNYPTRYFRHYNNKGYAASNGGVHDFDADKSFTDDA
SFVVAKSLA
>FGMG_006537-RA | FPrate:0.091 | OMEGA:M-279
MKLSSGALALGLANLPSTLAWGSLGHMTTAYLASHFVANTTEAHFKYILYNDEEDYLAKIASWADSIRYT
NWGRFSKNFHFIDAHDRPPHNCDVDYERDCKDDGCVITALHNYTQQSVEPELPFWRRNQAAKFVVHFVGD
LHQPLHNEDVEKGGNGLSVIFDGKHFNLHHVWDSSIAEKLLGGLHGDPSKLANKWANQLAVEITDGKYAE
AKESWLKDLDFEKPIDTALAWSRETNALVCTYVLPEGPDAIVGQELGGEYYEKAAPVLEEQVAKAGYRMA
AWLDKIVEAYKDAEQKQISEEL
>FGMG_006972-RA | FPrate:0.091 | OMEGA:C-88
MRLAAIIAATGVIFTASVSGLACKDGIKYCSYNLNSGGHFWTEDEIWSQLQSEGLPDGYTKGHIQHTLFK
CQDRWYWSKAHLYYVEWCANSCQNGGGGKDDLCRPHAND
>FGMG_007066-RA | FPrate:0.091 | OMEGA:I-136
MLYSSFLLGLAATVSAVDIRFYSNDQGACYSGPWVGCAGSNPQNCCVVAGRFSATVGIVAVPSDWTLTGI
GYRGAGCETWNQAAIGRGRDFCLGATGWSFSGAFYRFGDSKRSADECEISQKANQLGLEDGSIYDIADLT
DDQIEEMCDPGDKRNSH
>FGMG_012364-RA | FPrate:0.091 | OMEGA:P-133
MVQLNIGAGFLSLFALGVTAGPCHPGVMTTTLAIFETATATTDLTTTVQTQTIASIATTVSVPKVKPACN
IQSPQTGANGGTFQVYCDRDITGTIAVADYKVIPFSECLDYCDETPGCQGVHYIMTMTNICIPYALIGTV
GGTFVDKEDVILAIRFIPTDS
>FGMG_004196-RA | FPrate:0.109 | OMEGA:P-95
MFSKLILVVLSATAALAAPLHPRTIGSITFYHPGKGACEENHADADMVASIGRGLYDSGDYCGKTIKVTG
EAGEAIVTVVDRCDGCADNDLDISPAAFEQAMGDKDQGRVQGEWNWV
>FGMG_005099-RA | FPrate:0.109 | OMEGA:S-468
MVLVHFFLICCLSSFGFAFTHPGLLVSQSDIDRIQTKLAAKKEPWTASWEKLTSIPFGKADYKNNAVYEV
NRGQNGDALWHDAAAAFNLGLRWKVSGDEQFAEAASNILVAWADKLKVLSGGDDAYLTAGLQGYELANAV
ELLHDYKPFVESGRPKVIQLLNELFLPMNLDFLNQVLGSQHNVRHFFANWEQCNIASALAIAVVTENQTT
WDFTIDYFKHGVGNGNINNAISNIVEEPGTGKLLGQGQESGRDQGHSSMNFQLLGAIGQQAWNQGEDLFA
YNNSRILLGAEYFARYNLGNDVPFEPYTNGIVSFDVISDASRGAVRPAWELLYSHYVQLKGFEAPWTTAY
LNNSLESFGGFEGGAGSWGEGSGHYDGLGWGSLLYRLEKSDVRAIKSSATTSIASSTTHKPASQTTASVV
SKPTILNEGYPQISATHAPTQTNAAEIPPVSPPKAEGPHRHTHKTKGSHHHHHHHNHHHHHTHKPKTGCR
ATQ
>FGMG_005628-RA | FPrate:0.109 | OMEGA:S-382
MKFSAAFVGLVGLAVASPFTEHDTSNGLVARGGKCDIPNKYLQYPSTPKPKKYYGYGRTIHVKSGQKIQN
AIKNASPGDRIVVAAGDYREQLVIDKDGIQLEGHGANLIQPDAKDLKTNACTGLTQDPQKNKLQTGICIV
GYNVKTDDFITEHKKVKSVGRPVKGVSVTGFTVNGFSGINIAILGAKNTYITNNKLVDGGAYGGLTLGSI
NTVFYDNVVTTTKGGFIAICMDNKSDVFSKKNDISNHAIGLCVQTNGAVLEYNKLTNNCYGVFVDPGVRE
AKITHNYIGPTPAPCGKNSAGIVLGSSIGVLVSDNTIEGQKASDGSGAGIRIYDDPCVATADMPISLACV
VLGKAIKARDNVVVRNTLNDNDSDIQNLSKGSGNIIKCNTCKNEANIKAGQCKKP
>FGMG_007018-RA | FPrate:0.109 | OMEGA:S-310
MVALESFLLFCALSTEALAAAAPEPTCATALGLNSVKVVPRATTTGVEKITIVKKFIRKVKVIVVSRPKT
TTVKIAEYTTTTEIADAATQTATSTEYSTSTSTTVTTSDSTTYTTVYVTSTVPAPAGFTPILKDTSYVAK
RKTTTVTAQGPRVTLKAATKTVMSTVYSTITTVSYPPDVSTTTTTTIYPTTTSWTSTTSTSTVTNTVTIE
SNIPRSTVYATCSSNNVLTTDNNGGRVVAWRNVLPTDNLPTYLGMGFTPETCCNECQKRPFCRITLLDNS
NNGARYIYVTGTSATCANGAQPYFGSYITSTHAPQTPHWIYSNGPCGRLTNGGGA
>FGMG_009697-RA | FPrate:0.109 | OMEGA:C-291
MKNAAAILALLPLVAAHGFIKSPAPRRPGDAYKAACGDQPFYQQSSDINGNVQGIKQVVGQDFKAADCNL
WLCKGFQFDDNKDNVQKYSLGEKIPFEINIAAPHTGYANVSVVKTSSDTMIGEPLIEFENYAANAGTASN
NTAFSVTLPTSLGGDCTKAGECVLQWFWDAPDINQTYESCVDFVVGAGSGSAPAPSSGSGAEKPATSAPA
AEQPAATSAAAEADDEDCDDEEEPAASTTAVAEKPAATTLQAVAISSAADSGSAQPTSAPGSDDDEDCDD
EEPIADEDEDCDEEDDQDAGDDDEECPADDY
>FGMG_011972-RA | FPrate:0.109 | OMEGA:S-260
MRVQNTLGSLILSAGLCAARACAPHPQSTTATSSWTSETETATSAGSETTQIVQTTTGATTEETTIVTES
NTAVESSVTVSSSGFETSTIEVTTSVAEVPTSTTEDSATTTTSPAQSVQSPPNGNFEDPTLDPWESTGTT
AVLAKSSECYEKNQCAKLPGPYSGNTAKICQRVEIQQGYEYTFAAHVRQTCTYFDSGEQEDLDCSPFVNF
VQLTIDGVSSSSQGVDWDNQWHQYSDTFQYTGPSIDSTDLCIKGVIMQGSMYSFFVDSVSLVRGKSVPIP
EET
>FGMG_000023-RA | FPrate:0.129 | OMEGA:D-477
MVRPLVPSFVIAAVLGSLVDAGPCRPSSSSVAVILTTSESSVATGSATTQTKLSSSTDEPSGASTETFLT
ASEQSTTSTDSALSTAITITTSASYSSTGTALEPSTTTECPIPEPPVYNDPFTAAYTEEPLQTVTEVAVE
FVPRGRARRDARNVLARAATTSAEAISTTEDTTTTTETTAVTTSEETTATTEDAITATQDTTTTTEDATV
TTETTTATASEAASGCVNNLQKPSPESSVCGAKGYAWSGSDDWRYLGQGSSSSLLDCYRSCMQKSNCVTF
LYEKNMQCNLYRGTVTELSPDETTFKTYETRCFCDTDIEPVPTCSYDTSIGFNDGRFAPWQADPNPGGKD
PVAFRVVPGDEGDPSYRFQTGQFDFDKGMWIYQDVKACPGTRFYCSYRWKWDQYYSIRQNNGGSLVPYVR
VYQDDDRIGNRYPTSASETKTWINAQFQFTIPESGETRIWFIASSPQGEWINNSDDDCMPEWVHRPNSFA
LDSVQCSS
>FGMG_000134-RA | FPrate:0.129 | OMEGA:S-184
MPRLSILAGSVVLLAFSGVNAGPCRPSSSIVTTSLETTAAPTEVGESTASLASTSSIEPEVTETIFVSVS
VTETTNVIAETTGTASNTADLITTTTTAETTTAAVSKCTAAPLPENPRACQNIPNPHMAPNCVSFNIACD
TMLDFYFGEKYLSASSFEECVSKCAQDVECSGVQYTKAGSVCMSVADSLGSNGNTPAYDVAYKRGE
>FGMG_002826-RA | FPrate:0.129 | OMEGA:S-335
MRSFALLALVGPLAVSAASGSGHSTRYWDCCKPSCSWSGKAKVSAPALTCDKKDNPITNLNAVNGCESGG
SAFACTNYSPWAVNDDLAYGFTATKLAGGTEASWCCACYALTFTTGPVKGKKMIVQSTNTGGDLGDNHFD
LMMPGGGVGIFDGCTSEFGKPLGGAQYGGISSRSQCDSFPELLKDGCHWRFDWFKNADNPDFTFEQVQCP
KELLAISGCKRDDDSSFPAFKGNTTPSNAKPSGEKSAAAAQPQKPSTKAATEPIATKPATVKPAPVKPTK
VVNKPKTASKVGGTKTRGKCPATKPTKPAAPQKSAVAIYHQCGGSKSAYPDGSLSCASGSKCVKMNDYYS
QCVPN
>FGMG_004708-RA | FPrate:0.129 | OMEGA:D-321
MRTSFSTVLALAAALPTALAHYNFEALIVNGEVTEPYQYVRKTTNNNSPITDVTSKDIVCNAGGLDKDIR
AATKTMKVSPGDEVGFTVASEMGHPGPLSVYLSKAPDGTEASDYLGDDEWFKVYEMTWKKIGADGVEWAN
YMNGQSGGIKNFTFTLPKDTPKGTYLMRAEHVGLHGAGEKNGAQFYIGCAQITVDGNGAGKPSPMVKLPG
AFKATDPSLLLSIYYPPVTKYDAPGPRPWPNACTDHTPNFAGQASDGDCTGDKKGAGSDSGSAAPVASDA
PAASAPAAEAPATSAPAATPTAAAVTTSAAAAPVATKTPSDKCKAKRAAKRALKAKRALKK
>FGMG_004714-RA | FPrate:0.129 | OMEGA:T-150
MRFTAFLLPIVLGAVSAGPCRPSSAESSAETTELGSVTTTDLFQTITTTLSTDDATTAAPTTETESASAT
TQMIESTIESAAATSSTTAASRQCIAPASLQCCLSVGKANDGPVGLILGLLGIVIKDLSIPIGLTCSSVP
NAEACGANRTPVCCSDNSHGGLVAIGCTSV
>FGMG_006804-RA | FPrate:0.129 | OMEGA:S-162
MIFTNFIAGAIALSVGVSAGPCRISSQTTGTAATTTAEASLATSTVLTTTALDFTTDLTTFLTLTGTTTA
ETTSAAEETTSAAEETTAAAEGTTTAADETTAIETTAVDTTTLEATTTVEATTTAEVITTQATSAAPEAT
TSSAVTVQCNTNEECDPLLDVSGMSCMENNCECRTDHLCHVIVY
>FGMG_007175-RA | FPrate:0.129 | OMEGA:I-440
MKFSIATLAAVIAASAPTVMADSWQCNGSWNDGGLKRLSFLFDGYCENQSGQCFLSALRGKGLTVHNWQA
WDRGDGWWQVDFSTTAGLAWQANNAIEQVTGSWRGCWPNHRPMFPASHLITTTLLDLTLVCKAVYPIASR
LLWQNCLRIESNESLRLFRDFISRESVVTGRRPCEAYGSTRLFLAPFGVSRLSSSEPESINEEAFDPISY
SPVSPYQPELKDMGTAEAVNEVLITLAPVLKAIIVEMPLRSLWPDDDDTGIRRVLREGFEALVNVEELVS
INDELYLDTNEDGSELEVWTKWPKLRRLALYNVVAGPELWKNMLLCPQLEIAVFPRADPSGNKMSEENIK
DDWSRAWTEATSQRTMSFEDRIPYRGRNIDIAFYDWETEFPNFDAFTDSWGRLDPDNLIRIMTVPFNQPY
DPALARHEYHPFKNYPKVWIRGCALSGSIWDAVYRERYST
>FGMG_010483-RA | FPrate:0.129 | OMEGA:S-446
MVRFTPLAALALVPLAQARFDWLYARDTIAQCPPCTVEGEAQECSHTVTVTEPASPYETITVSDPKDSYH
TVTFTEYGEPGKTITITQNYQEPQTVTVTAPGKVVTVTKTETSEHVVTKQVKVYPDPGNSNGNGYNPGPK
TVTISNGHPAPSADSPGYDGAVVTKIVGDGDNVKYTNDAHTVTVIDDGKVKTLTYTDGHYNTVIKTVTQD
DGEEKVVTVTNRDDYEVVNTVTLKDGKKIIKTVTAENTNNYVITKTTHEDGKYHTVIVKPEPTVRTITND
NGDYVTTVVETPHAYTLTAPIRYGSPSSTDDDCETITRTATYAGQPEVEIIVYDPESGDSTCTKEDGQPC
RPDYENDKTGYDDDGKDQEGDDSKGQYEVPAYTKVQSGSDGYNSNVPVYTKIRTYGNGDTYTEVHGADPT
GCESFAVSTSIATVYNTVVVTVEPSSTPASDDRVPKKARSPLSVRW
>FGMG_012093-RA | FPrate:0.129 | OMEGA:S-399
HDETLRDPLLALGCLIGNAAAAWPNGPFKTSGRWIVNANNEKVKLAGANWPGHGEVMVPEGLQYQSIKGV
LSDIKGIGMNAIRLTFATEMVDQIYANGGKDIDIKTAFEEGLGKENGTIVLAKVLKNNPTFTAKTTRLEV
YDAIAAECLRQQIYINLDNHISEGKWCCGGEDGNTWWGDTQFDTAKWVRGGAYMAAHAKKWPAKVSQSLR
NEPREPTNNNKLRDASYNWSDLYKYMRQGADAVHQADPNAIIVISGMNYDTYVTPLYSGEKMQPRGEVFN
RDDFKGYGKDKLVLEIHTYENKGTSCPSLRYNLYNKGFQAMNESDPNVAEVFPVMLTEFGQAMNGADYET
AKTYVSCLSQYLPEMQASWFIWVIVGRYYTRQGIQEFDDSWGMKKPDWSGWRNDQYIETYLKPQIKGTLR
>FGMG_003334-RA | FPrate:0.154 | OMEGA:H-139
MKSFSLITLFCTLVTAAVIPRDTVFDGHCCFTLHDVANDAAVQENSNGNLLLNAGSTNGFFCIDLSNSQN
ILRDRSFNACFLNPSGEVKCVDPTPGFESWTLKKSGSNTLLHRDGATAFNSCSKTSTSSKGTVLFGDKHT
GASTCKKTTLKVKNLKGTCKNF
>FGMG_004614-RA | FPrate:0.154 | OMEGA:S-63
MKFITSLVILSAATVSAKPAGNKECTGIYQRCLETITPDECPKGDRDCLCQAWDDMVTYVKPSNAWSLVP
IRRDSGFQKKIRGDFANRSWK
>FGMG_005350-RA | FPrate:0.154 | OMEGA:V-233
MTFTKALVPLALFLAKAQADAFSSCSKDLPLSCHNTTAVENTCCFVPAGQLLQTQFWDSSPAAGPSDSWT
IHGLWPDYCDGTYPQFCDKSREYTDIKSIVSKFLGNSTLSYMDKYWVSQDGNDESLWEHEFNKHGTCIST
LEPSCYSNYQTGEEAADYVKKTISLFKTLPTYKWLAEAGIEPSTDKTFTASEIEDALASQHGARVTIGCQ
GSTLSEVWYHFNVQGSIQEGQFVATEPDGSKSSCPDSGIKYAPKN
>FGMG_005410-RA | FPrate:0.154 | OMEGA:K-64
MKCSVALFLLSAVRVTAQAANCGEVDACLKAGPNPAACYDNERCLCGTHKEINLCYLHCDSNPKAKAAQA
DVDKYCAVLRKRRSKPL
>FGMG_006952-RA | FPrate:0.154 | OMEGA:C-239
MRCGVLHSLAIGLASLHVSFASVCKPRSSDTPASGFSSIETATELATSSLTVSSVSSAAFTSTATDAIST
KATTIAESASTLEIITTETATAAVSTTETDTAETTVTSGTISESVDLPTTVEATTAAPSNTAVPLFRVTA
QSGPTGGQTLLADRNGYSVLLYDNSEGDFSDAFFAVDPVTNYLMLDNKQPICGYFGDNNGLAYWVRCDTS
PTIEQAKLTCEIPISDGEVLECRVPEIICDNDCVPTGKHGVLHIPTRGD
>FGMG_007073-RA | FPrate:0.154 | OMEGA:C-159
MHFTTFLTTVVAAGMASATTYNAAAVSSNKNINGSALQASKSGFALKLKNQGAACDSGLKENKVTFSLNK
DGELNLYTFQNSQVAYVDRSGMGQGKLGYATIADKGLVIPKNGETKGWKVAANGDLTFAGKGLIACPYDG
SYSLWVDAGVKNPGGNSDCQAVTIRAKKDDKAVACQYSV
>FGMG_008260-RA | FPrate:0.154 | OMEGA:K-313
MKLSSALCCVFATLTVAFPSDYLKIATWGVEGYAKDNPIGVTTGGKGGKTVTVTTAEQLVEAVKGNAPKI
VKLKGKIVLPARLAVGSNTSLVGVGLSAHITGKGLNIYNGDNVIVQNLKITEILDNDCITIRNSTRVWID
HNEFSSDIDGGPDKYDGQIDIIRASDFITVSWNYFHDHWKSSLVGNDATFRDLDFGHLHVTYHHNYWRHM
GTRGPAGRFGHQHVYNNLYEDFLYQAIHSRSDNQVLVEGNVFRGNTSEALSTYGLVIPMDSPNTCVCGDE
ELDGYANLGAKNDWGHAGVNITQKGNFYKADYKFKLTPLPLVPAVVKLGAGIGRIW
>FGMG_008293-RA | FPrate:0.154 | OMEGA:H-434
MKTTTALLALAVAAEGSPLFTKRDDDDVFSDKGKMCKGWNLRTAEGVEELWKKTEAGIDLELFINGHPEH
QNNWLKNLEDRVMGGTDGKSGASGCGLIGTSCNPMGGIGCEAQFEKYGTTFINKNSYWIFQSVKGMHGKF
AELHRQLTTETLINGLKIPKMIEDFGGDEKSPAQMKGWISAAASMGNALGGLIPGVGSGISAGLGLISGL
MSGLALEDEKDDGAATISAGLADIFKSASIKLEDTLRIATGGGRNEDEYNSLPAPKWDTYQTKIAKLFNG
GWFLLDDDVETVRVTLGSITNNIQKKVANDVMKASKLHLVADKLGGKDSREKCGYSTGRQWLPLRDGEEY
CWYIMKNDPDHTRQGQWHEVGADIYEKMASYGLGDRETYYKSLIDCALNKGDKDDVDTSNLVQGEIPRCF
FNLPAVFVEHDSSHGCGSPFDSHNCDYRKGTPLK
>FGMG_001923-RA | FPrate:0.182 | OMEGA:P-365
MFFKTAVVAALLPSVFATKGKGPDKDGKYWLSGDGIKAAFIPYGASITNLLIDDQYGISRDIVAGFDNAT
HYSIDKGHPHLGGVPGRYANRIRNSTFEIDGKDYHVKPNDNPTKESPDGADTLHGGPDGWDYRNFTVVSY
TDSSITFSIVDPDGKEGFPGEVVSYVTYTLEGMDWDIKIVALATTKKTPIMLTSHTYWNLDGFSNNETNT
VSNHSLHMPYGGQRMDVDNILIPTGDIIANKKGSVNDFWSKRKMIGDQENNEDLKNNCGFNCTGYDTCFT
VNRGQLGNYDWRTEGPVASLSSAWSGIQVDIYSDQDAFQFYSCTQQKGLPRTIPKYGCVVLEVQDYIDGI
NHPEWMRDQKQIFEPGGDPYVLQAKYTFSLKGGKE
>FGMG_002134-RA | FPrate:0.182 | OMEGA:D-461
MQMGAFNVLAILSGLAVALASDICAAPSLKVKTYNGVLEGFKDGSSNVAQFLGIPYGEHRRWEPAIPSGP
FGTLKATSFGPNCAQSEPGVGGPWAPEFLIKPNSTSENCLFLNIWAPSQALCPKAKPLPVIVWIHGGGFA
SGGGDIDYQIPNNWVERSQQHIVVGINYRLGVFGFPNAPSLNPKQQNLGFLDQRLAVKWVSDNISRFGGD
PKRIILWGQSAGAASVAFYQYAYPNTPIAAGYIENSGSAFLGLRANDETKSNFTSLAKSFGCRRDYVECL
RRVPFKDLQRHVEEAKTMSFVPVVDERTVFSDYTNRIPSVAKLPAIIGTNRDEGDLSDPSGSGDHSSDQV
KPDNTFHCPAHYETILRSSAGVNTWRYMYSPNFTNIMPGGEGAFHSAELPLIMGTHDEARGKSSKFEYEV
SHAMQDYWLAFAQDPSAGLTRKGWKPTPKTGVQEGIVFGSDNKVVVRPYSWTSVQNGCNKAGAAKN
>FGMG_004913-RA | FPrate:0.182 | OMEGA:D-267
MHIQSTLTLGLLANTATAVLTSCGTKGSSKALQDLSKDLQSGPLTVRDQGKNIEVKTFVHIVAASEKEED
GYLTDDTVNSEIELLNKSYKPWNFSFKLAKITRTINETWAYNYGDWPGGKDTEPEMRAALREGSYRDLNL
FFVTDMVPRGKCELPVPGATDDTVLADGCIMKPKTRGVGHWFGLEHTFHNGCEEPGDYVDDTPYEASPVQ
FGNCAEPGRNTCPDKPGLDPVDNYMTYVDYDCGPLRFTPGQALTNAQALEATCGLKDLATNGIFIRRREE
ITIMRGW
>FGMG_005620-RA | FPrate:0.182 | OMEGA:D-116
MLSKTFFMTLLALGASAAPIEGEVQKDNIGKRCDWNDLHGQISCGYFSVVMSFDDITIRGDGWTQKYNID
CSREWSSLRGQLPWTVEFHPGNACAGTNYDNMWIKYADTTLDIPSDTRCGAVGPNNSLRRCIIADKK
>FGMG_007785-RA | FPrate:0.182 | OMEGA:D-155
MRFSTVTACLTACLAPATALSVLNGKAPELTISDDLKIPGDSPLEFCPGDHAADLIKIDRVDLAPNPPKA
GQELLIKAKGSVKQKIEEGAYVLLTVKYGLIRLISTKADLCEQIGNVDLKCPVEKGEVEVVKTVDLPAEI
PPGKYTVLADVFTADDVQITCLTATVAFSRSSKGFFGSDL
>FGMG_011956-RA | FPrate:0.182 | OMEGA:C-32
MQFQLTTLLVLLAAGFHAVEANKCLYDTPRKCSEGCPNGGCTVPNSSDDVCYYDC
>FGMG_000005-RA | FPrate:0.216 | OMEGA:I-158
MHFFGLLLTLTATASAIDIRGWTSDGCRGSFRACTGIDPRLCCIFSETSSSGRYSVSVNAIPTSWRIGAE
ARTGGACRYIGTSASPASGRKDICMRYTNRGDRTGGYYYFPTLKRAADNSCPTEQPADGKCEASVKPNAL
GLEDGTMYDITGLTEEKIQELEEIAIAGATADAVPIEFKILSV
>FGMG_000931-RA | FPrate:0.216 | OMEGA:S-415
MKLSNVSLLAYICLSSALTQQCTGKAVNEGGNWFCGAIEEILYQGFSSKGSYQAVSKMGGDGSCQRESVS
YDGALGPLSEDLSVHIRGPFKLKEFAVYNLGSSKNKRDTESAPSPHLHGHRHLHEQRKKKRAEWVTATID
GKVVSWKNNWFGPSATKAPSAVAGAPTNKANEPVPKPKETEKKTSKKGDDSKTKPYGGSSRGNWERTSYY
NAQQRVADNVMFLGNYGGEGSGVFDNTWGNSLSYLNAKGTGGSSSPKVLKHIYIPSNKEFSIWSAEKCDE
SCGYARAKDVAYKGFSGSNKIFLFQFKMPFDGNTGFNGDMPALWALNGRIPRTGQYSECSCWKTGCGEVD
IYEVLASGDDKCKSTFHMNNGAGSSDYFKRPADKYIKVAVVFCERTSSVAIKQLPDTFNFGSSLSDETVQ
SWVKEMTSYKKGSSIFQIAA
>FGMG_003930-RA | FPrate:0.216 | OMEGA:S-180
MYFSSIIVPALLSSSALGLAVPHPEDSKLIKRFDVPGASMEDGFTIPEDTPDGIYRVHIGEDGVAHHTKV
DMNLESPHGDVSSSVLDKRQSWQINCEGSSLNRNDADLTVRLLRDGCGSGHTVQPRDHYYVISGRVASYF
CNNTSGRLTCSATIIRQQIQENVSRRCGTFKAGWSRVNYSNGHLSVGYQNVNNQNSFCGRNH
>FGMG_004775-RA | FPrate:0.216 | OMEGA:C-332
MKITSVFTAVFATLAVGSPLETRDAHIKRQAAEACSVGYCTQNGGTTGGAKGETITVTTLAALQEAAKRS
GPLTIIVNGKFTGSDTIRPASDKTIIGAAGSCYSTHRCWILRSSPEERYSRNLKIAKVDASNGDAIGIDE
STNVWVDHCDLSGDLSLGKDDLDGLLDISHGADWITVSNTYFHDHWKASLIGHSDNNASQDKGKLHITYA
NNYWKNVNSRQPLIRFATVHLVNNYWDKILLSGVNTRMGAQVLVQSSAFANSVERAIFFADSKETGYAVV
DDVDLGGSVNSAPKGTLTAASLPYKVTLLGSKKVASVIPGTAGRSCKQRSICDGSYMESCGLGCISTIPG
MM
>FGMG_005391-RA | FPrate:0.216 | OMEGA:N-372
LNTMKLSSGIAAVLLGASSVVVAAPTEQQSASSLVVDLNDKALSALKSSEAKLTERSGAKKCTTANAKVR
RDWKALSKKERKEYIDAVLCLREKPSKADPSFAPGARTRYDDFVAIYYAIFMMYLTNDSGNFFTWHRYFV
YAYEKALRDECGFKGTQPYWNWFETGNVSTNPLFDGSETSMGGDGKYFKHNGTKSSNPAGDIVLPSGEGG
GCIESGPFVGAVANLGPPAPGMSGMIPSKTPLGYNPRCLRRDLNQYPIDNWMTLPNLYNVTVGEASHSIK
DMQTEFQGRFGDGFLGVHAAGHFVMGGDSSDFYSSPNEPVFWLHHAMVDRIYWIWQALHPKQARDISGTL
TIENRPPSRDALKSDPLDVGVNAESITIDDAIDTLSSSPFCYIYE
>FGMG_007218-RA | FPrate:0.216 | OMEGA:E-378
MVSFKSILVLLALGTNALAGPEKPISSTCSTYLGSKTVKNVPTATTTAIKNITVTKKIIRRVNIVVVPQP
KTTTVRTTATDTITHTDYDEVATVTVTSDKSTQTNLRTSWSTKTSTSWTTTTKSFTSTVTTTPVGFTSIL
DDTSYHAKRDLLVERDPRGDVSPPVVNTLPGGDLPQSVRCVKDIPKYSSKTVTTNIQGPRRTLNAATKTK
TLTSFTSVTTTVYPEASFTVTTTEYHQVFTTDVEVTSTITVPETSKISLIAIYLERTYTNLTCRTVTVES
WIPQATVYDICGSRNMLRTANDGGSVGTYRDADGVSYADLGKGFNEVSCCNACAADPYCRGTNYDPRNTA
CYAYISRNKSQCSTSRNLLARYVTWVFEGGGVFSNGPCGFWENGGRFTL
>FGMG_008275-RA | FPrate:0.216 | OMEGA:I-201
MQHLRYVLALFAAAGSAVAECPINPSGNIVLKYKETEPGEAVKKDIELRILPVGDSITVGYLSERKGGDG
NGYRGQLKKDLSGDKVVFAGTESSGTMIDGNYAAWSGKTIQLGKLIDKMVKACPDATILVAIIINTCDEK
QSPATKEFQNLVPGVVRSRLDDGKHVLAVDFTTFKTSNLQDCIHPTNDGYKLMGDYWYSFIHQIPNSWIK
KPVGPDPNGGDSTNG
>FGMG_009827-RA | FPrate:0.216 | OMEGA:V-273
MRFAAFLSLGLGANIAIASVCKPRSRTLTESGSVSTEPASATSTEPVAIFTTSTDIVTTTTASVELSISA
TSTDDDVTSTEATESGSASIELSASTATETTATEIPTTTAETTTSAEATTTLMTTTTEDTFVPIPTFNLK
ALGSDVDGQLLRGDPVRYNNLEWYTPSPPVLTFSIEASTNYVREINTGKYLCVSFGGDGFPNSNMLCDPD
NHYAGMEPLTCEQTRDRKLKCSAPAGECHLDEATDTTYCNAVPGTWDQFDVIHGRIINTPALVMVSSINP
PTADDLEAIELQVVPYAD
>FGMG_000136-RA | FPrate:0.252 | OMEGA:S-192
MIGIHCFLLLPAAVGVAFAGPCKPASSIITDAEETSTFTTAPETSAAESSTIFLSTSTTEDTTASTTLLT
ETTATIAADETNTEISSNTISTDAAESSLSTDITSLATTAETTTSESATTTTTAPAPDIACPSTRAQCFG
SMNIKCGVFLVGITQNSLVDNLDECVRSCAADAGCYGFSYMASQKLCFTAPSANTILGQRQSSPWDSGVK
GTC
>FGMG_001694-RA | FPrate:0.252 | OMEGA:A-355
MPSLFKTLFAVAALLPSAFAALPTKAEGFASSTTGGGSAAAVYPKNAQELVSYLGDSQPRRIMLDRTISF
LGTEGTASETGCAPWGTGSQCQLAINQNGWCNNYQPNAPKVNVKYDKAGILGIKVGSNKSLIGVGNKGVI
RGKGIRIVGAKNVIIQNVHITELNPQLVWGGDAITLDDTDNVWIDHVTTSLIGRQHIVLGNKACNRVTIS
NSKIDGTTSWSASCNTYHYWGLYFAGSNDLVTLKNNYIYRVSGRGPKVAGNTLLHAVNNFFHDVPDHAFE
IDSGSALVEGNVFQNVKYPVNSQGIQGQLFGVPNGGSACAAALGRNCQVNGFGSSGTLGGTSTGFLNNFK
GKTIASASDYNSAKSVMTSAGFGMA
>FGMG_002383-RA | FPrate:0.252 | OMEGA:K-468
MAFIRSLSILALALGATAVPYNTFDGPGFPACQDVAKVHDASSVKDIQNTVRDAIKAGQRVRASGKAHMW
YDTMCSDDPNTVIVRTEQVNNIYDLDMEAGTVMIEAGVTFRGYTLVNWNITLAGCVAMGAHRSSIREDSM
VAAGVLAMDIIDGTGKLRHLERDDSEEWLAASTSLGLLGVIVRMKFKVYPDFKVYADQKTLDEGDVLDGD
IYGMIAPYATANLWWWPHKKKFHWRYYDVIPTNQSEQEGFQNTFSITQVEAGAISALWNTGKGVSLSNLL
AEEILFGQWEKPNFREKTTNKPIEKWPVYGWNYDVLIGGLYPDQRPVWEYGIHGYTLELAFPVTQANAML
KRVRQLFDNEAKKLKFMASTYRSGINIKFGRPYFDLLGQVTYGTSDGADWDKGVIMLDFPSYKPSIGDGL
RYNEPFYHKLAETLIDEFPCRPHWTKNTREVFERAAKNIDPDHISRFKAVREKFDPDGIFRSVVGEAIGVY
>FGMG_003957-RA | FPrate:0.252 | OMEGA:D-342
MKAIIPLSLATLAAALPGNIQPRQAKAPVFNIDGKSQYFAGTNTWWMSYLTSDADVEQAMSQIAKSGLKV
TRVWAFGNTNTGTDQPVYFQFLDTAKKTITINKGTNGIARLDAAVAAAEKHNIQLVLPMLNNWDDLGGIN
IYCAYFGCTHETFWTHADAQEAYKDYVSFIVNRYKDSPAIFSWQLCNEPRCQNCDTSVITKWATEISSFI
KSLDSKHRVSLGDEGWLCSDDSSLGYAYSCSEGIDFEANLKISTLDYGTVHMYPIGWGYNYPWGNQWIRD
HAALASKYGKPIVMEEYGVESTTSNRTAVLKEYQETILSTEIAYDSFWQFASNLPSGANPYDAYAIFYGT
QEYQDVVIDHAKTISAKAV
>FGMG_005095-RA | FPrate:0.252 | OMEGA:S-196
MGRHLVRSFVLASALSSLARAGPCRPSTTSVVAVTTTTATANSEAVDTTKSPSTTFSVPLTTETSEAEST
DTTDTTVAVETSREISTVTDSLTQAVSTTVTSDAAFTTTTEDAATTTAEASTTTAAPAPTCVNNLKNPTP
EGASCGLTGFPRNSVSYVANGPVGSAFECYESCLAEANCQSFAVQENVFCELYSESVGGTGGEFTTYKWY
DRVCFCEIEET
>FGMG_009737-RA | FPrate:0.252 | OMEGA:S-350
MVALKSTLLVILALGNEAFAATTGVICATKLGTVSVASNKIPRATVTVKNQITVIKKVIRKVNVIVVPQP
RTTTETQLSKTTVTTDADSDVETAISTITDTQITTITQFTTTTSTTVTSTTVTSYSTSTIKAPDNFKFLL
NSGGYVPKLKGRGAKPILPRGTSSQYPQRVDCTKSVPSTTIKTVSTTAKGVRVTLQPKTKTKVVVKTETV
TSTNYPPKVTKTNTITVSPTVTVHDTVTRQAIATDTVTVQTILPADPYYEACGSDAFLKTANGDNSVNLA
IPFSTPYTQQYYFSADTMSSYLCCVQCMKSPKCFMSQTYSGSITCYNYLSTTIDNACPNGQIQWASYYGS
TGPAFYTYANGPCGFMNNIGLQG
>FGMG_009843-RA | FPrate:0.252 | OMEGA:P-51
MKFSMAAALSLITLAAASPVQERTNYISYEGLKRDGTPCSLVNVSWQNCRPAAYANTWTRGCSPITRCRD
GYPPGP
>FGMG_000043-RA | FPrate:0.288 | OMEGA:D-242
MQFTSILLLASTALAAPWAPQSSAHQARAESIDDMLPPIVPINTRSGDRDLISKIITAPTQVERLKLLNQ
PGDFVFDFRAVTGAGEAIGKGGRSVSATSLTMPALIGNGASMTVAFLGPCGMNTAHVHNRATELNIVVKG
RLVTNFVVENGGKPIANTMDTFQMSVFPQGAIHQEFNPDCEDAVFVAAFDNVDPGVNQIAQNFFSLRGDV
LEATLGGVQTIDGKDIESFREHIPANIALGIDACLNKCGIKRNSKRDLKDILN
>FGMG_000049-RA | FPrate:0.288 | OMEGA:N-124
MFSWIHLSVIGLTLVSPAIAADECQPSTWQARLMETGGINCRFSTKTGSKVSSDTCATIAKKYEITLDTF
YELNPRLKSDCKNVLPDIRYCVEGFPEPIRAYNGLCGPPHSNATCVGTDKQCCNKDTWTCGDTKDDCHLN
CYEGNCY
>FGMG_000076-RA | FPrate:0.288 | OMEGA:Q-138
MQIANLLAILSAVAATVASPVSDPSKHNVAEDGFDFEHASENTANLMKRQNRYCYQSGVKFGDNTDWAID
RAGRWCSGNGGSGKFRQGQIKKGCYNYWQSDKNYHFLFEMQNTQPKDYTLSSKECQIWLQHMIENCRQGG
TNHNSRFRWRVDPEDGRCS
>FGMG_001157-RA | FPrate:0.288 | OMEGA:A-224
TILYILLVLAIFQEPMLCCTLQHDNGLYITKRFIRPPRSTVNSDNDFIYDQDDEDPDFDPSMPNCGTDTE
DPIAGAYNIEGHHAKYETKCPKALTDQIWRNKLREMSAEELGSPKRKTCTCRWRVVGECLLRPASDMLSN
REKKKPIATDLDKFDYSVHRCLGTKDTALIVAKIDAKQLNLYQLTNKVDGLCDIQQLGRNSKSGLRNSMV
WYKEFVNTPRIEKASDQYESIRSKVRAYITTFIK
>FGMG_001235-RA | FPrate:0.288 | OMEGA:S-389
MAPSRAKSLSFIVALVLGIVLCVFAAPTLASSPSEPSPSADVELICHTDNPKDCYTKIFQPTDEFQIVHD
DQELPHGLHVRLNMSNGKKEAKINVPDEGNPALEGLPVDQAIVVVDQQQQEDPQIPKGAPAYEPIGKIKE
PEDEEFVGKPFFTAMKMLKAGETGEGSELDDALEGMEELSHDIYYGLKVTEDPEVLKALFCMMGDSTATT
PAGVTPRDHQAAAVLGASLQNNAAALKEVTKQWSGLMEAKCPVNGKSLKESLYSSLVPSHVPSSIDTRTL
ASTAKAKVGAINGLMKSDIIRADFLKHDGMKLLLEVLVPEGNEWGTTQRKVGQLVLDTFLDEDMGAKLGQ
WPRTERTSDAKCRVFETSTEEGCWDYHVARILKENKRDSSHWSRDLHDRLAALRKSGKVPPRPEL
>FGMG_001857-RA | FPrate:0.288 | OMEGA:I-137
MQFYTLFLAIAMLQGAIATPQPEAAAGVETRDLETRDIEPRAPTMGDIPWPRMPALRRAEAKKTAKGSDC
PSTGGGNSQGNACSSGTQFCCTTDGAGVQTCSNSEVCNAKIICCNNNSGFQMCIGEIDFNAPVTININIY
KGGKGGKGGKGGKGYKA
>FGMG_002842-RA | FPrate:0.288 | OMEGA:S-93
MKFTLIAALLAPVLAVNIPRELQERTGQCGDNCARAVVPGFRGLAVVASYKAECEAYLKVTTTPEASTVY
VTKSVPTYASACSGETRYLTACSCAGASAVTVEAPTPTVTKTVYV
>FGMG_005145-RA | FPrate:0.288 | OMEGA:Y-261
MRFFQLAGILALASPVLGKLGKPVLCPGVDFAHIDDDLFEALPQTPHTVTKWPWGKLPKQCKKLAAQSNL
DPYNMTVYDVLYEDCPQPWVICHHHLSQNRIESIADNFGRVPIGLRNFIRIQFAAPPLNGTLMGACTTFP
RGDVAIYGNTTKRLQDWVHEAIHGADYYLGHKLYGKMFTDTALFTNEFNKDEFVSDDYAKLSLREAFAQM
GVLTTIEKFLPGRMASFQPNCDIVCMGPEAGCESPPSAKLRRRDNDLKAKYEIKVPDGRSFDSCEGQYDQ
VY
>FGMG_005187-RA | FPrate:0.288 | OMEGA:E-281
MKFFSTLSTLAVALMMTGEAVAGTYKGFSMGANRADGVCKWEADWKKDFQAIKSWNKGFNAVRLYSASDC
NTLVKAVPAAKATGMKILVGIWSTDDAHFGRDKAALLKAIKQHGTGWIAAISVGSEDLYRKDISPQKLAQ
QIYDVRGMVHQYNKALKVGHTDTWTAWVDGTNDVVTKACDIAITNGFPYWQGVPIKDALRLKTFQNSYWN
VKKHVQAVNSKATVWVGETGWPTKGPNYQKAAATTASLQQYYNNVGCWLWQQKDASGFWFTAFDTPAQTT
EVEKYFGVANQDRKLKFSLTC
>FGMG_005325-RA | FPrate:0.288 | OMEGA:F-420
MPRQNNPLSKALVSLLPLAAKASAASLNSEYTFNPLHHLTGIAPYFESQDPPASPDAPQGCTAERAAYLV
RHAAIYANDFDYEEYIEPFVEKLENKTGMDWSKIPYLNFLADWEAPISDAELGVDLEFRYPEFKQPKKVW
TSTAERTVKSAQSFVRGLQADDTSIKVEQIYESEESGADSLTPYKACPAYSGSTGSDESSKYQEKYAKPI
VERFNALASDFNFTINDIFGMQQLCGYETVVRGKSPFCNLELFTPDDWLGWEYAEDVRYHYNAGYGNEVS
GYVGMPWLNSTANLLMNKDSDEDLYVSFTHRELPPMVLVAMGLFNNSEPGGSESQINDTMPLTKINYRRA
WKSSHILPFLSNIAIERLNCTGSYGYEDGEYYRVLVNSAPQPLPACEDGPGTSCTRDSFEEYVQARVDKF
TGFTDKCGVDYDNSTDILSIYHE
>FGMG_008911-RA | FPrate:0.288 | OMEGA:F-338
MPIMSSLSSPWRQIIVCLLSLSLVDVAAALPSSPSIRPYLLPPPKQLIGKRSESSPSIRPYLLPPPKQLI
SKRSDNETNFMPRLDVNFPDPCLLQDQDGRWLSFATSGNGHHIQIAMADDPFGEWTHLEQDALPGDGWTS
GRNFWAPDVRKLADNSYVMYFAGENPEGGHCIGVARSQNSTGPYEIDPEPFACPKDEGGAIDPAGFYDKT
TNKRYVVYKVDGNALKGGAGTPIRLQEVSTEDGSTKIGEPVDIMNRIPAEDGPLVEAPNLVHTNDGKYLL
FFSSHMYSDDAYDVKYAVAEQVEGPYVRGPAPFLKTPALGLKGPGGGTSAEDGGFLVFHAWCQERRRCMY
AIGYDIARVDNSA
>FGMG_009839-RA | FPrate:0.288 | OMEGA:Q-367
MLTLGALIFFAIAAAIALVAKKTLSKPQKESLISRAIPAAAPLTQPLPSTWYKSDDIYELERRAIFSKKW
ILLTHKMRFEQTGSWVRYAEAGFDFFLIRNAEGTIKGFHNICRHRAFPVVVKDNGQNNVLSCKYHGWSYG
MNGQLAKAPLYQDLPAFDRSKNGLFPLHTHVDEKGFVWINMDAKTQPETAWNESNRTARYSSFNLDDYTF
DHVKQDTSSFNWKTLADKSNANSNAATELQEKGTSLVSDFYFPNASMTISPHFFFLLRCVPTSATKSQLQ
YEIYRHKNASSDDFAKVEEILQQTASEHEAPAEKNLRAGVLVDQTPLQFQNQVYQLVEHHRKLEGIAGRE
IRPAQQILDKSATKTEQDTSLYSSCSGLSCDKIQKDLSW
>FGMG_010916-RA | FPrate:0.288 | OMEGA:I-386
MRVTLFVLSSISAITTIVASTLPIPESEEVPPIINPIVEPIVGSILESNIAPVIESVVEPAVDPIIEPVV
EPIIEPDIEQTVDPIIESAIDPIVEPVIEPFDEPAVDTIIELLVDPVIDPIVEPIIESVVEPVIEPVIDP
IFEPAADLIVEPSIELAAKPVIDPINETDIEPAIKPVVASLVDPLVEPIIEPNVETIVEPVIDLIVDQIP
IPEPPSRSSTGVIPEDLKNAMQGIRRLASDVMLQANKIAGDGVKVQIIGNTYLRCQNMVDEIQEISRTIS
RPPTMLFSWEDQGGICSAFDSVRHDPCDIRVSHKPLRNDKLTFRKFGINLSKLITVLSLEPKSVVRDGFG
DRFKDCFDELRPVLGLFIKQLIIYTPTCEGEMLRRIDQLDVALSNAKMRMEDARQS
>FGMG_011531-RA | FPrate:0.288 | OMEGA:G-112
MALPTSAGGKGPVLMLLLALAYCYDTYGYCRCCHEQSEGACSSKEEEKLESAEWVFPAKVGLASTKIVVG
MERYCANKSGGRPCGVSPCYHHSFLVLLAPTTTLGWLPGCTGDRPYVDCVEVIMVHRDHNAT
>FGMG_011900-RA | FPrate:0.288 | OMEGA:E-470
MHFNTLTCVLVSLVAHTSAVPTKREAVNSCLTQAKVPTDAQGSQSWKEDGTAYNLRLPFEPAAIAVPTTV
AQVSAAVECGAKHGVAISAKSGGHSYTSLGFGGEDGHLMIELDRMYSVKLAKDGTAKIQPGARLGHVATE
LWNQGKRALAHGTCPGVGLGGHALHGGYGMVARKHGLTLDLMIGATVVLPTGKVVHCSKTENSDLFWGIR
GAGANFGVVVELEFQTFAAPEKITYFDIGLNWDQNTAPQGLYDFQEFGKGMPAEITMQMGVSKNGYSVDG
AYIGDEASLRKALQPLVQKFGGVQVTATTVDWMGLVTHFAGAGVNVNPTSASYDAHDNFYASSLAAPALT
LAEFKSFVDFVSTTGKSSSHSWWLQMDITGGTYSAVSKPKPSDTAYVHRDTLLLFQFYDSVAATAQYPSD
GFNLIKGLRQSISNSLKAGTWGMYANYPDSQIKNDRATEMYWGSNVAKLEAVKAKYDPKNLFRNPQSIKP
KA
>FGMG_012073-RA | FPrate:0.288 | OMEGA:Y-379
MARHLVHSLVLTAVLSPLVNAGPCRPSSSSTLAATIATTTKESTSVESLSTLLTSTITESDTTVSATSLE
ATTTTTSCSTQPFPWELSSSVTTTTSEETIATTATTEAAATTTAVAEQFECENNLKVPAPANAACGVSGY
RPSIPQGAKAIGSGSAESLSACYQSCMEKANCVTFAFQENSFCDLWKGAVGETDGAETGFKWYETRCFCD
TGIEPAPTCEDTKIIKNAGWDTGKFSPWKYYPVAEDREIVDFSIKAGGADGTGYRFQTGNFHYDKSMWLY
QDLTACPGVTLQCSFKWMWDKYYGIAQNDGSTLVPYVRIYQDDDTYAIVSPYPESDADTKRWIESDSFYF
TIPSSGKTRIWYVASSPQGEWINTSTEPYKSNWVHRTNKLALDSLICYPL
>FGMG_002305-RA | FPrate:0.323 | OMEGA:Q-313
MSSFITKTVLAALVAAAGVRAHGHVESITVGGTEYEGLNPGAAAFENPRKELAAWFATNTDNGFVEPSAF
GDADIICHRGAENAVKSAKVKAGEKITIKWDTWPESHKGPVIDYLASCGSDGCAKVDKTSLKFFKIAEAG
MTSGGKFASDDLIAAGNTWEVTVPTSIKAGNYVLRHEIIALHAAGQENGAQNYPQCFNLEVESDGTAEPA
GVAGTSLYTASEKGIVFDLYNNPTSYPIPGPKMNIAGGSSGAAPSTPATPTTGSGSDTPSNTAAPVESAP
AESAAPVESAPAAGNGNNGGASPVETEAPATPQPTKTGCKAKKARRHARDMMN
>FGMG_004133-RA | FPrate:0.323 | OMEGA:Y-402
MKAALLNVITALTLIGYSNATPATSLDKRYLLEDNGIKYKVFEHAATKSQTKIVSNSGICETTPGVNQHS
GYFSVGDNMNMWFWFFESRKNAKTAPLALWLNGGPGCSSMIGLFQENGPCTFNKGGSKPTLNPYSWNTFA
NMLYVDQPIGTGFSYGTDDAVSTLAAAPRVWNLLQAFYAQFPEYENRDFGLFTESYGGHYGPEFAYYFEQ
QNAAIDAGTIKGEKINLVALGINNGWIDPANQYRDYIEYAANNTFKKLITSTQYSKYLNTYNQKCVPAFA
KCPGLTGNDAACGNADDVCSQAIERPLENTADFDVYDIRAPSNDPFPPSTYSTYLQSSSVMKAIGAQSTY
GECPEAAYDKFINSGDRGRSFLSTLSKVIDSKIQVLIWAGDADWICNWMGNYRALNSIAPQSFVSAPSPV
LYCRWN
>FGMG_004417-RA | FPrate:0.323 | OMEGA:M-219
MRYITVPILLNLLLSSPSLTAPNEPCYGPSGIAGVCITDAACSSAGGTSISGACPADAANIKCCSKPKCS
SGNCRWTSDCDGTSAAGQCPGPSQMKCCSSAATGFGGYSAPTIPAVGACKAVSVNAVKKVVAAFPGRIRE
IGCKRDCSCPGSSDHCCGLATDFMCSDGGGSATLSGKEIAEWCMKNRSALNLKYVIWGQKIWTTSVDKTE
KKWENWRTMEKRDGLTQNHWDHVHVSYNG
>FGMG_004534-RA | FPrate:0.323 | OMEGA:M-198
MPQRGTVVLACWCLSTFTVGKLDTTPCQATPHLKTLQYQDCHFSRCTPRCINTVSDNNYADAFVFEPIDV
QHHTTKRLGQSSRGPWKILRQRKALILHVNVARPVQAPRQPQSQPATVYGPHHDTLDVAQAEWKHSRMLH
VLTWLCVPLSLRDNLDYSRGVPTDAQPMPIPALVIDLNVSASQVAGNQTWNICAGLQMTAGMNQHETDFL
NGYSYYQQA
>FGMG_004616-RA | FPrate:0.323 | OMEGA:C-455
MHRTIFVLCVPLACFLLVSTSLYLGRDHITRLSETYLPLYAPGLATTSTEISSSPSSSTSILAYTVYAEK
PTSYTNIDSPTSTASSSTASATPTKSAIPIANGSVLSTERLTPYIHAILDPLSKERLRLQCPPLDTKRYK
SLQSNKNTRTNDDNEQPIDFYFALNLRNVVNLLPRLMGSIVETIKYLGPERCALSIVEGNSPDGTADVLV
ALHPFLEELGIKYFYNNSAINPSKGPRIRKLAQLRNLALEPLFKKKVPASDETTVLFINDVAACPDDLLE
LVHQKRNLNADMTCAMDFTYAGPDPTFYDVWVARTLAGDTFFPIPKDGSWDNAWDLFRGNREARMAYDAH
LPFQVFACWNGATAFTAAPILHGLRFRDPMKDECFQGEPQLFCKDLWHKGYRKIAVVPSVSLEYTDARGH
DIKKLKGFTNEVVQHMDESKAHIDWQYDPPEKVKCMPSFDRQSWLPWDESLKGRR
>FGMG_005185-RA | FPrate:0.323 | OMEGA:L-312
MLPQTLLTLALAATSFASPLARANSVCKDPVVRKEWRELTSAEKAEYLRAAVCVRNLPKERYSHINAVTS
RMDDLVYTHFSLNTEIHFVANFLPWHRWFVQLHEDLLKTECDYKGVQPYWDWTIDADKKDMKNSPLFDAK
TGFGGDGQRTDSDVPGFQRCVVDGPFANTNLTLAMGWPDMNTPGDRLHCFTREFNGGLGRDENGDQILGD
MQIDAYNSKVMNTIYGFDNYADMSGMLEGLPHAQIHSIIFGDMGPATSPNEPLFFLHHANVDRVWAKWQG
RNDTRLSDYTGFRVSQTTIPATITDTMPVMELAESEPVVKDYMDTLTGPLCYTYSDM
>FGMG_006238-RA | FPrate:0.323 | OMEGA:S-177
QAFILGTFPPLIFVLYIDFPSHALDPLHYLCRPREAFINFDFHLFVYSVAITSASRSSASAHQVSATSIN
ITMGGFYMQYLESLCRRRGWTDPMYECYRDHNGYTCLVLVNGREYQTDLAYESDVLAQENAAMRAFMVCR
NFSVNGGMLARNGIVQGLPAQETARRRKSRHTSSRDSDRHSRRSGHHSSSSSTASFD
>FGMG_007057-RA | FPrate:0.323 | OMEGA:S-424
MSRLLTFVASLALAAAQLSSSSLESHVNTLNLGSSFNPVKEAYWTGLLTIVELLLLSPPMGVDPKTFTAV
GTPITIKDGKEAGGLVAHNDGFALLTNEVVSGESKDPLPVIYKYTNGKQAFRTLLGGSGLSGDALASPDI
NGDLVFSEKAGYYAAYIVVTSYSGWAAGHFGDAIRYITPQGKVEEIQGASSSWGCSHNTGIAFEAADEPP
FASLCAEDQGAIWLNTETQGMSNNGVKVSNEHVINGASNEPMGGMSGSYSSLARFIGSDSYIFSWASRGA
INLSANDWMGDGYTHSEQRTTNRNVAIALLSDKKTLVGEQATSKVGAKDGDSQVNWITNGTNDCSNVHVA
AFNNSTALVTWEEISNPVCDNEAMGCSGKFAGTKFQVVNSSGNKIGKAITSDDTFIAGDMVTMSDGRICW
PYVSMTWNLNGPVQAADVKEMSFACISNK
>FGMG_007773-RA | FPrate:0.323 | OMEGA:S-149
MKSSLALAVLSFFASQGLSASVDMWSSPLSERGAPNYKPIEPKLIKSRLGSTPQENSDGDRKPGSVYFCR
GENWGPPCFEYQPELEYTCTELNGKLQNHIGSVFSEPEIICRLATFENRCVPLNIFGWPEIEKGSAHLLH
QKSPTGPDSLGHSVTHFTCAKCTNCVRDPK
>FGMG_008307-RA | FPrate:0.323 | OMEGA:N-80
MKFSIASTLLLANGIAAMPWSSLNAKQSNGEEITLHIQVSQPPSNHASSPMHRGVVNVHNYEVCLKVCWP
EEPTCPEGWNSKKFGDGDYPCWTCCKKTGDDDL
>FGMG_008942-RA | FPrate:0.323 | OMEGA:K-360
MVLIKSFVLGALAATVAAKSAVIELLPSNFDDIVLKSGKPTLVEFFAPWCGHCKKLAPVWEDLANTYESA
KGKVQIAKVDADAHRELGKRFGIQGFPTLKFFDGKSAKPEEYKSGRDLESLTTFIAEKTGVKSKKKLEMP
SEVTYLNDATFSKTVGSDKHILVAFTAPWCGHCKTLAPTWEDLAATFANDKNVVIAKVDAEAPNSKATAE
QQGVKSYPTIKWFPAGSKEAVAYESGRTEQAFVDWINEKAGTHRVVGGGLDNVAGTVESLDTLVAKITGG
AAITEIAAEVKKEVEGLTDAAQKTYAEYYVRVFDKLSSNNDWVSKELGRLDGILAKGGLAPSKRDQIQQK
TNVLRKFVLKKADEKVEQVKEKVEEVKDEL
>FGMG_010894-RA | FPrate:0.323 | OMEGA:D-248
MFSKALTALALVAPLVSAQTFTSCNPLTTTCPPDPAFGKDTVHCDFTKGACPDFKEDAGTSITHNANGAV
FTIGGPNQAPTIATGKYIMFGRVDIEVQASTGVGIVTSAVLQSDCLDEIDWEWLGGDNAQVQSNYFSKGD
VSTYDRGAFHPVANPVGQFHVYSIEWTPALINWIIDDVVVRTLTYEDAKGGSAFPQTPMQIKLGTWCAGS
PDAAEGTIQWAGGLTDFSQAPFKAYYKSISIVDYAGGDAPTTKSVREYIYGDHSGSHGSIRTA
>FGMG_011634-RA | FPrate:0.323 | OMEGA:D-262
MCSERFFVVAVAISVIVPVTNAFASVGLAIFTKLSREIRQQIYHELFGFLRIHVRYHNRNDQSSHKISWS
YVFYQERRPEPDSFFGNENIYAHVPKSLESGLLYTCQQAYSEGRVVLYGSATFFSHSPIDCIHFTKDVPR
RSWPQNLDFDCTFRPELEPSVPLIDLLYWVVDDFRAAKIKIWLADTYYRTDRVGDKAQQKTVEALKHFLS
YSKSDTTFILPSCFEPSVKNLKMEAPAKSHSSFWKIIPATRVFELARMVHLDKGHKHDDQGGYEGYGNYD
EISY
>FGMG_012248-RA | FPrate:0.323 | OMEGA:G-133
MQFNASLLTLLMATLAAAQPVSQNPSALSFEKRGQEDQCGDSTFENKSSGGSPKVSDCQQIARNIAGGGK
WTVGAGGEHHQLVQYGTCAFGAQGAGSNMNAAFIGNTDIIDLINDSIRRFEWNGLVGASGVMGCRSMTGL
VGGVNMRWGIYHN
>FGMG_002376-RA | FPrate:0.360 | OMEGA:D-421
MRAHLIALTGLIFSPLPTTADQNIKVDGVANPDFASIPNLSGFLNQAVVPLEEASETPSTPRHVEANKKL
TKAMAKGWGNWNAHHPRHRLLDALYGYSRYYERQKAELGRLEGLYKHVSKAQKSLLEHSVQYSKKFTRID
NLLKKNQELCNRIVQYAMHFYGIDHDELNKHIQSLEVSGKLADKISVSQALKHYVRDWTETGDAERKGTF
SCLTKTLESLFPERKGEKPVKVLIPGAGLGRLGHDIARLEGFDVTINEWSMYMNVAYRFLEANRSQNSHS
LHPFIDGWSHHATESNMVRPLSFPDVTLNSTSVVLIEGDFTTVFSTPGEYDVVVTYFFIDTARNLMGYLD
TIKKVLKPGGHWINLGPLLYGTGPFVQLSLEEILVVCEALGFEFLETDESCGEKTFEERTVRAMEAAYGF
DDRALTKSAYNAQFWVARRSMKP
>FGMG_004879-RA | FPrate:0.360 | OMEGA:D-100
MQLATALLAVLCSQAHAAISFGQQEKLYDRENHHIAWWEGQSACSQNSAVELGYASVNLCSMKFKLPGDN
TEYHAAYCGTNDLAIYRADGSLYGKCSGRDYGKKIDCGAVDHDVVKHYVCG
>FGMG_005101-RA | FPrate:0.360 | OMEGA:D-252
MKGLITQLALAVCCSQTFASPVRSTSAKNLVVLRTAPSASNPIGNPGLPGQTTSAGLNWVGHVTSTLNTS
LILTYDFAYSGATIDKKIVNSWAQYSMSDQVGLYKQYVAPAVSDADTLVAIWIGINDVGEAFWSKTNALV
TECVNRYFELLQTLVDDGFDKFVLLNIPAYADQFPKMIGQPAVDLARLRADIISYNKAVQSKAAAFTSSH
PTVKLQIFDTKPSFDQVVNNYAKYGAKDATCFGASNCLWADDYHASGAIHKLLAQNLVKAVRGIFTF
>FGMG_005660-RA | FPrate:0.360 | OMEGA:M-462
MKLPSSCLLALVAGSSALNIPSHHDAPLTIKTTSGELTGFINETAPSVRQFLGVPFAEPPVKSLRFQPPR
RLHGKGSISAKKYAPSCKQALSNAPTVYNQYMTQFLINGGQSEDCLYLNVYAPLNPTSKRLPVMIYIPGG
GFTGGGADSLYKIPDKWIQKTQAQIVVTMNYRVNVFGFPNAKDAHQNVGLLDQRMVVEWVRDNVAGFGGD
PNQMVLWGQSAGAGSVGMYGYAYPKDLIVKGLISDSGAPSMLVKQYGNYTDFDTIATKLGCKTGNKQLEC
MQKVDASELQKVYSETAGVSFTPVGDNTTAFSNTTDRLARGLVTKVPWIFGNNANEGAGFGTYNKSGVSA
SQLAIGRAAIVCPVAAEVENREKYGYPTYRYYYTGNFSNISPLPWIGATHSAELPLIFGTHYEYRGNSTE
YEWQVADGMQSLWLSFAKNPTKNGIKGDGVTWPPYKPDQKKMAVLAEAGKKWFQLGPESLTDDQCSKA
>FGMG_005840-RA | FPrate:0.360 | OMEGA:C-83
MKPIAVLATMAAVFSTATEARACTQGLKYCSFNLLKIGKYSGDYYNEIEAELKRNGLPNSYSYVRNSLFR
CASDGWIVFESYCGVCIDGGSGKGDRCPTGIGK
>FGMG_008659-RA | FPrate:0.360 | OMEGA:P-446
MRLSLPFVALCAIPAAVGIAIPDSAKEVGKSDYKHHGEHYHGVHKYHHGEHKHKHKHLHPHEHIHHVHHK
HPIKPCHILTKERVCRDFHKLTDEVEKVIHVVQTKDCDNDESCWSGVVYHIYKLEHHLDTYDKEIDYTTL
KKCFSCGQESYVVDCYLGYADALIRLLKVLKHKTKHLEGEVDRPVLTSINSLRSANYALTYEIGRRISCK
KDLKIIMEKQGADDGSTKGSVQQAFSKFIYTPLITGDDFENKGSYGDPREKGYEGKSYNKEVKVFKHHHE
HHHGHHHGHKHGHGHLHAHEHGHKHGHIYHKYHHDEYKHKNEEYKHDDGYKHDNKHKGDEYKHDEYKHDD
GYKHDEYKHDKPHYHRLSVRNYRDPQFVDKDNYSLEPSNDQYVRNPYGAYRNMEREKEWRDREDEEEERA
KDLEWFRRENMRVYAEAWPRGPAPFPPKWHSPNRSPYNHYNGNRRWE
>FGMG_009870-RA | FPrate:0.360 | OMEGA:P-237
MLFKPSFLFFSLFSLGTVAWDAPNYSGFTKVWQDTFAGSGGTLPDTSRWNIITGYLNVNAELEVYTSSTR
NVQRSGGDTLQLVPWRDASAQNGWTSGRIESKYVFTPKQARSPEPKPTYASVPAPPTTSKIDAMETVNGQ
LTGHGTVHCHVYPGGICNEGTGIGNTIGIPDQSWHTWRVEFNRAKSSWRDETITWFMDGQQFHQISGARI
NDQNVWNSLCHSPLYFILNVAVGGTWPGYPNGNTCDGYGSMMEVGYVAHYTN
>FGMG_010467-RA | FPrate:0.360 | OMEGA:E-169
MRFVNLITVFVGLAAAAPAPAVAPVATPTKDDMIAVTTVAPTASGDPVTYWSASPESVKVCDEDTYVGRE
GPKEMKRANYRDCAALLSSFGSRNGTFFVPRACEDDSEYGLKDSHVDIVKSGSCAFSVRADAGLMVGDED
IVWIMRKAVLNNSDGMEMAARGSVKCKPEDGRVMGGLYWEIHGIESTGY
>FGMG_010988-RA | FPrate:0.360 | OMEGA:S-425
MLLWLAGLGLVTASITIPLSPVAPLPLSHQGAATSADDLFRKSCPEEVASSNPYTASLLASSFSDDVFST
GRVFPSSGGFIRGAVEAWAQHQHLVLRPEEVWFEVLVQMNLYMSAHSEKVRGLFVEHEGGKEKIVVEGNT
WDDMAVGFGDEIDKRVKTTWLKDWILPGFSTSTPQDDVTAAVLMMGLMKQFFDFEGWLVCGIPSVTLLGT
REDWIKLEAKLDYLKEFGPDPELFAEILRPIMKRFVSSWDDAHAEETKLFWEQIVRVKKQWSCGEGASEW
DVSGWITGFDFFDRNGWRRGYDAWADYDEDEEEEDGEAKETAKEEPQMGIFATDWSIVMDGQKYISLSLS
DISTGYAKAPVKMKDYPHPGVDTEVYILAGNVGVERIEEGDKVTAQPVSGWFAYGPVNSNHTVGPFIGSG
IEMESIAVGIESCKAVKGEEEVKDL
>FGMG_000694-RA | FPrate:0.394 | OMEGA:M-415
MHFNSFALCLGLAGLAQAHMEMISPAPFKSKDNPHAGSDVDYSMTAPLEASGGNFPCKGYHSLFGTAQGA
SVADWDAGSQQTMKITGGANHGGGSCQASLSFDKGKSWQVIHSYIGNCPAAGTSSFDFKVPSDAPSGEAI
FAWSWFNQIGNREMYMNCAAVTIKGGSKRASAMSNRPAMFVANVGNGCTTEESSDLEFPDPGPDVSNDSQ
KTAGPKGTCAKAGSGGGSGSGSGDGAAPSAAPSAPADNGNNGGNNGAAPSAPAGGNDGSYNPGNDGGSGA
APSTPAAPPAPTKPASDTPDVPGGVFVTAPQPAESTAAPSAPSAPADDGAGSSTLLTMTKPAPAAPTSVV
TPEPAPSAPTPPAAPSAPDTGAGAGGSGTEEKAGSACTEEGQWNCIGGSKYQRCASGAWSVVQSMAAGTT
CSGSKTQAMAFGFGRKLAFRFRRA
>FGMG_002206-RA | FPrate:0.394 | OMEGA:V-399
MGVFSLLFALLASLVSIVVAQIPFPHSRQPGLSVEVLPPLPTSVAPEPTTVLTVDCLFCSVTDGEEVPSV
TEWDPSVVTITEKLTVITDEFTREYSTTYGKSSETIICAPLCHTLVTVPWRSGESKAAAVTPSPIMTSCI
TIYNTPISSVETLTSPYLLTSTSCSTTSTHMSHWTWEQPGTLVSTGLASSELGIPPLSSVDAVESTVTYV
PEVTDTFVLTSKTKVTLPWSFVSIETSSTAETLTESVTEEVPVSGPCTTDITVTMTKTITETWESKTPST
ATLLRTISTVLVEAYSTSTGEVVVEGTKTELTTVEAMSLGADCSEAPGKCCAACSVTAESDSASVETISS
TFVSTLTTVEEYVSSAGGSVVPAPSETVIPGSEVSPPTTSLTVVETTTVSGSEAETDGVTSFRLREPLM
>FGMG_002527-RA | FPrate:0.394 | OMEGA:E-234
MKFSIVFAGLFASTAIATPQGNVTPNTMGALEKRASFPIPASKGSVTYKKVEYISGTFDGGMKTYGRGVK
CTGQAEGGDSDAVFILKNGATLKNVIIGADQIEGVHCEGSCTIENVWWKKVCEDALTLKGDGNALIKGGG
ATGADDKVIQHNGLGTVTIDGFTVVDFGKLYRSCGNCKKMGTRNVVVKNVKAYNGKVLTGINSNKGDIST
ITGTCASSVKEICVEYQGTTPGNEPKKIGSGPSKACKYSSVSSC
>FGMG_004056-RA | FPrate:0.394 | OMEGA:Q-112
MKFSAAVFTFIAAAGVSAAPAEEKARYCRSDDSICNWKFGIDTGNGKPYECRHDVKGPGASKKRSAGPTT
CGDFTVTSGWSDVFGADNGFTTLSVVSNSKRQIIWPAYTDKQLAGAKIVKPDQSYAPASLPK
>FGMG_004646-RA | FPrate:0.394 | OMEGA:N-266
MYTSTLLLTLAASASAHIASWNKGMYCRGGNDSSVDNANTNLAVNPLYDLPKSKWWMQADRGCDAVPPPK
GEFLELPAGKSFMTELANNRAFTTLSYKGALTTDWQDGKNRSMPWRGPEGGCLMDGGDGSGGELHTKNIE
STGGTAWAISYESDISKVTMDNLVVFSVRYYSPFFRETWYDVPADMPECPEEGCYCAWLWIPDGCGQSNM
YMQNHRCKVTGSTSTKKLGKPKPAVYCRDNPTKCVPGPKQMMVWHQAEGNNVDPPNGKTPTYNQRMGFMD
GAQDDIFVQ
>FGMG_005190-RA | FPrate:0.394 | OMEGA:N-331
MFRLSSIITAGLALISSVNAACGDGTPQGVVSGSGSSFTATVNGANVYSGSDYRLAIQTALDRIGTNQRV
TVRASGSIGASTIVVTSGKTFEVCGTMNVVYKAGRGAIEAINQNDVKIPYLKMTGNPYFGMRFSGTRNLA
LGDITMNLSGGLGIRFDRDANWNYGVTMGNIVVTGAGSHAVETFKIDGLTIASVKARDVGESGLLIQESR
NVRVGYVEGNNVGAGTGYATLRFANENGKLNNVYTTTNVFVDKVYSRGGGRGIFCVSQSGAAEIKSIDLA
NNGNNAILIENCYNLAIRDGVINGGGEVRVSARSEFPNTSGIYVKAQVNNNSVRESPCAENIYWGITGNA
KKNVC
>FGMG_006782-RA | FPrate:0.394 | OMEGA:S-405
MHFSQLASLALVGSATAWLPHERDLASFNQTARFEQLGKRFKPKLGSGITKIRGVNFGGWLVCEKWLQED
TWANKLQCGNSLSEFDCMNDHYKGSNRETGNQRFEEHWKTWINPDTVQSVHDVGLNTIRIPIGYWSYTAI
VDKASEPFADGDRMLPYLDAVVKKAADLGIYVIMDLHGAPGGQQEDVFTGQNNKPAGFYNDYNFGRAEKW
LAWMTNRIHTNPAYSTVGMIEVLNEPVSRHDGGNRYPAPGQDPGLIQKYYPAALKAVRDTESGLKVSNDK
KLHVQFMSSKWDSGDARTQSSIANDALTAFDDHNYIGFALNDNQNSNGDAYKLMHSACTDSRLVKGQDFM
LTGEWSMTSNYDWKDKEFFNKFFTAQQQLYEVPGMAGWVYWTWKTETNDPRWTYSYATYLKYIPTDAVGL
QNNVYRD
>FGMG_008183-RA | FPrate:0.394 | OMEGA:V-417
MKLALVAYALSASACLLPSDSLPHSERSYGLSARQARPEPDFPIGTGDRFNKGKVVPKGLSTSDRNLKSI
LTPTEVNSALEGLAKQFKEVELIYPPHKTYEGFKTVGAKIGKNPKFFIISGAHARERGGPDNVVYWLSDL
LHARKAGKGLKYGKTTYTAAEVRKALDGGIVILPNINPDGVKHDQKTNSCWRKNRNPKSSKGNPDAVGID
INRNYDFLFNYKKAFSDTIDLSSVASEDPTSEVFHGTGPNSEPETKNVVWTMDKFKSLSWFVDLHSFGGY
MLYAWGDDDAQTTNKAESFANKKYDGRRGVLGAAETPKTKYKEYITKSDLDGQLKLGNRMKKVMENAGTS
KYTVQEAVGLYPTSGASTDYALARYYGKACGKSKLQSYTIEFGEESGSAACPFYPDQKQYHMWMKQVAAG
LTEVALKAADTTPEVKKCPY
>FGMG_008648-RA | FPrate:0.394 | OMEGA:V-274
MPAVNTIITAIVASLAIGAQAGPCRPHRPLGSMIQSQAATTVYVQPIVETSAAYSNAVSKSESEASFSTT
VYAQPTTETSAAYSDAVSESETVASLSTTTQVTSSEKTETTTSGHPAEESTSAVSDSLNTETAINPTTAA
QETTSSLPSTKQEAISTFHTTISVPSTTSQAEDVPSTTSTEPQNTVAPTTTSSEPATTSQASTTASEVST
SSCANKSSLTCGKTGFFANADNMLLYILPNHDLEACKAGCEANEECKAIGINTSDQCELYKTSVSALGFE
ARDPWYFSVYDVCCFEDEQ
>FGMG_009844-RA | FPrate:0.394 | OMEGA:S-243
MVRAKILATAVAACLVNNANAGACKPISSSVAESQSTLSAISSATLSIATETSIIAETSTASGTSILAVT
TTSQFPELPSTTSDSTTTALAAPVAPVCGQYGTCSPSSDGCRSRIAGSSPLYLGECQDLCRADANCKSII
YNTRQGDCFLISNVAQDAGFYQDSSTESVWYDNSCEIEKREPGPICGAYGDCNESKCYPVPQQGSFTAMG
CQQACSADENCGSFAFFPTFNGCYFLTKSLFKSGFYTKETSLGWWFDRVCVIQEVD
>FGMG_012245-RA | FPrate:0.394 | OMEGA:E-399
MKFSAACVALSIGVATASPVFRVPSLAKVAPPSIKTIRKRQVPQEHSHDFVLTITKEFLDLDNPKEIADP
VFGLLGDAAAAEGAGQVTNLACLKQETADQAFTNAKAIGDLRGMAGSLLFQAIERNSAKVGAASELCTET
AVNPEIAALTQHQDAAGAGAEAVNKAVTLELAKQLAGIGADPNLALLSGTFAPGDVNDATGAGNTCDDLE
PDLGCIFSKGLLVLDASEAEISAAVADVTPTFTGTGGIFATDLVDLASFSVAANTEVADLATIVGGAAAT
DAVATDDAAATDAATATEDAAATATDTAAATETAAKDTAAATETAAKDTATATQGNGKGCAVKTTGTAAR
ATQTAATTITTAIKPGATDAAKDGARKDRENDRADAREGRGGNNREDREQGGARARVGDGVSLPLLKDA
>FGMG_001872-RA | FPrate:0.428 | OMEGA:N-241
MKPSTALSSALFAALAKGAALTKRQSVATCYGDQGPNLNDCDSLIALLGWTGTSTDQIEPDPSGGISFFD
DHHALNCEIGIGWNDPNNRLTITTSSLLPYINIIKDKCIIPSQAGGYSDSVDDNWTQRRQAEGDSFNLEV
LSHAIERPGFRQKVGPSLPSGSSYTVTTGEANTVSVGASFEISGGFFEIFEAGASTSFETSHTVENSQST
QINVDCGPGKNGQIYWVPKWDHYEGTFVPSNTAGDVWNPLDESASDYMIECQG
>FGMG_002854-RA | FPrate:0.428 | OMEGA:K-259
MSSLQILSLLTAATSVVALAGTPNVYANSRRGSCYGEASSDDACCYLSPARLLQNQVWDTRPVSGPLDSW
TIHGLWPIHNDGSIPHNCDTNRTYTNITQILYHAGAEDIVEEMNKLWESADGDNEGLWQDQWVAHGTCFS
SLNRECYGRNYEEAEEAVPYFQKTVSLFKRLPTYEWLRDVGIIPSYSMLYQLSDIQEALERQHGSRVSLR
CAGQRLHEIGYHFNVTGTLQDGYFTDSGAIGHWNDCPDLILYEPKGESKKAIFKFETFHPHTSTDVEDL
>FGMG_003522-RA | FPrate:0.428 | OMEGA:N-394
MLLHTAALVVLLALVQLAVCAEDYYKILGVNRQASNKELKQAYRQLSKKFHPDKNPGDDTAHDKFVEVSE
AYDVLSDEEMRKVYDHHGHEGVQQRRQGGGGGGGHDPFDLFSRFFGGHGHFGRASSEPRGHNVEVRVEIT
LRDFYNGATTEFSWNKQHICESCEGTGSADGHVDTCQHCNGHGVRLMKRQLAPGMFQQFQQRCDACGGRG
KHIKHKCTVCHGERVEKKSTPVQLNIARGAARDSRLVYENEADESPDWVPGDLLVTLSEKEPSYENNPDK
VDGAFFRRKGNDLYWNEVLSLREAWMGGWTRNLTHLDNHIVRLSRPRGQVIQPGHVETVAGEGMPIWHED
GDSVYHKTEFGNLYVEYTVVLPDQMDTNMETEFWGLWEKWRLKNGVDLQKDSGRPEPERAHDEL
>FGMG_004017-RA | FPrate:0.428 | OMEGA:D-72
MKASFVVSLLLSLGVSATPAVDTTTIEDGGFTYTGIDKPLLALRGLEARCDCFPCYSPHADCSPGKCQCA
GDYGCWSCGGGRMQCQPGPGSGQCWT
>FGMG_005585-RA | FPrate:0.428 | OMEGA:D-162
MPSFTTFVAAIAGCSTIVNGAAIPTESTGLQTTTLHRRAVTKEHQLSKREPVTVAILTAAGTAAATAIVN
EAVKAAVSFIGDISNFDAGREAFTVQTTEAMMANNPDPERFQAAACYNKAFSVADPANIDGQSSVEFSLG
ILNTDYECMYIAAPNQFFTEGDGGLINLSFTHTDRCTFDSETADLTCV
>FGMG_005677-RA | FPrate:0.428 | OMEGA:R-100
MLAKVVFAIAFATLGMAMPQRGGNNNNNNGSGSGTLNRRVLRTYAIKDSRVTTEVTVSLFAMTALAATAS
IRNEIWAIKMEAYPSCVEYLQIQAGQKNTRDACAITNICRSCEGTNVTCE
>FGMG_005875-RA | FPrate:0.428 | OMEGA:H-228
MRFSNLFLGAVFAVTSVAAMANPAAEAGSLMERSKHHHDCGKHASYNTEKKECVCHVSGETYHKKHHKCK
KPKEDKKHHSRDVLEERSPKKDEHEHCGKHASFNEEKKECVCHDKSEVFEKHHKKCKKAKDEKKKDDKKH
HSRDVLEERDPKKDKHHDHCGKHASYSEEKKECVCHNKAEVFERKHKKCKKHISLRSIFNHCGRHAYYDE
AKKECICHDAGKDFLKKHKTCACPQGEKWHHIERKCKA
>FGMG_005883-RA | FPrate:0.428 | OMEGA:C-223
MSLSQVLVTTLCLIASQAHGIPLSPSKISSRQNPPPSSYPLKGGACGNEWKYLNFDTNKDGDRAHLELLH
DVICSGELRGIASWGAFAATERQTSENVVYDLFFDTEDDTPAKVDDVLMNIAGETTEGTDIKCESLDKYP
STKMDTFSRVALHETLHYSTIGPQSKLKEEIGDQFNEDGERAYDPERAHGLNDPKQDNQPGKSENNADNY
AWMSLDAIISNRCIIETTNGEKPWHSFFPDPPPKYA
>FGMG_006793-RA | FPrate:0.428 | OMEGA:N-390
MKFSPLLLSTLLANTVVGQTPDKTQEKHPKIETYRCTKAKGCKKATNYIVADAELHGISQANGQSCGNWG
EAANSTACPDEATCAKNCKLFGMNEAAYKAKGISTSGNALRLEMLRNGQSVSPRVYLLEENKNKYEMLKL
TGAEFSFDVETQKLPCGMNGALYLSEMPADGGKSTSKYSKVGAAQGGGYCDAQCYVTPFINGVGNIKGKG
VCCNEMDIWEANSRATHIAPHPCSVPGLYGCTGAECQKDGICDKAGCGWNHNRNGVPDFYGRGKNFKVDT
TRKFTVVSSFPADKSGKLTEMHRHYIQDGKVIKSAVASHADDYIRLGGTEEMGDAMTRGMVLAMSVWWSE
GDSMEWLDGQGAGAGPCTKEEGLPKNIVKVEPNPEVTFSNIRIGEIGSTHAVKMPRVYGAHRL
>FGMG_006956-RA | FPrate:0.428 | OMEGA:G-104
MQILNLAAVSLFIGSSLAADCFGAAGIGNKFIEGYWDARQKMCSNTECTYQQPCTVTTSKKYTAIGSATL
QIEFKRKNTAGKAGYKDCWDATEDIIIQCISGYGQDLLAKVEELFDIKDLRRADEHQGS
>FGMG_006960-RA | FPrate:0.428 | OMEGA:R-112
MKFSLFTLAAAVPALAATVPASVDTSQVDKRADCKLTLQWLTNWSEDALRRYRVQLITEPRNDDHIKKYC
DLIKADASGVHNVQCFWTDDGKYVIDDSEGEGSPGHGQYLSRFNAAAKYFEWATGCDTVRNL
>FGMG_006973-RA | FPrate:0.428 | OMEGA:S-66
MKSSLLFVSTLATLAHHAIAASCTTGINYCGYNLIQKGNYRVEIARELLKYRQDVNNHNMYHSLFSCGEG
GAGWIGYLGTCDGNCVDGGSGKSDGCW
>FGMG_007010-RA | FPrate:0.428 | OMEGA:D-433
MLFLLLPVVLLALLRSSAQTQAKPLESDSSVAYATYINFAEHDILDNDDGLPTHPLLPDYGKVTYPITTD
GNGREQVEAHLSYWEGKYWMYAATWGCGGSIFVYGRLTGMNWPASPTYPKGDYGEDGNCGIKSYMSSDLV
NWQLTDFYQPAAEVANVTKPLVRYSKATGNYVLFMGGNTHSNFYYATSKSPGGPWSNPPSLMTGDYLTHD
FDIAVGPDGAHYILTDTWTSVFEIQATGHSVPVWDIYVQKLAPNLTSTVGTNSTSKLIRTAKELLKQGLN
LEACGFFYHDSYWYQTYSYTCQNCAEYIYYLYAKDPLGPYTDGGYLSLDGCGGQNKGANVLPSAKGPIVV
AGNLAYRTSPTDHVVNGEIWHADNHQAASSTSFFPLEFNDDHTIKTFTCPATVKIPLVKKHHLLSRTAFT
LSAGLPYPQLADDSTKLLPAKTGFDFGVSRVAKNR
>FGMG_009875-RA | FPrate:0.428 | OMEGA:T-340
MSFKAAATLVGAFASTVLAHGTVTGIKVDGVYQPGYSLDSYYAAQSGQKIPDIAAWSAENLDNGFVAPAA
YGTKDIGCHIKAAPGHTSMPVKAGGTIEFQWSQWPDSHIGPVLTYVAKCSGSCTKADVSTLKWVKIDAAG
LKDGTWAATDLIKNNNTWTTTVPTSLAAGSYVFRHEIIALHGAASKNGAQNYPQCFNIDIKGNGTDNPEG
TLTTKLYTETEPGILFDPYKGATKYEIPGPAMYKAGSSKPIIPIIPSNSTMPALTPTPTPIVTPTGFVTS
MTPGPALQARENTSSRRVTLKPRATRKFVTLKVRENTSSKLATLKVRQATTTTSIVAEATRDAVNDKRGC
EASHRHVGQI
>FGMG_011915-RA | FPrate:0.428 | OMEGA:N-339
MFSSMILLSGLVASALAHPTVEPRASCTFTDAASAIKGKGSCSTIILNNIAVPAGTTLDLTKLKDGTHVI
FQGKTTFGYDTWEGPLISFTGNNLLIEGANGHSIDCQGQRWWDGKGSNGGKTKPKFFSAHSLQNSNIKNL
NVINTPVQAFSINGVTNLGVYNVHMDNSLGDTQGGHNTDAFDVGSSTGVYISGAVVKNQDDCLAINSGTN
ITFTGGNCSGGHGLSIGSVGGRSNNDVKTVRILNSSISNSDNGVRIKTVSGATGSVSDVKYDSITLSNIA
KYGIVIEQDYENGSPTGTPTAGVPITDVTINKVTGSVKSSGTDIYILCASCKNWTWTNNKVTGGKTSDKC
QGVPSGASC
>FGMG_011932-RA | FPrate:0.428 | OMEGA:F-256
MRSPIAFCLALLGAAQLGDAASAGCGKAPQSSGTKSMQVNGKNRQYILQVPNNYQNNKPHRLVFGYHWRD
GNMNNVAQGGFYGLQGLAGDSTIFIAPNGLNAGWANNGGEDITFTDQMLKFAKDNLCIDEKQVFATGWSY
GGSMSHSVACSRPNDFAAVAVISGAQLSGCNGGNSPVAYLGIHGAADNVLGINLGRQLRDKWIGTDGCQQ
KNVNDPGPGAQNHVKTTYTCSRKPVTWIAHGGGHVPDPTGTNGVKFAPGETWSFFNAAVGGSRSTARRS
>FGMG_012038-RA | FPrate:0.428 | OMEGA:N-63
MKFSILSTIILAQGIVAMPWTSKQSNGEEITLRIQISDGSSSIVHPKPKGTINVENYEVCLKNAKKFGDG
DYPCWTCCKKTGDDDL
>FGMG_000048-RA | FPrate:0.463 | OMEGA:Y-255
MVSKLALALFFGNALAGLAGRALPPRCAVADPTAEQVQHAQNLKKIESVSKVAAASITVDTYFHVVSSSS
SKYISKAKLTAQLKALNDAYGPNDITFKLIDTTFTTNTNWAAGNNELAMKRQLRQGDYKTLNLYFTDIAK
LGGTEALGYCYFPEPNVSTGSQKFILDGCVIVAETVPGGTAAPYNLGGTAVHEVGHWFNLFHTFQDGCNG
GDLVSDTPAQARQTSGCPARMDTCPNQPGDDPIHNYMDYSDDVCYEEFTPGQQTRMHSAWTAYRK
>FGMG_000078-RA | FPrate:0.463 | OMEGA:Q-221
MYSRRFIAIATLIGSCVASPCKPHSPFSTTTIATFNTIEATSTTDTTDSWSAIETTTVFTDTTTFDTHEA
STWSTEVLTFESTTTVEPTATTETTKNVELTTTTIAVDAPTPLATFTLKVGNSVQMDLNGETIKIRDRSP
YFIYVRAHPAIASQYQTATFSIEPSTNYLKIGNLYVVAAPSPNSSLSAASSLDRTSYITCTPPIAAGETL
ACVVKGTTRTQWMVTTGIGEKGLFIRDVGPDDGFDSFDVIVE
>FGMG_000905-RA | FPrate:0.463 | OMEGA:M-44
MKWLTLVLTSAAVVAASPIASLSSISPTGPCPQSKIDAILSGEMDASECCSYGRCKGDVVVSVG
>FGMG_002233-RA | FPrate:0.463 | OMEGA:D-126
MLFQNMLFAATIGLAAAASQPTGQECGRKVAPCSKDAVCKPTLANCKDINKCPGTCYFKNEYQSCGGFRA
KPPPPCKKNTHCVDDPRTPGDCGMACDKPGICAPKKPQSCGGFAGLSCPKGLYCYDDPKDECDPKKGGAD
CPGICL
>FGMG_002399-RA | FPrate:0.463 | OMEGA:D-215
MVSRSILAVAAFAVSFLGAEAGPCRPTTATSLAASETSSTVISVPESTTLTTLIETTTTAVAEATTTSAD
EVTTTAEAPVCAETQVIINPGFDDNNSLSPWTGDGTKTTFSAYSEPNAADLEFENGGGSGQFAQNLPTLN
GDYVLSYRWSAALAYNLGSGFSCTIQPKIGNDALTAAYPDNLSNWKLESQRWSSRGTTLAGAAISFSVSC
SGEYDALGIFFDDVTLTRDCGSATPTD
>FGMG_002477-RA | FPrate:0.463 | OMEGA:G-361
VNFNVVAGATACCLLAALYCRSAFITQTPRIVRAPSQKVTRQIDDDTGGDESRSYLPTSLPGGRNVETSY
GVIRVYEWGPKTGRKVLLLCGISTPAVALSDLASALVGKSCRVMLFDYFGRGYSDAPTNVPHDVTLYLTQ
ILLVLSSSEIPWTGNKSFSIVGYSFGGALSMALAEYFPNLIDSITLVAPSGLVRDYHVGWQARLIYQGGW
LPGDIRRALVKRRLYIPHPPASLSDQNGTFRVGSSDATSGPDYDYAATSKKTPAVTVSDVLNWQITNHPG
FVDAFISCINYAPIFNQNDSWTSVGNTLRERRQADTTDTGTNKVLLILGTSDPSIVTEEIIADATASLGE
DGVNLIVLDGGHEIAITQGVKIADILSSHLVASTDQ
>FGMG_003877-RA | FPrate:0.463 | OMEGA:W-243
MLFVYFFALISLAAAAAAPYENSSNACQNPTKRVEWRQLKDADKQSYIDAVKCLKTKKSRLGLETSLYDD
FAYVHFQYNPSIHFVAAFLPWHRYFTHVYEGALRECGYTGYATYWDWTKDVKKLTKSPVMSSKLGFGGDG
SDTRTENIYGTISAKVREYIPHCLHRRVTDGQTSGSIDLAELYNGTNVAIVQEDTNFLTYHQALEQGPHQ
AIHTAIGGEMNQATSPNDPIFFLHHTQVDRLWWQWQQANPKTRLREYSGVTRSLDD
>FGMG_004305-RA | FPrate:0.463 | OMEGA:L-390
MGPLHLIFALIAIILCPVLSAVVRSAVGPESWDLSTSLNGFSFERARALSATKSPDRTGVYVSRLKRLKT
KNDPHEKDTPRQNITAVGAFSTAYAIQCTWDQTPVWLIFDTGSSDTWAAKTGFRCENSAGDKRNQAACNF
GQPHIPEFLKDISEVYFHRRYGSGEDVAGPMGTSDIACGGVSVSGQQVGLASRAYWHGDNVTVGILGLAY
PSLTSGYIGDPDDPVDDSEWNNYPYTPWLTNAISQGSIDPVFSVTIDTNTNDGVLAWGGLPPMHWHPRSF
ASTDLIIAKLVERDVTAWKPSFYTIIPDGLQWGTLAEAIAKAFDPPATYMVQWEAYFADCKAVPPHFAVI
ISGVRFWINPADLIYEELKDPSNEKCALAISTGKSGPYVLGDVFLQNVVAVFDVGGAEMRFYSKD
>FGMG_005864-RA | FPrate:0.463 | OMEGA:Y-317
PALLQLFLCIICLHHDEQSFLLALALAAVRVQAQEFTNMDLYSEETCNPDPNDLDVQSFQLGVNTQTDDK
GNEYSGCNSATIVPQGWPTNANGKYPVWIDTAKFGEGCSMLFFNLPGSQEEGDIWPCRNGLYRKIQKDKT
PCGDLELTQKFGYAYCCGSLCNDDAKDVTKLKRAPILKKRQGNDKCIINLKSELYTTFGRQIQVGPEETC
EPDQTTCGQTWTYTAGNEITTSESHTDTTEIGFSEYLVFVNSFSDGYEISKSESEERSVSKSMAPEPGHA
GYPTFTPLLYCAEADLSGDCSREDLGIGGGEVCVQKYLPGDVPDGTWQWSPPIKCTY
>FGMG_006927-RA | FPrate:0.463 | OMEGA:F-171
MQFKTLFTASLLSGLTVAAPEPKTFGLVALRSGSPFHLSSVSASESGFSLLLPKGKQGAKCADNKKEDFA
TFRISKDKKLVLYHKGKEQQIAYTDRSGMGQGVLQYTGQKNYPRNAETEGWKVDKDGNLVFGSNNAGFMA
CPGLKSTDPWSIWVATGTDHPGNSEKECYSFSARVSETKKPVSCIYSQYSN
>FGMG_008100-RA | FPrate:0.463 | OMEGA:N-344
MKRFFTSAVAMAAAVAAIPVGRPLIKREPVTTITLTAASTYTQIVAPATPIPIIPTGTATFPGTPVPVPD
DQKPPNGSGSKLPCVTCSPSGSSSSGSSGSPGGSNGSKLPGISYAPYRGDHQCKSGDEIKQDISDLAGSY
SLLRIYGTECDQVSKIYPCAKANGMKLFLGIWDINDVQSEAKLIIDAIGDDWDVVDTISVGNELVNNGAA
TPAQVLAAVDEARAILKTAGYNGPVLTVDTFVAVQEHPELCEKSEYCAINAHAFFDPHTSADGAGKWLSD
TVQVVKSKLSSDKRVVVCETGWPTKGDSNGNAVPGLTQQGSALRAIREAFSDHPDDLILFSAFNDHWKKP
EPATFHAEQFWGIDGKDSASE
>FGMG_008267-RA | FPrate:0.463 | OMEGA:K-254
KKDQTRSIMKTNFLALIGLLAIPSSGEIMDPLPEAASRKELRFQPYLDYDMDGCYNTAAINEDGRINSGL
KKGFSVHEYCRDKQHLLHSNTYSRKRCNHGYCAIMYDYYFEKDQAAALSGHRHDWENIVVFLKGDKVVRV
AATEEYCHLFQKKYRYSRDCMRDEFCDIPSNGRHPKLVYHKVHGDLHSFRFAKIEDGETELEEPENPLGR
WFKSPLVGWDYWPSDELRDALVNWPDKMVNPSIGDKKFGRALEKAAGSGRMVPGFDPYQEKDDEDEDED
>FGMG_008382-RA | FPrate:0.463 | OMEGA:S-431
MVKANSWAITKGLLFLTTLLSTSSVVNADNPIVQTVYTADPAPIVHNGRVYLFTSHDEDGSTNFNMKDWR
LFSSNDMVNWQHHPSPMGLTTFSWANDRAWAGQVASRNGKFYYYVPVAMKNGRMAIGVGVSDNILGPYRD
ALGKPLVENNEIDPTVFIDDDGQAYLYWGNPGLWYVKLNQDMISYSGGVNKVQLTTAGFGSRPNSAERPT
NYEEGPWLYKRNGMYYMIYAANCCSEDIRYSTGPTATGPWTYRGVLMAHEGKSFTNHPAVIDFENKSYFF
YHNGALPGGSGYTRSVAVESFQYNSNGLIPQLRMSTTGPAQVRSLDPYTRQEAETIAWTNGVETEACSEG
GLAVSFINNGDYIKVKGVAFGNGAQSFSARVASANSKGGKIELRLGSEAGKLVGTCTVPSTGGWQTWKTV
DCPVSGATGTSDLFLRFTGEGSDYLFNVNWWQFK
>FGMG_011193-RA | FPrate:0.463 | OMEGA:S-443
MVKFGFVSFVLGSIALPAVAFDNLEEMLESWCLTYLVTISAAASSPTKGQFPSIESSASSDASIVSNPSS
LNFPEETSFAITGNAPIYFNGEDYKVFGATNGEVPSGAITRTFFRDGGILRFQNSRIVPNGEAGFCQTPS
DGQVYITFSSQPAGCIPVNLVVIGVQDCQDGVETSSVIATNSEAEQIPSVSSSGPIISASSSSESATPEI
TTRPEAAVTTQPNGVVTTHNPIIVSNPSSTFQWSNISASFEPPPKTSKSSLIHFSPSIFTSGSSTSIEAD
STTEVIEPQLSTTEGLTSTDALPTSEIGTSTEETSTADLEPTTETASMETTETTKDTTTAETIDTNTEEL
TENPTSTILTSALDSTTETTTEAAMTTTTESSAQIVCPSNPQQCISTFQIQCDTVIGGIPLSSGSSTLEE
CAQACFTDPSCVIFTHSGSQCFSTSDSLDNSGSFALQDWYGIDLEIY
>FGMG_011241-RA | FPrate:0.463 | OMEGA:G-385
MFAKAFTIATLASYASAHMLMANPKPYGNPNNSPLEADGSNFPCKGAVNDGASTNSYKAGSTQQLSFIGS
AVHGGGSCQVSLTTDKNPTKDSVWKVIHSIEGGCPAKNQAGNYPENANFEDPDKYDFKIPEELAAGDYVL
AWTWFNHVGNREMYMNCAAVTVQGEGGSKDYLDSLPDMFVANIGNDCETPPDTDLAFPNPGNSVSKLKSL
LTDPKGPGCQKPGSGSGSGGGSAQPSTPAAAPTSDNGAQPTQPATTPAPGAGSGSGDGSNSAPEIPGGAF
ITVSQPAASQPSATQAPEASATPETPKNGSGEDAGSDKGAGSDGGNNGGNSGSGSGSGGFAAGTACTSEG
EWNCIGGSSFQRCASGTWTPSQELSSGVSCTPGQGADISMAVKRGTRNMRRAQRS
>FGMG_011643-RA | FPrate:0.463 | OMEGA:P-330
MKSVVASIGMIAAVANAYQFPQHAHYRRDYNGTDSQTTLTVKTTVVETITSCAPTVTNCPSRDQTAIAQL
PESDKTTLTATHTVILTEVVCPVADASSIYTSVLQHAETGGVTGKTITADVPMNTGGAYPPSPEKTVVSD
YTTDQVVTLTQGEETITTTIHKTIQKTLTVPAGPEVTDDGSKGKGTPEDDTTTTTTKTTTGTITKTIQRV
GETGPATGGDNGYSTGKSEDDGSKGTGNGNGNGSNNGGSGNGNGNGECSPETVTVTAPASTVYVTVVPEA
AKTNGADDATVTGKTVKGDDSEDDDSEDDSSEDEICDTTTTLEATVTVVPYPVNGTATGGYAKPTGFSRR
LR
>FGMG_000286-RA | FPrate:0.493 | OMEGA:T-55
MKFTAVAITALASVAATSPSGCKPGTYSCTPDKSGWQVCDVTSQWVAAGVCPPKTGCVFYKKSASPYCVP
PGFKFPQ
>FGMG_003304-RA | FPrate:0.493 | OMEGA:C-256
MFPLHFIVFSFFTVAVWAACNGHDELCKRRYSEITFIGAHNSAFVGKQPSQNQYISVTEQLDLGVRFLQA
QTQEKNGDIQMCHTHCWLLDEGPIEDYLEDISSWMANNPDQVMTLLLTNHDALPIEKFDAAFNSTGLKEF
VFRPEEKLAKDEWPTLQKLIDDGTRLLVLMDYNMDESKVDYIINEFDYFWETPFGELDPSFPTCEVDRPE
NGDPAELMGIMNHMLNDNVLGIIIPSQHRAKQTNSAKSIQGQVDLCQGEWSTRPNVILLDWVNVGDAMKV
QLSLNGL
>FGMG_003825-RA | FPrate:0.493 | OMEGA:D-207
MRASLDSSLLLILANALTAKAQAQSCPDIHIFGARETSVAPGFGSTGALIDMIKADHPGATSEAIDYPAC
GGQASCGGVEYGVSAKQGTEAVTTAVNELNKRCPNTKIVMIGYSQGGQIMDNNICGGPDSGASISASNVP
LSASAVEQVKAVIMMGDPRFIHGLAYGVGTCDAGGFDARPEGFVCPNAGKIQSYCDSQDPYCCNGNDAAH
HQQYVNIYGKEALKFVNSKL
>FGMG_004934-RA | FPrate:0.493 | OMEGA:H-469
MGIFKTAILLAGASLNVLASQFPLNDADSPLATTFQVHQSSLSPEHSIRIKEQVDDSICDARVKQYTGWL
DIGNQHLFFWYFESKNAPATDPLILWLTGGPGGSSMLGLLQELGPCLINEHGNGTVHNPYGWNANANYIF
VDQPAGVGFSYLDKDEPIPGNSFVAADSMHKFMQLFTTEVFPDLANRPFHISGESYGGHYIPILGATIVA
QNNLYPKRPQVNLESVLIGNGYVSPLDTAFGYWETLCTTNPGVSEPIFNSTRCDIMAANLPRCLDLARVC
YEHPDHAICSAASEVCWQGVIKWYDGESGSNGGRNRFDISVPCQSDDDLCYKESALIQNYLNLPRVFKAL
GVPSSFGNYSILSWDVAEAFELGIDTGISTQSQIMYLLNHDIDVLMYQGNLDLACNTAGNLKWSNSMEWK
GQPAYVAQRPKAWGAWGEEIGWYKEVKIQMGASDKKTTFSFATVDGAGHMVPQGKPKQALELVNRWLKKR
TFAG
>FGMG_005036-RA | FPrate:0.493 | OMEGA:E-204
MLPSFLLSSLLCLSTVSALPNPILAERAACDCTGTRDGGSNSKEYICRDARLGPLKLPRKLPLSTFVESY
NRFGGLTPAQFLLTWTDEKGSYRYPPQNGFQLDAQGNAINGSMILPVGTMVDRFGSEYGSFISAAAAPYS
QRALPPSNLATNPDTPDFPYNYHVYRVIKPLPVVGGPIAPWFGQPGLGAQFFTGELGNIKFLLEQSYIQA
EDPKTLVHKSDGCA
>FGMG_006610-RA | FPrate:0.493 | OMEGA:P-449
MYRLVSLFLGVAAVSANCPNYEKFARERHEPLSSGRYAFPLQRPSKDCRTYSVPAVEHVIYEEMDQAIGD
PDLYRLFLNTWPNTLDTTVPWRGVSADNAEEELAFITTGDINACWGRDSANQLQSYKSILSSSDDIASLF
RGAINLQARYLTKAPFCNAFHPPPEANLRRAKRSVQPRDTVSPKYDPNFVFECKYELDTLAAFLQLSWDY
YEETEDGEFFGKFGWVEAVRKILKVAERMQEGTYDEQGMVQKPAYSWLRNADSASETVSNHGHGAPVKGH
IGLVRSFFRPSDDSCIYQYLIPANMMFSRYLTSCAKIMRPLDEKLAKKMEAMASGIEYGINQHAIIQHPV
YGEMYAYEIDGFGSYSLMDDANLPSLLSIPHMSYKPASQHVYDNTRAFVLSPSNPYYARGPVLNATGGPH
LGPGMAWPMGLIVQLLTSDDDDEIVDGIPSMRSTGRDHGSRGPMACLAK
>FGMG_007003-RA | FPrate:0.493 | OMEGA:Q-446
MKAGLTSLLLAALAGSSVAQTNKINAAKFNEDYLRASSAPNAVGMAELRQRKMALHESEAAAGVFDKDRY
KVLSSSTPCSGGKAGEYSCNNIDLKGFLRHQDMGSRTRVGNDIWGWTHSSGREFALVGQSDGTAFVEVKK
DGSLTYVGRLPTQTVASSWRDIKVIGNYAYIGSEAAGHGLQIFDLTKLLNTDPKNPPTFSIRSDLAAHFS
GFGNSHNIVANEQTALIAAVGTAYDLKCRAGLWMIDVSNPKRPQDAGCVASDGYVHDAQCVIYRGPQKAF
QGREICFNYNEDALTIVDISRRTMPRQLSRTTYNGATYTHQGWVTEDHKYLLLDDELDEQEKTGPAADQH
TTTYIVDIQDLEFPVFRGVYKSPVRSIDHNQYIVGGISYQANYGSGLRMVNVSSINQDDTGAGFKEIGFF
DVHPEDDEVGGEAQFYGAWSVYPYFQSGNIVVSSIERGMYSLKYTG
>FGMG_008875-RA | FPrate:0.493 | OMEGA:S-336
MFSLRNVVAGAALALAGVAQAWHTEYPPCLDPFQPYVAAGCFQDGAQGSNAGALIYRSGQNQYNMTVEKC
VAECKGNGFRYAGLKYYGVCYCGSTVGGAQLADNQCTYPCTGDNTETCGSDNALNIWQDPTFKTTNLGGV
VTNLPGTVQSIAGYKPNGCYTDNSSKGRALTWPMDIDSSSMTPTSCLTACADQGFPLAGLEYGGECYCGN
VLANDTAKANVGDCNVPCNGDKTLLCGGPSRLSVYISMDLLSLQPCGYTPGSSSSSSSSSTQSSTSTTSA
STSTSSSSSSSSSSSSTTTLSTIVSTTTNNGPYPPPSSTNNGPNPPSSTNNGPNPSSSTNNGPNPSSSTN
GPNPLL
>FGMG_009658-RA | FPrate:0.493 | OMEGA:Q-469
MKFFNALLYGALLFSEVSATKKLTASQVEGDIKKSKLRKTLVDLNNIGKKHGGNRAFGLPGYKASVDYIY
KELKKHKKYLDTHIQPFNYTFEQTRDIQVRGPDGEDVYVITLIYNVGTPAGGVTAPLALVPIDDTRGSGC
FADQWEGVDAKDKLVLVKRGSCAISDKLKLAKKAGARGVLLVHNAPGEGITSATLSAENLELIVPVGVIP
QEVGNAWRKRIEGGESLEVTLLVDSFYETRETWNIIAETKQGDPKNVVMMGAHLDSVQEGPGINDDGSGT
AGILEIAKSFTKYTGYKNKVRFAWWGAEESGLAGSYFYGEQLTEKEADSIRFYFNYDMIGSPKPQYWVQA
SKPADRVGGDILAAWLRKKGKTVEWEEFGESSDYAAFIALGIPSSGIFTGADAETDPCYHLACDTIDNIH
WDALTLNTKTAGRAAAQFALSLKGVPARDKTTPNPKNKRAIAARFELWQKKKTLASNSHKCNHSTKEVV
>FGMG_009703-RA | FPrate:0.493 | OMEGA:G-348
MIKSLALFSLIAAASARKCTNITVPVTITSENAIFSIEAPVTEIDVTNLAINLARQGGTPYPQTIQMGKA
NITGTYDLAATYCEPDAGPGEQLQIMTHGIGFDRSYWDFPFNNYNYSYVARAVDEHGYSTLTWDRLGIGA
SSKGDPVNEIQVFLEIAALKALTTHARQGSLPGVGCGGYSKVVHLGHSFGSVITYALANESPELSDAIVL
TGFSQATAYLPWFAVASNFVPVVDSPIYPPGYVAPASTVGVQINFFAEGDFDPEFLKVAFEKGQPVSPGE
LLTLGAPAGVNNTYTGPVQIITGARDIPFCGDNCYSTASVGGKLPSLLDFSKQFFTQASRFNTTVVPGAG
HGLNFGYSHTFTYDSIFDFLSE
>FGMG_009835-RA | FPrate:0.493 | OMEGA:K-477
MRSSTPSVLGWAATLLVSAAEIAAMQQDNCCALLEAAGLKHVYSPSSDGYKTRTDSYFSISSQLHPYCIV
QPEGTGDVSTIIKTLVPDTTCNLAVRSGGHTVWGANNINDGVTIDLGLMNKTTYTQETKVAHVQAGSIWR
DVYGALEPFGVTAAGGRTSTVGVAGFLTGGGNTFYTARHGFGCDQVVNFEVVLGDGRIVNANKTENADLW
KALKGGSTNFGIVTRFDLQAFDAPLLWGGLVTYTTETTDAHVEAYKNWTDNIEGYQDGSVIPFWSYTPQA
GKIGITVSYEDTTGVVAPKALDAFWKIPYETSNLRKDTHRNMTVELELVAGYRNVWFAITFKNKLSMYNK
ALELHKQFVSDWKAQSPDGDFICHAIFQAMPTVFSKHSLERGGNVVGLDREKDNAVMFQVQHMVNGVEQE
KLARERMVKFRQAMKQYSVDEDAAVEWEYLNYADFTQDPLSTYGSENVEFIRKVAKKYDPEGVFQTRFPG
GFKITKVA
>FGMG_009903-RA | FPrate:0.493 | OMEGA:D-120
MLFNAFTTATIAACTLLTTPALANPIDTLPAGLESHLQTRANDVTVKFWDSTTCRTSRSRKSFNSGHCIK
ALAGKDHAVSMQERKSAKCHMIRYREKNCVGYSEKVFNLNDCFNIGDEWDSPQVPVLDSTRSSYFSQPVV
GYLR
>FGMG_010081-RA | FPrate:0.493 | OMEGA:D-298
MLYPSLLRLGFAIGALAGHGHAAPAHTNDDLTDTPLPVVVWHGLGDQFNSDGMKGIEELAEAINPGTFVY
IISLNGDPSQDRSATFTGNVTDQISQVCEELSKHPILSTAPAIDAIGISQGGQFLRGYVERCNWPQVRSL
VTFGSQHNGIVKFKACGQNDWLCKGAMALLRFNVWSNFVQSRLVPAQYYRDPSTEQDYNNYLENSNFLAD
INNERELKNVKYKANLGSLTNFVMWMFEDDTLVVPKESSWFEEVNGTESIPLRARKLYQEDWLGLRGVDR
NGGLHFRSAPGDHLQDLDLDTVIVTAGFVLILPMAPIHDD
>FGMG_010891-RA | FPrate:0.493 | OMEGA:E-80
MTYVILGELYLTLLCGGLSASNFSYFSGPCNFIPEELTWVLAICSGFVPKRSTWCDNLLLQSWTLSETDR
SHYRTEKVTETMTDKVTVTETPPPETVTKAS
>FGMG_011877-RA | FPrate:0.493 | OMEGA:I-347
MIVKTFVTAFLAASFMADSQASPCKVNSRTIDTSTTVDVTSTFAEAPGTTETVASTTGVSSFEDTTFTIS
QAETSTESSAISEDVIPTDLSTTDLDSSVAETSTATSTVSEAIITTFGLTTETNSITIETGTESTIPEDF
IATAISTTDLSSTIIDGSTKTSTISDDATTTAASTTDLSSSIVDTSSETSTVPVDITTTAIPTTSAESIT
VVEETTTTTAEAAVFTGFLVNSGFDDTDTVQPWGHSPRAFTSFTIDSNTKHDGRHSACLTSSRPGNFGIG
QDLAAPVQAGINYLGTAWIRPGTGCHTASLACTYADGFGAKASYFSLTSPNQWTQISFTCVYNQNHIDRG
GLALFLGFDCLASSSTSWVDTITFDKQ
>FGMG_011995-RA | FPrate:0.493 | OMEGA:Q-213
MHAPSLIAVLSTLPAAMACLGYTGGVPKATGTKSLSAPRYLKKGEVFDAKWVRYDRGVKCTGQSEGGEKD
AVFVLEDGATLRNVVIGANQKEGVHCLGACNLEFVWFEDVCEDAITIKGSGTANIIGGGAYKAADKVIQH
NGCGHVNVVNFYANDYGKVYRSCGNCKGNSKCKRSVHMEGVTAVNGGELIGINTNLGDKATYKNNCFPKI
QCQGYKGCDKANGECEPSKASKC
>FGMG_003362-RA | FPrate:0.522 | OMEGA:V-278
MKSFTLASAFLAAAAVAQPHGSPHGVHHRRHHQNDKRDVVTEVEWVTEVEYVTKMVDATTTVWVRPEAAT
SAPAVEETPEAEPTTAAPKKEKKPAPPPAPTTTMVTSVYTPPPPPPETTTEAEVAPEPTSEAPAPVETTQ
APAPKPIIKAPVVKAPKKEPEPEPTVEAEPEIESPVVKAPIQQEKVAKPASGGSSAAKSGEFTYYDIGQG
ACGQDDSGKDDSINIVALSHLLMGPSSNDNPMCGKTITIKANGKTAQATVADKCMGCAMDDIDVSRKVYM
EIWGSLDSGRTEVEWWFN
>FGMG_003756-RA | FPrate:0.522 | OMEGA:S-132
MPSPKNTCFILLSFLAHSAVATPSGRTPERSLQDIDTVVYIRSDDSGFYKSQDMTQAIKVKQAALPIHKR
SSAKVEACFSPQCTNCRVIYDGSLSSNSPCVQAVNTACLIVSNLNDAKIQAWNKAQCNGNKSTFRGCGAR
TNFAAPGTNSIGVHIGCS
>FGMG_004788-RA | FPrate:0.522 | OMEGA:S-120
MKFSILATFTALVSSATAANQAVVINNCPTTIYVQSFPYNGAAPGALTALKPGQKFAENMRSSGSTVKIA
TSRTLTKPLFFGYSSTSKPNYVYYEFSTPGAGCKLFDCRAGQADCYSTKSMKKVFGCPSPTTVTATICAK
>FGMG_005083-RA | FPrate:0.522 | OMEGA:D-429
MTAYKLFLAAAFAATALAAPVEERQSCSNGVWSQCGGQNWSGTPCCTSGNKCVKVNDFYSQCQPGSADPS
PTSTIVSATTTKATTTGSGGSVTSPPPVATNNPFSGVDLWANNYYRSEVSTLAIPKLSGAMATAAAKVAD
VPSFQWMDTYDHISFMEDSLADIRKANKAGGNYAGQFVVYDLPDRDCAAAASNGEYSLDKDGKNKYKAYI
AKIKGILQDYSDTRIILVIEPDSLANMVTNMNVPKCANAASAYKELTIHALKELNLPNVSMYIDAGHGGW
LGWPANLPPAAQLYGQLYKDAGKPSRLRGLVTNVSNYNAWKLSSKPDYTESNPNYDEQKYIHALSPLLEQ
EGWPGAKFIVDQGRSGKQPTGQKAWGDWCNAPGTGFGLRPSANTGDALVDAFVWVKPGGESDGTSDTSAA
RYDYHCGIDGAVKPAPEAGTWFQAYFEQLLKNANPSFL
>FGMG_005643-RA | FPrate:0.522 | OMEGA:R-339
MRATNILIFGASGLRALAQVPNHLNQRAACNRDNLFRCFIDQRYSSQASEFCTDLAPFTATVATSIVTMT
TTLETILTAIAAQVTEVHTTTVFTETVPSSTAVITADTTGAVKRQVAANPPKCMTNGVTYPASRITSACS
CIDVPASTVSVTHVVGTEAVTEINTIVTTPLATVTSWETIPTVTTTGISTVTVLPPGMNRLVNGDFETGD
MTGWEVSPDSWEAEIYNMVTPQTWVCVVDGPVESLGSLRQVKPVYLEAGNYEVGLYAPLAPFPMATTGWE
GVVVFKLVNRLRQMTITPKFAPTRQIAKSGRLVVPLQARFLVPEAMDGYYEVALAYLRRPPQVPRKANSG
VDELYLKRV
>FGMG_005881-RA | FPrate:0.522 | OMEGA:R-342
MIAKSFALALFAATAVAGPCRPGQTTTSGSITTDSVFVTSTTAEASATTTSVSEPAGEAVILQINRIRRL
SKRDTTFVGNDNPSDCTFASVFRLDNGKLLDNGVPIYYAGGERQELAANGQPPADAITTTFSVIGGKLVW
ENEAFDEAGFCYLESDGKIYITFGSSVGCEPVSLTVYKEAQCQNGQIVGFETSSAAAEPTSTEASTTASA
DACVVGVGGPDGEPPLTSRIADCSAFNVVTVSPLPVTTTVVKRELAVRIPTGKYTGQPVINTLARRAEGE
PTATTILPHNVPGYAGYCDSPEAYYEACSKAGVTAFTTTLSTSTTTTETTVTDCPMRKMAKRAGQAVGYE
FEDNWEAYNMPGYKLF
>FGMG_006951-RA | FPrate:0.522 | OMEGA:V-280
MRIKAFYVLASSLAFHSAAVASACKPRSSAPITLSLSTSGALSSTLISASTTILTYDAFTTGGVSTVPTT
SEAVVSTDAASSTSEAVVSIHAISSTESSIVESTTSAEPSTETLSTTAIVSDSSITTAEVPTSTSITASA
ATTSQAPPPLFSAIALYHNHEPMTSDRVKGHSLSFPNDEKPEHTTSFFSIDPLSSHLLLDNTLPICAFYG
IEDTNPSLGVCPTFISQQVVLITCQIRNDIELVCAAPKVYCSQSGEDVECENLGSEFDSMATVCNQDPYV
CGVIMGDDTMPTRTQMFISY
>FGMG_006961-RA | FPrate:0.522 | OMEGA:S-115
MKFTLLTQAALTISSITEAVANPTPDVSGVSELDKRRDCSMTIKYVKTWVEDGLDRYRHWLITEPREDRH
LDFWCEAVHSVQYFSNRQCYWGDDGKYYVDVSVVRGPAGHDYLMSTYNGACKDFERLTECKAIKQF
>FGMG_007302-RA | FPrate:0.522 | OMEGA:T-463
MRSLSLALSLALVSGVTPRPHITRSEESDEPQLKIPGLPFPNATKSYWQDPPHSIANHRTTKDLPTSEVF
DYVIIGSGISGAATAHKLLDRDPDLSILMIEARTAASGASGRNGGHCKAGNYNGVKSWVEEYGEDDALRL
SNMEQDCVDDVREFVKTHNVSSDFTDVETASLYWTKDSFETAVKNIEFQHKLEEKRPNDVPKNKRTIMKG
QAARDYWKWPEIVGAVTFKAHTQNPYLTVCAMLEYSLNKGLNLQTNTMALNLNQLGKKTKDGAKWEVKTN
RGTVKSKNVVLATNGFTNALHPGIASTNFTMPVRNQVAAVTPEADTSGSKVFERSNSLGDLHSGNVYIAA
RPPGSKDAGSVVIGGSTQMSPTRERWISDDTSINDQIALVLHGAARTVYGYKNWGESTTVIQDWTGIVCE
TPDEFPLVGEVPAEDGLWAIVCMNGHGMAWAYRSAEALVDMMTTGKTPKWFPEQFRAQRAWEVKGYDEL
>FGMG_009735-RA | FPrate:0.522 | OMEGA:S-459
MVKSTLLLGALAAFSSYAQAKEMKVNEDKAHRLYDTGVVHNKLMASKQAVWEKQEAAGAFASEQYPKLGY
TKCVRGFAEAIKGDAKNTFACHNADLYSFLSHADLGSTGGRGSSSWGWTSDDGREFVAIGQYDGTAFAEI
TKKGQLVYLGRLPQYSVPSQWREIRAYKNYVIIGSEAVGHGIQIFDFTKLLKIDPKKPVTFDAKKDLTSH
FSALLPVGRAHNVVVNEELKYAVAVGAQPRDDKNCASGLNFFDLTDPSNPKSLGCAKGDGYVHDAQCIVY
RGPDKRYQGRDICYGYNEDTLTIYDVTDKANVTNIISRISYEGASYTHQGWVLDTQNQEFLVLDDELDEQ
NGAGPGSDGFPVTFIWDIRDLENPKQTGLFKHPTKSIDHNQYVKDSYIYQSHYGAGLRVLDGRSIPSDPT
GAGVYEAAWFDIYPEDDNLSGGGSVAFVGTWSSYAFFKSGYIFINTIERGAFVVKLTEKAFQKPKW
>FGMG_009812-RA | FPrate:0.522 | OMEGA:L-98
MYQLSSTTIAMLTIKSLVFSVLLVGAVQAQETTDDSKHNCCLHIKNASDAWWLTNPDITEKVCEQYKDIA
EFDGETCNGDSIDDADWRSKCKEYGTYLGWTDERVGAGHNATCYPIDN
>FGMG_009868-RA | FPrate:0.522 | OMEGA:K-363
MVAVKTLLVLCALGVQAWAADLGATGVVCSTKLDTVSLAPNQIPTSTTTVVNKITVIKKVVRKANVVVVP
KAKTTTIRTTSVVTTTATADQRVETATSIITSEVTVYSTQTSTSVTTSDSTTVTTKYVTETVPTVPGWIA
IKSESRYVPRHKVRAEVDDGESQDSVEPTPVLYAQRVDCVRKKPTTSIKTVTTKVQGNRVTLKAATKSVM
STIVQVSTVTEYPPDLSTTVTSTVHPTTTSWTETISVSKCPRLVVVESQVPIATEYAACQEGNILITANG
GQIITATSPADIDGMYINNLGANTPTSCCEACHKNPSCRYTRFIEAENKCLAQIYPSRLCPTGELYRQLS
VGRFFTNRNTLIKAKGIYSNGPCGYLVNGGIDG
>FGMG_009890-RA | FPrate:0.522 | OMEGA:D-72
MKLTTILIAYFADLVSTRMSKTRQQSVSCYDRFDAIKDAKAAGCAKISTYLISGTLCNPYGCDCEWGCID
SDGYNDKWIPYKCPNGFGSDVCSD
>FGMG_010910-RA | FPrate:0.522 | OMEGA:Y-218
MIIRFVLFLLILFPCAGSIPGLQNREVTCGSPDKDDYTIIQNPFLGDLDHGQPGIAFTTGYGDNSLRWFM
VYQNAIDFKPYRAMKIPSNTTVFIDLTSSCQTFAGRLVRGADINFDGGVHNLGTWAELNWGSYPLAYGGV
SVIEGNDGPVLLTSEDANTPVLGFTHDIIPTAPEECRVAKDSGGTALKPTDKNGYDEATREFTKRELRTL
KVSIDRSYTATIMSHNGRLEIEFLHGNH
>FGMG_011942-RA | FPrate:0.522 | OMEGA:V-207
MIPATILALLSIASVSQAAAAPKILSSDDIIVLKTDGTSQVMKAADLEALETAPAVKNIAGSTKKDIQRR
DCKDSTEIQVLSDKEFVNWDVAMSPVISSLGGSKATVSVTNGYTITNSLKVGASFSIPLIKDILTTSLSI
DYTETWSSSQTQSLSFTVPEGHHGIIVSQPYVRRIEGNVIDGCTGDAKEGFVSDSYESQAYGNLQWVKGI
IRLCSSETYPIPYCNGEGEHK
>FGMG_001644-RA | FPrate:0.548 | OMEGA:C-367
MLYTSILVALVPFAVAGPIAPRTGLGGGLPGLGGGSGSGLPSLPGLGGGSGSGSGLPSLPSLGGGSGLPS
LPGLGGGSGSGGLPSLPGLGGGSGSGSGLPSLPGLGGGSGGLPGLGGDDSSDDTPSATASNVVAPTASPQ
TSPTAPSSSTGGSTDADGSAARRGIFDGASSGGASNSPFGNFLGGAGGSSSGGSSGGSSGGAAASPFGSF
LGGAGGSTMNDLSGECKDVTVIFARGTTEAGNVGTAAGPPFFKALGEKIGQDKLAVQGVDYSASIAGIMQ
MGDKAGSEKMASLVTEAVKKCPKTKIVMSGYSQGAMLVHNAARALPAETTAKVAAVLNFGDPFQRQAIQG
VPADRVKIICHAGDGVCAGTAAITPDHLTYSKDAGAAADFVASKVQ
>FGMG_001909-RA | FPrate:0.548 | OMEGA:S-148
MLGSKILFLIAATSNVVFAAYGCGEVNVVYTGLPGRHKYVKEQGGDPDVTEKNIEDYTREMREAGYNVRG
IWRGPEIEGSEFAENVKGVDWHAAGVGFGVRGSNMTDLIGLFEENLAIYREEAPDAKFVFNYNPRSFLWS
VKRYFPISTDCKDHPGKDLGFITLCDEACN
>FGMG_002099-RA | FPrate:0.548 | OMEGA:P-358
MPSIKNVLASFALAATIASAHPGHDIAHEAAERRDFLNSVKRSSLTHCATKLKARGVEARNVARRSAQVN
KARAKRVLKKREEESALNKSHNQTEQGFTECTDAAALFASINSCVLTPEVTQGPYYVAGEYVRENVIEEQ
DGLNIVLEYQVIDVETCDPVPNVYLEMWHCNSTGVYSGVVANGNGDSSDETNIDKTWLRGIQKTNSDGVA
QFESIFPGHYTSRATHIHVMVHINATLLANHTLGSDNYASHVGQAFFDQDLISQVETLEPYASNTQEITL
NEDDGILSEEISTDGVDPFMEYTLLGDSVSDGLFAWLAFGINTTVSNSVTPAAYYYKEGGVANGNSGGAP
GGGAGGPPSGMPSGSRPGSTPSATPDAE
>FGMG_003778-RA | FPrate:0.548 | OMEGA:I-114
MKINTLIILALGSLRVAADSDFAATCHDILVSQPGGNANYPKDRFSLYAWCRKEKGAWSESFLNLSKCIA
NDGGNLVARENGGMGGSCRDMRLSGTVLLSRCVNNNGGTTDASIDLNRLVGNRNGALTCFGASHAS
>FGMG_004138-RA | FPrate:0.548 | OMEGA:S-476
MASIQNLIAILSFLGVGVEAAVSFPPLPSDLSTPVQQRIAFGGPNSITVGWNTYAKQAKPCVQYGTSQNA
LDKQACSDISTTYPTSRTWVNSVTLDGLSPATTYYYKIVSKNSTIDHFLSPRTAGDKTPFAINAIIDLGV
YGEDGFTIDMDHSKRDIIPTIQPSLNHTTIGRLATTADDYEFVIHPGDLGYADDWFERPKNLLHGQEAYQ
AILENFYDQLAPIAGRKPYMVSPGNHEAACEEIPVLNHFCPEGQKNFTDFMVRFGNIMPLPFASTSSDAT
AKVNANKAKQLANPPFWFSFDYGMAHVVMIDTETDFPDAPDQPGGSAHLNGGPFGRPNQQLQFLEADLSS
VDRDVTPWLIVAGHRPWYSTNNEGCKPCQNAFEGLFYKYGVDLGVFGHVHNSQRFHPVYNGTVDPAGQQD
PKAPMYIISGGTGNIEGLSAVGTKGPENAFAYADDFAYATIRFQDANNLQVDFIRSATGELLDRSKLFKS
HKQRFVKQT
>FGMG_004407-RA | FPrate:0.548 | OMEGA:N-442
MKLAYIVPSLALWANGACAYKRLSPQQAANDIKGQDLDNYLQKLYNIALDNNNSRAFGLSSYKASIDFVH
KRLSYGDQFDISVQPFTHLFSQTRKIALTGPEGEKVDAVSLQYNHATPSPGGVTAPLVLIPIDDERGSGC
FEDQWKGIDVKDNGASAAIVFNDNPAQTAGSGSLGAENIGKLAPVGVITYDRGNAWADRLKSGETLEINL
IIDVITEKRETWQIIADTKEGDPNNIVMLGAHLDSVQEGPGINDNGSGVAALLSIAESIKQKSFKNKLRF
AFWGAEESGMIGSNYYVSNLSKEEASNIRFYYNYDMIASLQPYYIVYSNSEAHKTGAQYLYEYLTEHGYP
AEYAPFGSSSDYIGFLELGIPSSGISTGAGPPQDVCYHTACDDIKNINKEAFLVNAKAAAYAAASLALSV
KEVPKHEISSTNPSSKRGMARNMARWANVARGAEKVHSCGSERKVFM
>FGMG_004536-RA | FPrate:0.548 | OMEGA:G-106
MSLDGCCAVLFLMLLANKVGSWQAQRRNPAAICCIIRYSLYWVFDRHLSPPPTQSTADAELHDFRSAAFS
STNMEYRDRKDPILRGQECPLKPNTVHVVLYSAQGGGGPSVPTAWGPLQVVDTQPMQRSNRETRRPV
>FGMG_005184-RA | FPrate:0.548 | OMEGA:I-408
MTLDRLLFLLGFWLGLVGAAQAALSSEPLPPSKDPWYTAPPGFENTEPGTVLRVRPAPGNLTSVTSNCSA
SYNILYRTTDSHFKPAWAVTTLLVPELGPESLAHQKYQQSALMSIQVAYDSPDVDASPSNTMYTASNFSS
IYYEAALGQGIFVSVPDYEGPLAAFSAGVISGYATLDSIRAVLSLGLGLNMTNTPSVALWGYSGVCTRAD
NRTRYRCCVGSPLANITSLLYDVNGKPGAGLVPNMLLGLTSQYPDVRKYLISKLNDDSQYNKTGFLAAEG
FTINEAGVAFYGIDINKYFQKGADILSDPKIVALLNQEGLLGYNGTPRWPLFIYQAIHDEVTPIADTDAV
VNRYCAVGADIHFERNTIGGHYQEADNSYEAAFQWLLDIYSGQRDTKGCVIKEVTRNITGTVLQTRENVQ
KSGVDFWRSAW
>FGMG_005795-RA | FPrate:0.548 | OMEGA:S-364
MRSATLLALLPFALAAPSASVSRRTEPAPVIRPRGVKLVDGKYIVKMKAGVRAASVDSAVSTIQADADYT
YTKSFSGFAASLKDEEIETLKHDPNVEYIEQDAVITIKATVDQDNAPWGIARLSSSKPGSKTYTYDESAG
EGTCSYVIDTGIDVEHPDFDGRAKFLKNFAGGRDGDGQGHGTHVAGTIGSTTYGVAKKTTLYAVKVLGDD
GSGTNSAVIAGMDFVAGHADDENCPNGAVVNMSLGGEASDAVNSAAKSIVDAGLFLAVAAGNEAVDASGS
SPASEASACTVGATTRNDTLSYFSNFGDLVDVLAPGTDILSTWPGGKTNTISGTSMASPHVAGLGAYFLG
LGKKAEGLCEYIASQALEGVVAQVPRDTVNKLINNGVSK
>FGMG_007124-RA | FPrate:0.548 | OMEGA:R-99
MRYIIAFLSLLTLVNGQFGGFFDQMFNQQGGHERHQAQSQNNPSDANHYKQNYENSVCDKYLCPDTLACV
HFPHHCPCAWDAQQEKVELAEGQRICVSRGGFRPGETARKIELARKGLL
>FGMG_008350-RA | FPrate:0.548 | OMEGA:N-60
MVRLSIFAVLVTAISSAAAFSVTQACQCLFLDGSHCCVSLKTEDCQAECMGVGRKGVPCNANGKYSQVSW
LTGVGREKCDDTVP
>FGMG_011825-RA | FPrate:0.548 | OMEGA:S-272
MKFLLPILLAAPAVMGRACKAPIPSADSVVPVHAAPVYTTLATHVAASSKPTEAAIEPQAVSRAQGVSKP
KPKSQTKSKSKPKAKSQTKAKPKSKVLGNGASVSGSSTFYGGNLAGGNCMFSTYTLPAGIMGTAFSGQVW
DSSAKCGACIEVTGPHGTIKAMIVDKCPECDPGHLDLFPNAFKAVGGTNGIVKTSYKFVECGITTPLVLH
NKSGTSANWFSIQVINSNEPVKSVEVSVNGGKTWQKTQRKDYNFFENPSGFGKTSVDVKITSSTGKTIVV
NNVGVTPDAQYKAKSNF
>FGMG_002180-RA | FPrate:0.575 | OMEGA:R-387
MLFSQSIGVVALATLTTAAPERKTLATREVGRLPALGWNGWNQGQCNAASEKVALATAKTFIDLGLKDAG
YQYINIDDCWSTRQRDSKGNLVPDPSKWPRGIKPVVDEIHKMGLKFGLYGDRGVKTCAGFPGSQGHEKQD
ADLLASWGVDYWKYDNCYTPCYNGNQADIQTCPIGKGPSSRPGYELMRDMLRNTGKDILYSLCNWGWDEV
WTWGASVGHMWRMSVDNWGKWDDVVRIANQAAPILKYTQPGRYNDLDMMILANGALTPAEERTHFAIWAI
TKSPIILGTDMTKINSAEIKLITNKGLLAVNQDSLSKPAVPFTPPGTPAKASNEIYPYWSGPLASGTVVA
IVASKGNLDTTLSLSQVPGLKDQDYSWTELLTGAKGRGRTVQAKLEKHDIAVFRIDN
>FGMG_004178-RA | FPrate:0.575 | OMEGA:D-474
MRSSNWINPILLASSLSTQCMGAVVSNDQKALINDTAHGKKKNIVFILTDDQDSVLDSVSYMPKLKENII
DKGASFINHFTTTAICCPAPQSGGPVYHKGEHTSDLIAKYAHDLLKEAIDSDNPFFVAIAPIAPHSDISV
DRVAGSGMTIPIPAERHSHLFEGVKVPRTENFNPDSPSGVSWIKELKQFNESSVSHLDNYYRARLQALQG
VDEIVEQVTQQLGDAGLLDDTYIIYSSDNGYHLGQHRLPPGKECGFEEDIRVPLFIRGPGISSGAVEKTV
TTHIDLAPTILKLAGVELRHDFDGTPIPVLDYEEGKRHEHVAVEFWGVAIAEGGFGGFDGKGLLQVHNNT
YKGVRIVHEDYDLYYSAWCNNEHELYDVKTDPGQLNNLFPLDGKATADKEFLGTTVQQVINRLDALMLVL
KSCKGNTCIEPWKTIHPDGKVANLKGALTGKFDSFYEEQVKVRFDRCEEGYLVDAEGPQVGYEYREGLEW
HHWT
>FGMG_005261-RA | FPrate:0.575 | OMEGA:S-177
MKFSIATALLAATASALPTAQDSALEARQLGGSTRNDLKNGNSGSCPGVIFVFARGSTELGNLGTLGPRV
ASALESKYGRNGVWIQGVGGAYTAGVGENALPVEPPLLLSERCQGAALAAAAVTDVDAGIREKIAESWQD
PSYPEDRTKVFCNVGDLVCSGTLIVAGPHLLYQTDASGAAPRFLIQKADAALGAAKA
>FGMG_005941-RA | FPrate:0.575 | OMEGA:N-418
MKSNAAILALVAVASASPMSKRLDPAAWDKKETLCKGWDGNGWDTRTPEGVDKLWEDSGAGGQLDMFILM
QWEHENNWLKNVESQVMDGTSGKSGAAGCGWDKYGQDTIIGKNSYWIFQAAKGVHAKFNELKRQLTDETL
ISSLRIGQMVKDFDGSEDDAGNVLGWLAAASSMGNAVGGLVPGAGNGFAAGFGILGGIFSGLASQSEDEI
DQSTISAALADVFESATKKIEDTLRIVMGGGTEDEYNSLPAPKWDTFQSKITKFFNGGWFLLDDDAAAVK
VAISSISNNIKTKVANDVMKAAKLHLVADKRDGFGSREDCGYSTGRQWMSLKDGEEYCFYIMRNNPNNNR
IKDWVEAEEGIYEKMADYGLGDREKYYRAVLDCALSDADDIDVGNLAWGEIPQCYFNLPAVFIEKDNNAG
CGDPFSDPDCAYVKATPIE
>FGMG_006408-RA | FPrate:0.575 | OMEGA:C-56
MYQCVPLPGLFALECWVCSAHSIERADGLGSSVFCRNSCWTENVLTFLLLSPECLCRNELVFRHCGLFRV
GKEGVSW
>FGMG_008126-RA | FPrate:0.575 | OMEGA:L-198
MHCLFLLTAASLAAAHVPSVSVPACPKYGTIKFSRSVPDGDPFLRTEVDLCYTDTALSLQFTALDEKYFY
FNESQGTNDDIWAYEVVEAFIYKGTDDPQTYLEYEINPNNVTYQAFVYNPSKVRAEGAPFDHFFISDPQG
DGFTAETQLNKRAKKWVSKAQIPLGLFNVDPGCARGTKWRMNFFRTVTSPKMFPDQDLGGWSSPDKASFH
ITKFFGHVNFV
>FGMG_009930-RA | FPrate:0.575 | OMEGA:C-252
MVRFSVLPAAAVTLFLCGVQAGPCRPLTTTGVTSIAASSSTVASDSTATSLDTTAVTTLIDASTTVQEEL
TATTETSIAESVSTIASDTTIASVDVTTTTALADPTTTAAAESTTTTAASACVVTQLFTNPGFDNSDNDI
TPWTINRGAITQTSPQSGSNALSYTFFENANDITVDVTQTLSNLVGTYEFSYYYRVVSVSLNADYTCDMK
LKVGDTSLRGDFDERVGGWKYGSVTFNDLNVAQADVQLSASCGGEYHQIVVNLDSFGFTRVCSE
>FGMG_012144-RA | FPrate:0.575 | OMEGA:Y-89
MFPIMNFFTLVLAIPAVLAAPATEARAAGKQVQACACANAAGQTKIDGYCPYIAGSNVNVDGQNYCFPAA
TWSEYMDTRFTADFCPGYYPGFPKPVCKTVTVCPTIGDYQEIC
>FGMG_012336-RA | FPrate:0.575 | OMEGA:L-467
MHLQALTGLATLAVTAASQTLWSRDVDYKALSKELSASAKVYFPGTEDFDAASKRWSNLDKPTVNIVAVP
ATENDVVEITLGLTQANTLRQVKFANKKNLPFLAQNSAHGAITTLGQMKQGIEIYLNQLSGVKIAKDGKS
VTILVTGCCECVGYVGPALGGGHGWLQGRHGLIADQFESMNIVLANGTLATVDENSELWWALKGAGHNFG
IVTSVTSKTYDAKIKNWAFASLTFKGEKVEELYETINKYILKNGTQPTDLINWSYWFNIPALDPTGPIVQ
ILLMQEGVDVVDKAYTGPFQKLKPLAVDAKKGVYTDLAKWVGVTTEDGPCQKNGAMNPRFPIYLQDYNPA
AQKKAFNYFADNIRGDSIFNGSLVTFDGYSTEGVKAIDSKSTAFAYRNQNILVGPLLSYQSNGTATDEKA
SEIGHKVRDILHEGTGRDTVPVYVNYAFGDEGPKEWYGSEAWRQSRLQELKEAYDPKGMFSFYAPIA
>FGMG_012343-RA | FPrate:0.575 | OMEGA:C-102
MRATIASITFALSGLAAASPQVVPDKPIEFYGRMYADSATCSGTGTRYAYLGSMGNCINKPVPGTGLATM
VVGEVSKYFLAGWTGPDCTGKVVLVVSNVGECIDLGGTDVQSWSNDMKPFGK
>FGMG_000089-RA | FPrate:0.604 | OMEGA:D-113
MHFSTSILIFTSTVAGLGINCRGSGFCDLTFGSSIGDIQDQIGILVADGQGDRHFDTGAQIACTQGNQGS
ICAFYQSGASGSARDAFGHIQQIIDHGCSLCGSVPTQEGNNVDDGQLTVNYVSDPCCEGNCHC
>FGMG_000675-RA | FPrate:0.604 | OMEGA:Y-257
MKLYQVTAVLAFITTGVIATPSGYDKDNKSPEKHSDDNYPGKKETTNMVPEAKGTATRASWYGYEPKGRI
YKRPCPEDKKKCQKYAYDYSKATYSGVFSEFQKCSKGDNYKVTGKVGACSGYGKVQCLIVQYEDWEKWSD
KIAYLGLYSYKKESPKDKKYLNFNKYCKKNKCVVPIEKVPGYPKFKDNVWVGIDDDQCREDYKKGNKEND
YEYKKGGKGDYDSKKRGNGGDYDDDEVEEYKKGGKSSSRGRYEEVKYLELNIEAKYSKKCAEFCCCA
>FGMG_001677-RA | FPrate:0.604 | OMEGA:Q-372
MLFNSLFYFFLGAVSAWTPQSRVAARANGEQLTERWLPSDKKIRGVNLGSQFIIERWMAEESWKTMGCSA
YNDEWQCVKGIGQAKANAAFKKHWETWITEDDIKQIASLGLNAVRIPVGYWMHEDIIQDGEYWPRGGIWH
LDRIVGWCKDHGIYVLIGLHSGPGISSPNEQFTGHSVPDPGFYTPENYERAYKFLEWMTKRIHTNGNYTT
VGMLEVLNEPVHVPKWKDEAADMIKNYYPNAYKRIQAMEGYLKGKSWGSGDPRTSLPDEDTVFFDAHRYL
SFDNRIAGNKKAYIQTACKDDMGRHVFVGEWSLSVNSTLKNTDEFKVDGQETWYKAYWAAQAESFEKSDG
WFFWSWKCDGKLGKQDWRWCYQSAVAAGVIPKDASSAASLSPCARYV
>FGMG_004545-RA | FPrate:0.604 | OMEGA:C-275
MPLKLTPAKLFATTTLLAAAGYPAYEYRFSNTTFKTTPPHINAAHNKMTVDNSFETLFAVPLSCDGCIKA
VSDSLYKLGGIKNVEGNLKDQLVSVKGTAAPSAIMEAIQATGRDAILRGSGASNSAAVSILETFEDPVDG
LYEEPSRDVRGLARMVQVSSGRTLVDLSIRGVSPGKYRASIRAYGDLKNGATSTGPVWSGEDKKLRGDLG
LVEVGEDGRGASFVDHEFQIWEVIGHAMVLTRQEEKAEPLKNDKDTVVGIIARSAGMWDNDKTVCSCTGK
TLWEERKDEVKKGML
>FGMG_004772-RA | FPrate:0.604 | OMEGA:V-163
MKFIATVLSVLPVVLALPTGEDASISKRQSVNTVTDQLLFSVTLPQFTARRNARDPPTVDWTSDGCTSSP
DNPFGFPFVPACNRHDFGYHNYRAQNRFTVSGKARIDSNFKTDLYFQCQSSSVSGVCRGLADVYYAAVRA
FGGDDATPGKRDEDLVKEYEEKVEVYNKLVEEAQEKGDLPRLD
>FGMG_004920-RA | FPrate:0.604 | OMEGA:S-176
MQLLTALSVLSFLSAAQAQTNVHFGPAFSLGPTKSWIREATTTLVLPRVPGQKDRLAFECGGQPGQWCTW
ASTLQGTQLGNKKVPASPGAKLTIHYKYNDATQKYDQSVAIDGTVVSTLSTATASGHAEGWGTAVECQDA
ACVSTVEAHNYINTVIILNQADPTFSNTLGLNQASSSGLRTPDGGKTWTVATISHKAFNFNFPK
>FGMG_005556-RA | FPrate:0.604 | OMEGA:K-380
MTKLGFVLLAALAGSAAAAPSAPAITQAPEVHAYGKRATSCTFSGSDGASKASKSQASCATIVLDSIAVP
SGVTLDLSKLKDNTKVIFKGTTTWGYKEWKGPLMKISGNKITVEGSGAILNAGGEKYWDGKGGNSGITKP
KFFAAHKLTDSKINNLYVKNTPVQAVSINGVNGLEINKFTLDNKDGDSQGGHNTDAFDIGSSTGVTIDGA
KVYNQDDCVAVNSGKNIIFKNGYCHGGHGLSIGSVGGRDDNVVDNVQFLNSEVANSANGIRVKAFKNHTG
KINKVTYSDITLTKIQKYGILVEQNYDGGDLHGDPTSGLPITNLTLKNIKGKNAVDAKERMLLSSVAREL
ALTGLGPTFKFLVERSTTAARTFPPLLLAKGYSFINFPTPLGGFTTCNMER
>FGMG_006809-RA | FPrate:0.604 | OMEGA:Q-126
MQFSLAFLAAVLSATSVSAAPTEQAVNMMAAAPQWTIESMQRSCAKGDSSCTWNFKIDTHKGAATACKFV
VKGSKASQRNGGPVKCGDYTVTSGWSGQFGPGNGFTTFSVVSSKRQIVWPAYTDKQVQGGKVVKPDQSYA
PANLPN
>FGMG_007028-RA | FPrate:0.604 | OMEGA:S-103
MLNKTFVSVSMLGSALAFSATCKDTAFDPKTNVLSSNCLPRDNSAYLPTELDLNKCFGYSDGELTWEKRN
YSESCNNCRIFQAPDPWFRYNVYWLGCSCEGQSEETTVCIEIVLAHEYVSNDNGVLRC
>FGMG_007529-RA | FPrate:0.604 | OMEGA:N-320
MHSAIFVVFAISGLAAATPKPKPQAECEGLAPLGLDTVKYYVCGKNGFRGYCSEDPCDAEWCRDFAPKTC
DLVFITEPEAPVVGGHKFFQNCSNGFVGCCKSDACTGDAGVCPDTKEAKRGDPTVCPPGTGFFQSCSNGF
RGCCKSDACGQKLPICPPSVTKRSDDPTVCPPGTGFFQSCSNGFRGCCKGDACGQKEPICPSTAAKRSDD
PTVCPPGTGFFQSCSNGFRGCCKTDACSQTQPICPSSSVKRDDTVCPPGTGFFQSCSNGFRGCCKGDACG
NSWCPDFKTGTYQPAQSFKVKTRSDGTCALGTGFFQVCSNGFKGCCKKDACGQKQAICPN
>FGMG_010196-RA | FPrate:0.604 | OMEGA:R-215
MQFTTTVISAILAFTSFTEAAPRNPRSYAEAPSLTAQLRLADTAADFFTLLPDDKDFVFDFNKKQENPGK
GGELIAANRKTFPALVGTGSGMAFGRIDACGMNTLHVHPRSAELQIVTSGRLMTEMVPENGVMDKDGKRR
VIRTELKANMMTPFYQGSVHTQYNPDCEPATFVASFAAEDFGTGQIADEVVALSDDVIAATFGQSIAGED
IDKVRAAIPKSIALGVDECLKKCNIQKRSV
>FGMG_012145-RA | FPrate:0.604 | OMEGA:C-379
MKIALSTWLTVACLFPSTFAFPQLSPEQLEAYRQHAERATEACPFAQKEKRATTFDAKKQRISVSGQHAF
RAPQAGDERGPCPGLNALANHGYLPHNGVADMQTIIQATNEVYGMSLDLGASWLSTAPRFSQNILNGGGI
LGTPSGLSGSHNKYESDASSTRGDLYDSEKTNSHLFYSPFAGVLVSPAGYSFPPRMMANHSNEYPEGYLS
REVFTTFFGVKGDKPGNFKVNQGWERIPENWYRRPIDDEFSINDFLIDVLEHAAKYPRLLNIGGNTGKVN
SFVGVDIGDLTGGVFNTAGLLKPDNLECFAMQIIMAAAPDFIGSQFTDVKKALTPLSDKLRQLLAGKTCP
KLQKYNHKLFAKYPGYTEPYGSYAGVSKCSLKGIIETTKGLLGGLWPTGK
>FGMG_001925-RA | FPrate:0.627 | OMEGA:C-78
MKFSLAAVALLGAVVSALPANEKRQAYIPCSGLYGTSQCCATDVLGVANLDCGNPPSSPTDADNFSAVCA
EIGQRARCCVLPILDQGILCNTPTGVQD
>FGMG_005593-RA | FPrate:0.627 | OMEGA:R-115
MVNFVTSITLLLTAVSTAVALPNTLEKRAVTCRDDRPNSELANANEAAACIDYLASLGNQACVATISGQS
FCRRGDTQITGLARGAPTRTSTCQEVARGAGLILDRCTRGDGKVRGANEAWGNGNLLVDIRRVVQ
>FGMG_006867-RA | FPrate:0.627 | OMEGA:E-100
MKTTLFTSAAAAALTFASGTIANHCSWKPVEGPFLRKWRVVASGVDDIPGKCGGFWDNMNNKNFNGACGA
LSETSCGKDGNGDMAINFFSMSTCNGGHVESAWWEATRNQFGGITCNKEEPFKRV
>FGMG_007249-RA | FPrate:0.627 | OMEGA:C-325
MKAIHATTAYLAILAHQATARRLNWAGEPLKAPNSIFVTWETAHSTGDQIIFAADSEGKSLLNYACDDKI
TLNGVSIQVSADEAGNGDITVGDTRYPLEFEIARSGGVVCEARWNADITAVECEVPWTAGRLDLLGSLPY
NITAECLGRAAEDDLAMVGVVSEEEMQVFAGVTEEEETQPLDPQQLQSRQCWDQAPVVRKKGNGNPKKWR
LHKQITDRINCGKGDCEMSAGKEWSVTHSASFSLEGLGKASWISGGYSVAWTRGNSQTATCAGTKGQTIC
VAHWHDHQEYSVERERWNTCALSPIKDSYYTYSPSTKGSRQSFYCKRSNCKGSGHSGWVKKGNGVW
>FGMG_009653-RA | FPrate:0.627 | OMEGA:Y-454
MKNSCSITLGSMLLLHAGAVLAGPVYGVDDILSPRHSKLRKRAECGPGIGSCNPGSCCSESGFCGTTGDF
CGGSACQLEYSDSCDTFFGPSGSSTESISRPKIGSVPYGSIIKTCTTPGVIALTFDDGPLTYTNDILDLL
DSKNVKATFFVAGNNRAKGHMDDSSNPWPAVMRRMHTAGHHIASHTWTHRNLNTVNSTIRTSEMIYNEMA
FRNLFGWIPTYMRPPYLECNAGSGCLAEMSRLGYHVVDQNVDTKDYENDSPQLIQNSKNRYSAGVSTNSA
SNQYIVLAHDVHDQTVHNLTSYMIDTARSRGYRLVTVGECLGDPRANWYRTASRDRDVTSTSTAAATQTV
PPTKVTSTTKATATGGLVISPNQRCGGDTGYTCQGSAFGSCCSFYGYCGSSASYCGTGCDADFGTCTPPS
GGGVHDTTNGVCGSEVNASCRNYGSKTCCSQYGYCGSSATHCGTGCQKGFGTCT
>FGMG_009958-RA | FPrate:0.627 | OMEGA:Q-211
MHFSTFATILAAVPAALACKGYTGGLPKHTGTKTLSAPQYIARGQTFDAGWVKYDRGVKCTGQAEGGEKD
TVFVLEEGAKLRNVIIGANQREGVYCKGSCTLEFVWFEDVCEDAISIKGGGTANIIGGGAYKAADKIIQH
NGCGHVNIINFYANDYGKVYRSCGNCSGNCRRSVHMEGTTAVNGGELMGINLNYGDKATYSNNCFPKVQC
QGYNGCDKKNGACEPQKVGTC
>FGMG_011671-RA | FPrate:0.627 | OMEGA:L-371
MKSALLTAAALLGSAQAGVHKMKLNKVPLADQLAMNSVEDHLQSLGQKYMGAARPKNAADYAFATNVPSV
EGGHPVPVSNFMNAQYFSEITIGTPPQSFKVVLDTGSSNLWVPSQECGSIACYLHSKYDSSASSTYKKNG
SEFEIHYGSGSLSGFVSNDVVSIGDLKIKDQDFAEATKEPGLAFAFGRFDGILGLGYDRIAVNGMVPPFY
QMVNQKLLDEPVFAFYLDGQEGQSEATFGGVDKSKYTGDLEYIPLRRKAYWEVDLDAIAFGDEVAEQENT
GAILDTGTSLNVLPSALAELLNKEIGAKKGYNGQYTIECDKVSSLPDITFTLAGSNYSLPSTDYILEVQG
SCISTFQGMDFPEPVGPLVILGDAFLRRYYSVYDLGKNAVGLARAK
>FGMG_012046-RA | FPrate:0.627 | OMEGA:N-85
MKITNFTATLLSLGIAADTAAAACCNVKVCDGFNRKGNCMGGCYPYGKTVKINRSGLKSSIGSGQTASDC
FCTFGKNSQSCMLVNSKGQNAPNNCLTGITNLYCQRKK
>FGMG_000087-RA | FPrate:0.652 | OMEGA:N-113
MYTLLTLTTLLSAASALGINCRGSGWCNINSASLDNVLTKAKQLQARGQGDHHWGEGVQIACSGGQWGSI
CAFFQSGASGNTDRAVELIQGILDHGCTQCGSIPTEEGNNVDNGQLTVNYVENPCCDGDCYCPI
>FGMG_003701-RA | FPrate:0.652 | OMEGA:A-210
MLSLAKILVLTSFLFETTLCDRFYYGSGCTGDYKAFSASQYEKCYKTPEGYARSIWSDTSSGVNEWWTAY
RRRQGGAVCGYSVCSFNALNSHCCSASGKFISGLIVHRPGRTQMASKEKTVVEESLVRDPEAATRAFLKL
SPEEQAAAAHTGGPPVGADITGTKWEPKECEEIGGPDAQSYIELPDGTHHGLGAGVLQVSEQELQRQLKA
KGKPALSDKRIAELRENGFLE
>FGMG_005621-RA | FPrate:0.652 | OMEGA:G-210
MFFKTFIPFFAVGASAQLIVGLGSSYAEGPGLDQRIGDLLRQKLADNDGGEWSFTNHALRSLMGPTRIAY
IVSGGNDLSYATCLNDPSNSACQNSISEDEWKQRYKDVLDSVIEHTSGDLTVFCVTYIRALGADTACPSD
DCPMQPDEKEANDNLYNRVVDYTVRAVDEWKAAADNKQHDVRLIPMRQHSEEHYVGTGEPWINGAQVPDG
AGGITWHPNNAGANAVAEFLFQSFTN
>FGMG_005825-RA | FPrate:0.652 | OMEGA:S-450
MCRFHLYLRFHAFASLALVLGHADIDSYSPSVDRDRRFAMVIPATGASPELCKTVMTGLALGGRNLLKVP
GIVDYLEAATRPDAHPSERLDDDDIVLIVDGYDIWFQLPAQVMLERYHRINKEANERLQKEWNQHQKGPM
PMRQTIVAATGKRCDPKNENRGTKMQCDIWPESPLRKDLYGPHTDEDKTCWEFVDPLDTERVGRRHCGAI
RPRWLNGGLYMGPAGDLRRLFRRCFFTLQTGIGRGIKMRSEQSLAYEAVVEQETFRQWQRLNGRPKPGVS
ELMNDKLEYHIGLDYAEELSVQTQWAQDKKGLDHGAFITLGDQELIDRHSESRGISPTRLRGLPDDIKSA
PNPLSALQPRANWTNMPLYADFFTETVSAIVHHNGVASSYSTESKGEAEEPLATVQTPNGRVRYWATSAE
NTSKYPRRMRNSLKQGLGKMKFGEMCRKKSKAGEEPPPEWYDEVFRDNRGSWGG
>FGMG_007284-RA | FPrate:0.652 | OMEGA:Q-90
MQIFTLATLLALMEIASAKLHNQAVCVTNRHYAANGGTPFSVSYNWRVNYEILPDATRCACDYYRNRNTG
NKQWDKCPDCKFDGLVCGSQDWHIGGDEFTYYCEKKCGAQGAEAN
>FGMG_007746-RA | FPrate:0.652 | OMEGA:Q-305
MKASLFMVGASAILASASPIGNVLNERAMKTEWVYEVVTSTKPPQAPKVTQDAVKVVEEKPAPAPVVVKE
EAPKPVVKEEPPKPKVVTVWVDPTPTPKVVKEYTEKVVEKPAEKPVEKPAAPAPVYEAPQPVVEKAKTTI
QKVIKPTPTRAEPKVTVEASIDTSNLSLDGAYDTVMLAYHNIHRSNHSAPALEWDDELAGYAENTANGCV
FEHDMDQGNGGYGQNLASWGATSDIDGLKNKAAAGGITNQWRTPPPSDMNIDLYGHFTQVVWKDSTKVGC
ATVKCPAGTVLSFPSWYTVCNYNPQGNFGGRYGDNVLKPEGAKRVTV
>FGMG_008057-RA | FPrate:0.652 | OMEGA:F-424
MHINIAALAVAATTLLASASALSPQDIPADLPVAQLLTSAQSHLSRGETDEALVYYDAAIARDPTNYLTI
FKRATTYLSLGRTSQATDDFNKVLSLKPGFEGAHLQLARLRAKAGDWEVAKTQYGLAGKPPGSAEVVELE
EAKLAAKLAEMAGKGEKWDECVSHAGTAITVASRSPHLRELRAHCRFELGDVEVGMSDLQHVLHMKPGDT
SPHIVISATSFYALGDMGNGIGQVKKCLQSDPDSKVCKKLHKQEKKVEKAYKKIQGQLGRSQPTTAGRAL
VGTADEPGLVPDVQQQKAAELRPDQKDKVNPILNKAHIALKRSKTKDYYKVLGVEHDADERQIKSAYRKQ
SKIFHPDKAAQQGISKEDAEKKMASINEAYEVLSDPELRARFDNGDDPNSQEAPRNPFQQGNPFGGGGGH
PFMFQQGGGGPNIKFQFGGQQFGF
>FGMG_008249-RA | FPrate:0.652 | OMEGA:R-393
MRAHATLLAMVFGALVPVHAAALTLEHRSPSHGNSVAVPAYWDVYGYLFNVTVGSPPQNLTMLSDMTWMA
LFVRSGRCLGQFNPDLCAGQQQPFFNERDSETFSNASFAQTTWPITAFAPNFTVDYGRDEVCVGNLCNSD
TLMQVSDFPYPASVVPAVPFGGIFGLAPPPSKRAETSEPANYQAWQEGNMGPLVGWHTCATLVSTSSCQG
GDAQLVFGGTDTSIYAPRSNYWSTSLTGMWVKGDGKKSKNFAVPFKAGKGGKKTPPLGVVDEGSEGLGAP
LSLNGYKYLVSKTNAKPASAAVIEKILSQGSTGYNTDQQDWYTLSCDNLDRYPDLIYELDGGKRYTIPPK
DYVTRLENMPGSVCYLNVNVWKYGRTSAGDAKVVLLGRAFLKRQYLVLDFEDRTFGLAPLRMK
>FGMG_008480-RA | FPrate:0.652 | OMEGA:C-48
MQFSIVSLLAIATVAIAAPKAACNNGGLYYSDPKTLEPCKSECVGGTCALFGTCAQDPNVPLLCLAKCTC
>FGMG_008532-RA | FPrate:0.652 | OMEGA:S-436
MKVSGFLATLSLFAGVIAEAIDLPAGVPRSVEEFRAKHPYESPVKRSHRKVVTIRHSKNDRDDISTEFYK
GLKKANNGGTLHLPKGQTFVIGKPLDLTFLNDVHVHLDGEIKFTNDTAYWQKNAFTHPFQNSIMFWKWGG
KSIKIYGKGVLNGNGQRWWNEFAGKEILDKDNAYLRPILFYAQNATGLDIQGIHFKDSPCWTNFVVTSKD
ISFKDVVCTAVSNNATSLPKNTDFFDSLNVEHVKVERAWVDIGDDCFSPKSNATDVHVDTMYCNGTHGQS
IGSLGQYKGEMSFVKDVVIENLWMLNGQHASRLKTWAGPDVGYGFIDNVTFRNFYGGNNEYNAFIDSCYF
NINATTCNQYPSKMNISNILFENFSGYSSGKYGDAVARLTCSSSKDAVCENIKFKNYNIKTPCGGKPVFL
CDGVKDIGVDCVSATSTEGKAALANKCQAPRCFCQPFQG
>FGMG_009155-RA | FPrate:0.652 | OMEGA:Y-180
MKFSLAVLLPVAGVLAAPTPPGIPSDSTARSLLSGLTVSAPTNTDTYNRDLFPHWQTYEGTCNTREFVLK
RDGTNVVTNSACAATSGTWKSPYDGATWTQASDIDIDHMVPLKNAWISGAASWTTAKRTQFANDVTRPQL
WAVTDNVNQSKSDKSPDSWKPPLTSFYCTYAKSWIQVKSYWQLTITSPEKTALGSMLDYC
>FGMG_009468-RA | FPrate:0.652 | OMEGA:V-126
MRFFTAAALLLSSVALAAPAQEQTKDCCCCDISQPAIVCQKNVKPEDCICAAVMCPVNAPTYWPATATAT
STPTPTATVVKRQEDKKPATTDPAKPPCCCCSVADQAIVCEVRPEGADNTCVCPKVMCPVGAPTLTKNVG
AQKTGN
>FGMG_009753-RA | FPrate:0.652 | OMEGA:L-235
MKSFLATALSTLLLVNNVAAAAVEDPIEIFNRQAAGQVIRQCSKPGVLALAYDDGPGQYTNQLIDTLDRA
GAKGTFFWTGKLYGCVYNNQAAVKKAYNSGHQVASHTWTHPQNFGSLSTDQLKQEMQKFEQAMVNIIGKK
PAYMRPPYLATGGNVLPTMQQLGYKVITNDVDSGDWNGQSAQQSQQKFQQAGAGGNGHIPLMHETYASTV
NTLTPWLLNWAKQNNLKIVTVAECLGNAAGAYQPGTFQGNGQNTC
>FGMG_009845-RA | FPrate:0.652 | OMEGA:K-122
MKFSAAILAAAAATGATADAVFNVRDFAASCTPHSAMCSYSFNVIQPGTMDTKGYECTAKLPGAGPGELP
EVKVGTCLPSSRTFDVVRSDKGLTLTVSVQVSPNSFTKGSHLIPTKDIKTVKGDTPTGDAQAYVGPKDFP
LERVD
>FGMG_011375-RA | FPrate:0.652 | OMEGA:C-477
MKFLTAVIGLASAANAHTLFTTLFIDGENQGDGTCVRQPKDASTANSPIYPIDGVAMACGRDGGKAVQYI
CPAPGGAQLTFQFRESPSGHKKGAIAKGHRGPCSVYMKKVDDMFSDSAAGDGWFKVFEDGYSVKDDKWCV
DRLNENKGLLSVNLPTGLPSGYYLVRPEILALHSAPEGDPQFYQSCAQIFIENGPEGPLEIPEKYETSIP
GYVTKKDPAVTFNIYDKHGEYPIHGPDVWNPTSKETGTKKTQKDGLVPKICLAKNANWCGKPLAKYSDQD
GCWAAAKKCWDEVGDCWDNAPPTGGYGCDTWNDYCQEINDACKAKDFQGPPAFTGKEHYVDTPGPIPASY
GKSKAIAIGMTKEIKNSNSNPKPVEVDYEPPSYEVPSKTTKAVKAPAATTEVSLPASNTQSTQETATRTW
NEDEKNTLFTDTPVIAPPLPAVTFPVKVSEDGLCGGENGQTCEGSRFGDCCSREGKCGRKTKQCGCGCQK
VFGLCNEK
>FGMG_011978-RA | FPrate:0.652 | OMEGA:S-178
MTFTLRSVLFAAVMALSAAPASALVGTPFVHSEKPVDIPKTIKPSFEKIARGRDPSKNLGLHKRDYSINI
QDGSASAACPTGNCCSPICKMDVKFDECPGGVKEYPQSCKKNFDDTKAFDRESFTYNCDGWSIFWEDGAV
DGGRFITVEQGDTGNFYQFFVEGCKDTDPSCDPFQCSSLGGGCTAKASGVGTGPKKEQT
>FGMG_012118-RA | FPrate:0.652 | OMEGA:N-116
MQLTNLFCLASVLTSVSAITVSYDPGYGEASRAMTAVSCSDGTNGLITRYGWKTQGQIPKFPYIGGAQAI
AGWNSKSCGTCWKLTYKGKSINVLAIDHTAAGFNISPAAMNALTNNQAVALGRVDATATQVAVSNCGLKK
>FGMG_012119-RA | FPrate:0.652 | OMEGA:E-440
MRISPLAAICTLFSLSSAAPCTDHDAQSSLSFAYMYGFPLYAFGDIARPLLAAGVPLIPNINLASPEPNE
PGAVGVVRPNADTMYSILFMDLSSSDLKVTVPEIPDNRYWVFPFCSPYGDDLVNLGNLGGSKPGDYLVRY
NSKSYGLQTDNVPEGYVGVVNFPMPYGLVNSRIVTDRTDEDVAIVASLQKASALDLSMFVQPEYTAQNQS
LYQAVMNTAAALTPHLPPYVVSDRKSVAKDLKKAGFKDGKFIQPAGTNLTAAVNTANLTSKSFASRPDVS
KDVGNGWSLIADRYIGKFDSYYNMRYQIGLTAYLALAQSECAYPSYGSFDETISVKEGESIIWTFTAPPK
IREGGFWSLTAYGPNQDLIPNDQEKYMVGDRSNLTFPDGSSIADGGEGPFQVLLQDSSIAPPSNWTNNWL
PITPGGGDISVTIRWYGAEEEMVNGTYVHPKMSLVDAIKQ
>FGMG_012380-RA | FPrate:0.652 | OMEGA:D-363
MKTSIAIISASVASVMASPFPISAKQCNVVPSAAVNGNVHPFHNGKADTAVDWAHQPSCLLFEVPAAKVP
ARNDGLHVFDKECAADRVPTSAPTTAQPWGTVPKKVLVRRATQCNCAATGSADNSVQPFKTTTAATAKDC
QALAEADTSCLSFLYGLSGDSKSPVCKLYKVAASKIPARSDSLFIFDKGCSSKQVPTTAPTEDAPRGLVS
VCVKVTKGDSKNEYQDTKTEASKNDEHKEAVKPKSTKVDKSEKNKVQYAVPEVTEHDESPKLKPTKTVIS
KPKATKVAKVEDTRAKGEDNKQAEATKVQGQQHQTTKIAEVENNKDNKGQGNNNKDAKVESPKTLVTKVR
NNEQQATQAAKADGKKSECKTTKTSNAQPKVTQAY
>FGMG_000617-RA | FPrate:0.675 | OMEGA:K-190
MLRALFLASLAMISSGYPWAVSPQDDIEIGVRHINEARRAAGLHELAWDTSLAQSAQSWADKLAEGEVPH
GYSLAQYPVSGEAIYEEETATDCVGQSFEATLQSAVGNWLHKWEAEPGGETKTNHDACMASTAEYVGCGK
AFNTHSDDGEKKCKFYDVCFFGHGLRTPPKPKTSWAHHWGHPIYVPTPFKFTPIEGSEDSEEDAKLEFSG
SED
>FGMG_000844-RA | FPrate:0.675 | OMEGA:H-111
MADIVNPGLFVWVFYLGAHIAADVMCGVSSVGFPATKPQPLNITNKVAAIVLMGDPSTTKGQAFHVGSSK
GDGIFSRQKPNGCRYVSGKTMSFCDAGDPFCEAGGHDLSTHMRYVSAYGQTATDFAVSMFHLA
>FGMG_002104-RA | FPrate:0.675 | OMEGA:S-370
MRAEFLSLLALNAVSVLAAPKPSTVGASAAEATQLEEIADLAAAAYKTAQKTKAAGTCDWSKVRVRREWN
TLSKNDKKAYIKAVKCLQSKPAKGPADFAAGAKTRFDDFVSTHIDATQTIHYTGNFLSYHRYYTWLYEEA
LRNECGYKGTQPYWDWSLTAISGLKKSPLFDGSDTSLSGDGASTGENPDIVLGASSGLPPVYLKTGNGGG
CVTSGPFKDMSVNLGPAALDLPGGKVEANPDPLAYNPRCLKRDLSDSVNRRFANATSVLNNIVNPKNVFD
FQMQMQGVPGTGDIGIHGGGHYALGGDPGRDVYTSPGDPAFYFHHSMIDRVWWIWQMLDTKNRVNGKDAL
AGTNTFLNMPPSADTTFEDSIHLPWLGPDKQIKDLMSTQSGPFCYVYL
>FGMG_002478-RA | FPrate:0.675 | OMEGA:C-323
MAAFFKIALCASLLCIQASAAVDRTNAVISVLEQHKDLTSFYQLFTSTGHGSGIPEPAFEARFNDNNKDD
EFTILAPTNEAIAKVPGLAQKLTSPAGYPLLAALLRTHILPGKLSPQQLHGKSIRAIEGFSIDISASGVI
TTNTNMMSLTDSDVRAGMQAKLLRDRRGNLIRIPATNGVVYVVDNIFDPMITYFGEDAPDNESLPAIKRS
PSKTMKDILAADPDTLRARELLRMHAPRFLYDRLNTKLAGKDNSKVVFLVPSNEALKLFTKKAEEQSNAD
ITKFFLAAGYGTMDGKNIKGRAGFTLEVEGGRVMNAKVEKRECGSNGCIWRIGRVIDSVYGLL
>FGMG_003574-RA | FPrate:0.675 | OMEGA:L-211
MPSIFTQRTMVFVLVLFLIVFLYDTYGPETDYSNIDVELDQDTLVASREDCICDDEPIDGFGKTYFPRSE
FVGSSGGIITGWPARGGYYQLKCSLAELDYLGLDRFNPTNRTGDSKEEEVWCARLRQLGAKWYPNIYHIL
AEGGNGIEIPRLYLGWPADGGGVWALQSTKFNANLRGLGRIDNAFTMEERWQKIKEYGGTFYADPKDCPY
LDLDGSKEPDSKEIDQNPLYG
>FGMG_003740-RA | FPrate:0.675 | OMEGA:N-163
MLFTNAIAAIALSVSVNAMPQPYPNKCGDQVCPADKAKCCEVIVNGVAELGCFAECPPIQALQRRQPYPN
KCGDQVCPADKPKCCEVIVNGVAELGCFAECPAPPSGEVHLGRRDESMTTIAASPPVATFGPKCGDSFSV
PSARSAALMHSTNVPILTRSANNAPSSRFPDVGVLCTKAQMTNQALITVASK
>FGMG_004039-RA | FPrate:0.675 | OMEGA:I-274
MYSWIPLLATFAPQALASCAYGTHLHRRADAIQAPKFGYSAANGPANWYNLDPEANKLCATGTHQSPINL
SNGTHNVLSGSDLQIEIPDFHDGAEFENLGSTVEVVTEGMGGKLTLDNTVYHLKQFHFHLPSEHLDNGTS
MAMEMHMVHQSEDKKLAVIGLYIDLDDGLPNATYKAKAAAREATGKDCKTTQAQRSTVATTVLNSVDKIA
TLGQTTHTKPLKMSEIVSLLEAGEFQSYSGSLTTPPCSEGVTWLVSTQKVSIPTKTYLKARSVIGYNARF
PRTPWRGECFEYAC
>FGMG_004520-RA | FPrate:0.675 | OMEGA:C-449
MKSLALLLLATVVYADGLVARRRGAEFNIHVRHENGASHQPEMLSKRVSCGKGAGSCPKGQCCSESGQCG
TTSAYCTSPECQMAYSNGNCDGSKKPKGETTANIPRSTTGNGPYNKYIITCTTPGIVALTFDDGPYKYTN
QVLDILKKHNIKATFFITGNNLGKGQIDDHSKPWPKILRRMHFEGHQLASHSWSHQDLSAASNELRKQQI
IYNEMAFRNVLGFFPKYLRPPYGTCSRDSGCLDYVTKLGYHVVNWNIDTKDYLNDSPSKIQTSKNTFSDS
VSTDSKLNSYIELSHDIHEQTAYNLTKFMIKTLKAKGYRAVPVGECLGDARENWYVDAKGTKSGRSFQGR
GSYDPPLTSPATTKDGTCGAKNGLKCTGSKRGNCCSYYNFCGSTSGYCDGGCQSKYGECNKIKPDSKLIV
SDNGLCGEKYHQTCTGSRYGNCCSKYGNCGKTSEYCGSGCQSGFGTCPYS
>FGMG_005052-RA | FPrate:0.675 | OMEGA:N-70
MKVSMIIALPFLVLASAAPAKLDERQPVDVSKVVSKVESIVKCEAKIARSIHVCFPDIVAGDPVGLTEIN
TCLAKLSKSSDRALRLESVPCIY
>FGMG_005120-RA | FPrate:0.675 | OMEGA:D-209
MRLTYVFWVLFTALVYNQRSSTTTRGLFCTPQKPQRPSGLLPHVQLPLCRNERGHPEKPCFIAITLGDMI
VTYPIFAKAGEHPHILRHEHMRYQSVTVPMYTKVGVSPLVVAVFCSSRLRTGDIARVSIDDIRLEKGEGE
LSSWAFYMPREKYQYWLRDNYWIEFQEQDAKWYANSYSPEWPVNCREETFDGWECVVAGGDYRRQDLWDE
GYGDYWPLNEQPGRGVTDI
>FGMG_005363-RA | FPrate:0.675 | OMEGA:N-201
MKVSIQIVTVALAASAAAHPQNGRKPAPSSTTSGSATSSTAVPSKEQVHQSLQRLLDLQIERPVAMRLRL
RNMYQIRCLCFPSGGSATSSKPPPPPSATGSKTASGTMSRPPRPTSLKQWWGQEQGRRKCRYDHWACISN
KSNDKADCDDKRASCFASAKTATATTGPTSIPTGSATTTATDSTSATSSTTVADAVAATANADGSLSPDD
PSFDDDSDDST
>FGMG_005371-RA | FPrate:0.675 | OMEGA:Q-275
MSIRSISSQLLVSTLALSSLCLGQKTGKFNFLTYNVAGLPEIINGNDVPGDKKTNSNLIGTAFATQGFDI
VHMQEDFNYHAYIYATDNHPQRTPTSGGVPFGDGLNTVANYPWSTFSRKKWNKCNLNSGDCLTPKGFSFM
RIAIGGVEVDLYNLHADAGSDQGDVDARSAGIDQVLAYINSNSNGRAVIIGGDTNDRWTNAGRSLNKLTD
AGFSDAWVQLIQGGKYPTAGAAADPCKVPAADNKCEIVDKVFYRSGSSVKLSATSFNYVPKLFLQPDGNI
LSDHNPVLVDFTYSS
>FGMG_006852-RA | FPrate:0.675 | OMEGA:E-71
MKISIVLFITAAMNGAMAQFQYTACGYHLVNGGSYVQADIAWAACGRTDTCEGKEWNTLFIYRPIPHGLP
EMESLGFCSNGCQEDNFHDRCN
>FGMG_007014-RA | FPrate:0.675 | OMEGA:G-328
MRFPSSIVLALATLTAAHPGEDHHDELQQRRSFETTAERLSLRHCAEKLKARGVTDRNIKRRSALIQEHR
QKRGIKKRDLEDVLNTDHNKTDLELVCSDPEVTIGPYYVSGETIRRNLKEDQEGVDLILDYQIINVETCE
PVPELYLDIWHCNSTGVYAGVNNQGNGNINDKTNINNTFGRGIQQTDEDGVAQFETLFPGHYTGRTTHIH
LLAHANATLFENKTLGNDIYSSHIGQTYFDQDLIHEVESLAPYNTNTQVLMTNARDYILAEAANQDYDPV
VEWTLLGDTVADGIFGWLAYGVNITETNKVTPAVFRYEDGGHTNPDFGMGGGPGGPPRSDEDAENNAA
>FGMG_007530-RA | FPrate:0.675 | OMEGA:G-367
YRLVPSLIVFSIPIRIYIMVAFKSLLVLLALSVEGIAALNPTSTCSTALGTKSVKNVPTSRATTVKKITV
IKKVVRKVNVVVIPVAKTSTIRETKIHTSTIIADQATKTATSTIVSSSTSFIQRTVWSTVNTATTTTTTK
FFTSTVGEPADFTKVLNQPRTVKRRNQEKRGDIETETVGPGGTYPQSVQCVKEVPTTSTKTVTTTVQGTR
QTAKAVTKLKTTTVFTTVLTTLYPDDASTTVLTTEYPVTTSVVDVTSTTTVVSTVTVESQVPEATEYAIC
SSDNLMVTDNGGGHFVTYGNYQLQSSVISVGGSYTASLCCNACAKLANCQGSYYTSDTQCKLYIARDGST
CADSRQNMIAEYYTANGFPLSVILSNGLCGQWKNGGTVGSQNT
>FGMG_008271-RA | FPrate:0.675 | OMEGA:E-449
MPHSLRAIAAAALPSIVLASVIQQPIDSFDHTQGYQFDPLLHLPGISPYFDAVGFGLSHAAPEGCTVTSA
SYLIRHAAIYANDAEYEDYIQPFLYKLEKHRGDFSGPLEFLNKWYSPIEENHLEDVTPSGKKDAKKVGNH
LFKRYKHLASSVKRVIADTKSRTYDTAKAFLQAFPEDGNIEITRFDKKELNNGTRALLPHKACSKFSKSP
GTDEQNEFVKNYATSVSQRLRPYTPDDYELAPKDVFALQSICGYESAIKGEKSPICGLFSDAEWLSYEYA
WDMKYAHMVGPFNPLSNYLGFPWLHSQSKLFDNIDKNSDLIDDESLGSGWPKEQRLFFYFTHREVPPFVA
TALGIFNSSSHEGYDEFPTTHVNHVRAWKMSDLIPFLGHVGMEKMTCKRPDTKDGSGDGEEFIRFIANTA
PRPLPLCQNGPGASCPFKEFKKIVAAGMEKYGDFDGVCENKKEEKEDEL
>FGMG_008287-RA | FPrate:0.675 | OMEGA:D-323
RNYFAMFRNTVLTLLVAAGATQSQAAFTLKKTYDSSNFLDSFNFRDRAYFDSIDPGYEGDPTGGSVNYLS
RSQAVSSGIVSTNNGKILLGVNSVDKAPLLTPGGSKHGRGSVRLESKESYSSGILIADIEHMPGVACGVW
PAYWSYNFDEDPVGEIDIIEGINANQNGNYVSLHTCGACIFNRPGGLEPRNNCNIGGSDTRYCSDGVNYS
GCGNTMPSGSYGKSFNANKGGIYATWLTTEAVKIWWFPRNSIPADIKNGKPEPNTWGQPATTQFVNANGN
CDVGKYFKKQTIIFNTAFCGSNIDQGIWNQECRASTGYATCDDYVTNQPAAFKEAYWTINSLKLYQ
>FGMG_008351-RA | FPrate:0.675 | OMEGA:G-81
MVRLTVFATIMAAATSVQGAIWCQCLFPDKSHCCVASGAGSCQEKCENAKKPIIDGSVIPHNQPCNAGGA
GFGISPITAQGALRATPESPKFGFDRSYFTRSAPIF
>FGMG_008377-RA | FPrate:0.675 | OMEGA:R-154
MQFKLVSIIALAGFAAAAPSSTQDFKNLPDGPYSGINNADGSSSVTHMETGETFNFAAPAKRSLEKRDTH
CWGYELDHGGVDAAVVQLKNWAGTGRNWKSDGTPSYFGYNERGVYVYYCINAPRSQGNLDVADINYALGQ
MDSKCKRYEAGYFRWDGSVEIVGKTRSGDNICLG
>FGMG_008596-RA | FPrate:0.675 | OMEGA:E-394
MRFSTPLVAGLVVVSPAAAAPKYGDKELFKTVKPIKQIELGPRPYYLVNDMDEGSLKKKLQSCSEKPQKS
SEWSIAHRGGATLQIPEHSLESNLAGARMGAGILECDVAFTKDRELVCRHSQCDLHYTTNIVTIPELNKK
CTQPFKPAKDGKPASAKCCTSDITLKEYKTLCAKMEGFNATATNAADFLKGTPGWRTDLYSTCGTVLSHK
EHLQLVKRLGLKHTPELKTPEVKMPFQGDYTQKMYAQQLIDEHKEAGVKPSDVYLQSFLYDDILYWLDAE
PEFARQAMYLDETGDTPETFKTAVANLTRYVQDGVRYIAPPLPYLVQPGKDGKIVPSAYAKKAKELGLKI
VTWSLERSPPLKNAATNGDYYYSTIAKIVNNDGDVFKLLDVFREIGVVGVFSDWSATVTYYANCFGIKL
>FGMG_009838-RA | FPrate:0.675 | OMEGA:S-132
MKFSALAAAAAVFGSAAAANKAVVINDCDTAIYVQSVPFNGGAPGPLTTLKPGQRFSEDLRTSGSTIKIA
DTRTLNKPLFFGYSSDANNVYYELNTQYGNPFASQHNILNPGDGCQKFDCKAGDAKCYSTPSSKKNYSCP
NPVTLYAKICAK
>FGMG_012235-RA | FPrate:0.675 | OMEGA:D-350
MHFLGLIVAFAPAALAQSAIWGQCGGTGWSGSTTCQSGLKCEKINDFYYQCIPGSDNGGGTPPDPGTPSP
GNGNADATGLDAKIRAKGKIYFGTEIDHYHLSNNPLINIVKKDFGQVTNENSMKWDAIEPSRGQFTFSNA
DKVVDFAQANGKKIRGHTLLWHSQLPQWVKDIRDRATMTSVIENHVKTMVTRYKGKILHWDVVNEIFAED
GNMRNSEFYQVLGEDFVGIAFRAARAADPAAKLYINDYNLDIANYAKVTRGMVDHVNKWVSQGIPIDGIG
SQAHLAKPGGWNPASGFPAALKVLAGANVKEVAITELDIDGAAANDYVTVVNSCLTTSKCVGITVWGVSD
KDSWRSETNPLLFDRNYQPKAAYTAVSNALN
>FGMG_000013-RA | FPrate:0.698 | OMEGA:D-96
MRPSTFFTLALPTALAFDQKCDFRPVNGGNMPGQNAKRWTITGKNIGDEVAGDAFCNGIKDNLKCLNVDW
NCKSDGNRGLKLSFVTSDWCGGEKIDEAWWFATKNGFGPLCCKGGC
>FGMG_002521-RA | FPrate:0.698 | OMEGA:K-263
MVLLKSFLLIAILALSQFATASPAQQCQKESCKKAKCQTSRGVKGPIPRTHQISSNFLADYGGKPVPYAR
PLKPRADFLVGEDSRKKWNSQEYPFNIIKEIRFGTKVCTGTVVGPRHLMTARHCVPKKIVPAKIKYGKDR
LSHATDVITVIPEQEICRETDDFAILIFDKPVFEKDGYFGARSFNCKNRNKPIYKHAGYPLIDKKIHRLR
QDHIKVTACNVCDQALQIATDTDVNGGQSGGPLYNMDDGGAWFYGVLSGYHSKIGSIFTSGPNFVNAIAY
ARDKYR
>FGMG_003646-RA | FPrate:0.698 | OMEGA:S-265
MRFALLCSIALGANTAIASVCKPRQSSDTSVVVAEATTATASESSSPTSTKLETTGDTTSATTIATSYVA
VTTTTEFSTSAATSIFEDTATADSVTTDLSSASTETTTLPETTTTATPPLETFQIIAPEHNFQDKYLIGR
KTASQVMGFDLEPQPNIPTLTFTIETETSFVHEIDGMYLCIEYASPSSPGQLQLCNKDSLGNGRWSLLTC
EKTDERGLECSVPAASCGFNMNTGQVVCNDLEGIFTQFYLVGNGNQNGFTLALGSREHPPSSDYYTAVEV
EVTSVRGEL
>FGMG_003709-RA | FPrate:0.698 | OMEGA:K-238
MMFKNTLLALAATIGFSDALGINCRGSGLCSGNKGALGQLIAQVRAIDPSKRFSNGEHVSCVDINNIGNH
PAICAFYQGIGDRTFSLSETQTFLQQIVDHGCKLCGSVPTDPGNNVNNGQLTVNVVLNPTKRDAPQSPAV
YEKRGDNLLVRRLGINCRGSSSCGVGGIGHLPNGDLKDVRDAVASGEEGNFGNGDHVACIPFAFGQLCAF
YQGIGSRTFTKEQSVTFLDQLRQHGCSKCGSIPVDPGNDVKNGQLTVNYVA
>FGMG_003903-RA | FPrate:0.698 | OMEGA:D-211
MWNTAFLASLFLIPLATGAPAIRIEERQAPCQNVHIFLARGTDEPYPGRQSSVVSAICSGLPSCDYENIN
YPAGFNTYCSSIYAGITGGLSQITTYANRCPNSKIVLSGYSQGAQLFGDILGGGGGQSLGCTQPSNPALN
PANSPGNKIAAALFFGDPGYVANQAYNTGTGASRSGINPRNGAQLTSLNLFSSVLRSWCLAGDTVCAQGT
DPTAHTSYFNVFSQEAGVWVKTKV
>FGMG_004981-RA | FPrate:0.698 | OMEGA:S-462
MKRITVPLILLAGFGGRAECRKSATMVQSFDDIKPSAELVWIPCFDNFTCSRLKVPLDYSNPDLGTAPIA
FMKLAGKNATSDSQSIVIIPGKTPREYKDQVGLMFGETYNFVGLDPRGIERSGPKIDCFRNKEARKAFNR
AHYTGATNTSTNSFEEQYYSAEIYGDLCNEEVKTKSPYGYYVTSPAVARDILTFIEADAKLAGHEPSEAK
LWGFGNSYASVIGTTFASMFPDRVERLILESVLDVDQYYENNWRSNFIDSDKAFEQFSVRCHAAGPDLCA
FWGPTPENITARIDTLIRDISSHPIPVSGIGGHTLPGLATYSDLKSLIAYGIYEPRTYFPIFADIFAELE
SGNASALIGWSEKLYLASDVDVIIRCADSYRNNKLVTLEDWKDYIEDSVSRSKYIGDVFPIWARTILCRS
LKPRLPDSMMLQGPVTGINKPMSFPILFTSNTLDPVAPAANSHKMALRFPGSVVLLQESVGVSSKHVPGH
ALS
>FGMG_005135-RA | FPrate:0.698 | OMEGA:D-177
MPSLINTFAALASLLAISSAAPTIVPRATECPSTGKARLQPSALYNIFPSAPNVAKKTSGFHVETYNNAS
QVEQLLVFKDLPADAKDCSIGWAQGERPERTFIVKGGDALTEIKQLSGFPDTKSITYETAKKFETADKTA
GAADFTNWDDLPAQGHIIGAIDCKSSIYLKAALRNPDGNTKVYLEQNSKNGLYIEYSC
>FGMG_005277-RA | FPrate:0.698 | OMEGA:S-441
MHSVIAFVVLALSGTAYRVTGSACKPRSSSTIPTLASSITESTSTTTPTTNAALPKVRNIAVNGNMAEVD
PSDPLNVPDWDVINDAKIVGGQGREEPGSTERGACAMSAKNTKLERRAVGSGVSMSQTMGDLEIGTTYTV
RFYYRVVMSQGVTDCQLSAKFGNSLLTEDSISSSDVSDTWTEVLKTAGAEESSAALNIQMECQGGSATIL
LDSVFVSNKVTPDTIDQFVVDFGNNGSGDNPPLVEDPQTTAFIEPTTTESGLAAGTTTTAAESPFCSKAL
NGGCWWKGSSSGCESRGSWPGPGGQGRLVPRPDNYPEPLSQLWCVGWCSLSPGCRSAAYNPVDRSCRFSE
FAVQDSNFVLGPDVNVDTEGVYYWHDLSCFNCPCNDSDETDVEPVVTKTTTKSSQPTSPSGPAVKLPPAS
TCPKSLNDGCTWNEASRGAVSSPVSTEAGGQAPMVLDMPLRNQETTPWR
>FGMG_005333-RA | FPrate:0.698 | OMEGA:G-237
MQNKLFTAAALLGAMASVHASPVTKQGKRDVLTALPQGADEIEFKFQPSLDFDSDGCYQTAAIDPDGNLN
PGHGATGTPQGDCRDPPQLENSNTYSRKRCNNGICAIMYETYYEKDQSALGTFAGGHRHDWENIVVFAKD
DTVLRVAPSCHGGYGGASNEFPIDGTSPLLVYHKDGAGTHCYRFANDDDRNNPENPTGSFFKAPLVGWDN
WPDVGLRDKMLQNWSGGVGPKLDDEFGDSLKDAAGDGVEGFDPYVDE
>FGMG_005735-RA | FPrate:0.698 | OMEGA:D-468
MKFSFTAAALLAVSPLTEATKPPVTAKKLQKLITEKGLMKNLETLNKIAYANGGNRAFGLPGYAASVDFI
YKEISKLKGFKTWKQDFPANFTQTLAAEVTVDDETFRTVALTYTPSTSEEGVTAELIHAPEGEDACDVAN
YEGLDVKGKIVLVERGLCPDQTTFAGKVKPAAAAGAAVVVIYNSDEAKLTAGTLSAISPDYVPTALIDQA
PGKALKAKLEAGETIEAFAKIIQTIETRITQNVFAETKAGDGENVVMLGAHLDSVQAGPGINDDGSGTTL
ILETAKALQHFSTNLKVRFGWWGAEENGLVGSRYYVNNMKKDEVDNLLAYVNFDMVSRGFFGVFDGTGEK
AGPGGPPGSDVIENLFREYFEAEDIEVTPVGLTGGTDYVAFREVIKKPVGGLFTGTGLEQDACYHQACDN
ITNPVPETLHTNAHAAAHVLSKLAIDGVELLSKPPANTTVGFIKRVRDEASLHFHEVNNAEGKPCDHDII
>FGMG_006538-RA | FPrate:0.698 | OMEGA:R-439
MQLKGVMVALLSMSVIADAAVVQRRHPLARALQRRQFGGGGGGNNGGNNGGNNGGNNGGNNGGNNGGNNG
GNNGGNGGNNGGGGGNTLQANAVQTGSQQDGNQPGSDEQAASATDDNNFINFCAGQTLTNGEQNRDGSCN
GIPMGKIPAANKMVSSVFTSPQNGDNIQANQNFDISVQFINFAPGSFTNATNTYYSAPQDLDGGGNIIGH
THVTVQDTGNDLNPKQPLDPSVFAFFKGINDAGNGQGLLTASVEGGLPDGNYRICSMSAASNHQPVLMPV
AQRGAQDDCIRITVGGNGGGGGGNNGGNNGGNNGGGGGGQGGQGGDQNNGQGGDQGGQGGDQNAGQGGDQ
NGGQGGDQNADQNAGDQGGDQNAGQGGDQNAGDQGGDQNAGQGGDQNAGDQGGDQNAGQGGDQNGGQGGQ
GGQGGQGGQGGFGGGRFGRGGRGRFGGFNAASTDGAANSTTTDA
>FGMG_006870-RA | FPrate:0.698 | OMEGA:L-461
MKSSTTFLALVAAVHASPISKRDQPFDTKESLCKDKAWQLDTVEGASNVWETTEHETNWLFNLEHAINNG
SGNLGMSGCGLIASTECLPQGAESCEEHFDKYGTSGDPLKDPIGRTSYWIFQAIKGMHSKFQMLHSELVE
QTIITNLQIGEMVADFQGAEDKTEDVLKWLSAAVGLGSTIGGLVPGGAGEAMSTGFDIMGGVFDIIADET
KPEEIDQGTISAALGAIFQRSSEQLKKTMRLATGTLEKGETADAFNSLPASKKYGPWIHSPITRFFNGGW
FLLSDRAEPVQNLIKSISGNIKPKIANNVMKAANLRLVADKRVGSQEDCGYATGRQWMNFKDSEFYCFYI
ARLDEHDILAIRDNAGIKKSNDKTSGASVARDFNNALTGTLGFEAMRFTANYARIAKAELQSCEYDDLMV
AAKDAGKLLPESFNPATDEWPTDAEIINKNIEEKLKDFDKLAGGFKKFVENARAAMTVANRQQ
>FGMG_007108-RA | FPrate:0.698 | OMEGA:D-299
MFYQHSLLYAVLSMSAAEWSQNGSPDYSGLSMQYKVRALHQLQQALLDSQDSEGNLLTCVLLSSLEIAHG
SSMWLHHLQGALALLESFGASIDSDVAEFVLLYFRFRYILMETTQPTHDDTVSQAMASLIRIEASLSNDR
NLVDEQIGCSMELVDIINEISSLAYISKDQLYTKGQEIEQRIEEPLQDSADYYLSRSAESFRIAAQIYLR
FVCYDTSITHPSILELHEQLLLCLSSIIVKGQTRRSFPMWPLFLAGCACSSDQQRKVVLDHFILLDSKWP
ISNISAVWNALKLIWHTRDLQSTNQDWRKVIRKFGWKLSLS
>FGMG_007244-RA | FPrate:0.698 | OMEGA:S-113
MHFISVVIQTLLAIGVTVARNEKFRRGVKPNGPIDPGITSKCTYYDEWMDNGYTNCQKWLMDWAITEQKF
SEYNPTVGDDCSGIKVGHSYCVEINHGLPEEPDKPEVASTDISGSETTDTKEPHILTQEGLIES
>FGMG_008242-RA | FPrate:0.698 | OMEGA:Q-121
MKFSAATLLAAAASVSAATAVFEVKDFTASCIAHSTFCDYEFKVIQPHSMETWEHAVVCNARAQSTDYTL
PDIKDGKCKDSSRTFTVTRGDKGLLVKISQPVSPKSNTVGEHFIPNSLLFQSEVPNAEVQMYNGPKDFEF
TQSS
>FGMG_010747-RA | FPrate:0.698 | OMEGA:D-355
MTSLVPSRPFVLLLFLVCVAALLSRQPYFDRSHAHRITYADIRATQILPRLNFSRSHHEFYASEAARSLC
DAHGYSVFKPRSDALDGRRKIYDLFMVNTELDFLEIRLKTLYNYVDYFVIVEAPLTFQGGPKNLTIHDNW
KRFEAYHDKMIYHQLQYPKGFKPLRHWDREDLQRNAMFEQVFPKLTGEQTPAWGDVILVADVDEVPRPAT
MLVLRTCNFPRRLTLSSKFYYYSFQFLHDGPEWPFPQATYYQGMRKTILPGNLRTGDAGIPLLRDLEKGV
LSNAGWHCSSCFATVDQFLNKMASFSHAWMNRDSFRDRDRIANAVRQGVDLWGRKVDTFTRVDNNLDLPR
CLLEDRERFRYILDRDGETAGFTDYP
>FGMG_011264-RA | FPrate:0.698 | OMEGA:E-252
MAFQSINSSKASFWLTLLLPALGISAHGHVDEIIVNGVSYQGYGSTDFPYMQDPPVVAGWTIEQADNGFV
SPDKYDDPDIICHRDATPAKGHIELAAGDTLTLRWSGWPENHSGPILNYLANCNGPCERVDKTKLEFFKI
DGLGLLEQGTPGRYADKVLQDNGDRWNVRIPKNIAPGNYVLRHEIIALHNALDKGGAQNYPQCFNLKITG
DGSDSPSGYLGTELYDAADPGILVNVYSSSVDYEVPGPTICEGGVSSVEQKPSEATTTAKCTTRY
>FGMG_011985-RA | FPrate:0.698 | OMEGA:N-262
MRCSTLYSLLIFLGIIVCLAQSTPCIKNTASPNEYKKKKKGGKKDKRCLRQEAWHHEVHYHHGGHYIING
TVIEPDGESFKPGGLHGDGKKYKYYKIVKDPKKIDKYYKDKKEKLKKESPDRKITHIHNDYLLPSKKIDG
RPKVDTPSKEIDKRPEDDMPSKKIDRPEAEIPFEKFNPPGKHNPYATFDRPEGDNPYASWKARQNKRAVD
TKKKRGVMESKAFIGNRHGQEWPYPWNTDEANAIKKVNVTIEQNGVDPIAINVIIRNNSKMNVTVVTRNS
PSTKTPSS
>FGMG_001856-RA | FPrate:0.720 | OMEGA:Q-92
MKFLVVTFLALATGAFALPGGGPPPPPPPPPKPTKPAKPPTNKQQISCGNGQSLYCCTNEGGNDVTCASF
SNGGIGGVCNGMQVCCNNNGTQGCNVGNGGGSITFTQNFPGGSWRF
>FGMG_002321-RA | FPrate:0.720 | OMEGA:G-170
MNPNPLALLILLVAFALVDAYYTLTVFAPKLPQIHARVINARNRAFIIGASQPSTFCGLDNATECPDGTS
TQVNENMTGLAAAVPGGQFIFVAPDGMISYPSPHSALRPPGSQMGGFRPAHVVSDCKMPVTILMWSPDNG
SPGLWACPTARNVPVSKEAVLKATTGLFKGKGCLKVEGVEIQTAGDKFAAWAYT
>FGMG_003112-RA | FPrate:0.720 | OMEGA:D-350
MRTSTLLTIANSGTAFAAVQMYNQCGGSAYSGDKECPSGSTCVEASKWYSQCIPDSSSKKASSVEKTDFD
FPAFGFPGFPAPPQAPPAEEDNSQGNDNTPAPFLSTIPTPEGPTNTPEQPVDDPVDTIIANPTTAPTSEP
IETGSGSGSVAITRTIPASSGATAVATAIPVSGELDGGMAYYDRSPSVCKEQEEAGEADAMFILGDGATL
RNVIIGPGQAEGVHCKGTCTLENVWFEDVCEDAITLKQKSGTSIIRRGGAFHAADKVVQFNGRGTVEISD
FYVEDYGKLVRSCGNCKDNGGPRNVVIENVAAVNGGVLCGINTNYGDTCTISNACQDKGKNCDLFEGNSD
GSEPTKLSSGPDGTSCKVDSFAETC
>FGMG_004776-RA | FPrate:0.720 | OMEGA:D-244
MRFVSLCTIGAALLPMANAAPCKPSNPTSVLSATTTADSETFTTATATETDFHSTVTSDATSVLETTITE
TATWSETTTFVSDFTTEYSATTDATSIEDFTTTITEIPEPTNLIRNGGFEDAKNVDWDTRTGGIESDPDK
ANSGDKYATFELVNADGSGGNTLNQTINGLDTDRRYRLAFSAAIFDDPAIILGESTCVIEALQKQTVIDS
WPLNFAGLNEYKPYDVTFSLIDEDLSLSLRLRCDGRNKVTLSVGIDDVSLYDAGPVPDQVVTITE
>FGMG_004958-RA | FPrate:0.720 | OMEGA:S-210
MLFKSIFISSLATSALAIYLPEDHYLVRDNAAAPGVKCDCSGDNSSPNQASLGTFVTGYDRFGGLSPNSF
LGKWYNSTEGPDGREAGWIYPEKYGFELDEEKLPIKANVDLMPGTLVDRFGYNTGKSLHLPCHRSLLPES
SPPQNLDNDVNKQFPNNYHVYNVSRMFTVQAGPIRPWFGQPGFGVQFFLGNGISVKDYLDNGHLVELKPS
DLLKDGTGCGFAREGDDSVSDEL
>FGMG_005115-RA | FPrate:0.720 | OMEGA:K-162
MYFSAILMTLAATASAVDVRAYSNSGCDGGWVGCAGINPGVCCVFSNSASSGRLSVSVNAIPSSWRIRGE
ANTGGGCTYLANQQDSNGNTDICMTYSSRGDRTGGSYSFVGRKRAADNSCPAEQPDGGKCEAGVKPDLLG
LSDGTVYSIADLSEEKVEELEKIANTGAGADAVPAEFEPLRR
>FGMG_005859-RA | FPrate:0.720 | OMEGA:W-361
MSVARFASALLASSVMGLASADVLDLPIFVKDGYKMVEFGVGTPAQTARLLFDTGSASAWMVDAECAETC
AHVNKGHRFGYNLTASSTGKKTGHDANIEYLGGTIIGPTVEDKFEAGGLKWDSKFIAANESTWSSLAADG
FMGLAFGSIQDGDATPIFESLMEEKLMDKPRFGIYYASGEDDSSGDKAGKGVLTLGGSREDKYVEGDLIS
VPLATNNGEFDLWRSIIHSTTGKKTDKKCKTGKAEKETEMNGMSIVFDTGASAITFPKSMIDSIYESIGM
NYTAILKGEHVPLCSEFTKDWSLTFKIGYYGDEKNVTVRGDQLRIPGFANRDDACWPPVQDGPEGYALIG
TLFLRNFYTVWDYSIFPGTDGFNDPHLSFGYLKEGF
>FGMG_006750-RA | FPrate:0.720 | OMEGA:S-159
MHPSHIFSTTILLLPQVIAQEGICWGVNDMQWKDNHKCPGSSACCGPDATCMPNRLCQRKGQAKNQFIRG
PCAVAPYDRKKCAANCIKEETNNRFPRVEQCDDGSYCCDYDSGCCVGGRGVFLSSDGSIEDNSTSTTSEL
SSTFSTLSTTLSTFSTEYSTTTSEPSTTATAEADTEDEDADNS
>FGMG_009761-RA | FPrate:0.720 | OMEGA:W-336
MRFSILPTVALALYNGLVAANPVPELESRQTSGLDAAMKAAGKKYFGTALTVRNDAGETNVLNTKGEFGS
ITPENAMKWEAIQPNRGQFNWGPADQHANAATQRGMELRCHTLVWHSQLPSWVANGNWNNQTLQQVMKDH
INAVMGRYKGKCTHWDVVNEALNEDGTYRDSVFYRVIGEAFIPIAFRMALAADPTTKLYYNDYNLEYGGA
KTAGAIRITKLIQSYGLRIDGVGLQAHMTSESTPTQSTVTPSRANLASVLNSFTKLNVDVAYTELDIRMN
TPANQQKLQANAAAYARMVGSCMDVKRCVGVTVWGISDKYSWVPGTFPGEGSALLWDDNFSKKPSYTSSL
NTIRGQ
>FGMG_010732-RA | FPrate:0.720 | OMEGA:D-90
MLSKAIIAAITLVGLAAAAPLSSYDPCPTICQDGVNDCGESWGGCWDICKPEESPTPPPCTATYTPTIPP
ITLPVITPDPTITLSIITPDPTITLPIITGDGEFTTAVPTPRLED
>FGMG_002518-RA | FPrate:0.741 | OMEGA:I-94
MQLSIFTFAIMAITGVQAGTHKAAACVSNRVSAPFGGSAWSVSYNWVTNYEVLPDATKCACDYYAARNKG
SEWWNTCPDCKFDGTICNSPAGHIGGDEMEYYCKELCGAQGSEADSG
>FGMG_003982-RA | FPrate:0.741 | OMEGA:I-112
MIPKTLVVAFMASCFVSSSNAGPCKASSASTEISLSAELPTSTAIPTTIDTTLAMTDSESDTETSTASQD
SATSIVSQEATPTSFINTASATTQPTTPVFVEIDCSTNQDCIAALGPAAIGIYGCIDLICQPTAAPQL
>FGMG_004011-RA | FPrate:0.741 | OMEGA:S-195
MRSAAAILLAIANLSLVQAAPSPKVYDESVFENAGTPTWKVAVVEGEAPVVIKGTIQDVMEQLKVDYPEY
AREAQEKIDTAIEAERLQEEAPPSAEAQALAALQKRDHNICWNFPSAREGPIREGIQYLRGIAGGLTVRA
GPGACDRISCSSNAGIFICNDNRTPFYIPSWDNVANAARACNNECRQFCFDCGFSTGWWTAGQRFHDANF
NVILRESSC
>FGMG_004174-RA | FPrate:0.741 | OMEGA:V-198
MFTKFTTIVAAAAALVSANPLPRGESGSCSVTPHDMYSSSIGVLGCKINTNRVAYWPGSVDCNNICVKVS
NEGRSVYLLKIDSSGGAHDISYDAWNYLGFGKSATRDPQMGGGINMDYEYVHASKCKDLLDDGKLPLAAA
NSMNYVASCLSEPKSWVAQNYELYNINDPVCKHGVDEKCHLNLAVSNQPECPSGLGSVKDLKLKVENILY
GTGEKAVAL
>FGMG_005048-RA | FPrate:0.741 | OMEGA:S-172
MQFKTLLVAAGVASAAPKATTPKNFEFQGLALRSASPIHFNYLQASQESFELKLKDQKASCYSSKDKPQE
ATFQLYGDELWLYSVGNPRQQAYVDFSGMGQGKFGYTTGAQPAPKNASRKGWKVDKDGMLTCDGASFVAC
PIGDNLEKTSWSVWVYNSIDNPGGNKNCLPFSVKAVKVEKPIPCSYSAIQPKA
>FGMG_006840-RA | FPrate:0.741 | OMEGA:C-135
MIASKIGKVLLSSAMLWATTSASNLGLKDTGTPAGCTGSTGCCIPSCLVDVSDFWGCNGNVAFSGTCQWN
YDNPQGTQDVGGCDDVQVTFLRDPDGNPAIDLYHKTDKTYDRYAFNNCQAPTVGGSQCVPKGGGCDTNII
LTGAQGSKKRSTFSA
>FGMG_007277-RA | FPrate:0.741 | OMEGA:N-439
MHFSTLFVCGTIAAGASAYRGQRIRRQDGTVDPGQPSDCTWWETKEEDYQDCAYLENGWNLTHEKFVEYN
PTVKDDCSGMKFGHSYCVEINNGIPLPGETSSTTTSVAQASPTKDSKYSPTQDKLIGTCTNFYQAKKGDT
CPKIIAEYKDIFDFDDLFKWNPAIGNDCSGIWANYWYCVGAPGMPTGAPTRTAEPTAKPTATQEGLIESC
TSFHMASKVPGSPTVKPSVTSAKTTATGIPTPSPIREDMVKNCNKFHPVSKTTTCSSIETYYNLPFSQFL
AWNPAVGKDCSGLWATIMSATTILATGIPTPSPIQSGMVKNCENFHQIKSTTTCASIEKYYNLPLATFLL
WNPDVGKDCSRLLTGYWVCIATVGWKSPTKTTTNVPAATKTSNGIPTPKPIQSGMVRNCKKFHPVSSTTT
CDSIQKYYKITMAQLVKWNPAIGSKCTGLWAKYYVCVAA
>FGMG_008150-RA | FPrate:0.741 | OMEGA:S-175
MFKLASITTIALAAIANAMPQGIGTGSNACPPGCKTKDMTNNHQCGKNGGCEISKSEVEGQSVSLSASIS
GDGWISAGFEVSEYQESGEAQTCYGEPGDTICVWWRTANTMYTVDVQYYKCCQKSGGLTPRLSLHPTRTT
KALVRFAVAMSSATPRATVIGTTVMERSNGGVTVSGGPQEWKFGGDLTGLVPDSDEIPEAKAP
>FGMG_010589-RA | FPrate:0.741 | OMEGA:H-253
MFQYIIGFVAFLVVFSNPIGDFFYPDRAAQVKDASPRPKLNESLLAIDAPNATAPECAPDGYLARIVSRE
PLIVYLEGFLNQEESEHLLDISEPIFVPSTITSNGEATHRDASVRDSDVAVIPRTDSVRCIESRTRALQG
WRPELWIERLRTQRYGPGGHYNHHFDWSHNSRGWGRVSSLMAWVGGSDDLKGGGTEFPLVKRPVEKEWCR
FIECGDGGEDKSEVGVVFKVLPGNAVYWENFAADGRGYDETWHAGLPVDKGTKVGLNIWSFGRI
>FGMG_012037-RA | FPrate:0.741 | OMEGA:S-297
MMAQNVLIALIGLAAGVQASPCKPSSVTTITDTASTDTSLATISTDIPSTAGTVTSGELTTTTTEAPLAT
TTTTGPKLTYNCPGGFPSHSSCGIRYNHDRSNGYVVGTGGAGSMAAKSLDICMQTCAEHANCDFFAFWPG
QLCELWSGHYEYDSSGNMGASSWYELSCFCVPGRETPPTVATTTEATTTEATTAAAAATYACVNTEKSPF
PANLVCNSHGVYDGTSMDFLDAPANTKTMESCRKACHDDNRCTFFAFTPGQSCWTYSGTIERVNDHQTDY
IWYDMDCFCDIDEQPTSTVIEATTTGTSADTTTLTEPAPTD
>FGMG_002381-RA | FPrate:0.756 | OMEGA:E-199
MKFSTITSLFLANAGLSLAAPTKTLAQATAIEVKTGDNGIETPLPIQPGMVDNCDRFHFVAKNTGCLQIA
NMYGITFEQFKEWNPTVGDDCRTLWADANVCVRTIGYKYPVSVACYGSEDILPWGSNKAAALTAARDWCY
SGGGGGIYEIYETKTGCVNAPSGAGKFVFEVKTTHGTRLGLTGGRCQTFLNLGINGCKEGAQTNTEGWTM
ETTFETGKCKA
>FGMG_003829-RA | FPrate:0.756 | OMEGA:S-299
MRLALSLQYVSGFLQLATCILSPLPPDYKNAAAQWAFLSYKNPSLAVLPGHFNRSVFVPFTDSEVSDPSL
AKDLDYINSTNFVAYDERFFDLLGPDAKIRKVHQLPFQTHESPCYNPVTKDLFFIEWGPPGGDNGFHDWQ
YLLNTETHKLRKIKTDPPIHNVHGCAVYDGDYYVITDGSSNETSSLNKITPELKKTTLLNNYFGLPFSGF
NDMDVDDEGNFWITDDHYGFGAGVVKYTPPTLSTVYFVNKTTLRPRPFHTTSGQANGITFHKGQDKKGTI
YISNTAASQPGPAPHKLNSFGPENSHHSMCPILGLLHRTRNC
>FGMG_005594-RA | FPrate:0.756 | OMEGA:W-121
MVSFKSILLFAGLAMAAPTPDTEKSLTKRFNGGWCGVHIHLFNGENPKGSHEMNVFVYDGKQQLVWSKES
IWGNGILMAESENLPAVLNINTYGGGALATFTYGDQDWDSNEKPRCSVGAWDGPSFGSSTQTLEMDCGFSC
>FGMG_005794-RA | FPrate:0.756 | OMEGA:S-220
MKYATILALAGVSSAAVTKTLPKSAGVTSFPTAVPVKGSFDGGMKRFERSTNVCQGQTETGEKDAMFILE
AGATLSNVIIGASQAEGVHCKGTCTLNNVWWADVCEDAITLKQTSGTSFINGGGAFKASDKIVQFNGRGT
VQIKDFYAEDYGKLVRSCGNCKDNGGPRNVIIQDSVAVNGGVLCGINTNYGDTCKITNTCQNSGKYCDRY
QGNSDGSEPSKIGSGPDGKFCITSGATKTC
>FGMG_007044-RA | FPrate:0.756 | OMEGA:W-273
MKTAGLVAATMALIQSASAHYIFQQLTVGSTKYPVFQYIRQNSNYNSPVTDLASNDLRCNVGASGANTQT
VSVKAGDSITFTLDTAVYHQGPISVYMSKAPGSASAYDGSGTWFKIKDYGPTFNGGSSSWPMTITYTFNL
PVCIPNGEYLLRIQSMGIHNPYPAGLPQLNPQFYISCAQINLNGGGSTVPGSQVKIPGAFKETDPGYTAN
IYSNFNSYTIPGPSVFSCNGAGGGDNSGTPPVTTLQTTTQPSAQPTQPGQCASLWAQCGGQGWAGPKCCA
TGTCKATNDFYAQCVQ
>FGMG_008407-RA | FPrate:0.756 | OMEGA:V-438
MLPKFLISALVSGALAATQDSLPYANDPNRCDTTCQLNYRQALTGDASQWVNQNVSTDPFYSNPSNLSDY
SAGDLVKWEEIPSIETTKRWTLPGGVTLNRFFYMTEDINGKAIPATGFVMIPYSNPLGKDKPFRTVVWTH
GTAGGTRQCAPTNHRGLYYEWQAPFALVLQGYVVIAPDYAGQGSDIPEGFMYESGALHAGDVSFGLQAAR
KALGNKITKEWVVIGHSEGGMTAWRTDEREAMKGKATGGFLGAVAMAPALQPIKLIPESFRRAGDGPAGD
VVSIFLLQSLSRLYPSIKVEDYASDIVMSRIPLAAQGCLATGGSLYGNLTVEQLYKNTSWVEGPEMVDWQ
KRFNGAGSHKLAAPMLVIQGEADILTYAKYAEEDFDAKCKEFPESTAEYRTYPDLDHGAVLHASHSDFLP
WIADRFNGVKLSKGCKKVEVSPATDRFSLVTQDWVALIR
>FGMG_000347-RA | FPrate:0.773 | OMEGA:T-360
MIANKLTIVTAAAALLEPALALGHRHGHQHKRGDTVVATIDGQVVSWENNYYGPGGAAPVATQVASKPEA
PAAPAPAPAQPTTIIKVAKPSQAAKAAYEAPKAKESKEAAAPKKAEKVEQVKQVKAASAPKKTKPSSGGS
SGSAGLSHKRGVCYNNVDLANTFYKDCPNCGWGYNWDSESGGLDSGLNFIPTLWSDDAVHVDRFASNCAK
SLANGAKAIFSFNEPDNGGQAHMTPEAAAAAHIKYLNPYAGKALIGAPSISNSGLAGEGREWLSAFVEAC
GDKCHFDFCNIHWYSEVEYGETLFEHIEKSSEICGGKPIWLTEFAPKGSDDAIASWLEETIPRLEALDTL
DAYSYFKVETGMLMTTETEMSSYGSVYASA
>FGMG_002447-RA | FPrate:0.773 | OMEGA:G-121
KPVQAVLSAVLTPAAAWEATLYTDSICLAKGNTQYRIISGGVDGGCNVLGKDMPGASCDKFTNGGADKGA
CDGEKFQPSSILVQPDTACIVYADDHCGVGGELAYPKNNIPTCLGYTAGIGFGLSSIKSFACTASSNLKG
SGIPGF
>FGMG_002517-RA | FPrate:0.773 | OMEGA:S-229
MQYSTLVFALLAAEYTPGQHIDDSEVIVPVKDTAYVVKEDVYLAKLKAQGIKIGAPELDPKWVRRDINVN
DLPERDEAAIAHDKRDDCSGTNYIVTDKTETFVDWDVQMSPVACAIGADMDISVSSGYTISNSVGGSAGT
DLTFVADRLGASLGVNYSKTWTTLTSVVTKGTVKDGFCGTVITKPTTTRRSGRQFRGCIGSATEVGTWYA
DDRGHGSYNGITWIDGAISTCSKPGSNPPLSRCNGQGNFH
>FGMG_003715-RA | FPrate:0.773 | OMEGA:L-59
MKTAILITALFSVAIAAPAPLPASDAAQDLDTRASCPGTQSCVGGYCTIYTCVPAEPMLLDWTGRDINVI
VAPIGFKGSDSWQ
>FGMG_005527-RA | FPrate:0.773 | OMEGA:E-373
MGSWSRIKLVTLTAAQLVAVVYCNKPKCASLAQSTCLAGHNATILSTTYHAVGALNISGSQNDIPFCQVC
ASVEYGNNNSLVFDVWLPDAKHYSSRFMAIGNGGQGGEISHADMMAELNNDLGFAVAGGDAGHLASDNMA
GDMPGMGAPGIYQPFLHDESQVKAWMHDAISLFTPASKQLIEVFYGKEADFSYFRGCSAGGTQGFSLAEL
RPGLFDGIIAGCPANWFTHMLLSFLWNAQHTRLQAARALYKGPVHSDASASSLFPGLALGSEAGWSLPQV
QGALSNAFTVPMLQNLVYKNLTYDCDEFNWESDVDFLDTEAGPLINAVEKNLTSFRDSGGKMIVYAGWAD
PNISPQWSIEHVEAITRGTLGKEVTIAENDFIKLVMVPGEDTAGL
>FGMG_005725-RA | FPrate:0.773 | OMEGA:C-129
MRFSVCTAITLAAGALAAKEKVTVSKLSIHSVGSPVGTSIKSVSFVLNGDDADNVKCSAKNVAFPVPDDI
LSCGDSNYAFTLWEGEKGAKFRVMVYHDVGDSHADLRGGADIRTKCDNSQGSGPADEICTQVKPVSFTID
GPVGSSPGN
>FGMG_012034-RA | FPrate:0.773 | OMEGA:I-180
MRSTALLHGIAMATLIRLAESKSIELVFEQDLETGGVATTAWDDSGSRIIALSCSDTVQLGNQTITFHVK
KDASGYFTIGDDKFPIEEDDSTGVLCSRMYNNEHARAECILSVPLVEDLDPITPDSLFECFAESEDPDRF
RWQPIDVDSHGPVNGDNRDETETMGQPRHIGRRQGCQTGIAQIQWPGVPRNPANGGGTSS
>FGMG_012286-RA | FPrate:0.773 | OMEGA:G-345
MVRFLASLTAFLGYKGSPTPDVQDCTGTNAISMRCASAEVPYMRDFFYVGGRSVKAASGNITVDQVYVEK
LTPAGGITQKNPLVFFHGGGLSGSTWLNTPDGREGWASYFIKKGYAVYLVDNNSIGRSSENDIAGYPMAS
GSATETAKLHTQWPGTGADGDPVYDQFKKSLIPLTTNFVGQENALRAAGCEMLSLLGQKAFLVSHSLGSR
NPLLLSNDCPEYIAGSINLEAATSPFWSYAEGLGGFAASPWGLTNTPVTYDPPVKDPSELKHESVGNETL
AHRNCYLQVEPARKLPQINKVPYLLLTGEASVHVTYDHCAVDFLKQAGGKPEWIKLADWGIKGNGHFLHV
EKNNLQIAAIADAWIRGRLVKSKLGV
>FGMG_003448-RA | FPrate:0.789 | OMEGA:H-230
MLANSLFVLASAALAVATPLKSFGPGSSCKPGKPMPVLPVNGGPTELPSPPQGVTLKHIALGFGIQNYTC
ADAAATPAAQGALAVLYDVTHLYPGQGPASLPQDKWTSLTSNVLNTGKIPLNLNDNGVGASLTNPFPKKS
SFKLEVEGPPKNLPYLGHHFFNAAGVPTFDLDAANQLLICKKLDGIKAPASAPAGPEGTGAVDWLYLGDA
GGSIGVSYVYRVLTAGGASHGCKAKGTDSTSYTTLYWFYG
>FGMG_004491-RA | FPrate:0.789 | OMEGA:D-294
MKFSSSAVLLAAAIGASAHPSGHAHQRAHAKRDFIVANNPVTVYETHVVTAPAAPATAVPEAPAAAAPAP
VPSQPKADEAVPKSWATGPWTSDVPKLNKGKKHSSGSGYKPFCGGKKAKRATLEDIAATGNTGVPGDYGC
NMMTVDSDVADKYTYTTTFKNDHSEDKECACWNKIGPLGKIDGFFAKNIPMHFTVGAKSSQVVAFDENSQ
GGCACSSKEVPTTINGLVAGTWLEFDFGSERNGGWSGADASCLVSAKEKLNIPGLRVCGHNTCSTINPGG
TGTNAYLGGMEAEDGVGLNINDKEVRLTVDIDYEG
>FGMG_005710-RA | FPrate:0.789 | OMEGA:N-301
MVSWNNIFTVALGLIGSARAYTNPIRNPGGGDPQITYTGGYYYLISTEWTNLQLSRATTIEGLKTATPKV
IYTDSDPSRSSNVWAPELHYLGGKWYIYYTAGKAEDLTGQRSHVIKGGATPWDSWSYGAKLSDDWGIDGT
ILRTNQFGNYFVYSCMTGIQYQSTCVRKLGSDFMSAGALSIISQPDQAWEKSGTPVQEGPNALYFGGKTY
IAYSANYCWTPDYCVATLEWDGKTDPAKASAWKKSNGCVLKSGNGSYGTGHNSFFQSPDGKQTFITFHAT
SNKNGACDDTRYAMTQPLTANADGTPNFGKVQPFSFQFAEPSK
>FGMG_008285-RA | FPrate:0.789 | OMEGA:C-219
MKPTQVLVALAAIAYAAPVSDDTKAKALEIDDDFPLAELEAYFEAHMNGETSEANSLQARQFSSSTYNQL
TDGTPCRPVTMIYARGTTQAGNVGDPAAVGPVLFNNLASRIGLNNLAVQGVAYPANIAGYLAGGDAAGSR
TMADLISRAATQCPSTKIIISGYSQGAQLVHNAAGMLSASVTNRVTAAVTFGDPKQKQAFGTIPSSRTRI
FCRAGDNICDGGIIVTPAHSQYQQDAPAAADWIAARV
>FGMG_010994-RA | FPrate:0.789 | OMEGA:G-424
MKGSFASLVALLAVNVVATPSFRNIFGLEKRQAGRCGTGFGGVCAANECCSSAGWCGTGYLYCSAPACQI
EYGPSCDANVRPTGPDTTNVARPKVGSIPYGQAIYRCNRNGDIAITYDDGPYTYTEDLLDLLQRYNVKAT
FYITGRNLGKGAINDPATPWPGLIRRMIRDGHQIASHTWSHQRLTTLSRAKFWNQMIFNEIAFADILGYF
PTYMRPPYSASNATTDAWLGELGYHVTYFNLDTEGYLHDSPNTIGTSKQIWDTTVEGKSPASNKWLHIEH
DPVYQSVYNLTEYMLKSLARNNFRGVTVGECLEDPKANWYRSVTPSSASTTTTAATSSATFPLTTNGRCG
SRHGGATCRGEFNGETCCSQNGWCGMGFRSRRDRSRLQRTRADAVLHLEARNVINGIRVAQELDGVELQV
ITVGADVRAHLEYAIEESSLLKLG
>FGMG_012146-RA | FPrate:0.789 | OMEGA:L-422
MRFPVHIISLCVFSGLGLAAPSHSDLESRQLIGGLLKGVDGTLETVVGGLLGTLRKAIDSGDRDKTLDIL
HVLEPAKKHKNVEETFAVLEKISKSKPKTIIDYSAQLIVNGLISGNTLDLFAYAKGLVSAQNGSNNKNRN
PPKEVYPKVADCDASYTTSEAKLRAAIHIPPTFTYGEKPPSFYVEWADPVWVNVPVLLLEDAQVNAEYAA
YALNYIASLTKRNVSVIAWSQGNIDVQWALKYWPSTRKVTTDHVAISADYKGTILANIGGATGLINTPAV
VQQEAGSTFINTLRSNDGDSGYIPTTSLYSSLFDEVVQPQEGTGASAYLLDARDVGVTNAEVQKVCTGKL
GGSFYTHESMLANPLTFALAKDALTHEGPGKISRLDLADVCNRSLAPGLGLGDLLITENAVVIAALSLVL
YLPKQVDEPAIKQYALEATGTC
>FGMG_012263-RA | FPrate:0.789 | OMEGA:L-330
MLCHVIYGLLAVASLLSDAAAGPCKPSRTLTLVTSSIVIDTTLSLTLDTTLSSVTEDASLSTASDSLSTS
TTEDSSSTTSRVTSSIAVDTALSLALDITLSSVTEDTSVSTVSDYCSTSTDITLPMPTDDALSSTTDAST
SWTSTTNAVSTTETTSSVETSLSTTGISTTTQQVSTTTTEATTTTEATTTTEAATTTSDAPAIQPTFALQ
LANSALQSVNGKKPRYKKGSSGSAMYLTVSAALENSYVTGDFHLEASTNRLMVGDMYAAVGAAPAAILFA
ETVDDVASKNHLYISCSPLVLGQKLECVLEGTSRSQFYVYSLEQISTPMLICPPGSPPNSSYTTVDLIVV
EA
>FGMG_000121-RA | FPrate:0.807 | OMEGA:I-102
MQLITLSTVFFIASALAADCSGNSNSRLEEFKEAYWSAREKMCSNSDCTYQAACTISAQKSVGSSWAKTT
VVAELKRKNTGGKKGFKDCWDATEDIINQCVIGNHQLSGTWESDGQLYQFNGYFA
>FGMG_003580-RA | FPrate:0.807 | OMEGA:T-59
MKPIPLVTMVAFAAATPTPKGCTPGTYSCTADLKGWQVCNVDRTWVISISFAGACPLKTACLFNKQNGSP
YCVPPGFHF
>FGMG_003773-RA | FPrate:0.807 | OMEGA:C-72
MLFSTIILAFPLAVASWPHIEACRKAWPAEPCAYIAGNAMVLGTCESVCETTNCPNNLVCKPRRWTRHCD
NCGGDLNTGGNRGSTHGTDHGPTIL
>FGMG_008557-RA | FPrate:0.807 | OMEGA:W-311
MNRILYSGLSLCFYAVWTNALAISEATKRPEAGYIYQPAPTPMFDFQALKHLDLGKRQASSTVETTLTVV
VSPDSTCGFLSGSPGNAITCANGARCSWELAHITAIVCGTAAHLQCYDRDYALNTESCDDVCQENTYNLL
CTDRSAPYCGTYAYPSGIRAFKCSSRSMARFQSVSFTYNNQDDRTFSTTTFALDATTTLEPIETDTSPTG
NEEPIDTSNPNGSSEPKPTETTETGSGGSKTNVGAIVGGSIGGFLVLSFLVLGHNIPQTPGDSVPPMNQN
YPKPGVASPTTTEWRGSTMTAQSPSSPVSTWTGQYPSSAADQVTYQEMPGSPPYTR
>FGMG_010292-RA | FPrate:0.807 | OMEGA:S-217
MKSYSLVALALIANPSYCLNKGENIHLQWSLCDRDAAAVLEKLGEEVRAPYKQNPITYFDMMPPTHAQQG
VMFRTKVNKGDPFSVIKVRFDEKPARLPPGADCVWDRYGDYIPYTCGARYLLSDKTKEIWSEDQVRFAEK
YDDIDWDGLVPYGPFPDGKWKLKILGHKAKLDDVVAGKLHLMEIELSTPKIGSEEVYDKVTEYFEEHGVL
LCDPQQSKTVRLFRDRGLIDGQVSEEL
>FGMG_012098-RA | FPrate:0.807 | OMEGA:A-95
MLFFKSIVSLAALVGVAVASPIETRQSATRCGSTSYSAAQVKAAANAACQYYQNDDTAGS
STYPHQYNNREGFDFPVNGPYQEFPMLTSGVYTGGSPGADRVVINTNCQFAGAITHTGAS
GNNFVGCTGTS
MSSTILFAAGLLVGAAQAYTQVNVASPFMLKNIDPIVFPGQHGKSHLHSFFGSDAVTVDTKTSAELQKGC
TNAENPNDLSVYWIPTPLYTADGTKYEPIPVMRFSAYYNLGETPAEIAIPQNLKMVAGDAMAKTQADMPP
[truncated: 370 more rows]

## Sheet: Table S9
Table S9 Annotation of putative effectors encoded by the FG-12 genome
# emapper version: emapper-1.0.3-35-g63c274b emapper DB: 2.0
# command: ./emapper.py --cpu 6 -i /data/shared/emapper_jobs/user_data/MM_cni5gyeb/query_seqs.fa --output query_seqs.fa --output_dir /data/shared/emapper_jobs/user_data/MM_cni5gyeb -m diamond -d none --tax_scope auto --go_evidence non-electronic --target_orthologs all --seed_ortholog_evalue 0.001 --seed_ortholog_score 60 --query-cover 20 --subject-cover 0 --override --temp_dir /data/shared/emappe…
# time: Mon Dec 28 15:18:31 2020
#query_name	seed_eggNOG_ortholog	seed_ortholog_evalue	seed_ortholog_score	best_tax_level	Preferred_name	GOs	EC	KEGG_ko	KEGG_Pathway	KEGG_Module	KEGG_Reaction	KEGG_rclass	BRITE	KEGG_TC	CAZy	BiGG_Reaction
FGMG_012395-RA	101028.EKJ76512	7.6e-36	156.4	Nectriaceae													Fungi	1FVKR@110618,21BBJ@147550,2C3HW@1,2T43X@2759,3ANVF@33154,3PEEB@4751,3R3WF@4890,3TN6M@5125	NA|NA|NA
FGMG_012389-RA	101028.EKJ76519	3.6e-83	314.3	Nectriaceae													Fungi	1FYFR@110618,21F6Q@147550,29HG0@1,2RQNK@2759,38UEQ@33154,3PW1H@4751,3RF31@4890,3TMUI@5125	NA|NA|NA	S	Chorismate mutase type II
FGMG_012444-RA	5518.FGSG_11496P0	1.8e-135	488.4	Nectriaceae				ko:K20628					ko00000				Fungi	1FSVV@110618,21PF0@147550,28NQQ@1,2QVAP@2759,39ZPN@33154,3NV9N@4751,3QRVY@4890,3TK3W@5125	NA|NA|NA	S	Carbohydrate-binding module family 63 protein
FGMG_012441-RA	5518.FGSG_11493P0	3.7e-164	583.9	Nectriaceae													Fungi	1FQ9W@110618,215ZT@147550,2D3PD@1,2SS8U@2759,3A58J@33154,3P433@4751,3R2CA@4890,3TT0G@5125	NA|NA|NA	S	Necrosis inducing protein (NPP1)
FGMG_012439-RA	5518.FGSG_11488P0	1.5e-164	585.5	Nectriaceae													Fungi	1FZ4W@110618,214RV@147550,2ECWD@1,2SING@2759,39WGW@33154,3NW4V@4751,3QV1X@4890,3TSKF@5125	NA|NA|NA	G	Glycosyl hydrolase family 61
FGMG_012381-RA	101028.EKJ76525	1e-124	453	Nectriaceae													Fungi	1FN4M@110618,21BGI@147550,2C7KT@1,2T4TH@2759,3AM5Z@33154,3PDQJ@4751,3R3MT@4890,3TN5U@5125	NA|NA|NA	S	PAN domain
FGMG_012398-RA	101028.EKJ70464	1.5e-119	435.6	Nectriaceae			1.14.18.1	ko:K00505	ko00350,ko00950,ko00965,ko01100,ko01110,ko04916,map00350,map00950,map00965,map01100,map01110,map04916	M00042	R00731,R02078,R02363,R02383,R04693,R04884	RC00046,RC00150,RC00180	ko00000,ko00001,ko00002,ko01000				Fungi	1FN13@110618,21Q6Z@147550,29DZU@1,2RM4B@2759,39XMX@33154,3NX6H@4751,3RJF5@4890,3TTU2@5125	NA|NA|NA	S	Common central domain of tyrosinase
FGMG_001749-RA	5518.FGSG_01660P0	2e-113	415.2	Nectriaceae													Fungi	1FTS6@110618,21NMX@147550,2935K@1,2RA2H@2759,3AWGA@33154,3PZHH@4751,3RINA@4890,3TWCS@5125	NA|NA|NA
FGMG_007283-RA	5518.FGSG_09126P0	7.9e-143	513.1	Nectriaceae													Fungi	1FSQJ@110618,218SS@147550,2C42F@1,2SHR0@2759,3A32X@33154,3P2UT@4751,3QWMC@4890,3TW5H@5125	NA|NA|NA
FGMG_007115-RA	101028.EKJ72725	1.3e-54	219.5	Nectriaceae													Fungi	1FUZC@110618,21ASF@147550,28MJ0@1,2QU2K@2759,38V44@33154,3PWRT@4751,3R0ET@4890,3TIQ6@5125	NA|NA|NA	S	Glioma tumor suppressor candidate region gene 1
FGMG_005229-RA	5518.FGSG_03483P0	5.4e-187	660.2	Nectriaceae	pelA	GO:0000272,GO:0003674,GO:0003824,GO:0005575,GO:0005576,GO:0005975,GO:0005976,GO:0008150,GO:0008152,GO:0009056,GO:0009057,GO:0009987,GO:0010393,GO:0016052,GO:0016829,GO:0016835,GO:0016837,GO:0017144,GO:0042737,GO:0043170,GO:0044237,GO:0044238,GO:0044248,GO:0045488,GO:0045490,GO:0047490,GO:0071704,GO:1901575	4.2.2.10	ko:K01732					ko00000,ko01000				Fungi	1FSYJ@110618,21404@147550,2BZ7G@1,2QXM6@2759,38DKY@33154,3NXF9@4751,3QNUJ@4890,3TW76@5125	NA|NA|NA	G	pectin lyase
FGMG_002497-RA	5518.FGSG_02354P0	1.7e-256	891.3	Nectriaceae			3.2.1.14	ko:K01183	ko00520,ko01100,map00520,map01100		R01206,R02334	RC00467	ko00000,ko00001,ko01000		GH18		Fungi	1FR60@110618,218Q7@147550,39RZF@33154,3P0HB@4751,3QPV3@4890,3TE1J@5125,COG3325@1,KOG2806@2759	NA|NA|NA	G	Glycosyl hydrolases family 18
FGMG_004449-RA	101028.EKJ69426	2.4e-89	334.7	Nectriaceae													Fungi	1FVAH@110618,21ADQ@147550,2C9MS@1,2T4N2@2759,3AKHD@33154,3PDKN@4751,3QWBE@4890,3TIN3@5125	NA|NA|NA	S	Alternaria alternata allergen 1
FGMG_005117-RA	5518.FGSG_03599P0	3.1e-41	174.1	Nectriaceae													Fungi	1FVE8@110618,21CUJ@147550,2EUF8@1,2SWM0@2759,3ACZP@33154,3P9T8@4751,3QXXB@4890,3TP2F@5125	NA|NA|NA	S	CFEM domain
FGMG_005768-RA	5518.FGSG_02999P0	1.3e-129	469.5	Nectriaceae													Fungi	1FVT6@110618,21K5Y@147550,29NMI@1,2RVYF@2759,38V5N@33154,3PWKP@4751,3RFJN@4890,3TVRV@5125	NA|NA|NA
FGMG_006835-RA	5518.FGSG_08213P0	3.1e-85	322	Nectriaceae													Fungi	1FN5T@110618,21MQS@147550,2D428@1,2STK8@2759,3A9ZU@33154,3P7NC@4751,3QYTD@4890,3TVH8@5125	NA|NA|NA
FGMG_007032-RA	5518.FGSG_08021P0	3.9e-135	487.6	Nectriaceae													Fungi	1FPRZ@110618,2124J@147550,2EFXQ@1,2SM0P@2759,38FQ8@33154,3P0UM@4751,3QN2J@4890,3TEM9@5125	NA|NA|NA	S	Protein of unknown function (DUF3129)
FGMG_000014-RA	101028.EKJ72007	1.5e-118	432.2	Nectriaceae													Fungi	1FPRW@110618,21MTW@147550,2F4A5@1,2T59Y@2759,38Z4T@33154,3PYRD@4751,3RHV2@4890,3TVPF@5125	NA|NA|NA
FGMG_003813-RA	5518.FGSG_10657P0	3.8e-82	311.6	Nectriaceae													Fungi	1FUX1@110618,21HG3@147550,293VG@1,2RASC@2759,3AX6K@33154,3PX0W@4751,3RG0F@4890,3TNVW@5125	NA|NA|NA
FGMG_007538-RA	5518.FGSG_09353P0	3.1e-162	578.2	Nectriaceae													Fungi	1FT81@110618,214RN@147550,28IT3@1,2SJ8E@2759,39Y0X@33154,3NUHZ@4751,3QRI5@4890,3TM1M@5125	NA|NA|NA	S	Protein of unknown function (DUF3129)
FGMG_000843-RA	5518.FGSG_00783P0	7.6e-126	456.4	Nectriaceae													Fungi	1FN0U@110618,21AEC@147550,2EK54@1,2SQ4D@2759,3A368@33154,3P3G5@4751,3QVU9@4890,3TSPK@5125	NA|NA|NA	S	Cutinase
FGMG_002157-RA	5518.FGSG_02036P0	7.1e-47	193.7	Nectriaceae													Fungi	1FXB7@110618,21U3I@147550,2CNHI@1,2QWCT@2759,38QWC@33154,3PSP8@4751,3RC3I@4890,3TRDE@5125	NA|NA|NA	S	helicase activity
FGMG_002297-RA	101028.EKJ79290	1e-273	948.7	Nectriaceae													Fungi	1FU59@110618,217YX@147550,3AINU@33154,3PC4Q@4751,3R1WR@4890,3TJKA@5125,COG0277@1,KOG1231@2759	NA|NA|NA	C	FAD binding domain
FGMG_004126-RA	101028.EKJ76093	1.5e-86	326.2	Nectriaceae													Fungi	1FY4F@110618,21KAU@147550,2CCR8@1,2RMN8@2759,38RBI@33154,3PT4C@4751,3RCIK@4890,3TQDG@5125	NA|NA|NA
FGMG_007027-RA	5518.FGSG_13454P0	5.4e-25	120.2	Nectriaceae													Fungi	1FYCR@110618,21U65@147550,2ETWZ@1,2SW5J@2759,3ATMJ@33154,3PHW3@4751,3RGBF@4890,3TRRE@5125	NA|NA|NA
FGMG_001870-RA	5518.FGSG_01776P0	3.5e-118	431	Nectriaceae													Fungi	1FME6@110618,21FJ8@147550,2EFKA@1,2SKS2@2759,3AC50@33154,3P8PJ@4751,3QYBN@4890,3TVEK@5125	NA|NA|NA
FGMG_003712-RA	5518.FGSG_10554P0	1.8e-115	421.8	Nectriaceae													Fungi	1FVVV@110618,21C82@147550,2EZZC@1,2T17T@2759,3A8UK@33154,3P7J9@4751,3QZ48@4890,3TNMK@5125	NA|NA|NA
FGMG_003897-RA	5518.FGSG_11540P0	1.6e-71	275.8	Nectriaceae													Fungi	1FUH1@110618,21SZJ@147550,297SW@1,2RET4@2759,38JZU@33154,3PMVG@4751,3R6WN@4890,3TNS2@5125	NA|NA|NA
FGMG_004514-RA	117187.FVEG_10339T0	2.6e-38	164.5	Hypocreales													Fungi	21GEP@147550,29P35@1,2RWEI@2759,39IRZ@33154,3PYNN@4751,3RHS8@4890,3TNKM@5125	NA|NA|NA
FGMG_012071-RA	5518.FGSG_11164P0	8.3e-134	483	Nectriaceae			3.4.21.4	ko:K01312	ko04080,ko04972,ko04974,ko05164,map04080,map04972,map04974,map05164				ko00000,ko00001,ko01000,ko01002,ko04147				Fungi	1FQGE@110618,219J3@147550,38CGF@33154,3PA2I@4751,3QWDM@4890,3TIW7@5125,COG5640@1,KOG3627@2759	NA|NA|NA	O	Belongs to the peptidase S1 family
FGMG_002378-RA	5518.FGSG_11135P0	8.1e-09	66.6	Nectriaceae													Fungi	1FV9E@110618,21CVE@147550,2EXG2@1,2SZ51@2759,3ABEY@33154,3P9RU@4751,3R0GV@4890,3TP04@5125	NA|NA|NA
FGMG_006881-RA	5518.FGSG_08164P0	2e-79	301.6	Nectriaceae													Fungi	1FVRT@110618,21J8T@147550,28ZWB@1,2R6R2@2759,38K2H@33154,3PMXW@4751,3R6YS@4890,3TVR2@5125	NA|NA|NA
FGMG_009701-RA	101028.EKJ78295	8.2e-266	922.5	Nectriaceae													Fungi	1FT25@110618,213Q5@147550,38G7F@33154,3NV31@4751,3R1XK@4890,3TCW8@5125,KOG1339@1,KOG1339@2759	NA|NA|NA	O	Belongs to the peptidase A1 family
FGMG_009951-RA	101028.EKJ75850	6.4e-15	87.4	Nectriaceae													Fungi	1FYCT@110618,21IC7@147550,2CASE@1,2RNHT@2759,38S77@33154,3PTYK@4751,3RDAD@4890,3TRRG@5125	NA|NA|NA
FGMG_000247-RA	5518.FGSG_00230P0	1.6e-56	225.3	Nectriaceae													Fungi	1FVFJ@110618,21I78@147550,2D6XT@1,2T3CD@2759,38X6G@33154,3PWS6@4751,3RFRQ@4890,3TP36@5125	NA|NA|NA
FGMG_004902-RA	5518.FGSG_03801P0	1.5e-213	748.4	Nectriaceae			1.14.18.1	ko:K00505	ko00350,ko00950,ko00965,ko01100,ko01110,ko04916,map00350,map00950,map00965,map01100,map01110,map04916	M00042	R00731,R02078,R02363,R02383,R04693,R04884	RC00046,RC00150,RC00180	ko00000,ko00001,ko00002,ko01000				Fungi	1FWBJ@110618,2158H@147550,29DZU@1,2QV06@2759,39SK8@33154,3NYXU@4751,3QSEQ@4890,3TSEB@5125	NA|NA|NA	S	Common central domain of tyrosinase
FGMG_005534-RA	101028.EKJ73840	1.1e-223	782.3	Nectriaceae			3.2.1.14	ko:K01183	ko00520,ko01100,map00520,map01100		R01206,R02334	RC00467	ko00000,ko00001,ko01000		GH18		Fungi	1FKRD@110618,217I0@147550,3A1YI@33154,3P1Y1@4751,3QS9J@4890,3TIUM@5125,COG3325@1,KOG2806@2759	NA|NA|NA	G	Belongs to the glycosyl hydrolase 18 family
FGMG_011826-RA	101028.EKJ78438	1e-46	192.2	Nectriaceae													Fungi	1FVRB@110618,21GYI@147550,2CU54@1,2RJAB@2759,38NZT@33154,3PQV9@4751,3RAC1@4890,3TP90@5125	NA|NA|NA
FGMG_012099-RA	5518.FGSG_11191P0	1.3e-159	568.9	Nectriaceae													Fungi	1FQ6W@110618,212WP@147550,2RCTR@2759,39XS2@33154,3P167@4751,3QPG2@4890,3TCWV@5125,COG3868@1	NA|NA|NA	S	to endo alpha-1,4 polygalactosaminidase
FGMG_002475-RA	5518.FGSG_02337P0	3.1e-215	754.2	Nectriaceae													Fungi	1FQ21@110618,21QZE@147550,2C354@1,2SIQN@2759,39J6Z@33154,3Q3IR@4751,3RKK2@4890,3TH6I@5125	NA|NA|NA
FGMG_003721-RA	5518.FGSG_10563P0	1.3e-191	675.6	Nectriaceae													Fungi	1FZAG@110618,21NUF@147550,39Z8T@33154,3NZS3@4751,3QUR2@4890,3TT3U@5125,COG3325@1,KOG2806@2759	NA|NA|NA	G	Lysin motif
FGMG_004823-RA	5518.FGSG_03865P0	2.8e-246	857.4	Nectriaceae													Fungi	1FMDS@110618,216WW@147550,2S0Y3@2759,3A99P@33154,3Q3YD@4751,3QR4U@4890,3TFY0@5125,COG2133@1	NA|NA|NA	G	Glucose sorbosone
FGMG_005022-RA	5518.FGSG_03690P0	6.3e-226	789.6	Nectriaceae													Fungi	1FTKV@110618,21EUY@147550,2FCZY@1,2TE9B@2759,3AWMZ@33154,3PZN2@4751,3RIT5@4890,3TMNS@5125	NA|NA|NA
FGMG_007290-RA	5518.FGSG_09133P0	1.1e-80	305.8	Nectriaceae													Fungi	1FY03@110618,21TT2@147550,29PC4@1,2RWPS@2759,3AVDK@33154,3PIA6@4751,3RBHT@4890,3TRK8@5125	NA|NA|NA
FGMG_011943-RA	5518.FGSG_11047P0	2.2e-59	234.6	Nectriaceae													Fungi	1FVDP@110618,21FBZ@147550,2ESWI@1,2SVCB@2759,3AMVY@33154,3PF8A@4751,3R45K@4890,3TP23@5125	NA|NA|NA
FGMG_002296-RA	5127.CCT65328	2.5e-107	394.8	Nectriaceae													Fungi	1FY5T@110618,21M14@147550,2D7DZ@1,2T5P5@2759,38ZKK@33154,3PZ6Z@4751,3RIBR@4890,3TQEI@5125	NA|NA|NA
FGMG_002322-RA	5518.FGSG_02189P0	2e-191	674.9	Nectriaceae			3.5.1.26	ko:K01444	ko00511,ko04142,map00511,map04142				ko00000,ko00001,ko01000				Fungi	1FS8F@110618,214VQ@147550,38CB3@33154,3PA4M@4751,3QJW2@4890,3TJTG@5125,COG1446@1,KOG1593@2759	NA|NA|NA	E	Asparaginase
FGMG_002505-RA	101028.EKJ75986	4e-112	411.4	Nectriaceae													Fungi	1FN5T@110618,21MQS@147550,2D428@1,2STK8@2759,3A9ZU@33154,3P7NC@4751,3QYTD@4890,3TVH8@5125	NA|NA|NA
FGMG_004889-RA	5518.FGSG_03813P0	6.4e-287	992.6	Nectriaceae	abfB	GO:0000272,GO:0003674,GO:0003824,GO:0004553,GO:0005575,GO:0005576,GO:0005622,GO:0005623,GO:0005975,GO:0005976,GO:0005996,GO:0008150,GO:0008152,GO:0009056,GO:0009057,GO:0009987,GO:0010393,GO:0016052,GO:0016787,GO:0016798,GO:0017144,GO:0019321,GO:0019566,GO:0031221,GO:0042737,GO:0043170,GO:0044237,GO:0044238,GO:0044248,GO:0044281,GO:0044464,GO:0045488,GO:0045490,GO:0046556,GO:0071704,GO:1901575	3.2.1.55	ko:K20844	ko00520,map00520		R01762		ko00000,ko00001,ko01000		CBM42,GH54		Fungi	1FTEA@110618,213VW@147550,28JQD@1,2QS3Q@2759,38HXY@33154,3NY8Q@4751,3QJBJ@4890,3TJRS@5125	NA|NA|NA	G	Alpha-L-arabinofuranosidase B (ABFB) domain
FGMG_006537-RA	5518.FGSG_08495P0	1.1e-177	629	Nectriaceae													Fungi	1FM84@110618,21Q3H@147550,28JIP@1,2QRXU@2759,3A0NC@33154,3P2EV@4751,3RJ6W@4890,3TCV0@5125	NA|NA|NA	S	S1/P1 Nuclease
FGMG_007066-RA	5518.FGSG_03600P0	1.5e-19	102.8	Sordariomycetes													Fungi	21BRI@147550,2EX4Y@1,2SYVI@2759,3AD4Y@33154,3P8HS@4751,3QZ6T@4890	NA|NA|NA
FGMG_004196-RA	101028.EKJ69893	4.1e-59	233.8	Nectriaceae													Fungi	1FVCS@110618,21B3X@147550,2CYWP@1,2S6X4@2759,3A8FG@33154,3P76M@4751,3QWFT@4890,3TJ3Z@5125	NA|NA|NA	S	riboflavin aldehyde-forming enzyme
FGMG_005099-RA	5518.FGSG_03614P0	7.8e-245	852.8	Nectriaceae													Fungi	1FRUP@110618,21EE7@147550,2ECAB@1,2SI6U@2759,38ER6@33154,3P05W@4751,3QTFZ@4890,3TM50@5125	NA|NA|NA	S	Alginate lyase
FGMG_005628-RA	5518.FGSG_03122P0	5.1e-234	816.6	Nectriaceae													Fungi	1FR7K@110618,21A6C@147550,2EHH0@1,2SN5B@2759,3AIPJ@33154,3PBUI@4751,3QV7G@4890,3TVUV@5125	NA|NA|NA	S	Right handed beta helix region
FGMG_007018-RA	101028.EKJ77465	9.5e-85	320.5	Ascomycota													Fungi	2D4U0@1,2SW9N@2759,3AUI1@33154,3PIG9@4751,3R64T@4890	NA|NA|NA
FGMG_009697-RA	5518.FGSG_06506P0	3.4e-105	388.3	Nectriaceae													Fungi	1FMRF@110618,21A3D@147550,2CHR4@1,2QQKA@2759,3A0KP@33154,3P27I@4751,3QVAR@4890,3TVFM@5125	NA|NA|NA	S	Lytic polysaccharide mono-oxygenase, cellulose-degrading
FGMG_011972-RA	5518.FGSG_11072P0	1.3e-98	366.3	Nectriaceae													Fungi	1FV8C@110618,21J4F@147550,29FCD@1,2RNHY@2759,38S7B@33154,3PTYQ@4751,3RDAI@4890,3TNZJ@5125	NA|NA|NA
FGMG_000023-RA	117187.FVEG_12281T0	2.2e-106	392.9	Nectriaceae													Fungi	1FVNZ@110618,21GX8@147550,2CU4Q@1,2RJ8W@2759,38NYG@33154,3PQTY@4751,3RAAK@4890,3TP7C@5125	NA|NA|NA
FGMG_002826-RA	5518.FGSG_02658P0	1.5e-176	625.5	Nectriaceae		GO:0005575,GO:0005576											Fungi	1FN7C@110618,21R8B@147550,2CN2D@1,2QTGS@2759,39JJY@33154,3Q3X3@4751,3RM0C@4890,3TKID@5125	NA|NA|NA	O	Glycosyl hydrolase family 45
FGMG_004708-RA	5518.FGSG_03968P0	5.8e-154	550.4	Nectriaceae													Fungi	1FP2R@110618,216YI@147550,2ECWD@1,2SING@2759,39WGW@33154,3NW4V@4751,3QPI0@4890,3TVKN@5125	NA|NA|NA	O	Glycosyl hydrolase family 61
FGMG_004714-RA	5518.FGSG_03960P0	4.6e-43	181	Nectriaceae													Fungi	1FVHT@110618,21GVI@147550,28IX6@1,2QR8U@2759,3905Z@33154,3PZS5@4751,3RIXH@4890,3TP47@5125	NA|NA|NA	S	Hydrophobins
FGMG_007175-RA	5518.FGSG_13504P0	3.8e-201	707.6	Nectriaceae													Fungi	1FV8D@110618,21KFG@147550,2CZPN@1,2SB4Z@2759,3AAZW@33154,3P73T@4751,3QYGH@4890,3TW2E@5125	NA|NA|NA
FGMG_010483-RA	5518.FGSG_05354P0	3.7e-151	541.6	Nectriaceae													Fungi	1FSGX@110618,21GJ1@147550,293JE@1,2RAG9@2759,3AWW0@33154,3PWWG@4751,3RFVY@4890,3TNN3@5125	NA|NA|NA
FGMG_012093-RA	5518.FGSG_11184P0	4.8e-251	873.2	Nectriaceae													Fungi	1FQ24@110618,21PM7@147550,2CN94@1,2QUKB@2759,39UQQ@33154,3P066@4751,3QNPK@4890,3TTHW@5125	NA|NA|NA	G	Belongs to the glycosyl hydrolase 5 (cellulase A) family
FGMG_003334-RA	5518.FGSG_10206P0	2.3e-76	291.6	Nectriaceae													Fungi	1FUNU@110618,21C7C@147550,29CWZ@1,2RK0U@2759,38PPT@33154,3PRII@4751,3RB0I@4890,3TJD8@5125	NA|NA|NA
FGMG_005350-RA	5518.FGSG_03379P0	4.2e-149	533.9	Nectriaceae			3.1.27.1	ko:K01166					ko00000,ko01000,ko03016				Fungi	1FM6T@110618,2165H@147550,38KSQ@33154,3NV66@4751,3QPQ4@4890,3TFI2@5125,KOG1642@1,KOG1642@2759	NA|NA|NA	A	Belongs to the RNase T2 family
FGMG_006952-RA	5518.FGSG_08094P0	3.6e-63	248.4	Nectriaceae													Fungi	1FYNX@110618,21IE4@147550,29ECN@1,2RMHM@2759,38R6Y@33154,3PSZU@4751,3RIW4@4890,3TRVH@5125	NA|NA|NA
FGMG_007073-RA	5518.FGSG_07988P0	3.6e-91	340.9	Nectriaceae		GO:0000003,GO:0000905,GO:0003006,GO:0005575,GO:0005576,GO:0007049,GO:0007275,GO:0008150,GO:0009653,GO:0009987,GO:0019953,GO:0019954,GO:0022402,GO:0022414,GO:0030154,GO:0030435,GO:0030582,GO:0030584,GO:0032501,GO:0032502,GO:0034293,GO:0043934,GO:0043935,GO:0044703,GO:0048468,GO:0048608,GO:0048646,GO:0048731,GO:0048856,GO:0048869,GO:0051321,GO:0051704,GO:0061458,GO:0070787,GO:0070790,GO:0075259,GO:…											Fungi	1FQKK@110618,21ANV@147550,2EIJU@1,2SNZ2@2759,3A41K@33154,3P438@4751,3QVT4@4890,3TMUQ@5125	NA|NA|NA	S	cell wall protein
FGMG_008260-RA	5518.FGSG_07794P0	2.1e-196	691.4	Nectriaceae			4.2.2.2	ko:K01728	ko00040,ko02024,map00040,map02024		R02361,R06240	RC00049,RC00705	ko00000,ko00001,ko01000				Fungi	1FT4M@110618,214UW@147550,2QR5B@2759,39USW@33154,3NXXT@4751,3QQYZ@4890,3TW8D@5125,COG3866@1	NA|NA|NA	G	Amb_all
FGMG_008293-RA	5518.FGSG_07766P0	5.7e-250	869.8	Nectriaceae													Fungi	1FMJY@110618,21D61@147550,2CHVX@1,2ST5S@2759,3AQFS@33154,3PFUZ@4751,3R282@4890,3TTMU@5125	NA|NA|NA
FGMG_001923-RA	5518.FGSG_01829P0	1.7e-231	808.1	Nectriaceae			5.1.3.3	ko:K01785	ko00010,ko00052,ko01100,ko01110,ko01120,ko01130,map00010,map00052,map01100,map01110,map01120,map01130	M00632	R01602,R10619	RC00563	ko00000,ko00001,ko00002,ko01000				Fungi	1FMBU@110618,216XE@147550,39TA3@33154,3NW79@4751,3QNS4@4890,3TH1W@5125,COG2017@1,KOG1604@2759	NA|NA|NA	G	Aldose 1-epimerase
FGMG_002134-RA	5518.FGSG_02015P0	2.5e-291	1007.3	Nectriaceae													Fungi	1FM64@110618,215F4@147550,39STH@33154,3NZBF@4751,3QNBI@4890,3TVGT@5125,COG2272@1,KOG4389@2759	NA|NA|NA	G	Belongs to the type-B carboxylesterase lipase family
FGMG_004913-RA	101028.EKJ68662	1.4e-140	505.8	Nectriaceae													Fungi	1FZ3R@110618,2175K@147550,2CXN2@1,2RYKG@2759,39SC1@33154,3NZAM@4751,3QRGY@4890,3TIHS@5125	NA|NA|NA	O	Pregnancy-associated plasma protein-A
FGMG_005620-RA	101028.EKJ77595	1.4e-79	302	Nectriaceae													Fungi	1FYK6@110618,21CSG@147550,29PC4@1,2RWPS@2759,3AVDK@33154,3PIA6@4751,3R5DM@4890,3TQQ7@5125	NA|NA|NA
FGMG_007785-RA	101028.EKJ73901	4.6e-94	350.5	Nectriaceae	NPC2	GO:0000322,GO:0000323,GO:0000324,GO:0000328,GO:0005575,GO:0005576,GO:0005622,GO:0005623,GO:0005737,GO:0005773,GO:0005775,GO:0006810,GO:0006869,GO:0008150,GO:0010876,GO:0015850,GO:0015918,GO:0031974,GO:0032365,GO:0032366,GO:0033036,GO:0043226,GO:0043227,GO:0043229,GO:0043231,GO:0043233,GO:0044422,GO:0044424,GO:0044437,GO:0044444,GO:0044446,GO:0044464,GO:0046907,GO:0051179,GO:0051234,GO:0051641,GO:…											Fungi	1FRSD@110618,219WV@147550,3A444@33154,3P3WJ@4751,3QW4K@4890,3TJ3G@5125,KOG4680@1,KOG4680@2759	NA|NA|NA	S	phosphatidylglycerol phosphatidylinositol transfer protein
FGMG_000005-RA	5518.FGSG_14010P0	2e-100	371.7	Sordariomycetes													Fungi	21DTM@147550,2EX4Y@1,2SYVI@2759,3AD4Y@33154,3P8HS@4751,3QZ6T@4890	NA|NA|NA
FGMG_000931-RA	5518.FGSG_00876P0	2.9e-235	820.8	Nectriaceae	TOS1	GO:0000271,GO:0000322,GO:0000323,GO:0000324,GO:0003674,GO:0003824,GO:0003843,GO:0005575,GO:0005618,GO:0005622,GO:0005623,GO:0005737,GO:0005773,GO:0005975,GO:0005976,GO:0006073,GO:0006074,GO:0006075,GO:0008150,GO:0008152,GO:0008194,GO:0009058,GO:0009059,GO:0009250,GO:0009272,GO:0009277,GO:0009987,GO:0010383,GO:0016051,GO:0016740,GO:0016757,GO:0016758,GO:0030312,GO:0033692,GO:0034406,GO:0034407,GO:…											Fungi	1FMCF@110618,2119E@147550,2CBPA@1,2QSI7@2759,39SJ2@33154,3NUXK@4751,3QKGF@4890,3TG8K@5125	NA|NA|NA	S	Glycine-rich protein domain (DUF2403)
FGMG_003930-RA	101028.EKJ71714	1.5e-109	402.1	Nectriaceae													Fungi	1FWVQ@110618,21CMU@147550,29D5E@1,2RK97@2759,3ANK9@33154,3PEUG@4751,3R08C@4890,3TPSX@5125	NA|NA|NA
FGMG_004775-RA	5518.FGSG_03908P0	5.2e-166	590.5	Nectriaceae		GO:0000272,GO:0003674,GO:0003824,GO:0005975,GO:0005976,GO:0008150,GO:0008152,GO:0009056,GO:0009057,GO:0009987,GO:0010393,GO:0016052,GO:0016829,GO:0016835,GO:0016837,GO:0017144,GO:0030570,GO:0042737,GO:0043170,GO:0044237,GO:0044238,GO:0044248,GO:0045488,GO:0045490,GO:0047490,GO:0071704,GO:1901575	4.2.2.2	ko:K01728	ko00040,ko02024,map00040,map02024		R02361,R06240	RC00049,RC00705	ko00000,ko00001,ko01000				Fungi	1FQA4@110618,2180C@147550,2S66G@2759,39UM1@33154,3NUJG@4751,3QSC7@4890,3TVRR@5125,COG3866@1	NA|NA|NA	G	Pectate lyase
FGMG_005391-RA	5518.FGSG_03348P0	6.8e-207	726.5	Nectriaceae			1.14.18.1	ko:K00505	ko00350,ko00950,ko00965,ko01100,ko01110,ko04916,map00350,map00950,map00965,map01100,map01110,map04916	M00042	R00731,R02078,R02363,R02383,R04693,R04884	RC00046,RC00150,RC00180	ko00000,ko00001,ko00002,ko01000				Fungi	1FN13@110618,21Q6Z@147550,29DZU@1,2RM4B@2759,39XMX@33154,3NX6H@4751,3RJF5@4890,3TTU2@5125	NA|NA|NA	S	Common central domain of tyrosinase
FGMG_007218-RA	5518.FGSG_09071P0	1.8e-146	525.8	Ascomycota													Fungi	2D4U0@1,2SW9N@2759,3AUI1@33154,3PIG9@4751,3R64T@4890	NA|NA|NA
FGMG_008275-RA	5127.CCT67685	3.3e-105	387.9	Nectriaceae													Fungi	1FRFS@110618,21976@147550,2EJFQ@1,2SPMP@2759,3A5TI@33154,3P61N@4751,3QT7W@4890,3TI6Q@5125	NA|NA|NA	S	GDSL-like Lipase/Acylhydrolase family
FGMG_009827-RA	5518.FGSG_12591P0	5.5e-92	344.4	Nectriaceae													Fungi	1FTV1@110618,21U6P@147550,290FT@1,2R7AW@2759,38N60@33154,3PXE1@4751,3RGEK@4890,3TRT3@5125	NA|NA|NA
FGMG_000136-RA	101028.EKJ76847	2.1e-13	82.8	Nectriaceae													Fungi	1FV1J@110618,21I2N@147550,29DUW@1,2RKZ9@2759,38QN5@33154,3PSFG@4751,3RBWN@4890,3TNX3@5125	NA|NA|NA
FGMG_001694-RA	5518.FGSG_01607P0	1.2e-213	748.8	Nectriaceae	pelA	GO:0000272,GO:0003674,GO:0003824,GO:0005575,GO:0005576,GO:0005975,GO:0005976,GO:0008150,GO:0008152,GO:0009056,GO:0009057,GO:0009987,GO:0010393,GO:0016052,GO:0016829,GO:0016835,GO:0016837,GO:0017144,GO:0042737,GO:0043170,GO:0044237,GO:0044238,GO:0044248,GO:0045488,GO:0045490,GO:0047490,GO:0071704,GO:1901575	4.2.2.10	ko:K01732					ko00000,ko01000				Fungi	1FPRN@110618,21404@147550,2BZ7G@1,2QXM6@2759,38DKY@33154,3NXF9@4751,3QNUJ@4890,3TVPD@5125	NA|NA|NA	G	pectin lyase
FGMG_002383-RA	101028.EKJ79587	4.5e-285	986.5	Nectriaceae													Fungi	1FW7S@110618,2179T@147550,39XVF@33154,3NZBQ@4751,3QS3I@4890,3TFTQ@5125,COG0277@1,KOG4730@2759	NA|NA|NA	V	D-arabinono-1,4-lactone oxidase
FGMG_003957-RA	5518.FGSG_04678P0	9.4e-219	765.8	Nectriaceae		GO:0000272,GO:0003674,GO:0003824,GO:0004553,GO:0004567,GO:0005975,GO:0005976,GO:0008150,GO:0008152,GO:0009056,GO:0009057,GO:0009987,GO:0010412,GO:0015923,GO:0016052,GO:0016787,GO:0016798,GO:0016985,GO:0016998,GO:0043170,GO:0044036,GO:0044237,GO:0044238,GO:0044247,GO:0044248,GO:0044260,GO:0044262,GO:0044264,GO:0044275,GO:0046355,GO:0071554,GO:0071704,GO:1901575	3.2.1.78	ko:K19355	ko00051,map00051		R01332	RC00467	ko00000,ko00001,ko01000				Fungi	1FQUE@110618,21QJG@147550,2QQFD@2759,38HX9@33154,3NZ51@4751,3RJX2@4890,3TU10@5125,COG3934@1	NA|NA|NA	G	Belongs to the glycosyl hydrolase 5 (cellulase A) family
FGMG_005095-RA	101028.EKJ68639	1.3e-42	179.9	Nectriaceae													Fungi	1FW1H@110618,21DNM@147550,28I5G@1,2QU7D@2759,38DZ0@33154,3P17B@4751,3QS74@4890,3TJZ8@5125	NA|NA|NA	S	Common central domain of tyrosinase
FGMG_009737-RA	101028.EKJ69709	4.5e-136	491.1	Nectriaceae													Fungi	1FN5T@110618,21MQS@147550,2D428@1,2STK8@2759,3A9ZU@33154,3P7NC@4751,3QYTD@4890,3TVH8@5125	NA|NA|NA
FGMG_009843-RA	5127.CCT67911	2.3e-10	71.2	Ascomycota													Fungi	2BQ63@1,2SFIT@2759,3ATTT@33154,3PGP4@4751,3R5XQ@4890	NA|NA|NA	S	Rapid ALkalinization Factor (RALF)
FGMG_000043-RA	101028.EKJ71992	9.9e-146	522.7	Nectriaceae													Fungi	1FKJ6@110618,2121S@147550,2BYKQ@1,2QSRM@2759,3A33C@33154,3P39B@4751,3QTSV@4890,3TKBI@5125	NA|NA|NA	S	Cupin
FGMG_000049-RA	5518.FGSG_00029P0	1e-75	289.3	Nectriaceae													Fungi	1FYPF@110618,21FMN@147550,2EQQ2@1,2STNY@2759,3A89X@33154,3P7UC@4751,3QXV6@4890,3TQSG@5125	NA|NA|NA
FGMG_000076-RA	5518.FGSG_00056P0	5.2e-89	333.6	Nectriaceae													Fungi	1FYJZ@110618,21TVZ@147550,29HJY@1,2RQSN@2759,38UJ0@33154,3PW5P@4751,3RF6I@4890,3TQQ1@5125	NA|NA|NA
FGMG_001157-RA	101028.EKJ70747	5.4e-53	214.5	Nectriaceae													Fungi	1FVDV@110618,21NC2@147550,3AW91@33154,3PZ8D@4751,3RID1@4890,3TP26@5125,COG0141@1,KOG4439@2759	NA|NA|NA	KL	histone H2A-H2B dimer displacement
FGMG_001235-RA	5518.FGSG_01169P0	1.6e-230	805.1	Sordariomycetes				ko:K14001	ko04141,map04141				ko00000,ko00001,ko03029				Fungi	21SPG@147550,2CZKV@1,2SAUP@2759,39QYV@33154,3Q6Y3@4751,3RPRJ@4890	NA|NA|NA
FGMG_001857-RA	5518.FGSG_01764P0	7.4e-72	276.6	Nectriaceae													Fungi	1FV9D@110618,21BWB@147550,2CKD5@1,2SXFR@2759,3ASAX@33154,3PGZX@4751,3R62Z@4890,3TN4M@5125	NA|NA|NA
FGMG_002842-RA	101028.EKJ79450	2.8e-44	184.5	Nectriaceae													Fungi	1FVBK@110618,21AS1@147550,2D61Y@1,2T0FS@2759,3ATF5@33154,3PH1V@4751,3QWUS@4890,3TNK8@5125	NA|NA|NA
FGMG_005145-RA	101028.EKJ68905	2e-160	571.6	Hypocreales													Fungi	21UDB@147550,2BWA7@1,2RMXT@2759,38RM1@33154,3PTDB@4751,3RCT6@4890,3TN3Z@5125	NA|NA|NA
FGMG_005187-RA	5518.FGSG_03529P0	6e-179	633.3	Nectriaceae			3.2.1.39,3.2.1.58	ko:K01199,ko:K01210	ko00500,map00500		R00308,R03115	RC00467	ko00000,ko00001,ko00537,ko01000		GH17		Fungi	1FP25@110618,218T7@147550,2QQE6@2759,38HGU@33154,3NW21@4751,3QNSF@4890,3TP28@5125,COG5309@1	NA|NA|NA	G	Belongs to the glycosyl hydrolase 17 family
FGMG_005325-RA	5518.FGSG_03402P0	1.3e-262	911.8	Nectriaceae			3.1.3.2	ko:K01078	ko00730,ko00740,ko01100,map00730,map00740,map01100		R00548,R02135	RC00017	ko00000,ko00001,ko01000				Fungi	1FKK0@110618,2139Z@147550,38FEP@33154,3NYU2@4751,3QQKG@4890,3THH6@5125,KOG1382@1,KOG1382@2759	NA|NA|NA	S	histidine acid phosphatase
FGMG_008911-RA	5518.FGSG_07207P0	6.7e-177	626.7	Nectriaceae													Fungi	1FT3P@110618,218J2@147550,2E2FM@1,2S9PF@2759,39YHJ@33154,3P1F3@4751,3QN7Y@4890,3TJ3T@5125	NA|NA|NA	G	Belongs to the glycosyl hydrolase 43 family
FGMG_009839-RA	5518.FGSG_04736P0	8.7e-223	779.2	Nectriaceae													Fungi	1FSXZ@110618,21PF3@147550,2QQJW@2759,38HI6@33154,3P0AJ@4751,3QUK9@4890,3TTDY@5125,COG4638@1	NA|NA|NA	P	Rieske [2Fe-2S] domain
FGMG_010916-RA	5518.FGSG_05776P0	5.9e-89	334.7	Nectriaceae													Fungi	1FVNC@110618,21GX0@147550,2E5Q3@1,2SCH0@2759,38V4C@33154,3P7RC@4751,3R78K@4890,3TP70@5125	NA|NA|NA
FGMG_011900-RA	5518.FGSG_10998P0	8.3e-287	992.3	Nectriaceae													Fungi	1FPFZ@110618,211K5@147550,2QVGN@2759,38CUN@33154,3NX27@4751,3QMD9@4890,3TM7X@5125,COG0277@1	NA|NA|NA	C	Belongs to the oxygen-dependent FAD-linked oxidoreductase family
FGMG_012073-RA	5518.FGSG_11166P0	1e-181	642.9	Nectriaceae													Fungi	1FVNZ@110618,21GX8@147550,2CU4Q@1,2RJ8W@2759,38NYG@33154,3PQTY@4751,3RAAK@4890,3TP7C@5125	NA|NA|NA
FGMG_002305-RA	5518.FGSG_02202P0	7.3e-162	576.6	Nectriaceae													Fungi	1FP01@110618,2141G@147550,2A2M4@1,2RY3D@2759,39Z1J@33154,3NYCR@4751,3QMVF@4890,3TDPF@5125	NA|NA|NA	O	Glycosyl hydrolase family 61
FGMG_004133-RA	101028.EKJ76089	5e-248	863.2	Nectriaceae													Fungi	1FQ5R@110618,216D5@147550,39SQQ@33154,3NZCJ@4751,3QQ4H@4890,3TM0B@5125,COG2939@1,KOG1282@2759	NA|NA|NA	O	Belongs to the peptidase S10 family
FGMG_004417-RA	101028.EKJ71085	1e-133	482.6	Nectriaceae													Fungi	1FNCK@110618,2183W@147550,2AIDZ@1,2RZ4I@2759,3A2CP@33154,3P2RE@4751,3QTIK@4890,3TM9D@5125	NA|NA|NA
FGMG_004616-RA	101028.EKJ74467	9.5e-272	942.2	Nectriaceae				ko:K13690					ko00000,ko01000,ko01003		GT69		Fungi	1FN14@110618,21QWA@147550,28J03@1,2S1GT@2759,39J0G@33154,3Q3DA@4751,3RKEP@4890,3TTSR@5125	NA|NA|NA	G	Cryptococcal mannosyltransferase 1
FGMG_005185-RA	5518.FGSG_03531P0	8.1e-201	706.1	Nectriaceae			1.14.18.1	ko:K00505	ko00350,ko00950,ko00965,ko01100,ko01110,ko04916,map00350,map00950,map00965,map01100,map01110,map04916	M00042	R00731,R02078,R02363,R02383,R04693,R04884	RC00046,RC00150,RC00180	ko00000,ko00001,ko00002,ko01000				Fungi	1FKQ0@110618,2147S@147550,29DZU@1,2S31Y@2759,39YC6@33154,3NYT3@4751,3R0V9@4890,3TSEA@5125	NA|NA|NA	S	Common central domain of tyrosinase
FGMG_006238-RA	101028.EKJ69793	5.3e-51	207.6	Nectriaceae													Fungi	1FUPG@110618,219YP@147550,2CZS2@1,2SBG2@2759,3A3YX@33154,3P46V@4751,3QWTR@4890,3TIJB@5125	NA|NA|NA
FGMG_007057-RA	5518.FGSG_08002P0	3e-243	847.4	Nectriaceae													Fungi	1FU65@110618,2190C@147550,28M9A@1,2QTSJ@2759,39U6W@33154,3NZTY@4751,3QR1Z@4890,3TWFA@5125	NA|NA|NA
FGMG_007773-RA	5518.FGSG_09570P0	2.9e-98	364.4	Nectriaceae													Fungi	1FV00@110618,21CG3@147550,2E8HP@1,2SEZR@2759,3AC57@33154,3P91C@4751,3R022@4890,3TNWP@5125	NA|NA|NA	S	Podospora anserina S mat genomic DNA chromosome
FGMG_008307-RA	5518.FGSG_07755P0	4.1e-55	220.3	Nectriaceae													Fungi	1FV9E@110618,21CVE@147550,2EXG2@1,2SZ51@2759,3ABEY@33154,3P9RU@4751,3R0GV@4890,3TP04@5125	NA|NA|NA
FGMG_008942-RA	5518.FGSG_07180P0	9.4e-206	722.6	Nectriaceae	tigA	GO:0003674,GO:0003756,GO:0003824,GO:0005488,GO:0005515,GO:0005575,GO:0005622,GO:0005623,GO:0005737,GO:0005783,GO:0006457,GO:0006950,GO:0006979,GO:0008150,GO:0008152,GO:0009987,GO:0012505,GO:0015035,GO:0015036,GO:0016491,GO:0016667,GO:0016853,GO:0016860,GO:0016864,GO:0033554,GO:0034599,GO:0034975,GO:0034976,GO:0042221,GO:0043226,GO:0043227,GO:0043229,GO:0043231,GO:0044424,GO:0044444,GO:0044464,GO:…	5.3.4.1	ko:K09584	ko04141,map04141				ko00000,ko00001,ko01000,ko03110,ko04131				Fungi	1FP88@110618,21199@147550,38DXF@33154,3NY0R@4751,3QPNH@4890,3TCQM@5125,COG0526@1,KOG0191@2759	NA|NA|NA	O	Belongs to the protein disulfide isomerase family
FGMG_010894-RA	5518.FGSG_05757P0	1.1e-158	565.8	Nectriaceae	CRH1	GO:0000131,GO:0003674,GO:0003824,GO:0005575,GO:0005576,GO:0005618,GO:0005622,GO:0005623,GO:0005886,GO:0005975,GO:0005976,GO:0006022,GO:0006030,GO:0006037,GO:0006040,GO:0006807,GO:0008150,GO:0008152,GO:0009277,GO:0009986,GO:0009987,GO:0010383,GO:0016020,GO:0016043,GO:0016740,GO:0016757,GO:0017144,GO:0030312,GO:0030445,GO:0030446,GO:0031224,GO:0031225,GO:0031226,GO:0031505,GO:0043170,GO:0044036,GO:…	3.2.1.73	ko:K01216					ko00000,ko01000				Fungi	1FMAP@110618,21PAX@147550,2QQ71@2759,398QH@33154,3NUG7@4751,3QPFI@4890,3TTBR@5125,COG2273@1	NA|NA|NA	O	to cell wall glucanosyltransferase
FGMG_012248-RA	5518.FGSG_11318P0	1.7e-81	308.5	Nectriaceae													Fungi	1FZ9G@110618,21PRT@147550,2ERAQ@1,2SU56@2759,3ACT3@33154,3P8IB@4751,3R0QR@4890,3TT11@5125	NA|NA|NA	S	Pathogen effector; putative necrosis-inducing factor
FGMG_002376-RA	101028.EKJ79580	1.5e-247	861.7	Nectriaceae			2.1.1.22	ko:K19787	ko00340,map00340		R02144	RC00003,RC00333	ko00000,ko00001,ko01000				Fungi	1FPZ7@110618,21QT4@147550,38H1C@33154,3Q37X@4751,3RK9A@4890,3TGDB@5125,KOG2798@1,KOG2798@2759	NA|NA|NA	G	N2227
FGMG_004879-RA	5127.CCT63206	2.3e-57	228	Nectriaceae													Fungi	1FYM5@110618,21TW4@147550,2BYMV@1,2RKRU@2759,38QEH@33154,3PS8B@4751,3RBPX@4890,3TQQU@5125	NA|NA|NA
FGMG_005101-RA	5518.FGSG_03612P0	1.2e-149	535.8	Nectriaceae													Fungi	1FX1P@110618,21AER@147550,29ISC@1,2SHKU@2759,3A0K7@33154,3P24B@4751,3QTKD@4890,3TPUB@5125	NA|NA|NA	O	GDSL-like Lipase/Acylhydrolase
FGMG_005660-RA	101028.EKJ77632	5.9e-285	986.1	Nectriaceae													Fungi	1FT2W@110618,215V9@147550,39STH@33154,3NZBF@4751,3QNBI@4890,3TUD5@5125,COG2272@1,KOG4389@2759	NA|NA|NA	G	Belongs to the type-B carboxylesterase lipase family
FGMG_005840-RA	5518.FGSG_02935P0	7.3e-52	209.5	Nectriaceae													Fungi	1FYSH@110618,21TX6@147550,2EP9B@1,2RNKG@2759,3ATX1@33154,3PHKY@4751,3R50K@4890,3TQUK@5125	NA|NA|NA
FGMG_008659-RA	5518.FGSG_07424P0	5.4e-179	634	Nectriaceae													Fungi	1FSII@110618,21BMJ@147550,2ENBW@1,2SRTS@2759,3A7EJ@33154,3P5PY@4751,3QWDR@4890,3TNHA@5125	NA|NA|NA
FGMG_009870-RA	5518.FGSG_04768P0	5.2e-139	500.4	Nectriaceae													Fungi	1FTUZ@110618,21364@147550,2S1W9@2759,39VMF@33154,3P19Z@4751,3QS20@4890,3TEHW@5125,COG2273@1	NA|NA|NA	O	to endo-1,3(4)-beta-glucanase
FGMG_010467-RA	5518.FGSG_05341P0	4.4e-103	380.6	Nectriaceae													Fungi	1FUK3@110618,21BDY@147550,2C7I3@1,2RK19@2759,38PQ6@33154,3PRIY@4751,3RB0Z@4890,3TJ53@5125	NA|NA|NA	S	Pathogen effector; putative necrosis-inducing factor
FGMG_010988-RA	5518.FGSG_05842P0	1.2e-241	842	Nectriaceae													Fungi	1FPG7@110618,217UW@147550,29GQM@1,2RPX4@2759,3AGDI@33154,3PC83@4751,3QTS3@4890,3THQP@5125	NA|NA|NA	S	Domain of unknown function (DUF4419)
FGMG_000694-RA	5518.FGSG_00642P0	1.7e-137	496.1	Nectriaceae													Fungi	1FSZ3@110618,21R4R@147550,2AX57@1,2RYN9@2759,39JW6@33154,3Q48E@4751,3R3GB@4890,3TFN7@5125	NA|NA|NA	S	extracellular protein
FGMG_002206-RA	5518.FGSG_02085P0	3.1e-173	614.8	Nectriaceae													Fungi	1FM0F@110618,21J88@147550,29FGQ@1,2RNND@2759,38SBX@33154,3PU34@4751,3RDEE@4890,3TVDG@5125	NA|NA|NA
FGMG_002527-RA	5518.FGSG_02386P0	2.9e-142	511.1	Nectriaceae	plyE	GO:0000272,GO:0003674,GO:0003824,GO:0005975,GO:0005976,GO:0008150,GO:0008152,GO:0009056,GO:0009057,GO:0009987,GO:0010393,GO:0016052,GO:0016829,GO:0016835,GO:0016837,GO:0017144,GO:0030570,GO:0042737,GO:0043170,GO:0044237,GO:0044238,GO:0044248,GO:0045488,GO:0045490,GO:0071704,GO:1901575	4.2.2.2	ko:K01728	ko00040,ko02024,map00040,map02024		R02361,R06240	RC00049,RC00705	ko00000,ko00001,ko01000				Fungi	1FQJX@110618,215XU@147550,2AA6V@1,2QU39@2759,39MQ9@33154,3NWJ0@4751,3QQJ3@4890,3TVSP@5125	NA|NA|NA	G	Pectate lyase
FGMG_004056-RA	101028.EKJ73813	9.3e-68	262.7	Nectriaceae													Fungi	1FUMR@110618,21B7F@147550,2C40I@1,2SPD0@2759,3A76I@33154,3P63W@4751,3QY12@4890,3TJ69@5125	NA|NA|NA
FGMG_004646-RA	5518.FGSG_04029P0	4.5e-176	623.6	Nectriaceae													Fungi	1FQ44@110618,213IJ@147550,2C4CM@1,2QPY1@2759,38U7J@33154,3NYZS@4751,3QQGX@4890,3TCVZ@5125	NA|NA|NA
FGMG_005190-RA	101028.EKJ67654	4.4e-197	693.7	Nectriaceae													Fungi	1FMGZ@110618,211FH@147550,28WCZ@1,2R351@2759,39R5U@33154,3NXQW@4751,3QNDX@4890,3TVEU@5125	NA|NA|NA	S	Parallel beta-helix repeats
FGMG_006782-RA	5518.FGSG_08265P0	3e-261	907.1	Nectriaceae			3.2.1.75	ko:K22277					ko00000,ko01000		GH5		Fungi	1FMZK@110618,212RZ@147550,2RBRB@2759,38DH7@33154,3Q4PD@4751,3RMYN@4890,3TG0J@5125,COG2730@1	NA|NA|NA	G	Belongs to the glycosyl hydrolase 5 (cellulase A) family
FGMG_008183-RA	5518.FGSG_07866P0	1.5e-258	898.3	Nectriaceae													Fungi	1FM4F@110618,211C9@147550,39S6M@33154,3NZZU@4751,3QKQJ@4890,3TH07@5125,COG2866@1,KOG2650@2759	NA|NA|NA	O	Zn_pept
FGMG_008648-RA	5518.FGSG_07435P0	1.8e-66	259.6	Nectriaceae													Fungi	1FUYG@110618,21J7U@147550,2CUQB@1,2RNMT@2759,38SBF@33154,3PU2P@4751,3RDDY@4890,3TNWB@5125	NA|NA|NA
FGMG_012245-RA	5518.FGSG_11315P0	1.4e-141	509.6	Nectriaceae													Fungi	1FZ5J@110618,21DUE@147550,2CEZU@1,2QTC3@2759,38FG6@33154,3NW04@4751,3QJU8@4890,3TSQI@5125	NA|NA|NA
FGMG_001872-RA	5518.FGSG_01778P0	1.5e-146	525.4	Nectriaceae													Fungi	1FYTI@110618,21G0U@147550,2F15G@1,2T277@2759,3ASS1@33154,3PH18@4751,3R0AR@4890,3TQVF@5125	NA|NA|NA
FGMG_002854-RA	5518.FGSG_02686P0	5.4e-166	590.1	Nectriaceae			3.1.27.1	ko:K01166					ko00000,ko01000,ko03016				Fungi	1FT84@110618,2165H@147550,38KSQ@33154,3NV66@4751,3QPQ4@4890,3TFI2@5125,KOG1642@1,KOG1642@2759	NA|NA|NA	A	Belongs to the RNase T2 family
FGMG_003522-RA	5518.FGSG_10390P0	3.7e-240	837	Nectriaceae	SCJ1	GO:0003674,GO:0005488,GO:0005515,GO:0005575,GO:0005622,GO:0005623,GO:0005737,GO:0005783,GO:0005788,GO:0005829,GO:0006457,GO:0006508,GO:0006511,GO:0006807,GO:0006950,GO:0006986,GO:0008150,GO:0008152,GO:0009056,GO:0009057,GO:0009987,GO:0010033,GO:0010243,GO:0010498,GO:0012505,GO:0019538,GO:0019941,GO:0030163,GO:0030433,GO:0030544,GO:0031072,GO:0031974,GO:0033554,GO:0034620,GO:0034975,GO:0034976,GO:…		ko:K14002	ko04141,map04141				ko00000,ko00001				Fungi	1FKIW@110618,215T2@147550,38GG3@33154,3NU15@4751,3QJJ1@4890,3THN1@5125,COG0484@1,KOG0712@2759	NA|NA|NA	O	DnaJ central domain
FGMG_004017-RA	101028.EKJ71635	8.9e-52	209.1	Nectriaceae													Fungi	1FV3E@110618,21FRM@147550,2BZ47@1,2TDP5@2759,3AR7P@33154,3PFGR@4751,3R4MF@4890,3TNXM@5125	NA|NA|NA
FGMG_005585-RA	5127.CCT63198	1.1e-82	312.8	Nectriaceae													Fungi	1FTSA@110618,21BTA@147550,2E44J@1,2SB2X@2759,3A4TS@33154,3P43J@4751,3QXQS@4890,3TWCT@5125	NA|NA|NA
FGMG_005875-RA	5518.FGSG_02903P0	1.1e-93	349.7	Nectriaceae													Fungi	1FVSC@110618,21T5V@147550,29GET@1,2RPKZ@2759,38P05@33154,3PQVM@4751,3RACF@4890,3TP9K@5125	NA|NA|NA
FGMG_005883-RA	101028.EKJ73069	7.2e-114	416.8	Ascomycota													Fungi	2EBPP@1,2SHR1@2759,3A13C@33154,3NYXB@4751,3QRGW@4890	NA|NA|NA
FGMG_006793-RA	5518.FGSG_08253P0	7.3e-244	849.4	Nectriaceae			3.2.1.4	ko:K19357	ko00500,ko01100,map00500,map01100		R11307,R11308		ko00000,ko00001,ko01000		GH7		Fungi	1FNKB@110618,214AA@147550,2C38W@1,2SJT6@2759,39UAD@33154,3NZ99@4751,3QK61@4890,3TKN4@5125	NA|NA|NA	G	Belongs to the glycosyl hydrolase 7 (cellulase C) family
FGMG_006956-RA	101028.EKJ72289	7.2e-41	173.3	Nectriaceae													Fungi	1FVPQ@110618,21GXN@147550,2RJ9E@2759,38NYY@33154,3PQUF@4751,3RAB5@4890,3TP7W@5125,COG0666@1	NA|NA|NA	S	protein ubiquitination
FGMG_006960-RA	101028.EKJ72293	3.2e-68	264.2	Ascomycota													Fungi	2EZXW@1,2T16F@2759,3ASMH@33154,3PH2K@4751,3R673@4890	NA|NA|NA
FGMG_006973-RA	140110.NechaP122668	2.7e-16	91.3	Nectriaceae													Fungi	1FYSH@110618,21TX6@147550,2EP9B@1,2RNKG@2759,3ATX1@33154,3PHKY@4751,3R50K@4890,3TQUK@5125	NA|NA|NA
FGMG_007010-RA	101028.EKJ77457	1e-230	805.8	Sordariomycetes													Fungi	21DYI@147550,2EGSF@1,2SMMT@2759,3ABUX@33154,3P9EH@4751,3R0C0@4890	NA|NA|NA	G	Belongs to the glycosyl hydrolase 43 family
FGMG_009875-RA	5518.FGSG_04773P0	4e-190	670.6	Nectriaceae													Fungi	1FZ6W@110618,21DR9@147550,2A2M4@1,2RY3D@2759,39Z5W@33154,3NZBY@4751,3QMUC@4890,3TSUN@5125	NA|NA|NA	G	Glycosyl hydrolase family 61
FGMG_011915-RA	5518.FGSG_11011P0	1.7e-201	708.4	Nectriaceae		GO:0000272,GO:0003674,GO:0003824,GO:0004553,GO:0004650,GO:0005575,GO:0005576,GO:0005975,GO:0005976,GO:0007124,GO:0008150,GO:0008152,GO:0009056,GO:0009057,GO:0009987,GO:0010393,GO:0016049,GO:0016052,GO:0016787,GO:0016798,GO:0017144,GO:0030447,GO:0040007,GO:0042737,GO:0043170,GO:0044182,GO:0044237,GO:0044238,GO:0044248,GO:0045488,GO:0045490,GO:0070783,GO:0071704,GO:1901575	3.2.1.15,3.2.1.67	ko:K01184,ko:K01213	ko00040,ko01100,map00040,map01100	M00081	R01982,R02360,R07413	RC00049	ko00000,ko00001,ko00002,ko01000				Fungi	1FPI1@110618,212MB@147550,2QTAW@2759,39SYV@33154,3P03X@4751,3QM7B@4890,3THPN@5125,COG5434@1	NA|NA|NA	G	precursor
FGMG_011932-RA	5518.FGSG_11036P0	1e-161	575.9	Nectriaceae													Fungi	1FZCX@110618,21PEG@147550,2QU71@2759,39T0C@33154,3NYZ8@4751,3QSNK@4890,3TM6Q@5125,COG3509@1	NA|NA|NA	O	Esterase PHB depolymerase
FGMG_012038-RA	5518.FGSG_11135P0	2.9e-38	164.1	Nectriaceae													Fungi	1FV9E@110618,21CVE@147550,2EXG2@1,2SZ51@2759,3ABEY@33154,3P9RU@4751,3R0GV@4890,3TP04@5125	NA|NA|NA
FGMG_000048-RA	5518.FGSG_00028P0	3.8e-156	557.4	Nectriaceae													Fungi	1FMJ7@110618,2175K@147550,2CXN2@1,2RYKG@2759,39SC1@33154,3NZAM@4751,3QRGY@4890,3TMKQ@5125	NA|NA|NA	O	to metalloprotease 1 precursor
FGMG_000078-RA	140110.NechaP84398	4.6e-07	62	Nectriaceae													Fungi	1FYIK@110618,21HX8@147550,29DKR@1,2RKQX@2759,38QDI@33154,3PS7C@4751,3RBNW@4890,3TQPA@5125	NA|NA|NA
FGMG_000905-RA	101028.EKJ68153	1.1e-26	125.2	Nectriaceae													Fungi	1FYKY@110618,21CG8@147550,2C6YN@1,2RNF1@2759,38S4D@33154,3PTVX@4751,3RD7U@4890,3TJFZ@5125	NA|NA|NA
FGMG_002233-RA	5518.FGSG_02110P0	2e-87	328.2	Nectriaceae													Fungi	1FUZX@110618,21C6G@147550,2C53C@1,2STCJ@2759,3AA5Q@33154,3P7C3@4751,3QZ2A@4890,3TMYM@5125	NA|NA|NA
FGMG_002399-RA	101028.EKJ79603	4.1e-98	364.4	Nectriaceae													Fungi	1FV1V@110618,21T1H@147550,2CKU1@1,2R753@2759,38K81@33154,3PN3C@4751,3RPUD@4890,3TNX9@5125	NA|NA|NA
FGMG_002477-RA	393283.XP_007828033.1	5.1e-82	311.6	Sordariomycetes													Fungi	216BJ@147550,2CY1K@1,2S1BG@2759,38GSZ@33154,3NZUI@4751,3QSTX@4890	NA|NA|NA	S	Alpha beta hydrolase
FGMG_003877-RA	5518.FGSG_11517P0	5.6e-80	304.3	Nectriaceae			1.14.18.1	ko:K00505	ko00350,ko00950,ko00965,ko01100,ko01110,ko04916,map00350,map00950,map00965,map01100,map01110,map04916	M00042	R00731,R02078,R02363,R02383,R04693,R04884	RC00046,RC00150,RC00180	ko00000,ko00001,ko00002,ko01000				Fungi	1FRBP@110618,217JB@147550,28J2M@1,2QRET@2759,39UHZ@33154,3NXHW@4751,3QR9K@4890,3TIFH@5125	NA|NA|NA	S	Common central domain of tyrosinase
FGMG_004305-RA	5518.FGSG_04345P0	2.4e-239	834.3	Nectriaceae													Fungi	1FRXU@110618,21Q4R@147550,3A9K6@33154,3P857@4751,3QZI1@4890,3TTSG@5125,KOG1339@1,KOG1339@2759	NA|NA|NA	O	Belongs to the peptidase A1 family
FGMG_005864-RA	5518.FGSG_02914P0	4.2e-181	640.6	Sordariomycetes													Fungi	21FBQ@147550,2CD5Y@1,2TCI1@2759,3AP7K@33154,3PEZM@4751,3R3WN@4890	NA|NA|NA
FGMG_006927-RA	5518.FGSG_08122P0	1.2e-105	389	Nectriaceae		GO:0000003,GO:0000905,GO:0003006,GO:0005575,GO:0005576,GO:0007049,GO:0007275,GO:0008150,GO:0009653,GO:0009987,GO:0019953,GO:0019954,GO:0022402,GO:0022414,GO:0030154,GO:0030435,GO:0030582,GO:0030584,GO:0032501,GO:0032502,GO:0034293,GO:0043934,GO:0043935,GO:0044703,GO:0048468,GO:0048608,GO:0048646,GO:0048731,GO:0048856,GO:0048869,GO:0051321,GO:0051704,GO:0061458,GO:0070787,GO:0070790,GO:0075259,GO:…											Fungi	1FY4B@110618,21ANV@147550,2EIJU@1,2SNZ2@2759,3A41K@33154,3P438@4751,3QVT4@4890,3TMUQ@5125	NA|NA|NA	S	cell wall protein
FGMG_008100-RA	101028.EKJ69036	8.9e-193	679.5	Nectriaceae	MP65	GO:0000003,GO:0000322,GO:0000323,GO:0000324,GO:0000746,GO:0000747,GO:0003674,GO:0003676,GO:0003723,GO:0003729,GO:0003824,GO:0004553,GO:0005488,GO:0005575,GO:0005576,GO:0005618,GO:0005622,GO:0005623,GO:0005737,GO:0005773,GO:0005783,GO:0006950,GO:0007154,GO:0007155,GO:0008150,GO:0009267,GO:0009268,GO:0009277,GO:0009405,GO:0009605,GO:0009607,GO:0009628,GO:0009986,GO:0009987,GO:0009991,GO:0012505,GO:…	3.2.1.58	ko:K01210	ko00500,map00500		R00308,R03115	RC00467	ko00000,ko00001,ko01000				Fungi	1FS8M@110618,212RC@147550,2QTKT@2759,38F4C@33154,3NWQI@4751,3QQKC@4890,3THTM@5125,COG5309@1	NA|NA|NA	G	Belongs to the glycosyl hydrolase 17 family
FGMG_008267-RA	101028.EKJ71900	8e-154	549.7	Nectriaceae													Fungi	1FQH3@110618,218Q1@147550,2D3PD@1,2SS8U@2759,3A58J@33154,3P433@4751,3R2CA@4890,3TKVW@5125	NA|NA|NA	S	Necrosis inducing protein (NPP1)
FGMG_008382-RA	5518.FGSG_13189P0	1.1e-272	945.3	Nectriaceae													Fungi	1FPYG@110618,2184J@147550,2C3KP@1,2SHWK@2759,39T1S@33154,3NY2E@4751,3QPUI@4890,3TMD1@5125	NA|NA|NA	G	Belongs to the glycosyl hydrolase 43 family
FGMG_011193-RA	5518.FGSG_06036P0	2e-165	589	Nectriaceae													Fungi	1FXQY@110618,21I8C@147550,2EYF2@1,2SZYG@2759,38ZVA@33154,3PZFI@4751,3RIK8@4890,3TRGD@5125	NA|NA|NA
FGMG_011241-RA	5518.FGSG_06087P0	1.4e-162	579.3	Nectriaceae													Fungi	1FRK1@110618,216RH@147550,2AX57@1,2S005@2759,38DPS@33154,3P0B9@4751,3QT24@4890,3TGRK@5125	NA|NA|NA
FGMG_011643-RA	101028.EKJ78526	1.7e-113	416	Nectriaceae													Fungi	1FPUF@110618,21R9V@147550,2D6IM@1,2T25C@2759,3APEJ@33154,3PEFT@4751,3QXUJ@4890,3TIYT@5125	NA|NA|NA
FGMG_000286-RA	5518.FGSG_00260P0	2.6e-38	164.1	Nectriaceae													Fungi	1FYJG@110618,21C2R@147550,29DZF@1,2RM3Y@2759,3AUBE@33154,3PI7T@4751,3QZXH@4890,3TJ87@5125	NA|NA|NA
FGMG_003304-RA	5518.FGSG_10184P0	9.1e-169	599.4	Nectriaceae													Fungi	1FNFB@110618,216G8@147550,29MJ0@1,2RUV2@2759,39W7H@33154,3NV1P@4751,3QP3S@4890,3TGGR@5125	NA|NA|NA	S	PLC-like phosphodiesterase
FGMG_003825-RA	5518.FGSG_10670P0	3.7e-128	464.2	Nectriaceae			3.1.1.72	ko:K05972					ko00000,ko01000				Fungi	1FSX6@110618,21840@147550,2CN9D@1,2QUMZ@2759,39R68@33154,3NZ9I@4751,3QPB6@4890,3TKDK@5125	NA|NA|NA	S	PE-PPE domain
FGMG_004934-RA	101028.EKJ76341	1.9e-299	1034.2	Nectriaceae			3.4.16.5	ko:K13289	ko04142,ko04614,map04142,map04614				ko00000,ko00001,ko01000,ko01002,ko03110,ko04131,ko04147				Fungi	1FNU3@110618,218JP@147550,39VHV@33154,3NVP7@4751,3QSSD@4890,3TSAT@5125,COG2939@1,KOG1282@2759	NA|NA|NA	O	Belongs to the peptidase S10 family
FGMG_005036-RA	5518.FGSG_03674P0	9.4e-129	466.1	Nectriaceae													Fungi	1FYZR@110618,21AHU@147550,2BHNK@1,2S1C9@2759,3A3MP@33154,3P4AM@4751,3QW5X@4890,3TM04@5125	NA|NA|NA	S	Pfam:DUF4237
FGMG_006610-RA	5518.FGSG_08423P0	2.6e-266	924.1	Nectriaceae				ko:K09704					ko00000				Fungi	1FPHE@110618,216N3@147550,2QR7D@2759,38C0G@33154,3NWZ6@4751,3QPDT@4890,3THX9@5125,COG3538@1	NA|NA|NA	S	Metal-independent alpha-mannosidase (GH125)
FGMG_007003-RA	5518.FGSG_08048P0	2.9e-273	947.2	Nectriaceae													Fungi	1FRQX@110618,2121F@147550,28IFH@1,2QQSB@2759,3945J@33154,3NUT8@4751,3QKGN@4890,3TDGT@5125	NA|NA|NA	S	LVIVD repeat
FGMG_008875-RA	5518.FGSG_07238P0	1.4e-155	555.8	Nectriaceae													Fungi	1FQAT@110618,2169K@147550,39W0F@33154,3NYWS@4751,3QR98@4890,3TEWU@5125,KOG4157@1,KOG4157@2759	NA|NA|NA	GO	present in yeast cell wall integrity and stress response component proteins
FGMG_009658-RA	5518.FGSG_06545P0	5.9e-285	986.1	Nectriaceae													Fungi	1FPUS@110618,211AA@147550,38GBP@33154,3NXTI@4751,3QMQ7@4890,3TEAU@5125,COG2234@1,KOG2195@2759	NA|NA|NA	O	Belongs to the peptidase M28 family
FGMG_009703-RA	5518.FGSG_06497P0	2.2e-215	754.6	Nectriaceae													Fungi	1FU5S@110618,214TY@147550,2EDEY@1,2SJ2N@2759,39UZF@33154,3P0HD@4751,3QQDE@4890,3TG2Z@5125	NA|NA|NA	S	Serine aminopeptidase, S33
FGMG_009835-RA	5518.FGSG_04732P0	4.6e-293	1013.1	Nectriaceae													Fungi	1FQI4@110618,217ZY@147550,39VMK@33154,3NVMI@4751,3QMBZ@4890,3TKPN@5125,COG0277@1,KOG1231@2759	NA|NA|NA	C	FAD binding domain
FGMG_009903-RA	101028.EKJ75889	7e-61	240	Nectriaceae													Fungi	1FY9I@110618,21IBK@147550,2982Q@1,2RF36@2759,38K9R@33154,3PN51@4751,3R74T@4890,3TRQ8@5125	NA|NA|NA
FGMG_010081-RA	5518.FGSG_04980P0	2.3e-176	624.8	Nectriaceae		GO:0002084,GO:0003674,GO:0003824,GO:0005575,GO:0005622,GO:0005623,GO:0005737,GO:0005783,GO:0005789,GO:0006464,GO:0006486,GO:0006487,GO:0006629,GO:0006643,GO:0006665,GO:0006807,GO:0006873,GO:0006885,GO:0007035,GO:0008150,GO:0008152,GO:0008474,GO:0008610,GO:0009056,GO:0009057,GO:0009058,GO:0009059,GO:0009100,GO:0009101,GO:0009987,GO:0012505,GO:0016020,GO:0016021,GO:0016462,GO:0016787,GO:0016788,GO:…	3.1.2.22	ko:K01074	ko00062,ko01100,ko01212,ko04142,map00062,map01100,map01212,map04142		R01274	RC00004,RC00014	ko00000,ko00001,ko01000,ko01004				Fungi	1FSZQ@110618,214HW@147550,38HI2@33154,3NWUT@4751,3QPSG@4890,3TEZN@5125,COG1075@1,KOG2541@2759	NA|NA|NA	IO	to palmitoyl-protein thioesterase precursor
FGMG_011877-RA	5518.FGSG_10972P0	1.1e-70	273.9	Nectriaceae													Fungi	1FV6S@110618,21TVE@147550,29DJW@1,2RKPZ@2759,38QCU@33154,3PS6M@4751,3RBN8@4890,3TNYT@5125	NA|NA|NA
FGMG_011995-RA	101028.EKJ72365	7.7e-134	483	Nectriaceae													Fungi	1FMZN@110618,21EGP@147550,28K6I@1,2QSM3@2759,39WFJ@33154,3PAF0@4751,3R1DS@4890,3TTPU@5125	NA|NA|NA	G	to pectate lyase D
FGMG_003362-RA	5518.FGSG_10235P0	4.7e-75	288.1	Nectriaceae													Fungi	1FNS0@110618,21A36@147550,2BWW6@1,2S2E4@2759,3A6M5@33154,3P58T@4751,3QVKB@4890,3TI3F@5125	NA|NA|NA	S	Allergen Asp F7
FGMG_004788-RA	5518.FGSG_03894P0	1.1e-69	269.2	Nectriaceae													Fungi	1FUKH@110618,21A5P@147550,2EIX6@1,2SP7Z@2759,3AJPX@33154,3PDKT@4751,3QV0N@4890,3TIZY@5125	NA|NA|NA	S	alkaline foam protein B precursor
FGMG_005083-RA	5518.FGSG_03628P0	2.9e-254	884	Nectriaceae	cbhC	GO:0000272,GO:0003674,GO:0003824,GO:0004553,GO:0005975,GO:0005976,GO:0008150,GO:0008152,GO:0009056,GO:0009057,GO:0009251,GO:0016052,GO:0016162,GO:0016787,GO:0016798,GO:0043170,GO:0044042,GO:0044238,GO:0071704,GO:1901575	3.2.1.91	ko:K19668	ko00500,ko01100,ko02020,map00500,map01100,map02020		R02886,R11308	RC00799	ko00000,ko00001,ko01000		GH6		Fungi	1FTXK@110618,21499@147550,2QWHE@2759,39RNX@33154,3NXS8@4751,3QMEP@4890,3TF1A@5125,COG5297@1	NA|NA|NA	G	Belongs to the glycosyl hydrolase family 6
FGMG_005643-RA	5518.FGSG_03110P0	7.9e-146	523.5	Nectriaceae													Fungi	1FXEV@110618,21FWY@147550,2D4FJ@1,2SUZR@2759,3AS9Q@33154,3P9DN@4751,3R0U2@4890,3TN8Q@5125	NA|NA|NA
FGMG_005881-RA	5518.FGSG_02899P0	1.2e-186	659.1	Nectriaceae													Fungi	1FZ6R@110618,21BM9@147550,2D61Y@1,2T0FS@2759,3ATF5@33154,3PH1V@4751,3QWUS@4890,3TJ45@5125	NA|NA|NA
FGMG_006951-RA	101028.EKJ72284	7.3e-20	104.8	Nectriaceae													Fungi	1FYNX@110618,21IE4@147550,29ECN@1,2RMHM@2759,38R6Y@33154,3PSZU@4751,3RIW4@4890,3TRVH@5125	NA|NA|NA
FGMG_006961-RA	5507.FOXG_12050P0	3.7e-35	154.5	Nectriaceae													Fungi	1FYAD@110618,21KFQ@147550,2EZXW@1,2RVU3@2759,38XFT@33154,3PX0R@4751,3RG09@4890,3TQHR@5125	NA|NA|NA
FGMG_007302-RA	5518.FGSG_09145P0	6.9e-286	989.2	Nectriaceae													Fungi	1FT23@110618,21P96@147550,2SIRW@2759,39S5B@33154,3NVUC@4751,3QS73@4890,3TW7P@5125,COG0665@1	NA|NA|NA	E	FAD dependent oxidoreductase
FGMG_009735-RA	101028.EKJ69711	3.5e-290	1003.4	Nectriaceae													Fungi	1FKND@110618,2121F@147550,28IFH@1,2QQSB@2759,3945J@33154,3NUT8@4751,3QKGN@4890,3TKWA@5125	NA|NA|NA
FGMG_009812-RA	117187.FVEG_13456T0	7.3e-40	169.9	Nectriaceae													Fungi	1FY8D@110618,21KEA@147550,293PW@1,2RAKQ@2759,3AX0B@33154,3PWYG@4751,3RFXZ@4890,3TQGH@5125	NA|NA|NA
FGMG_009868-RA	101028.EKJ77465	1e-29	137.9	Ascomycota													Fungi	2D4U0@1,2SW9N@2759,3AUI1@33154,3PIG9@4751,3R64T@4890	NA|NA|NA
FGMG_010910-RA	5518.FGSG_12807P0	1.3e-96	359.4	Nectriaceae													Fungi	1FUX6@110618,219QD@147550,2CKHN@1,2SJBN@2759,3A92Q@33154,3P6TE@4751,3QZIK@4890,3TNC1@5125	NA|NA|NA
FGMG_011942-RA	5518.FGSG_11046P0	1.1e-121	442.6	Nectriaceae													Fungi	1FPG4@110618,219PZ@147550,2C42F@1,2SPRR@2759,3A3SQ@33154,3P49X@4751,3QUT6@4890,3TVN9@5125	NA|NA|NA
FGMG_001644-RA	5518.FGSG_01570P0	4e-90	338.6	Nectriaceae			3.1.1.74	ko:K08095					ko00000,ko01000				Fungi	1FZBH@110618,21AZ9@147550,2CYB2@1,2S3AW@2759,3A7ND@33154,3P6FD@4751,3QWRR@4890,3TIR4@5125	NA|NA|NA	O	Cutinase
FGMG_001909-RA	5518.FGSG_01815P0	7.2e-97	359.8	Nectriaceae													Fungi	1FY2X@110618,21C2W@147550,2ENC1@1,2SRTV@2759,3A6P0@33154,3P638@4751,3QXVF@4890,3TQCH@5125	NA|NA|NA
FGMG_002099-RA	5518.FGSG_01982P0	1.6e-173	615.5	Nectriaceae													Fungi	1FU83@110618,211Z1@147550,2QPRK@2759,38F46@33154,3NYY3@4751,3QJXQ@4890,3TFD0@5125,COG3485@1	NA|NA|NA	O	to extracellular dioxygenase
FGMG_003778-RA	101028.EKJ79105	4.1e-71	273.9	Sordariomycetes													Fungi	21CRA@147550,293HS@1,2RAEP@2759,3AWU6@33154,3PWVK@4751,3RFV4@4890	NA|NA|NA	S	CVNH domain
FGMG_004138-RA	101028.EKJ76086	1.5e-296	1024.6	Nectriaceae				ko:K22390					ko00000				Fungi	1FS8A@110618,217Z0@147550,38RDT@33154,3NY25@4751,3QN0U@4890,3TG3J@5125,COG1409@1,KOG1378@2759	NA|NA|NA	G	acid phosphatase
FGMG_004407-RA	5518.FGSG_04246P0	1.4e-246	858.6	Nectriaceae			3.4.11.15	ko:K01264					ko00000,ko01000,ko01002				Fungi	1FNR1@110618,211AA@147550,38GBP@33154,3NXTI@4751,3QMQ7@4890,3TEAU@5125,COG2234@1,KOG2195@2759	NA|NA|NA	O	Belongs to the peptidase M28 family
FGMG_005184-RA	5518.FGSG_03532P0	5.8e-236	823.2	Nectriaceae													Fungi	1FTER@110618,216WS@147550,28J36@1,2QRF9@2759,39JD5@33154,3Q3PU@4751,3RKS7@4890,3TMJ2@5125	NA|NA|NA	S	Secretory lipase
FGMG_005795-RA	101028.EKJ77765	1.4e-212	745.3	Nectriaceae													Fungi	1FU4B@110618,2133Q@147550,38H6S@33154,3NU05@4751,3QR0F@4890,3THUC@5125,COG1404@1,KOG1153@2759	NA|NA|NA	O	Belongs to the peptidase S8 family
FGMG_007124-RA	101028.EKJ72714	8.7e-65	252.7	Nectriaceae	LCL2	GO:0006508,GO:0006511,GO:0006807,GO:0006950,GO:0008150,GO:0008152,GO:0009056,GO:0009057,GO:0009987,GO:0010033,GO:0010243,GO:0010498,GO:0019538,GO:0019941,GO:0030163,GO:0030433,GO:0033554,GO:0034976,GO:0036503,GO:0042221,GO:0043161,GO:0043170,GO:0043632,GO:0044237,GO:0044238,GO:0044248,GO:0044257,GO:0044260,GO:0044265,GO:0044267,GO:0050896,GO:0051603,GO:0051716,GO:0071704,GO:1901564,GO:1901565,GO:…											Fungi	1FUSU@110618,21ASK@147550,2CYFG@1,2S416@2759,3A68K@33154,3P575@4751,3QW2J@4890,3TIVP@5125	NA|NA|NA	O	component of the endoplasmic reticulum- associated degradation (ERAD) pathway
FGMG_008350-RA	101028.EKJ69294	3e-27	127.5	Ascomycota													Fungi	2D64Y@1,2T0RA@2759,3AST2@33154,3PHZV@4751,3R5P6@4890	NA|NA|NA
FGMG_011825-RA	5518.FGSG_10922P0	2.3e-130	471.9	Nectriaceae				ko:K20628					ko00000				Fungi	1FNH4@110618,219C6@147550,2S9P9@2759,3A0PQ@33154,3NV2K@4751,3QS06@4890,3TVIE@5125,COG4305@1	NA|NA|NA	G	Pollen allergen
FGMG_002180-RA	5518.FGSG_02059P0	6.9e-247	859.4	Nectriaceae			3.2.1.22	ko:K07407	ko00052,ko00561,ko00600,ko00603,map00052,map00561,map00600,map00603		R01101,R01103,R01104,R01194,R01329,R02926,R03634,R04019,R04470,R05549,R05961,R06091	RC00049,RC00059,RC00451	ko00000,ko00001,ko01000				Fungi	1FVUZ@110618,2171H@147550,38EIP@33154,3NYHZ@4751,3QT8H@4890,3TSRZ@5125,KOG2366@1,KOG2366@2759	NA|NA|NA	G	Alpha galactosidase A
FGMG_004178-RA	5518.FGSG_12251P0	4.4e-280	969.9	Nectriaceae			3.1.6.1	ko:K01130	ko00140,ko00600,map00140,map00600		R03980,R04856	RC00128,RC00231	ko00000,ko00001,ko01000				Fungi	1FQVP@110618,214K9@147550,38E91@33154,3NVCA@4751,3QR41@4890,3TFAD@5125,COG3119@1,KOG3731@2759	NA|NA|NA	G	Belongs to the sulfatase family
FGMG_005261-RA	5518.FGSG_03457P0	4.3e-85	320.9	Nectriaceae		GO:0003674,GO:0003824,GO:0005575,GO:0005576,GO:0005975,GO:0006629,GO:0008150,GO:0008152,GO:0009056,GO:0009987,GO:0016042,GO:0016052,GO:0016787,GO:0016788,GO:0044237,GO:0044238,GO:0044248,GO:0044262,GO:0044275,GO:0050525,GO:0052689,GO:0071704,GO:1901575	3.1.1.74	ko:K08095					ko00000,ko01000				Fungi	1FZBI@110618,21P3I@147550,2A1QU@1,2SI38@2759,3A01F@33154,3P2ER@4751,3QVB3@4890,3TT87@5125	NA|NA|NA	G	Catalyzes the hydrolysis of cutin, a polyester that forms the structure of plant cuticle
FGMG_005941-RA	5518.FGSG_02841P0	5e-235	820.1	Nectriaceae													Fungi	1FMJY@110618,21D61@147550,2CHVX@1,2ST5S@2759,3AQFS@33154,3PFUZ@4751,3R282@4890,3TTMU@5125	NA|NA|NA
FGMG_008126-RA	101028.EKJ75376	3.9e-127	460.7	Nectriaceae													Fungi	1FNR0@110618,21EVT@147550,29NJX@1,2RVWT@2759,3APGF@33154,3PEDX@4751,3R216@4890,3TSAW@5125	NA|NA|NA	S	GAL4-like Zn(II)2Cys6 (or C6 zinc) binuclear cluster DNA-binding domain
FGMG_009930-RA	101028.EKJ75835	2.2e-71	275.8	Nectriaceae													Fungi	1FXYS@110618,21U53@147550,2CKU1@1,2RMAT@2759,38R01@33154,3PST3@4751,3RC7B@4890,3TRJJ@5125	NA|NA|NA
FGMG_012144-RA	5518.FGSG_11225P0	1.1e-53	215.7	Nectriaceae													Fungi	1FV81@110618,21T2J@147550,2F0IV@1,2T1Q0@2759,3ASAK@33154,3PGUY@4751,3R658@4890,3TNZD@5125	NA|NA|NA
FGMG_012336-RA	5518.FGSG_11399P0	4.6e-282	976.5	Nectriaceae													Fungi	1FRT6@110618,2179M@147550,2SJ3M@2759,38E49@33154,3NXRX@4751,3QRT4@4890,3TFPE@5125,COG0277@1	NA|NA|NA	C	to FAD-dependent oxygenase
FGMG_012343-RA	5518.FGSG_07972P0	3.7e-63	247.3	Sordariomycetes													Fungi	21GF5@147550,2FEIG@1,2TFV6@2759,3ATY1@33154,3PGJU@4751,3R6C4@4890	NA|NA|NA
FGMG_000089-RA	5518.FGSG_00062P0	3.3e-73	280.8	Hypocreales													Fungi	21FJ9@147550,2ETJK@1,2TE02@2759,3ARNJ@33154,3PG8X@4751,3R4QS@4890,3TN6H@5125	NA|NA|NA	S	Kp4
FGMG_000675-RA	5518.FGSG_00624P0	1.5e-123	449.1	Nectriaceae													Fungi	1FYBD@110618,21BMJ@147550,2ENBW@1,2SRTS@2759,3A7EJ@33154,3P5PY@4751,3QWDR@4890,3TQIF@5125	NA|NA|NA
FGMG_001677-RA	5518.FGSG_01596P0	4e-247	860.1	Nectriaceae			3.2.1.75	ko:K22277					ko00000,ko01000		GH5		Fungi	1FMES@110618,217BB@147550,2QVVM@2759,38F6I@33154,3PBFC@4751,3RMMY@4890,3TM25@5125,COG2730@1	NA|NA|NA	G	Belongs to the glycosyl hydrolase 5 (cellulase A) family
FGMG_004545-RA	5518.FGSG_04124P0	3.6e-136	491.1	Nectriaceae	CCS1	GO:0000041,GO:0000302,GO:0000303,GO:0000305,GO:0003674,GO:0003824,GO:0004784,GO:0005488,GO:0005507,GO:0005575,GO:0005576,GO:0005615,GO:0005622,GO:0005623,GO:0005634,GO:0005737,GO:0005739,GO:0005740,GO:0005743,GO:0005829,GO:0006801,GO:0006810,GO:0006811,GO:0006812,GO:0006825,GO:0006950,GO:0006979,GO:0008047,GO:0008150,GO:0008152,GO:0008270,GO:0009636,GO:0009987,GO:0010035,GO:0015680,GO:0016020,GO:…		ko:K04569,ko:K07213	ko04978,ko05014,map04978,map05014				ko00000,ko00001				Fungi	1FSRA@110618,212X0@147550,38K69@33154,3NZHY@4751,3QKIP@4890,3TG3E@5125,COG2608@1,KOG4656@2759	NA|NA|NA	P	Copper/zinc superoxide dismutase (SODC)
FGMG_004772-RA	5518.FGSG_03911P0	7.5e-100	369.8	Nectriaceae													Fungi	1FNJ9@110618,219TA@147550,2E1C8@1,2S8PP@2759,3A7JI@33154,3P3QQ@4751,3QUVU@4890,3TIH0@5125	NA|NA|NA	S	Prokaryotic phospholipase A2
FGMG_004920-RA	5518.FGSG_03784P0	4.6e-106	390.6	Nectriaceae													Fungi	1FVR4@110618,21DA8@147550,292TE@1,2R9Q2@2759,39Z67@33154,3NXJ3@4751,3QVWS@4890,3TSX9@5125	NA|NA|NA
FGMG_005556-RA	5518.FGSG_03194P0	5.9e-182	643.7	Nectriaceae			3.2.1.15,3.2.1.67	ko:K01184,ko:K01213	ko00040,ko01100,map00040,map01100	M00081	R01982,R02360,R07413	RC00049	ko00000,ko00001,ko00002,ko01000				Fungi	1FUDH@110618,21RCM@147550,2QTAW@2759,39KF2@33154,3Q4TR@4751,3RN44@4890,3TK63@5125,COG5434@1	NA|NA|NA	G	Glycosyl hydrolases family 28
FGMG_006809-RA	5518.FGSG_08238P0	4.6e-76	290.4	Nectriaceae													Fungi	1FUGH@110618,21B7F@147550,2C40I@1,2SPD0@2759,3A76I@33154,3P63W@4751,3QY12@4890,3TJ69@5125	NA|NA|NA
FGMG_007028-RA	101028.EKJ77473	5.5e-65	253.4	Nectriaceae													Fungi	1FVFU@110618,21G52@147550,2F3C7@1,2T4BF@2759,38Y1K@33154,3PXMP@4751,3R5NU@4890,3TP3B@5125	NA|NA|NA	S	CVNH domain
FGMG_007529-RA	101028.EKJ74718	3.6e-79	302	Nectriaceae													Fungi	1FQBI@110618,21K0N@147550,2CVK4@1,2RS6Y@2759,38UQ3@33154,3PWAH@4751,3RFA8@4890,3TW9R@5125	NA|NA|NA
FGMG_010196-RA	5518.FGSG_05084P0	9.1e-130	469.5	Nectriaceae													Fungi	1FRV4@110618,217CI@147550,2BYKQ@1,2SINP@2759,39ZY5@33154,3P2GC@4751,3QTYY@4890,3TMPR@5125	NA|NA|NA	S	Cupin
FGMG_012145-RA	101028.EKJ71014	3.6e-216	757.3	Nectriaceae			1.11.2.1	ko:K21820					ko00000,ko01000				Fungi	1FQ53@110618,21EGD@147550,2C2B4@1,2S6CG@2759,39RQ1@33154,3NZ6V@4751,3QR2V@4890,3TMPY@5125	NA|NA|NA	S	Peroxidase, family 2
FGMG_001925-RA	5518.FGSG_01831P0	1.1e-49	202.2	Nectriaceae													Fungi	1FVAW@110618,21BAM@147550,2ES87@1,2SUV9@2759,3A9QT@33154,3P722@4751,3QXP5@4890,3TNHH@5125	NA|NA|NA	S	Fungal hydrophobin
FGMG_005593-RA	5518.FGSG_03157P0	4.7e-67	260.4	Nectriaceae													Fungi	1FZF4@110618,21PVJ@147550,2EA79@1,2SGG8@2759,3ADZA@33154,3P93F@4751,3R0J7@4890,3TTMP@5125	NA|NA|NA
FGMG_006867-RA	101028.EKJ68959	3e-68	264.2	Sordariomycetes													Fungi	21G1W@147550,2EX1Y@1,2SYSW@2759,3AUYK@33154,3PGTY@4751,3R52R@4890	NA|NA|NA
FGMG_007249-RA	5518.FGSG_09095P0	2e-202	711.4	Nectriaceae													Fungi	1FZDI@110618,21PHS@147550,2C1GV@1,2RJZI@2759,38NH7@33154,3PQDG@4751,3R4YZ@4890,3TTFF@5125	NA|NA|NA
FGMG_009653-RA	5518.FGSG_06549P0	6.2e-239	833.2	Nectriaceae													Fungi	1FM6Q@110618,215EB@147550,2QRIP@2759,39UFN@33154,3NWJ2@4751,3QPPE@4890,3TG7A@5125,COG0726@1	NA|NA|NA	O	Chitin binding domain
FGMG_009958-RA	5518.FGSG_04864P0	4.8e-136	490.3	Nectriaceae	plyF		4.2.2.2	ko:K01728	ko00040,ko02024,map00040,map02024		R02361,R06240	RC00049,RC00705	ko00000,ko00001,ko01000				Fungi	1FZFM@110618,21PZW@147550,28K6I@1,2QSM3@2759,39WFJ@33154,3NY7H@4751,3RJ1X@4890,3TTPV@5125	NA|NA|NA	O	Pectate lyase
FGMG_011671-RA	101028.EKJ70970	1.6e-227	795	Nectriaceae	2021-04-01	GO:0000322,GO:0000323,GO:0000324,GO:0003674,GO:0003824,GO:0004175,GO:0004190,GO:0005575,GO:0005576,GO:0005618,GO:0005622,GO:0005623,GO:0005737,GO:0005739,GO:0005773,GO:0005783,GO:0005886,GO:0006508,GO:0006807,GO:0006914,GO:0006950,GO:0007154,GO:0008104,GO:0008150,GO:0008152,GO:0008233,GO:0009056,GO:0009057,GO:0009267,GO:0009277,GO:0009605,GO:0009897,GO:0009986,GO:0009987,GO:0009991,GO:0012505,GO:…	3.4.23.25	ko:K01381	ko04138,map04138				ko00000,ko00001,ko01000,ko01002				Fungi	1FTXQ@110618,21548@147550,38D42@33154,3NW5J@4751,3QKGP@4890,3TGQV@5125,KOG1339@1,KOG1339@2759	NA|NA|NA	O	Belongs to the peptidase A1 family
FGMG_012046-RA	5518.FGSG_13849P0	7.4e-55	219.5	Nectriaceae													Fungi	1FVPZ@110618,21GXW@147550,29G8V@1,2RPEY@2759,38NZ6@33154,3PQUN@4751,3RABD@4890,3TP82@5125	NA|NA|NA
FGMG_000087-RA	101028.EKJ69181	1.4e-74	285.4	Hypocreales													Fungi	21FIU@147550,2ETJK@1,2RMPI@2759,38RCS@33154,3PT5J@4751,3RCJP@4890,3TN4Q@5125	NA|NA|NA	S	Kp4
FGMG_003701-RA	5518.FGSG_10543P0	1.8e-127	461.8	Hypocreales													Fungi	21CQ7@147550,2F2I3@1,2T3GC@2759,38XAK@33154,3PWVC@4751,3RFUV@4890,3TJG5@5125	NA|NA|NA
FGMG_005621-RA	5518.FGSG_03129P0	4.9e-128	463.8	Ascomycota													Fungi	2C1E4@1,2SQHA@2759,3A57C@33154,3P4ZC@4751,3QW2X@4890	NA|NA|NA	S	GDSL-like Lipase/Acylhydrolase family
FGMG_005825-RA	5518.FGSG_02949P0	6.8e-254	882.9	Nectriaceae													Fungi	1FVYA@110618,212Q1@147550,2EFMC@1,2SKSW@2759,3A262@33154,3P37A@4751,3QUUP@4890,3TKKK@5125	NA|NA|NA
FGMG_007284-RA	5518.FGSG_09127P0	3.9e-62	243.8	Nectriaceae													Fungi	1FUVX@110618,21AT6@147550,2ETD7@1,2SVRF@2759,3A57N@33154,3P4IC@4751,3QWEE@4890,3TTFY@5125	NA|NA|NA
FGMG_007746-RA	101028.EKJ76477	2.3e-112	412.1	Nectriaceae													Fungi	1FMT1@110618,215R2@147550,3A38C@33154,3P4TJ@4751,3QUNG@4890,3TIM1@5125,COG2340@1,KOG3017@2759	NA|NA|NA	S	Belongs to the CRISP family
FGMG_008057-RA	5518.FGSG_09848P0	2.5e-234	817.8	Nectriaceae				ko:K09523	ko04141,ko05164,map04141,map05164				ko00000,ko00001,ko03110				Fungi	1FT2K@110618,212UR@147550,38BUQ@33154,3NWTW@4751,3QQUZ@4890,3TDBF@5125,COG0484@1,KOG0624@2759	NA|NA|NA	O	DnaJ molecular chaperone homology domain
FGMG_008249-RA	101028.EKJ71914	1.1e-234	818.9	Eukaryota													Eukaryota	KOG1339@1,KOG1339@2759	NA|NA|NA	M	aspartic-type endopeptidase activity
FGMG_008532-RA	101028.EKJ69245	4.4e-274	949.9	Nectriaceae	pgxB	GO:0000272,GO:0003674,GO:0003824,GO:0004553,GO:0004650,GO:0005575,GO:0005576,GO:0005975,GO:0005976,GO:0008150,GO:0008152,GO:0009056,GO:0009057,GO:0009987,GO:0010393,GO:0016052,GO:0016787,GO:0016798,GO:0017144,GO:0042737,GO:0043170,GO:0044237,GO:0044238,GO:0044248,GO:0045488,GO:0045490,GO:0071704,GO:1901575	3.2.1.67	ko:K01213	ko00040,ko01100,map00040,map01100	M00081	R01982,R07413	RC00049	ko00000,ko00001,ko00002,ko01000				Fungi	1FKGI@110618,212N7@147550,2QPPR@2759,38GAC@33154,3NVKJ@4751,3QKSZ@4890,3TSAZ@5125,COG5434@1	NA|NA|NA	G	Belongs to the glycosyl hydrolase 28 family
FGMG_009155-RA	101028.EKJ77156	7.6e-114	416.4	Nectriaceae													Fungi	1FKPS@110618,2143G@147550,28Q19@1,2QWPZ@2759,38SR7@33154,3NYID@4751,3QQCE@4890,3TI23@5125	NA|NA|NA	S	Secreted protein
FGMG_009468-RA	5518.FGSG_06712P0	1.4e-37	162.5	Nectriaceae													Fungi	1FVF2@110618,21G2Z@147550,2935W@1,2RA2U@2759,3AWGK@33154,3PMPZ@4751,3R6RJ@4890,3TNKP@5125	NA|NA|NA
FGMG_009753-RA	5518.FGSG_06452P0	7.4e-146	523.1	Nectriaceae													Fungi	1FT69@110618,212WR@147550,2QX78@2759,39KC9@33154,3Q4QX@4751,3RN0J@4890,3TW8W@5125,COG0726@1	NA|NA|NA	G	Polysaccharide deacetylase
FGMG_009845-RA	5518.FGSG_04741P0	5e-75	287	Nectriaceae													Fungi	1FV3V@110618,21ARV@147550,2F38Q@1,2T47V@2759,3AMU2@33154,3PE5J@4751,3QWJC@4890,3TNXP@5125	NA|NA|NA	S	Hypersensitive response-inducing protein
FGMG_011375-RA	5518.FGSG_06208P0	1.1e-267	928.7	Nectriaceae													Fungi	1FQZ2@110618,216J7@147550,2ECWD@1,2SM9C@2759,39UQ9@33154,3NYF5@4751,3QJPX@4890,3TCUN@5125	NA|NA|NA	O	Glycosyl hydrolase family 61
FGMG_012118-RA	101028.EKJ76934	3.9e-72	277.3	Nectriaceae													Fungi	1FUMI@110618,21A2W@147550,2EM1P@1,2SQTH@2759,3A3HQ@33154,3P3ZT@4751,3QWA9@4890,3TIVW@5125	NA|NA|NA	S	Protein SnodProt1 precursor
FGMG_012119-RA	5518.FGSG_11206P0	1.9e-264	917.9	Hypocreales													Fungi	21AFR@147550,2SNN5@2759,3A0PX@33154,3P26J@4751,3QVM7@4890,3TJ4M@5125,COG5361@1	NA|NA|NA	S	Protein of unknown function (DUF1254)
FGMG_012380-RA	5518.FGSG_11435P0	4.5e-131	474.6	Nectriaceae													Fungi	1FMZB@110618,21MD9@147550,2F3TZ@1,2T4TI@2759,38YKJ@33154,3PY71@4751,3RH9P@4890,3TVGG@5125	NA|NA|NA
FGMG_000617-RA	5518.FGSG_00569P0	2.1e-122	444.9	Nectriaceae													Fungi	1FVT4@110618,21GZA@147550,2F9SX@1,2TAYT@2759,38MAE@33154,3PP6H@4751,3R8FA@4890,3TPA4@5125	NA|NA|NA	S	Cysteine-rich secretory protein family
FGMG_000844-RA	5518.FGSG_00784P0	9e-71	272.7	Nectriaceae													Fungi	1FSH3@110618,21AEC@147550,2EK54@1,2SQ4D@2759,3A368@33154,3P3G5@4751,3QVU9@4890,3TSPK@5125	NA|NA|NA	S	Cutinase
FGMG_002104-RA	101028.EKJ74089	5e-234	816.6	Nectriaceae			1.14.18.1	ko:K00505	ko00350,ko00950,ko00965,ko01100,ko01110,ko04916,map00350,map00950,map00965,map01100,map01110,map04916	M00042	R00731,R02078,R02363,R02383,R04693,R04884	RC00046,RC00150,RC00180	ko00000,ko00001,ko00002,ko01000				Fungi	1FQY9@110618,211NX@147550,29DZU@1,2RM4B@2759,39X15@33154,3NVC7@4751,3QKJG@4890,3TIAP@5125	NA|NA|NA	S	Common central domain of tyrosinase
FGMG_002478-RA	5518.FGSG_02338P0	2.6e-186	657.9	Nectriaceae													Fungi	1FREM@110618,21MGP@147550,2E32C@1,2SA7H@2759,3A1HR@33154,3P3H9@4751,3QVI6@4890,3TVW1@5125	NA|NA|NA	S	Four repeated domains in the Fasciclin I family of proteins, present in many other contexts.
FGMG_003574-RA	5518.FGSG_10437P0	2.4e-127	461.5	Hypocreales													Fungi	21BQW@147550,2CBKS@1,2SQRY@2759,3A834@33154,3P5VF@4751,3R0T3@4890,3TN6S@5125	NA|NA|NA
FGMG_003740-RA	5518.FGSG_10585P0	3.6e-44	184.9	Nectriaceae													Fungi	1FXCR@110618,21EV7@147550,2CKVN@1,2RJZD@2759,38PNA@33154,3PRH3@4751,3RAZ5@4890,3TMKI@5125	NA|NA|NA
FGMG_004039-RA	5518.FGSG_04603P0	2.2e-157	561.6	Nectriaceae			4.2.1.1	ko:K01674	ko00910,map00910		R00132,R10092	RC02807	ko00000,ko00001,ko01000				Fungi	1FQ7Y@110618,211T9@147550,39UTB@33154,3NYY5@4751,3QQ4Q@4890,3TJQH@5125,COG3338@1,KOG0382@2759	NA|NA|NA	P	Eukaryotic-type carbonic anhydrase
FGMG_004520-RA	5518.FGSG_04146P0	1.5e-248	865.1	Nectriaceae													Fungi	1FSGI@110618,215EB@147550,2QRIP@2759,39UFN@33154,3NWJ2@4751,3QPPE@4890,3TG7A@5125,COG0726@1	NA|NA|NA	O	Polysaccharide deacetylase
FGMG_005363-RA	101028.EKJ75144	1.2e-35	156.8	Nectriaceae													Fungi	1FUXF@110618,21TI7@147550,2BY81@1,2RK2G@2759,38PRF@33154,3PRK4@4751,3RB2A@4890,3TNVY@5125	NA|NA|NA
FGMG_005371-RA	5518.FGSG_03365P0	1.7e-170	605.1	Nectriaceae													Fungi	1FSGJ@110618,21RCZ@147550,2D1FJ@1,2SHY0@2759,3AKBW@33154,3PD8J@4751,3R3DB@4890,3TUJG@5125	NA|NA|NA	O	Endonuclease/Exonuclease/phosphatase family
FGMG_006852-RA	29850.GGTG_05696T0	7.7e-21	106.3	Magnaporthales													Fungi	21IZ0@147550,2C1ZF@1,2RNA7@2759,38RZF@33154,3PTR6@4751,3RD3H@4890,41RQJ@639021	NA|NA|NA
FGMG_007014-RA	5518.FGSG_08037P0	3.5e-191	674.1	Nectriaceae													Fungi	1FTU0@110618,211Z1@147550,2QPRK@2759,38F46@33154,3NYY3@4751,3QJXQ@4890,3TR17@5125,COG3485@1	NA|NA|NA	O	Dioxygenase
FGMG_007530-RA	5518.FGSG_09345P0	1.5e-142	512.7	Ascomycota													Fungi	2D4U0@1,2SW9N@2759,3AUI1@33154,3PIG9@4751,3R64T@4890	NA|NA|NA
FGMG_008271-RA	5518.FGSG_07783P0	9.6e-285	985.3	Nectriaceae													Fungi	1FSAF@110618,21EPT@147550,39WEZ@33154,3NW9S@4751,3QM0E@4890,3TSWW@5125,KOG1382@1,KOG1382@2759	NA|NA|NA	S	Belongs to the histidine acid phosphatase family
FGMG_008287-RA	5518.FGSG_07772P0	3.1e-203	714.1	Nectriaceae													Fungi	1FW60@110618,217R6@147550,2EF09@1,2SKA3@2759,3A1EF@33154,3P28I@4751,3QUQF@4890,3TJSX@5125	NA|NA|NA	S	Glycosyl hydrolases family 16
FGMG_008377-RA	101028.EKJ68573	2.3e-98	364.8	Sordariomycetes													Fungi	21BRC@147550,2EQIF@1,2STIA@2759,3A7KK@33154,3P6GR@4751,3QX8I@4890	NA|NA|NA
FGMG_008596-RA	5518.FGSG_07491P0	2.3e-245	854.4	Nectriaceae			3.1.4.46	ko:K01126	ko00564,map00564		R01030,R01470	RC00017,RC00425	ko00000,ko00001,ko01000				Fungi	1FPJ1@110618,215MM@147550,2CNH4@1,2QW99@2759,392S2@33154,3NY4Y@4751,3QMJP@4890,3TENB@5125	NA|NA|NA	S	to glycerophosphoryl diester phosphodiesterase family
FGMG_009838-RA	5518.FGSG_04735P0	1.7e-81	308.5	Nectriaceae													Fungi	1FUJB@110618,21A5P@147550,2EIX6@1,2SP7Z@2759,3AJPX@33154,3PDKT@4751,3QV0N@4890,3TIZY@5125	NA|NA|NA	S	alkaline foam protein B precursor
FGMG_012235-RA	5518.FGSG_11304P0	1.4e-217	761.9	Nectriaceae	xlnC	GO:0000272,GO:0003674,GO:0003824,GO:0004553,GO:0005575,GO:0005576,GO:0005975,GO:0005976,GO:0008150,GO:0008152,GO:0009056,GO:0009057,GO:0009987,GO:0010383,GO:0010410,GO:0016052,GO:0016787,GO:0016798,GO:0031176,GO:0043170,GO:0044036,GO:0044237,GO:0044238,GO:0044260,GO:0045491,GO:0045493,GO:0071554,GO:0071704,GO:0097599,GO:1901575	3.2.1.8	ko:K01181					ko00000,ko01000				Fungi	1FQ2N@110618,214KJ@147550,2QSCW@2759,38FNV@33154,3NWA4@4751,3QP1E@4890,3TJ6P@5125,COG3693@1	NA|NA|NA	G	Glycosyl hydrolase family 10
FGMG_000013-RA	101028.EKJ68959	3.6e-07	61.2	Sordariomycetes													Fungi	21G1W@147550,2EX1Y@1,2SYSW@2759,3AUYK@33154,3PGTY@4751,3R52R@4890	NA|NA|NA
FGMG_002521-RA	101028.EKJ72950	3.7e-146	524.2	Nectriaceae													Fungi	1FZJP@110618,21QWM@147550,2EVSI@1,2SXQ8@2759,39J10@33154,3Q3DU@4751,3RKFB@4890,3TU6W@5125	NA|NA|NA	O	Belongs to the peptidase S1B family
FGMG_003646-RA	5507.FOXG_14514P0	1e-18	100.9	Nectriaceae													Fungi	1FT15@110618,21RAR@147550,39KB4@33154,3NZRS@4751,3RN35@4890,3TM7H@5125,COG2124@1,KOG0157@2759	NA|NA|NA	IQ	Cytochrome P450
FGMG_003709-RA	101028.EKJ76435	3.5e-143	514.2	Nectriaceae													Fungi	1FUIX@110618,217XX@147550,2ETJK@1,2T0JN@2759,3AU3T@33154,3PH6W@4751,3R6BQ@4890,3TEZH@5125	NA|NA|NA	S	Kp4
FGMG_003903-RA	5518.FGSG_11548P0	2.8e-131	474.6	Nectriaceae													Fungi	1FW9Y@110618,2196M@147550,2EJAT@1,2SPI4@2759,3A0W0@33154,3P1Z3@4751,3QTGN@4890,3TNQY@5125	NA|NA|NA	G	Catalyzes the hydrolysis of cutin, a polyester that forms the structure of plant cuticle
FGMG_004981-RA	101028.EKJ73746	7.5e-272	942.6	Nectriaceae													Fungi	1FYZ9@110618,216UN@147550,2A174@1,2RY03@2759,3AEJQ@33154,3PC1Y@4751,3R0XH@4890,3TM2D@5125	NA|NA|NA	S	TAP-like protein
FGMG_005135-RA	5518.FGSG_03581P0	1.6e-108	398.7	Nectriaceae													Fungi	1FUHW@110618,21CC9@147550,2EXAH@1,2SZ09@2759,3AR8Z@33154,3PG2T@4751,3R4NX@4890,3TRZR@5125	NA|NA|NA
FGMG_005277-RA	5518.FGSG_12434P0	8.6e-225	786.2	Nectriaceae													Fungi	1FR24@110618,21MX1@147550,2S6W7@2759,38SF0@33154,3PU64@4751,3RDHF@4890,3TVU9@5125,COG5599@1	NA|NA|NA	T	protein tyrosine phosphatase activity
FGMG_005333-RA	5518.FGSG_03394P0	7.4e-154	549.7	Nectriaceae													Fungi	1FQH3@110618,218Q1@147550,2D3PD@1,2SS8U@2759,3A58J@33154,3P433@4751,3R2CA@4890,3TKVW@5125	NA|NA|NA	S	Necrosis inducing protein (NPP1)
FGMG_005735-RA	101028.EKJ77709	3.7e-279	966.8	Nectriaceae													Fungi	1FMTH@110618,21857@147550,38GBP@33154,3NXTI@4751,3QTZF@4890,3TSBZ@5125,COG2234@1,KOG2195@2759	NA|NA|NA	O	Belongs to the peptidase M28 family
FGMG_006538-RA	101028.EKJ69307	1.3e-119	436.8	Nectriaceae													Fungi	1FRT1@110618,213XG@147550,2CN61@1,2QU23@2759,391XD@33154,3NWY2@4751,3QN8X@4890,3TFUQ@5125	NA|NA|NA	O	Ribosomal protein s17
FGMG_006870-RA	101028.EKJ68956	8.6e-204	716.5	Nectriaceae													Fungi	1FXF7@110618,21D61@147550,2CHVX@1,2ST5S@2759,3AQFS@33154,3PFUZ@4751,3R282@4890,3TRE2@5125	NA|NA|NA
FGMG_007108-RA	5518.FGSG_08972P0	9.2e-178	629.4	Nectriaceae													Fungi	1FTVQ@110618,21E28@147550,2DYGC@1,2S6US@2759,3A8B0@33154,3P2WT@4751,3QVFD@4890,3TWDE@5125	NA|NA|NA	S	Fungal specific transcription factor domain
FGMG_007244-RA	5518.FGSG_09090P0	2.8e-72	277.7	Nectriaceae													Fungi	1FMWY@110618,2164F@147550,39Z8T@33154,3NZS3@4751,3QNF7@4890,3TK1F@5125,COG3325@1,KOG2806@2759	NA|NA|NA	G	Conserved hypothetical protein
FGMG_008242-RA	5518.FGSG_07807P0	3.2e-74	284.3	Nectriaceae													Fungi	1FV3V@110618,21ARV@147550,2F38Q@1,2T47V@2759,3AMU2@33154,3PE5J@4751,3QWJC@4890,3TNXP@5125	NA|NA|NA	S	Hypersensitive response-inducing protein
FGMG_010747-RA	5518.FGSG_05624P0	3.4e-224	783.9	Nectriaceae			2.4.1.144	ko:K00737	ko00510,ko01100,map00510,map01100	M00075	R05986		ko00000,ko00001,ko00002,ko01000,ko01003		GT17		Fungi	1FPC4@110618,214KD@147550,28HI1@1,2QPVW@2759,39WVW@33154,3NUGT@4751,3QNRS@4890,3TD9B@5125	NA|NA|NA	G	Glycosyltransferase family 17
FGMG_011264-RA	5518.FGSG_06110P0	2.9e-164	584.3	Nectriaceae			1.14.99.54	ko:K19356					ko00000,ko01000		AA9,CBM1		Fungi	1FM6E@110618,2141G@147550,2A2M4@1,2RY3D@2759,39Z1J@33154,3NYCR@4751,3QMVF@4890,3TDPF@5125	NA|NA|NA	O	Glycosyl hydrolase family 61
FGMG_001856-RA	5518.FGSG_01763P0	7.4e-37	159.8	Nectriaceae													Fungi	1FYAZ@110618,21I5A@147550,2BZBB@1,2RM3E@2759,38QSF@33154,3PSJF@4751,3RC07@4890,3TR77@5125	NA|NA|NA
FGMG_002321-RA	101028.EKJ79526	1.5e-106	392.1	Nectriaceae													Fungi	1FS6B@110618,21CSZ@147550,2DQ6N@1,2S6B1@2759,3A6RY@33154,3P6FS@4751,3QXST@4890,3TJH8@5125	NA|NA|NA	S	IgE-binding protein
FGMG_003112-RA	5518.FGSG_10004P0	3.6e-157	561.2	Nectriaceae													Fungi	1FTFG@110618,217DC@147550,2AA6V@1,2RYEI@2759,3A0SS@33154,3P204@4751,3QQ0Q@4890,3TRMW@5125	NA|NA|NA	O	Pectate lyase
FGMG_004776-RA	101028.EKJ74618	4.4e-96	357.8	Nectriaceae													Fungi	1FXBE@110618,21I1S@147550,29HBX@1,2RQIG@2759,38UA9@33154,3PVX6@4751,3REZK@4890,3TPYH@5125	NA|NA|NA
FGMG_004958-RA	5518.FGSG_03748P0	2.5e-116	424.9	Nectriaceae													Fungi	1FP3A@110618,21AHU@147550,2BHNK@1,2S1C9@2759,3A3MP@33154,3P4AM@4751,3QW5X@4890,3TVKS@5125	NA|NA|NA	S	Tuberculosis necrotizing toxin
FGMG_005115-RA	5518.FGSG_03600P0	1.7e-96	358.6	Sordariomycetes													Fungi	21BRI@147550,2EX4Y@1,2SYVI@2759,3AD4Y@33154,3P8HS@4751,3QZ6T@4890	NA|NA|NA
FGMG_005859-RA	5518.FGSG_02918P0	5.6e-222	776.5	Nectriaceae			3.4.23.25	ko:K01381	ko04138,map04138				ko00000,ko00001,ko01000,ko01002				Fungi	1FS49@110618,216VU@147550,39W9B@33154,3NWTX@4751,3QUAF@4890,3TKIT@5125,KOG1339@1,KOG1339@2759	NA|NA|NA	O	Belongs to the peptidase A1 family
FGMG_006750-RA	101028.EKJ70294	3.4e-44	184.9	Nectriaceae													Fungi	1FUZW@110618,21AZS@147550,2ESXJ@1,2SVD7@2759,3AQ2X@33154,3PFQJ@4751,3QX56@4890,3TNFM@5125	NA|NA|NA
FGMG_009761-RA	101028.EKJ69683	1e-201	709.1	Nectriaceae			3.2.1.8	ko:K01181					ko00000,ko01000				Fungi	1FUBH@110618,218IH@147550,2SHCI@2759,38ERR@33154,3NYJH@4751,3RM2U@4890,3TTS9@5125,COG3693@1	NA|NA|NA	G	Glycosyl hydrolase family 10
FGMG_010732-RA	5518.FGSG_05609P0	2.6e-26	124.8	Nectriaceae													Fungi	1FYUI@110618,21TXQ@147550,2FI6W@1,2TJM9@2759,38MKK@33154,3PPGT@4751,3R6ER@4890,3TQW5@5125	NA|NA|NA
FGMG_002518-RA	5518.FGSG_02378P0	1.7e-60	238.4	Nectriaceae													Fungi	1FZDQ@110618,21PIE@147550,2ETD7@1,2SVRF@2759,3A57N@33154,3P4IC@4751,3QWNV@4890,3TTFZ@5125	NA|NA|NA
FGMG_004011-RA	101028.EKJ71638	9.8e-115	419.5	Nectriaceae													Fungi	1FVQM@110618,21BK0@147550,2CGHX@1,2SRRT@2759,3ANF1@33154,3PEV2@4751,3QY0Q@4890,3TP8M@5125	NA|NA|NA	S	Podospora anserina S mat genomic DNA chromosome
FGMG_004174-RA	5518.FGSG_04471P0	1e-124	452.6	Nectriaceae													Fungi	1FQ6Q@110618,216Q4@147550,2EBNU@1,2SHQD@2759,3AFY8@33154,3PC5I@4751,3QURC@4890,3TJVQ@5125	NA|NA|NA
FGMG_005048-RA	5518.FGSG_03662P0	5.1e-107	393.7	Nectriaceae		GO:0000003,GO:0000905,GO:0003006,GO:0005575,GO:0005576,GO:0007049,GO:0007275,GO:0008150,GO:0009653,GO:0009987,GO:0019953,GO:0019954,GO:0022402,GO:0022414,GO:0030154,GO:0030435,GO:0030582,GO:0030584,GO:0032501,GO:0032502,GO:0034293,GO:0043934,GO:0043935,GO:0044703,GO:0048468,GO:0048608,GO:0048646,GO:0048731,GO:0048856,GO:0048869,GO:0051321,GO:0051704,GO:0061458,GO:0070787,GO:0070790,GO:0075259,GO:…											Fungi	1FZ93@110618,21A9M@147550,2EIJU@1,2SNZ2@2759,3A41K@33154,3P438@4751,3QVT4@4890,3TT0B@5125	NA|NA|NA	S	cell wall protein
FGMG_007277-RA	117187.FVEG_13766T0	2.6e-149	535.4	Nectriaceae													Fungi	1FMWY@110618,2164F@147550,39Z8T@33154,3NZS3@4751,3QNF7@4890,3TK1F@5125,COG3325@1,KOG2806@2759	NA|NA|NA	G	Conserved hypothetical protein
FGMG_008150-RA	101028.EKJ68784	2.2e-84	318.5	Nectriaceae													Fungi	1FZDH@110618,21PHR@147550,2C45N@1,2RIT6@2759,38NH9@33154,3PQDH@4751,3R10J@4890,3TTFE@5125	NA|NA|NA
FGMG_010589-RA	5518.FGSG_12741P0	8.7e-161	572.8	Nectriaceae			1.14.11.2	ko:K00472	ko00330,ko01100,map00330,map01100		R01252	RC00478	ko00000,ko00001,ko01000				Fungi	1FQQ9@110618,218ZF@147550,39TQ9@33154,3P14U@4751,3QTUR@4890,3TSGY@5125,KOG1591@1,KOG1591@2759	NA|NA|NA	E	Prolyl 4-hydroxylase alpha subunit homologues.
FGMG_012037-RA	5518.FGSG_11134P0	1.2e-105	389.8	Nectriaceae													Fungi	1FY0I@110618,21I9S@147550,2F2SM@1,2T3R9@2759,38XJ8@33154,3PX3F@4751,3RG2X@4890,3TRKE@5125	NA|NA|NA
FGMG_002381-RA	5518.FGSG_02255P0	2.7e-128	464.5	Nectriaceae													Fungi	1FUFB@110618,21SZD@147550,2CR1M@1,2R6IU@2759,38JZ6@33154,3PMUV@4751,3R6VY@4890,3TNRK@5125	NA|NA|NA
FGMG_003829-RA	5518.FGSG_10675P0	6.4e-179	633.3	Sordariomycetes			3.1.1.17	ko:K01053	ko00030,ko00053,ko00930,ko01100,ko01110,ko01120,ko01130,ko01200,ko01220,map00030,map00053,map00930,map01100,map01110,map01120,map01130,map01200,map01220	M00129	R01519,R02933,R03751	RC00537,RC00983	ko00000,ko00001,ko00002,ko01000,ko04147				Fungi	2182G@147550,2CVJ3@1,2RS4K@2759,39XYN@33154,3NY8D@4751,3QREX@4890	NA|NA|NA	S	SMP-30/Gluconolaconase/LRE-like region
FGMG_005594-RA	5518.FGSG_03156P0	1.7e-80	305.1	Nectriaceae													Fungi	1FYAE@110618,21KFT@147550,290CH@1,2R77J@2759,38K91@33154,3PN4A@4751,3R746@4890,3TQHS@5125	NA|NA|NA
FGMG_005794-RA	5518.FGSG_02977P0	3.8e-136	490.7	Nectriaceae													Fungi	1FTCF@110618,215BA@147550,2AA6V@1,2RYEI@2759,3A0SS@33154,3P1FA@4751,3QMRF@4890,3TWA7@5125	NA|NA|NA	E	pectate lyase
FGMG_007044-RA	5518.FGSG_08011P0	8.5e-170	602.8	Nectriaceae													Fungi	1FQ0W@110618,216Q7@147550,2D1XI@1,2SJNZ@2759,3A002@33154,3P1XX@4751,3QK7Q@4890,3TVQI@5125	NA|NA|NA	O	Fungal-type cellulose-binding domain
FGMG_008407-RA	101028.EKJ72772	1.7e-254	884.8	Nectriaceae													Fungi	1FNXS@110618,217YY@147550,2CUYI@1,2RPSG@2759,39KQJ@33154,3NZH8@4751,3QP13@4890,3TKUP@5125	NA|NA|NA	I	Serine aminopeptidase, S33
FGMG_000347-RA	5518.FGSG_00314P0	1.3e-162	579.3	Nectriaceae													Fungi	1FNPX@110618,2171B@147550,29V7E@1,2RXK9@2759,3A0M0@33154,3P1VS@4751,3QQEN@4890,3TD8U@5125	NA|NA|NA	O	Glycosyl hydrolase catalytic core
FGMG_002447-RA	5465.ENH82361	2.2e-09	68.9	Sordariomycetes													Fungi	21GG6@147550,2CGK0@1,2T0YI@2759,3ATDW@33154,3PHH8@4751,3R55Q@4890	NA|NA|NA
FGMG_002517-RA	5518.FGSG_02377P0	2e-119	435.3	Nectriaceae													Fungi	1FZDK@110618,219PZ@147550,2C42F@1,2SPRR@2759,3A3SQ@33154,3P49X@4751,3QUT6@4890,3TTFJ@5125	NA|NA|NA
FGMG_005527-RA	5518.FGSG_03217P0	1.1e-220	772.3	Sordariomycetes													Fungi	216RA@147550,2D23F@1,2SKAJ@2759,39VB3@33154,3P058@4751,3QM04@4890	NA|NA|NA	G	Belongs to the tannase family
FGMG_005725-RA	5518.FGSG_03035P0	6.5e-78	296.6	Hypocreales													Fungi	21AP2@147550,2C758@1,2SP40@2759,3ABA1@33154,3P7QR@4751,3QZEZ@4890,3TNK4@5125	NA|NA|NA	S	Alternaria alternata allergen 1
FGMG_012034-RA	5518.FGSG_11131P0	2.8e-84	318.2	Nectriaceae													Fungi	1FZDJ@110618,21PHQ@147550,2C45N@1,2SUW7@2759,3AJMS@33154,3PD8S@4751,3QVYE@4890,3TTFG@5125	NA|NA|NA
FGMG_012286-RA	5518.FGSG_11350P0	4.6e-221	773.5	Nectriaceae													Fungi	1FPR1@110618,217ER@147550,2D1NT@1,2SIR3@2759,39VGH@33154,3NZZ0@4751,3QKU1@4890,3TSE2@5125	NA|NA|NA	S	Alpha/beta hydrolase family
FGMG_003448-RA	5518.FGSG_10316P0	8.3e-142	509.6	Nectriaceae													Fungi	1FNZ0@110618,219YI@147550,2CZ37@1,2S85Z@2759,3A7C7@33154,3P6JQ@4751,3QWTQ@4890,3TIM7@5125	NA|NA|NA	S	Conserved hypothetical protein
FGMG_004491-RA	5518.FGSG_04176P0	2.1e-166	591.7	Nectriaceae													Fungi	1FZGG@110618,2192A@147550,2EHJ8@1,2SN6Y@2759,3ADQ0@33154,3P8X3@4751,3QVSF@4890,3THXU@5125	NA|NA|NA	S	allergen asp
FGMG_005710-RA	5518.FGSG_03049P0	1.3e-195	688.7	Nectriaceae													Fungi	1FNYU@110618,2158A@147550,2R8XS@2759,39RII@33154,3NYQN@4751,3QKT4@4890,3TNDF@5125,COG3940@1	NA|NA|NA	G	Belongs to the glycosyl hydrolase 43 family
FGMG_008285-RA	27337.EGY20079	3.7e-86	324.7	Glomerellales			3.1.1.74	ko:K08095					ko00000,ko01000				Fungi	1EW04@1028384,21AZ9@147550,2CYB2@1,2S3AW@2759,3A7ND@33154,3P6FD@4751,3QWRR@4890	NA|NA|NA	G	Catalyzes the hydrolysis of cutin, a polyester that forms the structure of plant cuticle
FGMG_010994-RA	101028.EKJ74036	1.8e-219	768.5	Nectriaceae			3.5.1.41	ko:K01452	ko00520,ko01100,map00520,map01100		R02333	RC00166,RC00300	ko00000,ko00001,ko01000				Fungi	1FMIV@110618,21R74@147550,2S2CW@2759,39Z6D@33154,3NX9B@4751,3QMPP@4890,3TTTT@5125,COG0726@1	NA|NA|NA	O	Chitin binding domain
FGMG_012146-RA	101028.EKJ71015	1.4e-240	838.6	Nectriaceae													Fungi	1FQEP@110618,218YQ@147550,2C2TR@1,2QSW8@2759,38F0U@33154,3NZ2A@4751,3QQ18@4890,3TMEK@5125	NA|NA|NA	S	Lipase B
FGMG_012263-RA	5518.FGSG_11333P0	3.5e-69	268.9	Nectriaceae													Fungi	1FYIK@110618,21HX8@147550,29DKR@1,2RKQX@2759,38QDI@33154,3PS7C@4751,3RBNW@4890,3TQPA@5125	NA|NA|NA
FGMG_000121-RA	101028.EKJ69751	4.5e-64	250.4	Nectriaceae													Fungi	1FVI1@110618,21T46@147550,2RJ6D@2759,38NVX@33154,3PQRM@4751,3RA82@4890,3TP4A@5125,COG0666@1	NA|NA|NA	S	protein ubiquitination
FGMG_003580-RA	101028.EKJ70078	2.8e-35	154.1	Nectriaceae													Fungi	1FYJG@110618,21C2R@147550,29DZF@1,2RM3Y@2759,3AUBE@33154,3PI7T@4751,3QZXH@4890,3TJ87@5125	NA|NA|NA
FGMG_003773-RA	5518.FGSG_10618P0	6.7e-52	209.5	Hypocreales													Fungi	21FWS@147550,2CAZ2@1,2T4WP@2759,38YQ2@33154,3PYAH@4751,3RHDI@4890,3TN9P@5125	NA|NA|NA
FGMG_008557-RA	5518.FGSG_07531P0	8.4e-174	616.3	Nectriaceae													Fungi	1FU2G@110618,219UG@147550,2D3V7@1,2SSWB@2759,3ACK3@33154,3P9GP@4751,3QVYK@4890,3TIRV@5125	NA|NA|NA
FGMG_010292-RA	5518.FGSG_05176P0	2.1e-139	501.5	Nectriaceae													Fungi	1FR55@110618,21B40@147550,2EHZX@1,2SNI8@2759,3A26M@33154,3P3FT@4751,3QVJN@4890,3TINW@5125	NA|NA|NA
FGMG_012098-RA	101028.EKJ76954	4e-51	207.2	Nectriaceae													Fungi	1FUSA@110618,21PIV@147550,2E2Z1@1,2SA4T@2759,3A5MB@33154,3P5NF@4751,3QW61@4890,3TSZK@5125	NA|NA|NA	S	ribonuclease
FGMG_001822-RA	5518.FGSG_01728P0	1.7e-178	631.7	Nectriaceae													Fungi	1FS44@110618,21624@147550,29PX2@1,2RX74@2759,39XX9@33154,3NZDP@4751,3QKQ2@4890,3TSKP@5125	NA|NA|NA	S	Domain of unknown function (DUF1996)
FGMG_003125-RA	5518.FGSG_10014P0	8.9e-170	602.8	Nectriaceae													Fungi	1FQV8@110618,217C7@147550,2D7J3@1,2T6FV@2759,3AKZI@33154,3PDVD@4751,3QX1U@4890,3TCXD@5125	NA|NA|NA
FGMG_005253-RA	101028.EKJ69548	1.3e-262	911.8	Nectriaceae													Fungi	1FMA5@110618,219V9@147550,39VHV@33154,3NVP7@4751,3R100@4890,3THYN@5125,COG2939@1,KOG1282@2759	NA|NA|NA	EO	Belongs to the peptidase S10 family
FGMG_007348-RA	5127.CCT64754	6e-42	176.8	Nectriaceae													Fungi	1FP41@110618,21R5X@147550,2CMEG@1,2QQ4M@2759,39QM2@33154,3P1PE@4751,3QRJV@4890,3TKQV@5125	NA|NA|NA	S	Serine aminopeptidase, S33
FGMG_009829-RA	5127.CCT74165	1e-118	433	Nectriaceae													Fungi	1FXGM@110618,21JDE@147550,38D7U@33154,3NUI0@4751,3QKXX@4890,3TQTT@5125,COG2072@1,KOG1399@2759	NA|NA|NA	Q	monooxygenase
FGMG_011910-RA	101028.EKJ77397	1.5e-160	572	Nectriaceae													Fungi	1FVVK@110618,217GG@147550,29X3U@1,2RXR0@2759,3A0Y7@33154,3P22G@4751,3R10M@4890,3TK29@5125	NA|NA|NA	O	Glycosyl hydrolase catalytic core
FGMG_011946-RA	5518.FGSG_11049P0	7.5e-161	573.2	Nectriaceae			3.1.1.72	ko:K05972					ko00000,ko01000				Fungi	1FNME@110618,213XF@147550,2QTDU@2759,39SMP@33154,3NZTT@4751,3QMXZ@4890,3TVIX@5125,COG3509@1	NA|NA|NA	O	esterase
FGMG_002853-RA	5518.FGSG_02685P0	2.5e-82	311.2	Nectriaceae													Fungi	1FUPJ@110618,21B39@147550,2BVQR@1,2S2BT@2759,3A31R@33154,3P3CF@4751,3QVW6@4890,3TS0Q@5125	NA|NA|NA
FGMG_003984-RA	474922.ELA32215	1.5e-21	108.2	Glomerellales													Fungi	1F3SJ@1028384,21FSD@147550,2F6C3@1,2T7E4@2759,391P8@33154,3PXXD@4751,3R51R@4890	NA|NA|NA
FGMG_004068-RA	5518.FGSG_04572P0	3.8e-212	743.8	Nectriaceae	PMU1	GO:0005575,GO:0005622,GO:0005623,GO:0005634,GO:0005737,GO:0043226,GO:0043227,GO:0043229,GO:0043231,GO:0044424,GO:0044464											Fungi	1FSH8@110618,2160A@147550,38T15@33154,3NWTI@4751,3QRZH@4890,3TDAD@5125,KOG4754@1,KOG4754@2759	NA|NA|NA	G	Histidine phosphatase superfamily (branch 1)
FGMG_005272-RA	5518.FGSG_03445P0	3e-75	287.7	Nectriaceae													Fungi	1FUWM@110618,21B7F@147550,2C40I@1,2SPD0@2759,3A76I@33154,3P63W@4751,3QY12@4890,3TJ69@5125	NA|NA|NA
FGMG_005865-RA	5518.FGSG_02913P0	1.5e-92	345.5	Nectriaceae													Fungi	1FVC8@110618,21GU2@147550,2CHF0@1,2SYJU@2759,38M8X@33154,3PP50@4751,3R8DQ@4890,3TP1H@5125	NA|NA|NA
FGMG_012315-RA	101028.EKJ76914	8.4e-120	437.2	Nectriaceae													Fungi	1FPNB@110618,21ARU@147550,2EGZ9@1,2SMSU@2759,3AK5Y@33154,3PDCF@4751,3QV8R@4890,3TVNZ@5125	NA|NA|NA
FGMG_001418-RA	5518.FGSG_01351P0	6.6e-219	766.5	Nectriaceae	SUN4	GO:0000272,GO:0003674,GO:0003824,GO:0004553,GO:0005488,GO:0005575,GO:0005576,GO:0005618,GO:0005622,GO:0005623,GO:0005737,GO:0005739,GO:0005759,GO:0005783,GO:0005975,GO:0005976,GO:0006073,GO:0006074,GO:0006076,GO:0006996,GO:0007005,GO:0008150,GO:0008152,GO:0008422,GO:0009056,GO:0009057,GO:0009251,GO:0009277,GO:0009986,GO:0009987,GO:0012505,GO:0015926,GO:0016043,GO:0016052,GO:0016787,GO:0016798,GO:…		ko:K01238					ko00000,ko01000				Fungi	1FNQ1@110618,2140Z@147550,28HI0@1,2QPVV@2759,39SS9@33154,3NUJ1@4751,3QM7G@4890,3TG8C@5125	NA|NA|NA	S	Beta-glucosidase (SUN family)
FGMG_003340-RA	5518.FGSG_10212P0	1.1e-74	285.8	Nectriaceae													Fungi	1FUGM@110618,21A2W@147550,2EM1P@1,2SQTH@2759,3A3HQ@33154,3P3ZT@4751,3QWA9@4890,3TIVW@5125	NA|NA|NA	S	Cerato-platanin
FGMG_004819-RA	101028.EKJ73189	5e-163	580.5	Nectriaceae			3.1.1.72	ko:K05972					ko00000,ko01000				Fungi	1FQGT@110618,2125K@147550,2QTDU@2759,38ESY@33154,3NXWW@4751,3QQQB@4890,3TK2G@5125,COG3509@1	NA|NA|NA	O	Esterase PHB depolymerase
FGMG_005863-RA	101028.EKJ73091	7.3e-73	279.6	Sordariomycetes													Fungi	21FJ4@147550,2C6TV@1,2TBYF@2759,3ANG0@33154,3PF2X@4751,3R4AJ@4890	NA|NA|NA
FGMG_003941-RA	5518.FGSG_04684P0	2.4e-215	754.6	Nectriaceae													Fungi	1FNKH@110618,218HK@147550,2EFJJ@1,2SKRG@2759,3AEP1@33154,3PBYB@4751,3QSBN@4890,3TVIS@5125	NA|NA|NA	S	Conserved hypothetical protein
FGMG_006955-RA	5127.CCT65119	1.3e-31	142.5	Nectriaceae													Fungi	1FVPQ@110618,21GXN@147550,2RJ9E@2759,38NYY@33154,3PQUF@4751,3RAB5@4890,3TP7W@5125,COG0666@1	NA|NA|NA	S	protein ubiquitination
FGMG_001779-RA	5518.FGSG_01688P0	5.8e-113	413.7	Nectriaceae													Fungi	1FVR5@110618,21T5P@147550,2CU53@1,2RJA9@2759,38NZR@33154,3PQV7@4751,3RABZ@4890,3TP8Y@5125	NA|NA|NA
FGMG_002482-RA	5518.FGSG_02342P0	7.7e-119	433.3	Nectriaceae		GO:0003674,GO:0003824,GO:0005575,GO:0005576,GO:0005975,GO:0006629,GO:0008150,GO:0008152,GO:0009056,GO:0009987,GO:0016042,GO:0016052,GO:0016787,GO:0016788,GO:0044237,GO:0044238,GO:0044248,GO:0044262,GO:0044275,GO:0050525,GO:0052689,GO:0071704,GO:1901575	3.1.1.74	ko:K08095					ko00000,ko01000				Fungi	1FTS1@110618,2173S@147550,2A1QU@1,2SI38@2759,3A01F@33154,3P2ER@4751,3QTNS@4890,3TIC7@5125	NA|NA|NA	O	Catalyzes the hydrolysis of cutin, a polyester that forms the structure of plant cuticle
FGMG_002820-RA	5518.FGSG_02651P0	2.3e-161	574.7	Nectriaceae													Fungi	1FKMZ@110618,21295@147550,2S1W9@2759,39VMF@33154,3P19Z@4751,3QJEN@4890,3TK8U@5125,COG2273@1	NA|NA|NA	O	Glycosyl hydrolases family 16
FGMG_003942-RA	5518.FGSG_04685P0	5.4e-209	733.4	Nectriaceae													Fungi	1FNGG@110618,217QM@147550,2QW1S@2759,39S12@33154,3NWNY@4751,3QNVJ@4890,3TSP3@5125,COG3485@1	NA|NA|NA	O	to GPI anchored dioxygenase
FGMG_005407-RA	5518.FGSG_03334P0	4.7e-76	290.4	Nectriaceae													Fungi	1FUHB@110618,21ACW@147550,2EHGT@1,2SN55@2759,3A2E8@33154,3P3M4@4751,3QV0R@4890,3TNS4@5125	NA|NA|NA
FGMG_010157-RA	5518.FGSG_05046P0	2.3e-66	258.1	Nectriaceae													Fungi	1FVAF@110618,21BQD@147550,2ENXI@1,2SS8Q@2759,3A7TE@33154,3P635@4751,3QXGR@4890,3TP0P@5125	NA|NA|NA
FGMG_000088-RA	101028.EKJ69182	5.7e-67	260	Nectriaceae													Fungi	1FYAC@110618,21F6K@147550,2ETJK@1,2SVWA@2759,3APCA@33154,3PEUX@4751,3R40H@4890,3TMR4@5125	NA|NA|NA	S	Kp4
FGMG_003989-RA	101028.EKJ71654	6e-123	446.8	Hypocreales													Fungi	21F6M@147550,2EZC4@1,2T0PQ@2759,3AVGJ@33154,3PHJA@4751,3R5HE@4890,3TMP3@5125	NA|NA|NA
FGMG_007051-RA	5518.FGSG_08007P0	1.5e-161	575.5	Nectriaceae			1.14.18.1	ko:K00505	ko00350,ko00950,ko00965,ko01100,ko01110,ko04916,map00350,map00950,map00965,map01100,map01110,map04916	M00042	R00731,R02078,R02363,R02383,R04693,R04884	RC00046,RC00150,RC00180	ko00000,ko00001,ko00002,ko01000				Fungi	1FX20@110618,217JB@147550,28J2M@1,2QRET@2759,39UHZ@33154,3NXHW@4751,3QR9K@4890,3TIFH@5125	NA|NA|NA	S	Common central domain of tyrosinase
FGMG_011865-RA	5518.FGSG_10959P0	5.2e-110	403.7	Nectriaceae													Fungi	1FZFW@110618,21AQY@147550,2EJK8@1,2SPR5@2759,3A5M2@33154,3P40G@4751,3RJ37@4890,3TIAW@5125	NA|NA|NA
FGMG_012178-RA	5518.FGSG_11249P0	2e-233	814.7	Nectriaceae													Fungi	1FKIQ@110618,216C0@147550,38DUK@33154,3NUYK@4751,3QKG5@4890,3TFWT@5125,COG2866@1,KOG2650@2759	NA|NA|NA	O	Zn_pept
FGMG_001424-RA	5518.FGSG_01357P0	2.5e-110	404.8	Nectriaceae	prh1	GO:0000166,GO:0000462,GO:0003674,GO:0003676,GO:0003723,GO:0003724,GO:0003824,GO:0004004,GO:0004386,GO:0005488,GO:0005524,GO:0005575,GO:0005622,GO:0005623,GO:0005634,GO:0005730,GO:0005737,GO:0006139,GO:0006364,GO:0006396,GO:0006725,GO:0006807,GO:0008026,GO:0008144,GO:0008150,GO:0008152,GO:0008186,GO:0009987,GO:0010467,GO:0016070,GO:0016072,GO:0016462,GO:0016787,GO:0016817,GO:0016818,GO:0016887,GO:…	3.6.4.13	ko:K12818,ko:K14781,ko:K17820	ko03040,ko04621,map03040,map04621				ko00000,ko00001,ko01000,ko03009,ko03041				Fungi	1FM2K@110618,2189V@147550,38GIR@33154,3NWVV@4751,3QM0T@4890,3TCP8@5125,COG1643@1,KOG0922@2759	NA|NA|NA	A	to ATP-dependent RNA helicase
FGMG_009980-RA	101028.EKJ75819	1e-50	206.5	Nectriaceae													Fungi	1FVTE@110618,21JHI@147550,2D8JB@1,2TAGR@2759,38T1P@33154,3PURH@4751,3RDZZ@4890,3TQ4F@5125	NA|NA|NA
FGMG_010987-RA	101028.EKJ74043	1.1e-52	212.6	Nectriaceae													Fungi	1FVR3@110618,21BZC@147550,2EXIC@1,2SZ6W@2759,3ADIP@33154,3P9DJ@4751,3QZG4@4890,3TNMQ@5125	NA|NA|NA
FGMG_012007-RA	101028.EKJ75346	8.4e-184	649.4	Nectriaceae			1.14.18.1	ko:K00505	ko00350,ko00950,ko00965,ko01100,ko01110,ko04916,map00350,map00950,map00965,map01100,map01110,map04916	M00042	R00731,R02078,R02363,R02383,R04693,R04884	RC00046,RC00150,RC00180	ko00000,ko00001,ko00002,ko01000				Fungi	1FZSW@110618,21RY7@147550,29DZU@1,2S31Y@2759,3A4NI@33154,3Q5J5@4751,3RNJW@4890,3TUSB@5125	NA|NA|NA	E	Common central domain of tyrosinase
FGMG_008741-RA	101028.EKJ75663	8.3e-108	396.4	Nectriaceae													Fungi	1FYH9@110618,21NUB@147550,2C548@1,2RW58@2759,38VDE@33154,3Q0G1@4751,3R4IP@4890,3TNQ6@5125	NA|NA|NA
FGMG_001974-RA	5518.FGSG_01872P0	2.4e-147	528.1	Nectriaceae													Fungi	1FMH0@110618,213HG@147550,2CZ37@1,2S85Z@2759,3A022@33154,3P21A@4751,3QUPE@4890,3THMP@5125	NA|NA|NA	S	Protein of unknown function (DUF3455)
FGMG_003805-RA	5518.FGSG_10649P0	2.1e-95	355.5	Nectriaceae													Fungi	1FUJM@110618,21GY5@147550,290FT@1,2RJ9X@2759,38NZF@33154,3PQUW@4751,3RABP@4890,3TNSW@5125	NA|NA|NA
FGMG_011260-RA	5518.FGSG_06106P0	2.7e-108	398.3	Nectriaceae													Fungi	1FRRA@110618,21FIX@147550,2C68Z@1,2RS78@2759,3AR24@33154,3PFSZ@4751,3R418@4890,3TVYF@5125	NA|NA|NA
FGMG_003746-RA	5518.FGSG_10592P0	2e-67	261.5	Nectriaceae													Fungi	1FY0Q@110618,21C1Q@147550,2ES2E@1,2SUQU@2759,3ATWF@33154,3PI3K@4751,3QZ6H@4890,3TRKJ@5125	NA|NA|NA
FGMG_004856-RA	5518.FGSG_03840P0	2.6e-126	458.4	Nectriaceae													Fungi	1FM01@110618,21RCX@147550,2AX57@1,2S5ST@2759,3AJSI@33154,3Q49A@4751,3R2IX@4890,3TUJE@5125	NA|NA|NA
FGMG_009952-RA	5518.FGSG_04858P0	6e-129	467.2	Nectriaceae													Fungi	1FTYB@110618,218AQ@147550,2EM30@1,2SQUM@2759,3A4HZ@33154,3P4JM@4751,3QX9F@4890,3TFS6@5125	NA|NA|NA	S	GLEYA domain
FGMG_012354-RA	5518.FGSG_11411P0	2.6e-253	880.9	Nectriaceae													Fungi	1FW8D@110618,213HZ@147550,38GBP@33154,3NXTI@4751,3QMQ7@4890,3TSBY@5125,COG2234@1,KOG2195@2759	NA|NA|NA	O	Belongs to the peptidase M28 family
FGMG_007608-RA	5518.FGSG_09390P0	1.3e-119	436.4	Nectriaceae													Fungi	1FQ2X@110618,2137P@147550,28NA8@1,2QUVP@2759,39WDD@33154,3NW4K@4751,3QM1X@4890,3TM52@5125	NA|NA|NA
FGMG_012302-RA	5518.FGSG_11366P0	8.6e-232	809.3	Nectriaceae													Fungi	1FSID@110618,21PJT@147550,28PEG@1,2QW2A@2759,38ZAG@33154,3NXQZ@4751,3R2X6@4890,3TJTH@5125	NA|NA|NA	G	Belongs to the glycosyl hydrolase 43 family
FGMG_005370-RA	5518.FGSG_03366P0	2.4e-291	1007.3	Nectriaceae			3.1.3.2	ko:K01078	ko00730,ko00740,ko01100,map00730,map00740,map01100		R00548,R02135	RC00017	ko00000,ko00001,ko01000				Fungi	1FPZE@110618,218H1@147550,38V8Z@33154,3NY0I@4751,3QKR3@4890,3TM3Y@5125,KOG1382@1,KOG1382@2759	NA|NA|NA	S	Belongs to the histidine acid phosphatase family
FGMG_011673-RA	5518.FGSG_10784P0	8.6e-59	232.6	Nectriaceae													Fungi	1FVPZ@110618,21GXW@147550,29G8V@1,2RPEY@2759,38NZ6@33154,3PQUN@4751,3RABD@4890,3TP82@5125	NA|NA|NA
FGMG_012150-RA	5518.FGSG_11231P0	8.3e-215	752.7	Nectriaceae				ko:K07140					ko00000				Fungi	1FP7X@110618,216CG@147550,39SS8@33154,3NZW8@4751,3QRMB@4890,3TSWU@5125,COG3217@1,KOG2362@2759	NA|NA|NA	S	MOSC domain
FGMG_000652-RA	5518.FGSG_00602P0	8.7e-170	602.8	Nectriaceae													Fungi	1FTW4@110618,219BZ@147550,2BYRN@1,2SFI5@2759,394DQ@33154,3P9T0@4751,3REHE@4890,3TI9J@5125	NA|NA|NA
FGMG_003521-RA	5518.FGSG_10387P0	2e-249	867.8	Nectriaceae			3.2.1.101	ko:K08257					ko00000,ko00537,ko01000		GH76		Fungi	1FRQ1@110618,217XS@147550,28KFK@1,2QSWP@2759,39Y5K@33154,3P0AR@4751,3QMHV@4890,3TG8X@5125	NA|NA|NA	G	Mannan endo-1,6-alpha-mannosidase
FGMG_004709-RA	5518.FGSG_03967P0	2.3e-221	774.6	Nectriaceae		GO:0000322,GO:0000323,GO:0000324,GO:0000328,GO:0003674,GO:0003824,GO:0004180,GO:0005575,GO:0005622,GO:0005623,GO:0005737,GO:0005773,GO:0005775,GO:0006508,GO:0006807,GO:0008150,GO:0008152,GO:0008233,GO:0008238,GO:0009056,GO:0009057,GO:0009987,GO:0016787,GO:0019538,GO:0030163,GO:0031974,GO:0043170,GO:0043226,GO:0043227,GO:0043229,GO:0043231,GO:0043233,GO:0044237,GO:0044238,GO:0044248,GO:0044257,GO:…	3.4.17.4	ko:K01293					ko00000,ko01000,ko01002				Fungi	1FQCC@110618,218BH@147550,39RWD@33154,3NU4A@4751,3QNFR@4890,3TJK4@5125,COG0624@1,KOG2275@2759	NA|NA|NA	E	Peptidase family M20/M25/M40
FGMG_012002-RA	5518.FGSG_11101P0	9.8e-261	905.6	Nectriaceae													Fungi	1FMKC@110618,217SJ@147550,2EEYI@1,2SK8S@2759,3AGHB@33154,3PB3C@4751,3QTHI@4890,3TVF7@5125	NA|NA|NA
FGMG_002745-RA	101028.EKJ71197	3.5e-145	520.8	Nectriaceae													Fungi	1FR2U@110618,2182J@147550,2CNES@1,2QVRD@2759,39VA6@33154,3NX9J@4751,3QP4T@4890,3TVUF@5125	NA|NA|NA	G	Glycosyl hydrolase family 61
FGMG_005079-RA	5518.FGSG_03632P0	9.5e-146	523.1	Nectriaceae													Fungi	1FZ4V@110618,21F5K@147550,2ECWD@1,2SING@2759,3AEJ3@33154,3PCVJ@4751,3R1JS@4890,3TSKE@5125	NA|NA|NA	S	Glycosyl hydrolase family 61
FGMG_003973-RA	5518.FGSG_04661P0	9e-89	332.8	Nectriaceae													Fungi	1FV0D@110618,21GS5@147550,29EFS@1,2RMKT@2759,38NPW@33154,3PQJU@4751,3RA2D@4890,3TNWS@5125	NA|NA|NA
FGMG_003790-RA	5518.FGSG_10634P0	8.7e-106	389.8	Nectriaceae			3.1.1.74	ko:K08095					ko00000,ko01000				Fungi	1FZ5I@110618,21A6S@147550,2A1QU@1,2SI38@2759,3A01F@33154,3P2ER@4751,3QVGK@4890,3TSPZ@5125	NA|NA|NA	G	Catalyzes the hydrolysis of cutin, a polyester that forms the structure of plant cuticle
FGMG_008451-RA	101028.EKJ70899	3.5e-80	305.1	Nectriaceae													Fungi	1FNER@110618,21GHS@147550,2FBNI@1,2TCW5@2759,3AWD9@33154,3PWKN@4751,3RFJM@4890,3TVI8@5125	NA|NA|NA
FGMG_005868-RA	101028.EKJ73085	1.3e-111	409.5	Nectriaceae													Fungi	1FUQ1@110618,21IH6@147550,2RMMS@2759,38RB4@33154,3PT3X@4751,3RCI4@4890,3TS0W@5125,COG1680@1	NA|NA|NA	V	peptidase activity
FGMG_007043-RA	5518.FGSG_08012P0	1e-199	702.6	Nectriaceae													Fungi	1FU4B@110618,2133Q@147550,38H6S@33154,3NU05@4751,3QR0F@4890,3THUC@5125,COG1404@1,KOG1153@2759	NA|NA|NA	O	Belongs to the peptidase S8 family
FGMG_003875-RA	5518.FGSG_11516P0	1.1e-223	782.3	Hypocreales		GO:0003674,GO:0003824,GO:0004553,GO:0004560,GO:0005975,GO:0005976,GO:0006073,GO:0008150,GO:0008152,GO:0009987,GO:0010383,GO:0010410,GO:0010411,GO:0015928,GO:0016787,GO:0016798,GO:0043170,GO:0044036,GO:0044042,GO:0044237,GO:0044238,GO:0044260,GO:0044262,GO:0044264,GO:0071554,GO:0071704	3.2.1.51	ko:K15923	ko00511,map00511				ko00000,ko00001,ko01000		GH95		Fungi	21732@147550,2CMG6@1,2QQ9E@2759,39RHY@33154,3P0EA@4751,3QQGC@4890,3TTSA@5125	NA|NA|NA	O	Glycosyl hydrolase family 65, N-terminal domain
FGMG_004211-RA	5518.FGSG_04437P0	1.7e-108	399.1	Nectriaceae													Fungi	1FTWY@110618,21C7W@147550,293MT@1,2RAIK@2759,3AB3H@33154,3P7SY@4751,3QZ8M@4890,3TWDI@5125	NA|NA|NA
FGMG_004853-RA	101028.EKJ73216	1.3e-273	948.3	Nectriaceae			3.2.1.1	ko:K01176	ko00500,ko01100,ko04973,map00500,map01100,map04973		R02108,R02112,R11262		ko00000,ko00001,ko01000		GH13		Fungi	1FPXE@110618,214SP@147550,38EYC@33154,3NV3E@4751,3QK27@4890,3TE41@5125,COG0366@1,KOG0471@2759	NA|NA|NA	G	Alpha-amylase domain
FGMG_004597-RA	5518.FGSG_04074P0	1.4e-104	385.6	Nectriaceae		GO:0000003,GO:0000905,GO:0003006,GO:0005575,GO:0005576,GO:0007049,GO:0007275,GO:0008150,GO:0009653,GO:0009987,GO:0019953,GO:0019954,GO:0022402,GO:0022414,GO:0030154,GO:0030435,GO:0030582,GO:0030584,GO:0032501,GO:0032502,GO:0034293,GO:0043934,GO:0043935,GO:0044703,GO:0048468,GO:0048608,GO:0048646,GO:0048731,GO:0048856,GO:0048869,GO:0051321,GO:0051704,GO:0061458,GO:0070787,GO:0070790,GO:0075259,GO:…											Fungi	1FZ93@110618,21A9M@147550,2EIJU@1,2SNZ2@2759,3A41K@33154,3P438@4751,3QVT4@4890,3TT0B@5125	NA|NA|NA	S	cell wall protein
FGMG_005890-RA	5518.FGSG_02890P0	9.5e-121	439.5	Nectriaceae			3.1.1.74	ko:K08095					ko00000,ko01000				Fungi	1FZ5H@110618,219VR@147550,2A1QU@1,2SI38@2759,3A01F@33154,3P2FW@4751,3QUDE@4890,3TSPY@5125	NA|NA|NA	G	Catalyzes the hydrolysis of cutin, a polyester that forms the structure of plant cuticle
FGMG_010160-RA	5518.FGSG_05052P0	3.3e-239	833.9	Nectriaceae			3.5.1.16	ko:K01438	ko00220,ko01100,ko01110,ko01130,ko01210,ko01230,map00220,map01100,map01110,map01130,map01210,map01230	M00028,M00845	R00669,R09107	RC00064,RC00300	ko00000,ko00001,ko00002,ko01000				Fungi	1FMFS@110618,215G0@147550,38BH3@33154,3NUCZ@4751,3QJN0@4890,3TGVA@5125,COG0624@1,KOG2275@2759	NA|NA|NA	E	Peptidase dimerisation domain
# 397 queries scanned
# Total time (seconds): 82.5237939358
# Rate: 4.81 q/s

## Sheet: Table S10
Table S10. Primers used to amplify gene sequences of candidate effectors encoded by the FG-12 genome
Primer	Sequence (5'-3')	Product length (bp)	Melting temperature (°C)
FG95-SmaI-F	TACAAGGGTACCCCCGGGATGCACTGCAACACACTCTCTCTT	729	55
FG95-XbaI-R	CTCTAGTTCATCTAGATTAGATTCTCTGGACGGCAGGT
FG95-SmaI-SP-F	TACAAGGGTACCCCCGGGCACGGTCACGTTGCCAAGGTTA	612	55
FG95-XbaI-SP-R	CTCTAGTTCATCTAGATTAGATTCTCTGGACGGCAGGT
FG25-SmaI-F	TACAAGGGTACCCCCGGGATGAAGTTCCTCAATCCAATTGCTGT	785	55
FG25-XbaI-R	CTCTAGTTCATCTAGACTAGTCCCAAGCTTCGAAGAAACG
FG25-SmaI-SP-F	TACAAGGGTACCCCCGGGGCAACCACTGAAAGCAGTCATCTTA	715	55
FG25-XbaI-SP-R	CTCTAGTTCATCTAGACTAGTCCCAAGCTTCGAAGAAACG
FG99-SmaI-F	TACAAGGGTACCCCCGGGATGCAGTTCACCACCTCCT	288	55
FG99-XbaI-R	CTCTAGTTCATCTAGACTAAGCACAGGCAGTGCAGAC
FG99-SmaI-SP-F	TACAAGGGTACCCCCGGGATGCCACAGGCCGCACCAGTTGA	234	55
FG99-XbaI-SP-R	CTCTAGTTCATCTAGACTAAGCACAGGCAGTGCAGAC
FG64-SmaI-F	TACAAGGGTACCCCCGGGATGCAGTTTTACACTATTTTCCTCGCC	474	55
FG64-XbaI-R	CTCTAGTTCATCTAGACTAAGCCTTGTACCCCTTGCC
FG64-SmaI-SP-F	TACAAGGGTACCCCCGGGACTCCTCAGCCTGAAGCGGCCG	420	55
FG64-XbaI-SP-R	CTCTAGTTCATCTAGACTAAGCCTTGTACCCCTTGCC
FG68-SmaI-F	TACAAGGGTACCCCCGGGATGCTCTTCTTCAAGTCTATCGTCTCT	396	55
FG68-XbaI-R	CTCTAGTTCATCTAGATTAGCTAGTGCCAGTGCAGC
FG68-SmaI-SP-F	TACAAGGGTACCCCCGGGAGCCCCATCGAGACCCG	339	55
FG68-XbaI-SP-R	CTCTAGTTCATCTAGATTAGCTAGTGCCAGTGCAGC

[truncated: 3 more sheets: Table S11, Table S12, Table S13]
